# Supplementary material for: An efficient method for the synthesis of 2-pyridones via C–H bond functionalization
Source: Royal Society of Chemistry journal article supplement (doi:10.1039/d0cc06834a), 2020-01-01

# Supporting Information for

## An Efficient Method for the Synthesis of 2-Pyridones *via* C-H Bond Functionalization

Shuguang Zhou,<sup>a</sup> Duan-Yang Liu,<sup>b</sup> Suo Wang,<sup>a</sup> Jie-Sheng Tian,<sup>\*a,b</sup> and Teck-Peng Loh<sup>\*a,b,c</sup>

<sup>a</sup>Institute of Advanced Synthesis (IAS), Northwestern Polytechnical University (NPU), Xi'an 710072, China. Yangtze River Delta Research Institute of NPU, Taicang Jiangsu, 215400, China.

<sup>b</sup>Institute of Advanced Synthesis (IAS), Nanjing Tech University (NanjingTech), Nanjing 211816, P. R. China.

<sup>c</sup>Division of Chemistry and Biological Chemistry, School of Physical and Mathematical Sciences, Nanyang Technological University, Singapore 637371

*E-mail: ias\_jstian@njtech.edu.cn, teckpeng@ntu.edu.sg*

### Table of Contents

|                                                                                 |     |
|---------------------------------------------------------------------------------|-----|
| 1. General information                                                          | S2  |
| 2. Synthesis and characterization of enamines                                   | S3  |
| 3. Optimization study                                                           | S24 |
| 4. General procedure and characterization for [3+3] annulation into 2-pyridones | S25 |
| 5. Practical utilities of [3+3] annulation into 2-pyridones                     | S45 |
| 6. Mechanistic study                                                            | S46 |
| 7. References                                                                   | S53 |
| 8. <sup>1</sup> H and <sup>13</sup> C NMR spectra                               | S54 |

## **1. General information**

### **Materials:**

All reagents and solvents were purchased from commercial sources and used without further purification unless otherwise stated. HPLC grade CH<sub>3</sub>OH was used directly. Toluene and THF were freshly distilled over Na/benzophenone before use. All chemicals were obtained from local suppliers or synthesized. The preparation of enaminones according to the previous procedure<sup>1-4</sup>.

### **Methods:**

All [Cp\*RhCl<sub>2</sub>]<sub>2</sub>-catalyzed reactions were carried out with precautions to extrude moisture or oxygen. All reactions beyond room temperature (r.t.) were run in oil baths with the temperature calibrated with a thermometer. Prior to an experiment, the oil bath could equilibrate to the desired temperature for 15 min. <sup>1</sup>H, <sup>13</sup>C and <sup>19</sup>F-NMR spectra were recorded on a Bruker 400 (400 MHz for <sup>1</sup>H, 100 MHz for <sup>13</sup>C) or a JEOL ECX-400 (400 MHz for <sup>1</sup>H, 100 MHz for <sup>13</sup>C) or Bruker 500 (500 MHz for <sup>1</sup>H, 125 MHz for <sup>13</sup>C and 471 MHz for <sup>19</sup>F) spectrometer using residue solvent as internal reference. Silica gel (200~300 mesh) was used for flash column chromatography. High resolution mass analyses (ESI+) were performed on Waters mass spectrometer and Agilent 6224. Specific rotations were recorded on a Anton paer MCP 150. The following notations were used: br-broad, s – singlet, d – doublet, t – triplet, q – quartet, m – multiplet, dd – doublet of doublet, dt – doublet of triplet, td – triplet of doublet, ddd – doublet of doublet of doublet.

## 2. Synthesis and characterization of enaminones

### 2.1 General procedure for preparation of enaminone substrates:

Substrate **1a-1ab** synthesis:

Example **1a**:

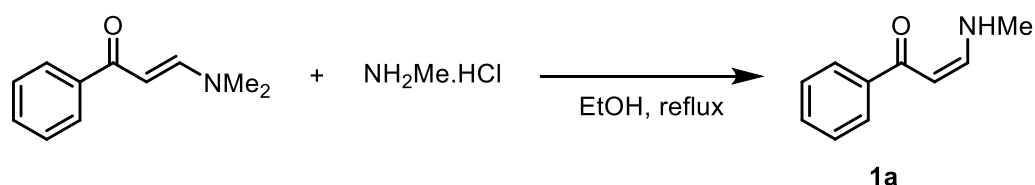

A solution of (*E*)-3-(dimethylamino)-1-phenylprop-2-en-1-one (5 mmol) and methylamine hydrochloride (10 mmol) in ethanol (20 ml) was refluxed and it took 26-68 h to give the product **1a**.

Substrate **1ac** synthesis<sup>5</sup>:

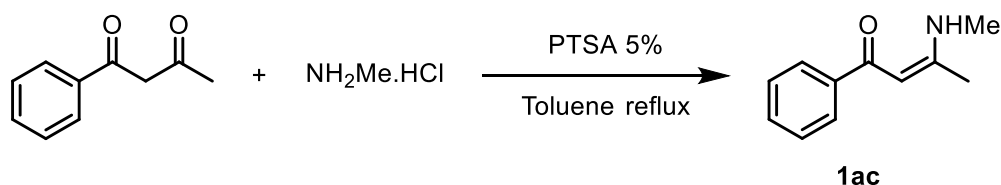

Enaminones **1ac** were prepared by heating of equimolar amounts of the corresponding  $\beta$ -diketone and MeNH<sub>2</sub> in the presence of cat. PTSA. The H<sub>2</sub>O formed during the reaction was removed by azeotropic distillation until only clear toluene distilled. The toluene distilled off was continuously replaced by fresh toluene. After completion of the reaction, the solvent was evaporated in vacuo and the residue was purified by vacuum distillation or crystallisation.

Substrate **1ad-1af** synthesis<sup>6</sup>:

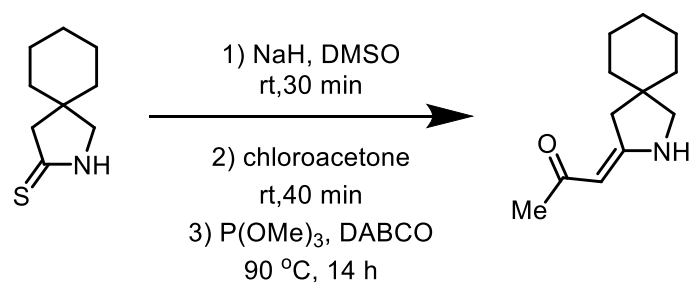

General Procedure for substrate **1ad-1af** synthesis. To a solution of thioamide (1 mmol, 1.00 equiv) in DMSO (5 mL) was added NaH (95%) (1.1 mmol, 1.10 equiv), and the mixture was stirred at room temperature for 30 min under argon. The reaction mixture was treated with alkyl halide (1.05 mmol, 1.05 equiv), and after 30 min of stirring at rt, trimethyl phosphite (3 mmol, 3 equiv) and DABCO (3 mmol, 3 equiv) were added and the solution was allowed to stir at 90°C (internal temperature) until all alkylated species were consumed according to TLC (2-14 h). (In cases when chloroacetone was used as electrophile, 2 equiv of NaH and 2.5 equiv of chloroacetone gave the best results. Aryl halides were usually added in 1.1 equiv amounts, but in some cases 1.00 or 1.10 equiv was used. The actual amounts are specified below for each experiment.) After this time, the reaction mixture was poured into distilled water (50 mL) and extracted with CH<sub>2</sub>Cl<sub>2</sub> (3×40 mL). The combined organic fractions were washed with water (5×80 mL), dried over Na<sub>2</sub>SO<sub>4</sub>, and evaporated under reduced pressure. Excess trimethyl phosphite and thioadducts were removed by coevaporation with ethanol. Crude products were usually solid, but in some cases the oily or semisolid crude material could be precipitated by addition of ethanol. Crude products were recrystallized from ethanol and oily products were purified by flash chromatography (EtOAc/Hep 1:4).

## 2.2 General procedure for characterization of enaminone substrates:

### (Z)-3-(methylamino)-1-phenylprop-2-en-1-one (1a):

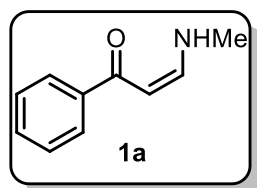

The synthetic method was followed the synthetic procedure of compound **1a**.

Flash chromatography: PE/EA (5:1)

The title compound was obtained as a brown solid. Yield = 81% (652 mg), mp: 138.2-139.1 °C.

**<sup>1</sup>H NMR (400 MHz, CDCl<sub>3</sub>)** δ 10.21 (s, 1H), 7.90 – 7.80 (m, 2H), 7.46 – 7.36 (m, 3H), 6.92 (dd, *J* = 12.8, 7.4 Hz, 1H), 5.70 (d, *J* = 7.4 Hz, 1H), 3.07 (d, *J* = 5.1 Hz, 3H).

**<sup>13</sup>C NMR (101 MHz, CDCl<sub>3</sub>)** δ 190.2, 155.7, 140.1, 131.1, 128.5, 127.3, 90.5, 35.6.

**HRMS (ESI, *m/z*):** Calcd. for C<sub>10</sub>H<sub>12</sub>NO: [M+H]<sup>+</sup>, 162.0919. Found: *m/z* 162.0917.

### 1-(2-fluorophenyl)-3-(methylamino)prop-2-en-1-one (1b):

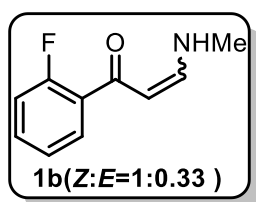

The synthetic method was followed the synthetic procedure of compound **1a**.

Flash chromatography: PE/EA (5:1)

The title compound was obtained as a brown solid in an inseparable state (1:0.33 by **<sup>1</sup>H NMR**). Yield = 54% (484 mg), mp: 88.6-90.3 °C.

**<sup>1</sup>H NMR (400 MHz, CDCl<sub>3</sub>)** δ 10.24 (s, 1H), 7.77-7.81 (m, 1H × 1 + 1H × 0.33), 7.35-7.38

(m, 1H × 1 + 1H × 0.33), 7.16 – 7.20 (m, 1H × 1 + 1H × 0.33), 7.04-7.09 (m, 1H × 1 + 1H × 0.33), 6.89-6.94 (m, 1H × 1 + 1H × 0.33), 5.65-5.68 (m, 1H × 1 + 1H × 0.33), 3.08 (d,  $J = 2.6$  Hz, 3H × 1), 2.83 (s, 3H × 0.33).

**$^{13}\text{C}$  NMR (101 MHz,  $\text{CDCl}_3$ )**  $\delta$  186.6, 160.6 (d,  $J = 251.9$  Hz), 155.9, 132.06 (d,  $J = 8.8$  Hz), 130.4 (d,  $J = 3.4$  Hz), 128.6 (d,  $J = 13.2$  Hz), 124.3 (d,  $J = 3.6$  Hz), 116.5 (d,  $J = 24.0$  Hz), 116.2, 94.8 (dd,  $J = 9.5, 1.4$  Hz), 35.7.

**$^{19}\text{F}$  NMR (471 MHz,  $\text{CDCl}_3$ )**  $\delta$  -112.50.

**HRMS (ESI,  $m/z$ ):** Calcd. for  $\text{C}_{10}\text{H}_{11}\text{NOF}$ :  $[\text{M}+\text{H}]^+$ , 180.0825. Found:  $m/z$  180.0826.

**(Z)-3-(methylamino)-1-(o-tolyl)prop-2-en-1-one (1c):**

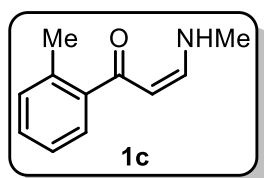

The synthetic method was followed the synthetic procedure of compound **1a**.

Flash chromatography: PE/EA (5:1)

The title compound was obtained as a brown solid, Yield = 62% (543 mg), mp: 85.2-86.1 °C.

**$^1\text{H}$  NMR (400 MHz,  $\text{CDCl}_3$ )**  $\delta$  10.09 (s, 1H), 7.43 – 7.37 (m, 1H), 7.27 – 7.22 (m, 1H), 7.18 (d,  $J = 7.5$  Hz, 2H), 6.85 (dd,  $J = 12.9, 7.3$  Hz, 1H), 5.31 (d,  $J = 7.3$  Hz, 1H), 3.07 (d,  $J = 5.1$  Hz, 3H), 2.46 (s, 3H).

**$^{13}\text{C}$  NMR (101 MHz,  $\text{CDCl}_3$ )**  $\delta$  195.2, 155.2, 141.8, 131.1, 129.2, 127.6, 125.6, 94.5, 35.6, 20.5.

**HRMS (ESI,  $m/z$ ):** Calcd. for  $\text{C}_{11}\text{H}_{14}\text{NO}$ :  $[\text{M}+\text{H}]^+$ , 176.1075. Found:  $m/z$  176.1073.

**(Z)-1-(2-methoxyphenyl)-3-(methylamino)prop-2-en-1-one (1d):**

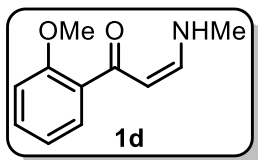

The synthetic method was followed the synthetic procedure of compound **1a**.

Flash chromatography: PE/EA (3:1)

The title compound was obtained as a brown solid, Yield = 65% (621 mg), mp: 72.6-73.7 °C.

**<sup>1</sup>H NMR (400 MHz, CDCl<sub>3</sub>)** δ 10.13 (s, 1H), 7.59 (d, *J* = 7.4 Hz, 1H), 7.33 (t, *J* = 7.7 Hz, 1H), 7.06 – 6.73 (m, 3H), 5.63 (d, *J* = 7.3 Hz, 1H), 3.84 (s, 3H), 3.03 (d, *J* = 5.0 Hz, 3H).

**<sup>13</sup>C NMR (101 MHz, CDCl<sub>3</sub>)** δ 190.8, 157.2, 154.9, 131.2, 130.8, 129.8, 120.6, 111.5, 95.3, 55.7, 35.5.

**HRMS (ESI, *m/z*):** Calcd. for C<sub>11</sub>H<sub>14</sub>NO<sub>2</sub>: [M+H]<sup>+</sup>, 192.1025. Found: *m/z* 192.1025.

### 1-(3-fluorophenyl)-3-(methylamino)prop-2-en-1-one (**1e**):

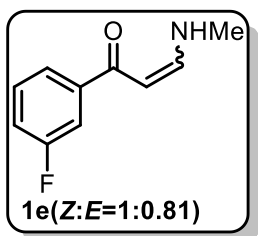

The synthetic method was followed the synthetic procedure of compound **1a**.

Flash chromatography: PE/EA (5:1)

The title compound was obtained as a brown solid in an inseparable state (1:0.81 by **<sup>1</sup>H NMR**), Yield = 58% (519 mg), mp: 87.2-87.8 °C.

**<sup>1</sup>H NMR (400 MHz, CDCl<sub>3</sub>)** δ 10.24 (s, , 1H), 7.88-7.93 (m, 1H × 0.81) 7.54-7.67 (m, 2H × 1 + 2H × 0.81), 7.33-7.39 (m, 1H × 1 + 1H × 0.81), 7.10 – 7.17 (m, 1H × 1 + 1H × 0.81), 6.92-6.97 (m, 1H × 1), 5.79-5.82 (m, 1H × 0.81), 5.63-5.65 (m, 1H × 1), 3.07 (d, *J* = 2.6 Hz, 3H × 1), 2.87 (s, 3H × 0.81).

**<sup>13</sup>C NMR (101 MHz, CDCl<sub>3</sub>)** δ 188.3(*Z*), 188.0(*E*), 163.0 (d, *J* = 247.0 Hz)(*Z*), 162.9 (d, *J* = 247.2 Hz), 156.2(*Z*), 152.4(*E*), 142.8 (d, *J* = 5.9 Hz)(*E*), 142.3 (d, *J* = 6.2 Hz)(*Z*), 129.9 (d, *J* = 7.7, 3.5 Hz)(*ZE*), 123.3(*E*), 122.7 (d, *J* = 2.8 Hz)(*Z*), 118.0(d, *J* = 23.3 Hz)(*E*), 117.7(d, *J* = 22.1 Hz)(*Z*), 114.5(d, *J* = 21.6 Hz)(*E*), 114.0(d, *J* = 22.2 Hz)(*Z*), 92.2(*E*), 90.2(*Z*), 35.6(*Z*), 30.4(*E*).

**<sup>19</sup>F NMR (471 MHz, CDCl<sub>3</sub>)** δ -113.14.

**HRMS (ESI, *m/z*):** Calcd. for C<sub>10</sub>H<sub>11</sub>NOF: [M+H]<sup>+</sup>, 180.0825. Found: *m/z* 180.0830.

**(*Z*)-3-(methylamino)-1-(*m*-tolyl)prop-2-en-1-one (1f):**

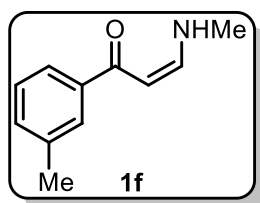

The synthetic method was followed the synthetic procedure of compound **1a**.

Flash chromatography:PE/EA (5:1)

The title compound was obtained as a brown solid, Yield = 72% (630 mg), mp: 50.5-51.6 °C.

**<sup>1</sup>H NMR (400 MHz, CDCl<sub>3</sub>)** δ 10.20 (s, 1H), 7.71 – 7.63 (m, 2H), 7.32 – 7.22 (m, 2H), 6.90 (dd, *J* = 12.8, 7.4 Hz, 1H), 5.69 (d, *J* = 7.4 Hz, 1H), 3.06 (d, *J* = 5.1 Hz, 3H), 2.39 (s, 3H).

**<sup>13</sup>C NMR (101 MHz, CDCl<sub>3</sub>)** δ 190.3, 155.6, 140.0, 138.0, 131.8, 128.3, 127.8, 124.3, 90.5, 35.6, 21.6.

**HRMS (ESI, *m/z*):** Calcd. for C<sub>11</sub>H<sub>14</sub>NO: [M+H]<sup>+</sup>, 176.1075. Found: *m/z* 176.1077.

**(*Z*)-1-(3-methoxyphenyl)-3-(methylamino)prop-2-en-1-one (1g):**



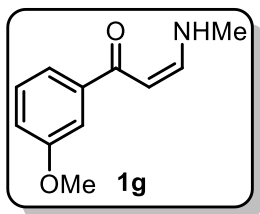

The synthetic method was followed the synthetic procedure of compound **1a**.

Flash chromatography: PE/EA (3:1)

The title compound was obtained as a brown solid, Yield = 68% (650 mg), mp: 54.5-55.6 °C.

**<sup>1</sup>H NMR (400 MHz, CDCl<sub>3</sub>)** δ 10.20 (s, 1H), 7.71 – 7.63 (m, 2H), 7.32 – 7.22 (m, 2H), 6.90 (dd, *J* = 12.8, 7.4 Hz, 1H), 5.69 (d, *J* = 7.4 Hz, 1H), 3.06 (d, *J* = 5.1 Hz, 3H), 2.39 (s, 3H).

**<sup>13</sup>C NMR (101 MHz, CDCl<sub>3</sub>)** δ 189.8, 159.9, 155.8, 141.5, 129.4, 119.7, 117.4, 111.9, 90.6, 55.5, 35.6.

**HRMS (ESI, *m/z*):** Calcd. for C<sub>11</sub>H<sub>14</sub>NO<sub>2</sub>: [M+H]<sup>+</sup>, 192.1025. Found: *m/z* 192.1019.

**(Z)-1-(4-fluorophenyl)-3-(methylamino)prop-2-en-1-one (1h):**

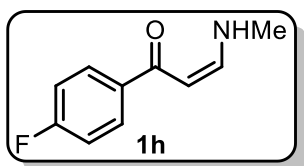

The synthetic method was followed the synthetic procedure of compound **1a**.

Flash chromatography: PE/EA (5:1)

The title compound was obtained as a brown solid, Yield = 59% (528 mg), mp: 114.2-115.9 °C.

**<sup>1</sup>H NMR (400 MHz, CDCl<sub>3</sub>)** δ 10.17 (s, 1H), 7.89 – 7.83 (m, 2H), 7.08 – 7.03 (m, 2H), 6.91 (ddd, *J* = 12.9, 7.3, 0.8 Hz, 1H), 5.63 (dd, *J* = 7.4, 1.2 Hz, 1H), 3.06 (dd, *J* = 5.1, 1.7 Hz, 3H).

**<sup>13</sup>C NMR (101 MHz, CDCl<sub>3</sub>)** δ 188.6, 164.6(d, *J* = 251.3 Hz), 155.8, 136.2 (d, *J* = 3.1 Hz), 129.4 (d, *J* = 8.9 Hz), 115.3(d, *J* = 21.7 Hz), 90.0, 35.6.

**<sup>19</sup>F NMR (471 MHz, CDCl<sub>3</sub>)**  $\delta$  -109.75.

**HRMS (ESI, m/z):** Calcd. for C<sub>10</sub>H<sub>11</sub>NOF: [M+H]<sup>+</sup>, 180.0825. Found: *m/z* 180.0822.

**(Z)-1-(4-chlorophenyl)-3-(methylamino)prop-2-en-1-one (1i):**

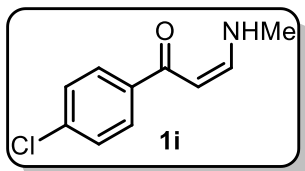

The synthetic method was followed the synthetic procedure of compound **1a**.

Flash chromatography: PE/EA (5:1)

The title compound was obtained as a brown solid, Yield = 75% (732 mg), mp: 109.7-111.2 °C.

**<sup>1</sup>H NMR (400 MHz, CDCl<sub>3</sub>)**  $\delta$  10.21 (s, 1H), 7.81 – 7.73 (m, 2H), 7.37 – 7.31 (m, 2H), 6.90 (dd, *J* = 12.9, 7.3 Hz, 1H), 5.62 (d, *J* = 7.3 Hz, 1H), 3.05 (d, *J* = 5.1 Hz, 3H).

**<sup>13</sup>C NMR (101 MHz, CDCl<sub>3</sub>)**  $\delta$  188.5, 156.0, 138.3, 137.0, 128.6, 90.1, 35.7.

**HRMS (ESI, m/z):** Calcd. for C<sub>10</sub>H<sub>11</sub>NOCl: [M+H]<sup>+</sup>, 196.0529. Found: *m/z* 196.0529.

**(Z)-1-(4-bromophenyl)-3-(methylamino)prop-2-en-1-one (1j):**

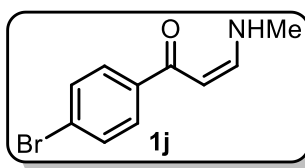

The synthetic method was followed the synthetic procedure of compound **1a**.

Flash chromatography: PE/EA (3:1)

The title compound was obtained as a brown solid, Yield = 80% (956 mg), mp: 117.5-118.2 °C.

**<sup>1</sup>H NMR (400 MHz, CDCl<sub>3</sub>)** δ 10.22 (s, 1H), 7.73 – 7.66 (m, 2H), 7.53 – 7.48 (m, 2H), 6.90 (dd, *J* = 12.9, 7.3 Hz, 1H), 5.61 (d, *J* = 7.3 Hz, 1H), 3.05 (d, *J* = 5.1 Hz, 3H).

**<sup>13</sup>C NMR (101 MHz, CDCl<sub>3</sub>)** δ 188.5, 156.0, 138.7, 131.5, 128.8, 125.6, 90.0, 35.7.

**HRMS (ESI, *m/z*):** Calcd. for C<sub>10</sub>H<sub>11</sub>NOBr: [M+H]<sup>+</sup>, 240.0024. Found: *m/z* 240.0024.

**(Z)-3-(methylamino)-1-(p-tolyl)prop-2-en-1-one (1k):**

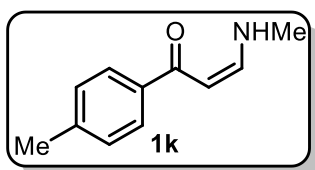

The synthetic method was followed the synthetic procedure of compound **1a**.

Flash chromatography: PE/EA (5:1)

The title compound was obtained as a brown solid, Yield = 77% (674 mg), mp: 121.8-122.0 °C.

**<sup>1</sup>H NMR (400 MHz, CDCl<sub>3</sub>)** δ 10.17 (s, 1H), 7.79 – 7.74 (m, 2H), 7.21 (d, *J* = 8.0 Hz, 2H), 6.89 (dd, *J* = 12.8, 7.4 Hz, 1H), 5.68 (d, *J* = 7.4 Hz, 1H), 3.06 (d, *J* = 5.1 Hz, 3H), 2.38 (s, 3H).

**<sup>13</sup>C NMR (101 MHz, CDCl<sub>3</sub>)** δ 189.9, 155.4, 141.3, 137.2, 129.1, 127.2, 90.2, 35.5, 21.6.

**HRMS (ESI, *m/z*):** Calcd. for C<sub>11</sub>H<sub>14</sub>NO: [M+H]<sup>+</sup>, 176.1075. Found: *m/z* 176.1077.

**(Z)-1-(4-methoxyphenyl)-3-(methylamino)prop-2-en-1-one (1l):**

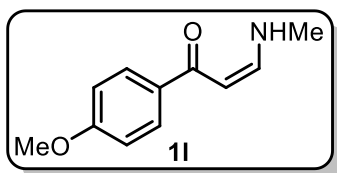

The synthetic method was followed the synthetic procedure of compound **1a**.

Flash chromatography: PE/EA (5:1)

The title compound was obtained as a brown solid, Yield = 71% (679 mg), mp: 88.1-88.7 °C.

**<sup>1</sup>H NMR (400 MHz, CDCl<sub>3</sub>)** δ 10.09 (s, 1H), 7.84 (d, *J* = 8.9 Hz, 2H), 6.92 – 6.83 (m, 3H), 5.65 (d, *J* = 7.5 Hz, 1H), 3.83 (s, 3H), 3.04 (d, *J* = 5.1 Hz, 3H).

**<sup>13</sup>C NMR (101 MHz, CDCl<sub>3</sub>)** δ 189.2, 162.0, 155.2, 132.7, 129.1, 113.6, 89.9, 55.5, 35.5.

**HRMS (ESI, *m/z*):** Calcd. for C<sub>11</sub>H<sub>14</sub>NO<sub>2</sub>: [M+H]<sup>+</sup>, 192.1025. Found: *m/z* 192.1022.

### (Z)-3-(methylamino)-1-(4-(trifluoromethyl)phenyl)prop-2-en-1-one

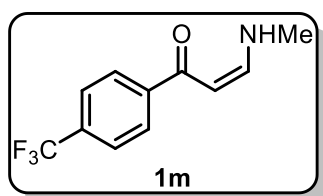

The synthetic method was followed the synthetic procedure of compound **1a**.

Flash chromatography: PE/EA (3:1)

The title compound was obtained as a brown solid, Yield=53% (607mg), mp: 103.7-104.9 °C.

**<sup>1</sup>H NMR (500 MHz, CDCl<sub>3</sub>)** δ 10.32 (s, 1H), 7.94 (d, *J* = 8.0 Hz, 2H), 7.65 (d, *J* = 7.9 Hz, 2H), 7.04 – 6.91 (m, 1H), 5.71 – 5.61 (m, 1H), 3.09 (s, 3H).

**<sup>13</sup>C NMR (126 MHz, CDCl<sub>3</sub>)** δ 188.4, 156.4, 143.2, 132.4 (q, *J* = 32.3 Hz), 127.5, 126.4 (q, *J* = 273 Hz), 125.5 (q, *J* = 3.7 Hz), 90.5, 35.7.

**<sup>19</sup>F NMR (471 MHz, CDCl<sub>3</sub>)** δ -62.75.

**HRMS (ESI, *m/z*):** Calcd. for C<sub>11</sub>H<sub>11</sub>NOF<sub>3</sub>: [M+H]<sup>+</sup>, 230.0787. Found: *m/z* 230.0795.

### Methyl (Z)-4-(3-(methylamino)acryloyl)benzoate

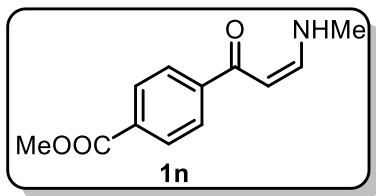

The synthetic method was followed the synthetic procedure of compound **1a**.

Flash chromatography: PE/EA (3:1)

The title compound was obtained as a brown solid, Yield =43% (471mg), mp: 96.6-98.4 °C.

**<sup>1</sup>H NMR (500 MHz, CDCl<sub>3</sub>)** δ 10.32 (s, 1H), 8.05 (dd, J = 6.7, 1.3 Hz, 2H), 7.92 – 7.84 (m, 2H), 7.02 – 6.88 (m, 1H), 5.74 – 5.64 (m, 1H), 3.91 (s, 3H), 3.09 (s, 3H).

**<sup>13</sup>C NMR (126 MHz, CDCl<sub>3</sub>)** δ 188.7, 166.9, 156.3, 143.9, 132.0, 129.7, 127.1, 90.70, 52.4, 35.7.

**HRMS (ESI, m/z):** Calcd. for C<sub>12</sub>H<sub>14</sub>NO<sub>3</sub>: [M+H]<sup>+</sup>, 220.0968. Found: *m/z* 220.0971.

#### **Tert-butyl (Z)-4-(3-(methylamino)acryloyl)phenyl)carbamate**

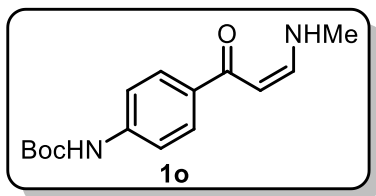

The synthetic method was followed the synthetic procedure of compound **1a**.

Flash chromatography: PE/EA (3:1)

The title compound was obtained as a brown solid, Yield =35% (483mg), mp: 79.4-80.6 °C.

**<sup>1</sup>H NMR (500 MHz, CDCl<sub>3</sub>)** δ 10.12 (s, 1H), 7.86 – 7.78 (m, 2H), 7.39 (d, J = 8.6 Hz, 2H), 6.88 (dd, J = 12.7, 7.4 Hz, 1H), 6.70 (s, 1H), 5.66 (d, J = 7.4 Hz, 1H), 3.05 (d, J = 5.0 Hz, 3H), 1.52 (s, 9H).

**<sup>13</sup>C NMR (126 MHz, CDCl<sub>3</sub>)** δ 189.2, 155.4, 152.7, 141.1, 134.6, 128.5, 117.8, 90.2, 35.6, 29.9, 28.5.

**HRMS (ESI, m/z):** Calcd. for C<sub>15</sub>H<sub>12</sub>N<sub>2</sub>O<sub>3</sub>: [M+H]<sup>+</sup>, 277.1547. Found: *m/z* 277.1548.

**(Z)-3-(methylamino)-1-(naphthalen-2-yl)prop-2-en-1-one (1p):**

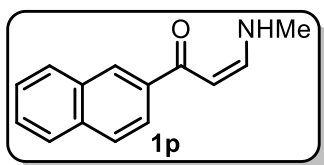

The synthetic method was followed the synthetic procedure of compound **1a**.

Flash chromatography: PE/EA (5:1)

The title compound was obtained as a brown solid, Yield = 55% (581 mg), mp: 101.0-101.8 °C.

**<sup>1</sup>H NMR (400 MHz, CDCl<sub>3</sub>)** δ 10.29 (s, 1H), 8.38 (s, 1H), 7.99 (dd, *J* = 8.6, 1.7 Hz, 1H), 7.93 (dd, *J* = 6.6, 2.5 Hz, 1H), 7.86 (dd, *J* = 8.7, 6.6 Hz, 2H), 7.57 – 7.45 (m, 2H), 6.95 (dd, *J* = 12.8, 7.4 Hz, 1H), 5.85 (d, *J* = 7.4 Hz, 1H), 3.09 (d, *J* = 5.1 Hz, 3H).

**<sup>13</sup>C NMR (101 MHz, CDCl<sub>3</sub>)** δ 190.0, 155.7, 137.3, 134.8, 133.0, 129.4, 128.1, 127.8, 127.6, 127.4, 126.4, 124.3, 90.6, 35.6.

**HRMS (ESI, m/z):** Calcd. for C<sub>14</sub>H<sub>14</sub>NO: [M+H]<sup>+</sup>, 212.1075. Found: *m/z* 212.1078.

**(Z)-1-(furan-2-yl)-3-(methylamino)prop-2-en-1-one (1q):**

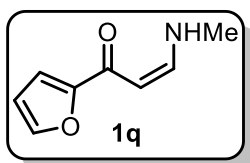

The synthetic method was followed the synthetic procedure of compound **1a**.

Flash chromatography: PE/EA (5:1)

The title compound was obtained as a brown solid, Yield = 40% (302 mg), mp: 52.3-53.7 °C.

**<sup>1</sup>H NMR (400 MHz, CDCl<sub>3</sub>)** δ 9.93 (s, 1H), 7.47 (dd, *J* = 1.6, 0.7 Hz, 1H), 6.98 (dd, *J* = 3.4,

0.7 Hz, 1H), 6.88 (dd,  $J = 12.9, 7.4$  Hz, 1H), 6.46 (dd,  $J = 3.4, 1.7$  Hz, 1H), 5.61 (d,  $J = 7.4$  Hz, 1H), 3.06 (d,  $J = 5.1$  Hz, 3H).

$^{13}\text{C}$  NMR (101 MHz,  $\text{CDCl}_3$ )  $\delta$  179.5, 155.7, 154.3, 144.4, 112.9, 112.0, 90.1, 35.7.

HRMS (ESI,  $m/z$ ): Calcd. for  $\text{C}_8\text{H}_{10}\text{NO}_2$ :  $[\text{M}+\text{H}]^+$ , 152.0712. Found:  $m/z$  152.0710.

**(Z)-3-(methylamino)-1-(thiophen-2-yl)prop-2-en-1-one (1r):**

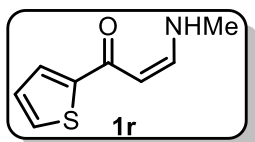

The synthetic method was followed the synthetic procedure of compound **1a**.

Flash chromatography: PE/EA (5:1)

The title compound was obtained as a brown solid, Yield = 47% (393 mg), mp: 84.7-85.6 °C.

$^1\text{H}$  NMR (400 MHz,  $\text{CDCl}_3$ )  $\delta$  9.88 (s, 1H), 7.52 (dd,  $J = 3.7, 1.1$  Hz, 1H), 7.44 (dd,  $J = 4.9, 1.1$  Hz, 1H), 7.04 (dd,  $J = 4.9, 3.7$  Hz, 1H), 6.84 (dd,  $J = 12.9, 7.3$  Hz, 1H), 5.56 (d,  $J = 7.3$  Hz, 1H), 3.03 (d,  $J = 5.1$  Hz, 3H).

$^{13}\text{C}$  NMR (101 MHz,  $\text{CDCl}_3$ )  $\delta$  183.0, 155.4, 146.9, 130.4, 128.0, 127.9, 90.2, 35.7.

HRMS (ESI,  $m/z$ ): Calcd. for  $\text{C}_8\text{H}_{10}\text{NOS}$ :  $[\text{M}+\text{H}]^+$ , 168.0483. Found:  $m/z$  168.0482.

**(Z)-1-ferrocene-3-(phenylamino)prop-2-en-1-one (1s):**

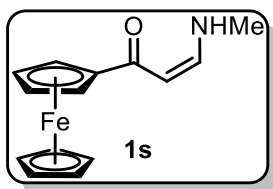

The synthetic method was followed the synthetic procedure of compound **1a**.

Flash chromatography: PE/EA (5:1)

The title compound was obtained as a brown solid, Yield = 38% (507 mg), mp: 136.9-137.5

°C.

**<sup>1</sup>H NMR (400 MHz, CDCl<sub>3</sub>)** δ 9.71 (s, 1H), 6.71 (dd, *J* = 12.7, 7.5 Hz, 1H), 5.29 (d, *J* = 7.4 Hz, 1H), 4.72 (t, *J* = 1.9 Hz, 2H), 4.38 – 4.29 (m, 2H), 4.15 (s, 5H), 3.02 (d, *J* = 5.1 Hz, 3H).

**<sup>13</sup>C NMR (101 MHz, CDCl<sub>3</sub>)** δ 194.1, 153.4, 91.7, 82.3, 71.0, 70.0, 68.6, 35.5.

**HRMS (ESI, *m/z*):** Calcd. for C<sub>14</sub>H<sub>16</sub>NOFe: [M+H]<sup>+</sup>, 268.0628. Found: *m/z* 268.0624.

**(Z)-1-(methylamino)dec-1-en-3-one (1t):**

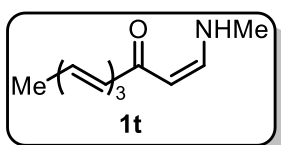

The synthetic method was followed the synthetic procedure of compound **1a**.

Flash chromatography: PE/EA (5:1)

The title compound was obtained as a brown solid, Yield = 49% (434 mg), mp: 114.7-115.3 °C.

**<sup>1</sup>H NMR (400 MHz, CDCl<sub>3</sub>)** <sup>1</sup>H NMR (400 MHz, CDCl<sub>3</sub>) δ 10.13 (s, 1H), 7.11 (dd, *J* = 15.1, 11.2 Hz, 1H), 6.76 (dd, *J* = 12.6, 7.2 Hz, 1H), 6.47 (dd, *J* = 14.8, 10.8 Hz, 1H), 6.28 – 6.05 (m, 3H), 5.86 (dq, *J* = 13.9, 6.8 Hz, 1H), 5.09 (d, *J* = 7.2 Hz, 1H), 3.02 (d, *J* = 5.0 Hz, 3H), 1.80 (d, *J* = 6.8 Hz, 3H).

**<sup>13</sup>C NMR (101 MHz, CDCl<sub>3</sub>)** δ 188.5, 155.1, 139.3, 138.5, 133.5, 131.9, 131.0, 129.2, 94.9, 35.6, 18.8.

**HRMS (ESI, *m/z*):** Calcd. for C<sub>11</sub>H<sub>16</sub>NO: [M+H]<sup>+</sup>, 178.1232. Found: *m/z* 178.1233.

**(Z)-4-(methylamino)but-3-en-2-one (1u):**



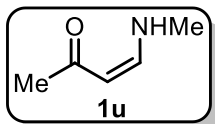

The synthetic method was followed the synthetic procedure of compound **1a**.

Flash chromatography: PE/EA (5:1)

The title compound was obtained as a brown liquid, Yield = 51% (253 mg).

**<sup>1</sup>H NMR (400 MHz, CDCl<sub>3</sub>)** δ 9.62 (s, 1H), 6.60 (dd, *J* = 12.8, 7.3 Hz, 1H), 4.96 (d, *J* = 7.3 Hz, 1H), 2.96 (d, *J* = 5.0 Hz, 3H), 2.01 (s, 3H).

**<sup>13</sup>C NMR (101 MHz, CDCl<sub>3</sub>)** δ 197.5, 154.0, 93.9, 35.4, 29.1.

**HRMS (ESI, *m/z*):** Calcd. for C<sub>5</sub>H<sub>10</sub>NO: [M+H]<sup>+</sup>, 100.0762. Found: *m/z* 100.0762.

**(3S,8R,9S,10R,13S,14S)-10,13-dimethyl-17-((Z)-3-(methylamino) acryloyl)-2,3,4,7,8,9,10,11,12,13,14,15-dodeca hydro-1H-cyclopenta [a] phenanthren-3-yl acetate (1v):**

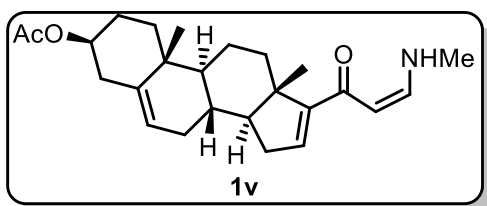

The synthetic method was followed the synthetic procedure of compound **1a**.

Flash chromatography: PE/EA (5:1)

The title compound was obtained as a brown solid, Yield = 46% (914 mg), mp: 151.5-152.9 °C.

**<sup>1</sup>H NMR (400 MHz, CDCl<sub>3</sub>)** δ 9.78 (s, 1H), 6.68 (dd, *J* = 12.7, 7.5 Hz, 1H), 6.39 (dd, *J* = 3.2, 1.8 Hz, 1H), 5.38 (d, *J* = 5.0 Hz, 1H), 5.32 (d, *J* = 7.5 Hz, 1H), 4.62 – 4.57 (m, 1H), 2.98 (d, *J* = 5.1 Hz, 3H), 2.32 (d, *J* = 7.2 Hz, 3H), 2.05 – 2.00 (m, 6H), 1.88 (d, *J* = 3.3 Hz, 2H), 1.66 (d, *J* = 6.6 Hz, 2H), 1.63 – 1.56 (m, 5H), 1.43 (s, 1H), 1.13 (d, *J* = 4.1 Hz, 1H), 1.06 (s,

3H), 1.00 (s, 3H).

$^{13}\text{C}$  NMR (101 MHz,  $\text{CDCl}_3$ )  $\delta$  190.3, 170.8, 156.4, 153.8, 140.4, 136.7, 122.5, 92.0, 74.2, 56.7, 50.7, 46.6, 38.4, 37.1, 37.0, 35.4, 35.2, 32.2, 31.8, 30.5, 28.0, 21.7, 21.0, 19.5, 16.5.

HRMS (ESI,  $m/z$ ): Calcd. for  $\text{C}_{25}\text{H}_{36}\text{NO}_3$ :  $[\text{M}+\text{H}]^+$ , 398.2695. Found:  $m/z$  398.2702.

Specific rotation:  $[\alpha] = -33.600$

**(Z)-3-(benzylamino)-1-phenylprop-2-en-1-one (1w):**

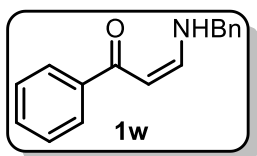

The synthetic method was followed the synthetic procedure of compound **1a**.

Flash chromatography: PE/EA (5:1)

The title compound was obtained as a brown solid, Yield = 66% (783 mg), mp: 74.2-74.5 °C.

$^1\text{H}$  NMR (400 MHz,  $\text{CDCl}_3$ )  $\delta$  10.64 (s, 1H), 7.92 (dd,  $J = 8.0, 1.5$  Hz, 2H), 7.50 – 7.40 (m, 3H), 7.39 – 7.34 (m, 2H), 7.34 – 7.27 (m, 3H), 7.01 (dd,  $J = 12.7, 7.5$  Hz, 1H), 5.79 (d,  $J = 7.5$  Hz, 1H), 4.44 (d,  $J = 6.1$  Hz, 2H).

$^{13}\text{C}$  NMR (101 MHz,  $\text{CDCl}_3$ )  $\delta$  190.3, 154.3, 139.7, 137.9, 131.2, 129.0, 128.4, 127.9, 127.4, 127.3, 90.9, 52.9.

HRMS (ESI,  $m/z$ ): Calcd. for  $\text{C}_{16}\text{H}_{16}\text{NO}$ :  $[\text{M}+\text{H}]^+$ , 238.1232. Found:  $m/z$  238.1230.

**(Z)-1-phenyl-3-((2,2,2-trifluoroethyl)amino)prop-2-en-1-one (1x):**

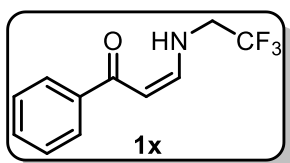

The synthetic method was followed the synthetic procedure of compound **1a**.

Flash chromatography: PE/EA (3:1)

The title compound was obtained as a brown solid, Yield = 54% (619 mg), mp: 100.1-101.1 °C.

**<sup>1</sup>H NMR (400 MHz, CDCl<sub>3</sub>)** δ 10.23 (s, 1H), 7.94 – 7.84 (m, 2H), 7.54 – 7.34 (m, 3H), 6.85 (dd, *J* = 12.0, 7.8 Hz, 1H), 5.88 (d, *J* = 7.8 Hz, 1H), 3.80 – 3.61 (m, 2H).

**<sup>13</sup>C NMR (101 MHz, CDCl<sub>3</sub>)** δ 191.6, 153.5, 139.2, 131.8, 128.6, 127.6, 126.7(q, *J* = 280 Hz), 93.5, 50.2 (q, *J* = 34.34 Hz).

**HRMS (ESI, *m/z*):** Calcd. for C<sub>11</sub>H<sub>11</sub>NOF<sub>3</sub>: [M+H]<sup>+</sup>, 230.0793. Found: *m/z* 230.0798.

**(Z)-3-(allylamino)-1-phenylprop-2-en-1-one (1y):**

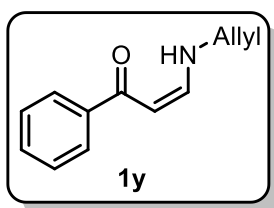

The synthetic method was followed the synthetic procedure of compound **1a**.

Flash chromatography: PE/EA (5:1)

The title compound was obtained as a brown liquid, Yield =62% (580 mg).

**<sup>1</sup>H NMR (500 MHz, CDCl<sub>3</sub>)** δ 10.33 (s, 1H), 7.87 (d, *J* = 7.5 Hz, 2H), 7.39 (dd, *J* = 7.1, 5.8 Hz, 3H), 6.94 – 6.76 (m, 1H), 5.90 – 5.77 (m, 1H), 5.75 – 5.61 (m, 1H), 5.28 – 5.19 (m, 1H), 5.19 – 5.11 (m, 1H), 3.80 (d, *J* = 1.7 Hz, 2H).

**<sup>13</sup>C NMR (126 MHz, CDCl<sub>3</sub>)** δ 190.0, 154.2, 139.7, 134.2, 130.9, 128.3, 127.1, 117.0, 90.7, 51.0.

**HRMS (ESI, *m/z*):** Calcd. for C<sub>12</sub>H<sub>14</sub>NO: [M+H]<sup>+</sup>, 188.1070. Found: *m/z* 188.1073.

**(Z)-1-phenyl-3-(phenylamino)prop-2-en-1-one (1z):**

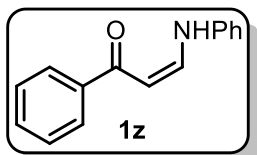

The synthetic method was followed the synthetic procedure of compound **1a**.

Flash chromatography: PE/EA (5:1)

The title compound was obtained as a brown solid, Yield = 94% (1.05 g), mp: 139.8-140.3 °C.

**<sup>1</sup>H NMR (400 MHz, CDCl<sub>3</sub>)** <sup>1</sup>H NMR (400 MHz, CDCl<sub>3</sub>) δ 12.16 (d, *J* = 11.3 Hz, 1H), 7.95 (dd, *J* = 7.8, 1.0 Hz, 2H), 7.60 – 7.42 (m, 4H), 7.35 (dd, *J* = 8.4, 7.5 Hz, 2H), 7.16 – 7.04 (m, 3H), 6.04 (d, *J* = 7.8 Hz, 1H).

**<sup>13</sup>C NMR (101 MHz, CDCl<sub>3</sub>)** δ 191.2, 145.2, 140.4, 139.4, 131.8, 130.0, 128.7, 127.5, 123.9, 116.6, 93.9.

**HRMS (ESI, *m/z*):** Calcd. for C<sub>15</sub>H<sub>14</sub>NO: [M+H]<sup>+</sup>, 224.1075. Found: *m/z* 224.1072.

**(Z)-3-((4-(tert-butyl)phenyl)amino)-1-phenylprop-2-en-1-one (1aa):**

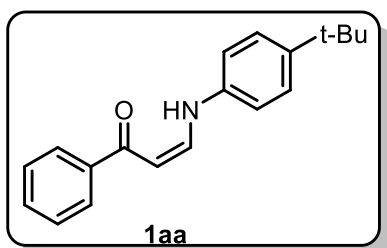

The synthetic method was followed the synthetic procedure of compound **1a**.

Flash chromatography: PE/EA (5:1)

The title compound was obtained as a brown solid, Yield =69% (963mg), mp: 139.8-140.3

°C.

**<sup>1</sup>H NMR (500 MHz, CDCl<sub>3</sub>)** δ 12.18 (d, *J* = 12.1 Hz, 1H), 7.98 – 7.92 (m, 2H), 7.54 – 7.48 (m, 2H), 7.48 – 7.43 (m, 2H), 7.39 – 7.35 (m, 2H), 7.06 (d, *J* = 8.7 Hz, 2H), 6.01 (d, *J* = 7.8 Hz, 1H), 1.33 (s, 9H).

**<sup>13</sup>C NMR (126 MHz, CDCl<sub>3</sub>)** δ 191.0, 147.1, 145.5, 139.5, 137.9, 131.7, 128.6, 127.5, 126.8, 116.3, 93.5, 34.6, 31.6.

**HRMS (ESI, *m/z*):** Calcd. for C<sub>19</sub>H<sub>22</sub>NO: [M+H]<sup>+</sup>, 280.1696. Found: *m/z* 280.1699.

**(*R,Z*)-1-phenyl-3-((1-phenylethyl)amino)prop-2-en-1-one (1ab):**

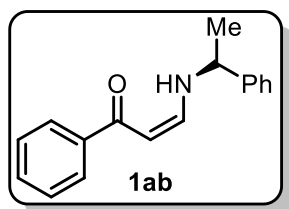

The synthetic method was followed the synthetic procedure of compound **1a**.

Flash chromatography: PE/EA (5:1)

The title compound was obtained as a brown oil, Yield = 38% (477 mg).

**<sup>1</sup>H NMR (400 MHz, CDCl<sub>3</sub>)** δ 10.70 (s, 1H), 7.91 (dd, *J* = 8.0, 1.6 Hz, 2H), 7.52 – 7.26 (m, 8H), 6.98 (dd, *J* = 12.8, 7.6 Hz, 1H), 5.76 (d, *J* = 7.6 Hz, 1H), 4.55 (p, *J* = 6.8 Hz, 1H), 1.65 (d, *J* = 6.9 Hz, 3H).

**<sup>13</sup>C NMR (101 MHz, CDCl<sub>3</sub>)** δ 190.2, 152.8, 143.3, 139.8, 131.1, 129.0, 128.4, 127.8, 127.2, 126.3, 90.8, 57.9, 23.8.

**HRMS (ESI, *m/z*):** Calcd. for C<sub>17</sub>H<sub>18</sub>NO: [M+H]<sup>+</sup>, 252.1388. Found: *m/z* 252.1385.

**Specific rotation:** [α] = -228.100

**(*Z*)-3-(methylamino)-1-phenylbut-2-en-1-one (1ac):**

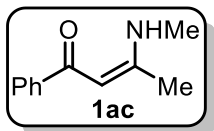

This compound was prepared according to the literature procedure<sup>5</sup>.

Flash chromatography: PE/EA (6:1)

The title compound was obtained as a brown solid, Yield = 65% (569 mg), mp: 74.4-75.1 °C.

**<sup>1</sup>H NMR (400 MHz, CDCl<sub>3</sub>)** <sup>1</sup>H NMR (400 MHz, CDCl<sub>3</sub>) δ 11.33 (s, 1H), 7.90 – 7.79 (m, 2H), 7.44 – 7.34 (m, 3H), 5.69 (s, 1H), 3.02 (d, *J* = 5.3 Hz, 3H), 2.06 (s, 3H).

**<sup>13</sup>C NMR (101 MHz, CDCl<sub>3</sub>)** δ 187.9, 166.2, 140.7, 130.6, 128.4, 127.1, 92.2, 29.9, 19.5.

**HRMS (ESI, *m/z*):** Calcd. for C<sub>11</sub>H<sub>14</sub>NO: [M+H]<sup>+</sup>, 176.1075. Found: *m/z* 176.1075.

**(Z)-1-(2-azaspiro[4.5]decan-3-ylidene)propan-2-one (1ad):**

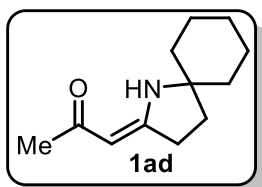

This compound was prepared according to the literature procedure in 1mmol scale<sup>6</sup>.

Flash chromatography: PE/EA (8:1)

The title compound was obtained as a brown solid, Yield = 70% (136 mg), mp: 110.2-111.0 °C.

**<sup>1</sup>H NMR (400 MHz, CDCl<sub>3</sub>)** δ 9.61 (s, 1H), 5.03 (s, 1H), 3.32 (s, 2H), 2.39 (s, 2H), 2.00 (s, 3H), 1.44 (d, *J* = 13.1 Hz, 10H).

**<sup>13</sup>C NMR (101 MHz, CDCl<sub>3</sub>)** δ 195.3, 167.2, 90.4, 40.7, 37.1, 36.3, 28.9, 26.0, 23.5, 23.1.

**HRMS (ESI, *m/z*):** Calcd. for C<sub>12</sub>H<sub>20</sub>NO: [M+H]<sup>+</sup>, 194.1545. Found: *m/z* 194.1544.

**(Z)-1-(piperidin-2-ylidene)propan-2-one (1ae):**

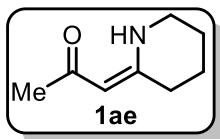

This compound was prepared according to the literature procedure in 1mmol scale<sup>6</sup>.

Flash chromatography: PE/EA (8:1)

The title compound was obtained as a brown oil, Yield = 73% (102 mg).

**<sup>1</sup>H NMR (400 MHz, CDCl<sub>3</sub>)** δ 11.06 (s, 1H), 4.85 (s, 1H), 3.30 – 3.33 (m, 2H), 2.31 – 2.35 (m, 2H), 1.97 (s, 3H), 1.65-1.79 (m, 4H).

**<sup>13</sup>C NMR (101 MHz, CDCl<sub>3</sub>)** δ 194.2, 164.4, 93.6, 41.2, 28.8, 28.6, 22.5, 19.5.

**HRMS (ESI, m/z):** Calcd. for C<sub>18</sub>H<sub>14</sub>NO: [M+H]<sup>+</sup>, 140.1075. Found: *m/z* 140.1078.

**(Z)-1-(azepan-2-ylidene)propan-2-one (1af):**

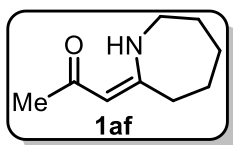

This compound was prepared according to the literature procedure in 1mmol scale<sup>6</sup>.

Flash chromatography: PE/EA (8:1)

The title compound was obtained as a brown oil, Yield = 75% (115 mg).

The title compound was obtained as a brown oil. **<sup>1</sup>H NMR (400 MHz, CDCl<sub>3</sub>)** δ 10.84 (s, 1H), 4.94 (s, 1H), 4.07 – 4.13 (m, 2H), 3.18 – 3.24 (m, 2H), 2.27-2.31 (m, 2H), 1.98 (s, 3H), 1.35-1.65 (m, 4H).

**<sup>13</sup>C NMR (101 MHz, CDCl<sub>3</sub>)** δ 195.4, 169.8, 94.2, 44.3, 34.9, 30.6, 29.5, 28.9, 25.9.

**HRMS (ESI, m/z):** Calcd. for C<sub>9</sub>H<sub>16</sub>NO: [M+H]<sup>+</sup>, 154.1232. Found: *m/z* 154.1232.

### **3. Optimization study**

To verify this idea, we started our investigations by using (Z)-3-(methylamino)-1-phenylprop-2-en-1-one **1a** and widely existed methyl acrylate **2** as the model substrates. Firstly, several solvents were examined by using [Cp\*RhCl<sub>2</sub>]<sub>2</sub> (2.0 mol%) as the catalyst precursor and Cu(OAc)<sub>2</sub> (2.0 equiv) as oxidant under nitrogen atmosphere at 100 °C for 12 h (Table S1, entries 2-5). To our delight, when methanol was used as the solvent, the 2-pyridone product **3a** was obtained in 45% yield (Table S1, entry 5). No desired product was detected in the absence of [Cp\*RhCl<sub>2</sub>]<sub>2</sub> catalyst (Table S1, entry 1). We then varied the temperature in the range of 70-100 °C and found that 90 °C was most suitable temperature for this reaction (Table S1, entries 5-7). The screening of additives showed that potassium acetate (KOAc) was more efficient as compared with other tested additives (Table S1, entries 8-10) and could greatly increase the yield of **3a** to 75% (Table S1, entry 10). Moreover, it was observed that the catalytic system of [Cp\*RhCl<sub>2</sub>]<sub>2</sub> (2.0 mol%) and silver salt (8.0 mol%) was more favorable to the formation of 2-pyridone **3a** (Table S1, entries 10-12). Therefore, [Cp\*RhCl<sub>2</sub>]<sub>2</sub> (2.0 mol%), AgOAc (8.0 mol%), Cu(OAc)<sub>2</sub> (2.0 equiv), and KOAc (2.0 equiv) in methanol at 90 °C under N<sub>2</sub> atmosphere for 12 h were identified as the optimal reaction conditions.

**Table S1.** Optimization study<sup>a,b</sup>



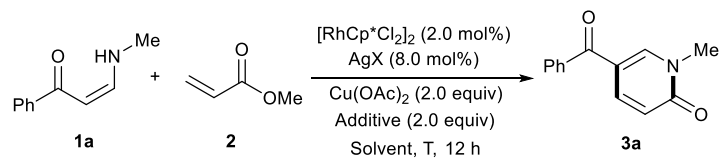

| Entry | AgX                | Additive | Solvent | T (°C) | Yield (%) <sup>b</sup> |
|-------|--------------------|----------|---------|--------|------------------------|
| 1     | —                  | —        | MeOH    | 100    | 0 <sup>c</sup>         |
| 2     | —                  | —        | DCE     | 100    | 28                     |
| 3     | —                  | —        | THF     | 100    | trace                  |
| 4     | —                  | —        | Toluene | 100    | trace                  |
| 5     | —                  | —        | MeOH    | 100    | 45                     |
| 6     | —                  | —        | MeOH    | 90     | 50                     |
| 7     | —                  | —        | MeOH    | 70     | 26                     |
| 8     | —                  | HOAc     | MeOH    | 90     | 47                     |
| 9     | —                  | PivOH    | MeOH    | 90     | 48                     |
| 10    | —                  | KOAc     | MeOH    | 90     | 75                     |
| 11    | AgOAc              | KOAc     | MeOH    | 90     | 81                     |
| 12    | AgSbF <sub>6</sub> | KOAc     | MeOH    | 90     | 78                     |

<sup>a</sup>Reaction conditions: enaminone **1a** (0.2 mmol, 1.0 equiv), methyl acrylate **2** (0.3 mmol, 1.5 equiv),  $\text{Cu}(\text{OAc})_2$  (0.4 mmol, 2.0 equiv), additive (0.4 mmol, 2.0 equiv), solvent (1.0 mL),  $[\text{Cp}^*\text{RhCl}_2]_2$  (2.0 mol%), AgX (8.0 mol%), 12 h. <sup>b</sup>Isolated yields. <sup>c</sup>Without  $[\text{Cp}^*\text{RhCl}_2]_2$ .

#### 4. General procedure and characterization for [3+3] annulation into 2-pyridones

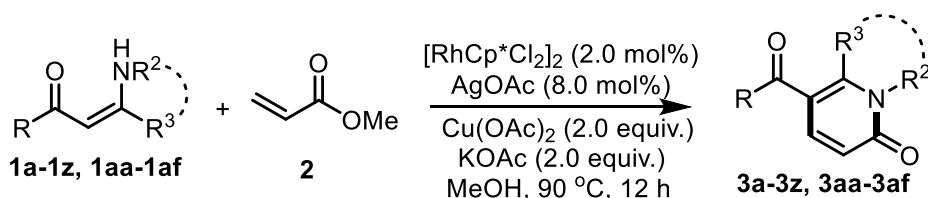

Typical procedure for [3+3] annulation into 2-pyridones: (*Z*)-3-(methylamino)-1-phenylprop-2-en-1-one **1a** and methyl acrylate **2** as the model substrates): To a 10 mL Schlenk flask equipped with magnetic stir bar was added (*Z*)-3-(methylamino)-1-phenylprop-2-en-1-one **1a** (0.2 mmol, 1.0 equiv),  $[\text{Cp}^*\text{RhCl}_2]_2$  (2.5 mg, 0.004 mmol), AgOAc (2.7 mg, 0.016 mmol, 0.08 equiv),  $\text{Cu}(\text{OAc})_2$  (72.6 mg, 0.4 mmol, 2.0 equiv), KOAc (39.3 mg, 0.4 mmol, 2.0 equiv). Then the mixture was evacuated and backfilled with N<sub>2</sub> three times. After that methyl acrylate (**2**, 25.8 mg, 0.30 mmol, 1.5 equiv) in MeOH (1.0 mL)

was injected into the test tube via syringe under N<sub>2</sub> atmosphere. The reaction mixture was allowed to stir at 90 °C for 12 h, during which time a constant checking by TLC was performed. Once the reaction proceeded to a desired degree, the resulting reaction mixture was mixed with a small amount of silica gel and concentrated. The crude product was purified by flash column chromatography on silica gel with PE/EtOAc as the eluent to afford the yellow solid **3a**.

### 5-benzoyl-1-methylpyridin-2(1H)-one (**3a**)

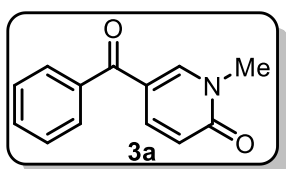

Flash chromatography: PE/EA (6:1)

This compound was prepared by the general procedure described above, affording the desired product **3a** as a yellow solid (34.5 mg, 81%). mp: 183.0-183.7 °C.

<sup>1</sup>H NMR (400 MHz, CDCl<sub>3</sub>) δ 7.98 (d, *J* = 2.3 Hz, 1H), 7.87 (d, *J* = 9.5 Hz, 1H), 7.67 (dd, *J* = 7.3, 0.8 Hz, 2H), 7.61 – 7.55 (m, 1H), 7.52 – 7.46 (m, 2H), 6.59 (d, *J* = 9.5 Hz, 1H), 3.59 (s, 3H).

<sup>13</sup>C NMR (101 MHz, CDCl<sub>3</sub>) δ 192.0, 162.9, 145.3, 139.5, 137.4, 132.5, 129.2, 128.8, 119.7, 117.5, 38.6.

HRMS (ESI, *m/z*): Calcd. for C<sub>13</sub>H<sub>12</sub>NO<sub>2</sub>: [M+H]<sup>+</sup>, 214.0868. Found: *m/z* 214.0867.

### 5-(2-fluorobenzoyl)-1-methylpyridin-2(1H)-one (**3b**):

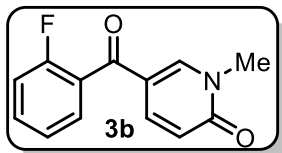

Flash chromatography: PE/EA (6:1)

This compound was prepared by the general procedure described above, affording the desired product **3b** as a yellow solid (20.8 mg, 45%). mp: 150.6-152.1 °C.

**<sup>1</sup>H NMR (400 MHz, CDCl<sub>3</sub>)** δ 7.96 (d, *J* = 1.7 Hz, 1H), 7.83 (ddd, *J* = 9.5, 2.6, 1.4 Hz, 1H), 7.57 – 7.47 (m, 2H), 7.29 (td, *J* = 7.6, 1.0 Hz, 1H), 7.21 – 7.14 (m, 1H), 6.58 (d, *J* = 9.6 Hz, 1H), 3.59 (s, 3H).

**<sup>13</sup>C NMR (101 MHz, CDCl<sub>3</sub>)** δ 188.4, 163.0, 159.6(d, *J* = 252.2 Hz), 145.6 (d, *J* = 2.1 Hz), 138.8 (d, *J* = 1.5 Hz), 133.5 (d, *J* = 8.3 Hz), 130.6 (d, *J* = 3.1 Hz), 126.2 (d, *J* = 15.5 Hz), 125.0 (d, *J* = 3.7 Hz), 119.8, 118.0 (d, *J* = 1.4 Hz), 116.6(d, *J* = 21.8 Hz), 38.7.

**<sup>19</sup>F NMR (471 MHz, CDCl<sub>3</sub>)** δ -112.02.

**HRMS (ESI, *m/z*):** Calcd. for C<sub>13</sub>H<sub>11</sub>FNO<sub>2</sub>: [M+H]<sup>+</sup>, 232.0774. Found: *m/z* 232.0778.

### 1-methyl-5-(2-methylbenzoyl)pyridin-2(1H)-one (**3c**):

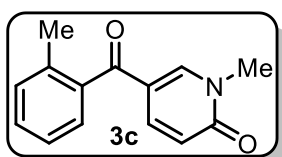

Flash chromatography: PE/EA (6:1)

This compound was prepared by the general procedure described above, affording the desired product **3c** as a yellow solid (19.5 mg, 43%). mp: 142.5-143.2 °C.

**<sup>1</sup>H NMR (400 MHz, CDCl<sub>3</sub>)** δ 7.94 – 7.77 (m, 2H), 7.38 (ddd, *J* = 7.9, 5.3, 3.7 Hz, 1H), 7.28 (d, *J* = 7.1 Hz, 1H), 7.25 (dd, *J* = 4.7, 1.2 Hz, 2H), 6.57 (d, *J* = 9.5 Hz, 1H), 3.53 (s, 3H),

2.31 (s, 3H).

$^{13}\text{C}$  NMR (101 MHz,  $\text{CDCl}_3$ )  $\delta$  193.7, 163.0, 145.8, 138.8, 137.7, 136.5, 131.5, 130.6, 127.7, 125.7, 119.9, 118.2, 38.6, 19.8.

HRMS (ESI,  $m/z$ ): Calcd. for  $\text{C}_{14}\text{H}_{14}\text{NO}_2$ :  $[\text{M}+\text{H}]^+$ , 228.1025. Found:  $m/z$  228.1024.

### 5-(2-methoxybenzoyl)-1-methylpyridin-2(1H)-one (3d):

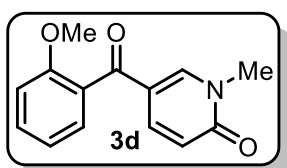

Flash chromatography: PE/EA (6:1)

This compound was prepared by the general procedure described above, affording the desired product **3d** as a yellow solid (24.3 mg, 50%). mp: 135.6-137.1 °C.

$^1\text{H}$  NMR (400 MHz,  $\text{CDCl}_3$ )  $\delta$  7.91 (d,  $J = 2.5$  Hz, 1H), 7.76 (dd,  $J = 9.5, 2.6$  Hz, 1H), 7.46 (ddd,  $J = 8.4, 7.5, 1.8$  Hz, 1H), 7.31 (dd,  $J = 7.5, 1.7$  Hz, 1H), 7.04 (td,  $J = 7.5, 0.8$  Hz, 1H), 6.98 (d,  $J = 8.4$  Hz, 1H), 6.52 (d,  $J = 9.5$  Hz, 1H), 3.77 (s, 3H), 3.55 (s, 3H).

$^{13}\text{C}$  NMR (101 MHz,  $\text{CDCl}_3$ )  $\delta$  191.6, 163.1, 156.9, 145.2, 139.2, 132.4, 129.5, 127.8, 121.1, 119.3, 118.4, 111.6, 55.8, 38.6.

HRMS (ESI,  $m/z$ ): Calcd. for  $\text{C}_{14}\text{H}_{14}\text{NO}_3$ :  $[\text{M}+\text{H}]^+$ , 244.0974. Found:  $m/z$  244.0974.

### 5-(3-fluorobenzoyl)-1-methylpyridin-2(1H)-one (3e):

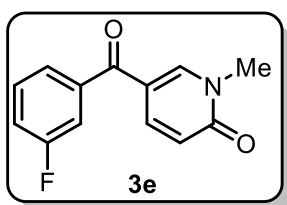

Flash chromatography: PE/EA (5:1)

This compound was prepared by the general procedure described above, affording the desired product **3e** as a yellow solid (21.3 mg, 46%). mp: 162.2-163.8 °C.

**<sup>1</sup>H NMR (400 MHz, CDCl<sub>3</sub>)** δ 8.02 (s, 1H), 7.87 (d, *J* = 9.4 Hz, 1H), 7.48 (dd, *J* = 12.4, 7.5 Hz, 2H), 7.40 (d, *J* = 8.6 Hz, 1H), 7.31 (d, *J* = 8.8 Hz, 1H), 6.61 (d, *J* = 9.5 Hz, 1H), 3.62 (s, 3H).

**<sup>13</sup>C NMR (101 MHz, CDCl<sub>3</sub>)** δ 190.5 (d, *J* = 2.3 Hz), 162.8, 162.7(d, *J* = 250.3 Hz), 145.5, 139.4 (d, *J* = 6.4 Hz), 139.2, 130.6 (d, *J* = 7.9 Hz), 124.9 (d, *J* = 3.2 Hz), 119.9, 119.5(d, *J* = 21.4 Hz), 117.0, 116.1(d, *J* = 22.6 Hz), 38.7.

**<sup>19</sup>F NMR (471 MHz, CDCl<sub>3</sub>)** δ -111.08.

**HRMS (ESI, *m/z*):** Calcd. for C<sub>13</sub>H<sub>11</sub>F NO<sub>2</sub>: [M+H]<sup>+</sup>, 232.0774. Found: *m/z* 232.0773.

#### 1-methyl-5-(3-methylbenzoyl)pyridin-2(1H)-one (**3f**):

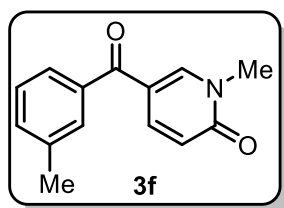

Flash chromatography: PE/EA (6:1)

This compound was prepared by the general procedure described above, affording the desired product **3f** as a yellow solid (30.9 mg, 68%). mp: 147.6-149.2 °C.

**<sup>1</sup>H NMR (400 MHz, CDCl<sub>3</sub>)** δ 7.98 (d, *J* = 2.4 Hz, 1H), 7.86 (dd, *J* = 9.5, 2.5 Hz, 1H), 7.49 (s, 1H), 7.44 (d, *J* = 6.9 Hz, 1H), 7.41 – 7.33 (m, 2H), 6.58 (d, *J* = 9.5 Hz, 1H), 3.58 (s, 3H), 2.42 (s, 3H).

**<sup>13</sup>C NMR (101 MHz, CDCl<sub>3</sub>)** δ 192.2, 162.9, 145.2, 139.53, 138.9, 137.5, 133.3, 129.7, 128.6, 126.4, 119.7, 117.6, 38.6, 21.6.

**HRMS (ESI, m/z):** Calcd. for C<sub>14</sub>H<sub>14</sub>NO<sub>2</sub>: [M+H]<sup>+</sup>, 228.1025. Found: *m/z* 228.1025.

**5-(3-methoxybenzoyl)-1-methylpyridin-2(1H)-one (3g):**

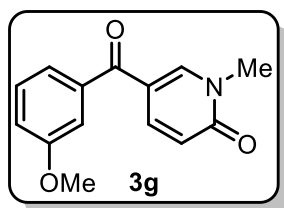

Flash chromatography: PE/EA (5:1)

This compound was prepared by the general procedure described above, affording the desired product **3g** as a yellow solid (39.9 mg, 82%). mp: 133.7-134.5 °C.

**<sup>1</sup>H NMR (400 MHz, CDCl<sub>3</sub>)** <sup>1</sup>H NMR (400 MHz, CDCl<sub>3</sub>) δ 7.99 (d, *J* = 2.5 Hz, 1H), 7.86 (dd, *J* = 9.5, 2.6 Hz, 1H), 7.38 (t, *J* = 8.1 Hz, 1H), 7.22 – 7.15 (m, 2H), 7.13 – 7.07 (m, 1H), 6.57 (d, *J* = 9.5 Hz, 1H), 3.84 (s, 3H), 3.58 (s, 3H).

**<sup>13</sup>C NMR (101 MHz, CDCl<sub>3</sub>)** δ 191.7, 162.9, 160.0, 145.3, 139.4, 138.8, 129.8, 121.6, 119.7, 118.6, 117.5, 114.0, 55.7, 38.6.

**HRMS (ESI, m/z):** Calcd. for C<sub>14</sub>H<sub>14</sub>NO<sub>3</sub>: [M+H]<sup>+</sup>, 244.0974. Found: *m/z* 244.0977.

**5-(4-fluorobenzoyl)-1-methylpyridin-2(1H)-one (3h):**

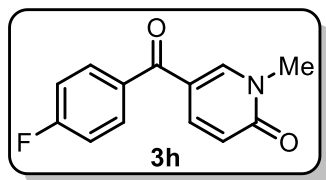

Flash chromatography: PE/EA (5:1)

This compound was prepared by the general procedure described above, affording the desired product **3h** as a yellow solid (29.1 mg, 63%). mp: 182.7-184.2 °C.

**<sup>1</sup>H NMR (400 MHz, CDCl<sub>3</sub>)** δ 7.98 (d, *J* = 2.5 Hz, 1H), 7.83 (dd, *J* = 9.5, 2.6 Hz, 1H), 7.76

– 7.69 (m, 2H), 7.22 – 7.14 (m, 2H), 6.59 (d,  $J = 9.5$  Hz, 1H), 3.60 (s, 3H).

$^{13}\text{C}$  NMR (101 MHz,  $\text{CDCl}_3$ )  $\delta$  190.6, 165.4(d,  $J = 254.8$  Hz), 162.9, 145.1, 139.4, 133.7 (d,  $J = 3.3$  Hz), 131.8 (d,  $J = 9.1$  Hz), 119.8, 117.4, 116.1(d,  $J = 22.0$  Hz), 38.7.

$^{19}\text{F}$  NMR (471 MHz,  $\text{CDCl}_3$ )  $\delta$  -105.79.

HRMS (ESI,  $m/z$ ): Calcd. for  $\text{C}_{13}\text{H}_{11}\text{FNO}_2$ :  $[\text{M}+\text{H}]^+$ , 232.0774. Found:  $m/z$  232.0777.

### 5-(4-chlorobenzoyl)-1-methylpyridin-2(1H)-one (3i):

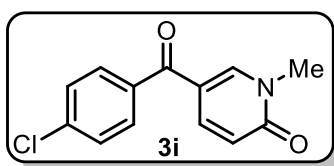

Flash chromatography: PE/EA (5:1)

This compound was prepared by the general procedure described above, affording the desired product **3i** as a yellow solid (38.5 mg, 78%). mp: 187.9-189.3 °C.

$^1\text{H}$  NMR (400 MHz,  $\text{CDCl}_3$ )  $\delta$  7.96 (d,  $J = 2.5$  Hz, 1H), 7.81 (dd,  $J = 9.5, 2.6$  Hz, 1H), 7.65 – 7.59 (m, 2H), 7.48 – 7.43 (m, 2H), 6.57 (d,  $J = 9.5$  Hz, 1H), 3.58 (s, 3H).

$^{13}\text{C}$  NMR (101 MHz,  $\text{CDCl}_3$ )  $\delta$  190.7, 162.8, 145.2, 139.2, 138.9, 135.7, 130.6, 129.1, 119.9, 117.2, 38.7.

HRMS (ESI,  $m/z$ ): Calcd. for  $\text{C}_{13}\text{H}_{11}\text{NO}_2\text{Cl}$ :  $[\text{M}+\text{H}]^+$ , 248.0478. Found:  $m/z$  248.0480.

### 5-(4-bromobenzoyl)-1-methylpyridin-2(1H)-one (3j):

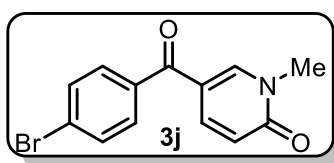

Flash chromatography: PE/EA (4:1)

This compound was prepared by the general procedure described above, affording the desired product **3j** as a yellow solid (41.9 mg, 72%). mp: 191.0-191.6 °C.

**<sup>1</sup>H NMR (400 MHz, CDCl<sub>3</sub>)** δ 7.96 (d, *J* = 2.5 Hz, 1H), 7.82 (dd, *J* = 9.5, 2.6 Hz, 1H), 7.66 – 7.60 (m, 2H), 7.57 – 7.52 (m, 2H), 6.58 (d, *J* = 9.5 Hz, 1H), 3.59 (s, 3H).

**<sup>13</sup>C NMR (101 MHz, CDCl<sub>3</sub>)** δ 190.9, 162.8, 145.3, 139.2, 136.2, 132.2, 130.8, 127.5, 119.9, 117.2, 38.7.

**HRMS (ESI, *m/z*):** Calcd. for C<sub>13</sub>H<sub>11</sub> NO<sub>2</sub>Br: [M+H]<sup>+</sup>, 291.9973. Found: *m/z* 291.9975.

### 1-methyl-5-(4-methylbenzoyl)pyridin-2(1H)-one (**3k**):

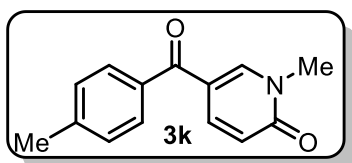

Flash chromatography: PE/EA (4:1)

This compound was prepared by the general procedure described above, affording the desired product **3k** as a yellow solid (41.3 mg, 91%). mp: 185.6-186.7 °C.

**<sup>1</sup>H NMR (400 MHz, CDCl<sub>3</sub>)** δ 7.97 (d, *J* = 2.4 Hz, 1H), 7.85 (dd, *J* = 9.5, 2.5 Hz, 1H), 7.59 (d, *J* = 8.1 Hz, 2H), 7.28 (d, *J* = 7.9 Hz, 2H), 6.57 (d, *J* = 9.5 Hz, 1H), 3.58 (s, 3H), 2.43 (s, 3H).

**<sup>13</sup>C NMR (101 MHz, CDCl<sub>3</sub>)** δ 191.8, 145.0, 143.4, 139.6, 134.7, 129.5, 119.7, 117.7, 38.6, 21.8.

**HRMS (ESI, *m/z*):** Calcd. for C<sub>14</sub>H<sub>14</sub> NO<sub>2</sub>: [M+H]<sup>+</sup>, 228.1025. Found: *m/z* 228.1027.

### 5-(4-methoxybenzoyl)-1-methylpyridin-2(1H)-one (**3l**):



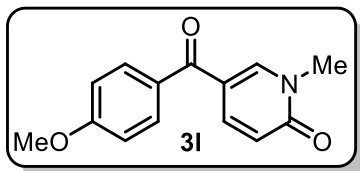

Flash chromatography: PE/EA (3:1)

This compound was prepared by the general procedure described above, affording the desired product **3l** as a yellow solid (36.5 mg, 75%). mp: 182.7-183.3 °C.

**<sup>1</sup>H NMR (400 MHz, CDCl<sub>3</sub>)** δ 7.96 (d, *J* = 2.5 Hz, 1H), 7.81 (dd, *J* = 9.5, 2.6 Hz, 1H), 7.72 – 7.66 (m, 2H), 7.00 – 6.92 (m, 2H), 6.56 (d, *J* = 9.5 Hz, 1H), 3.87 (s, 3H), 3.58 (s, 3H).

**<sup>13</sup>C NMR (101 MHz, CDCl<sub>3</sub>)** δ 190.8, 163.3, 162.9, 144.6, 139.7, 131.7, 129.8, 119.6, 117.9, 114.0, 55.7, 38.6.

**HRMS (ESI, *m/z*):** Calcd. for C<sub>14</sub>H<sub>14</sub>NO<sub>3</sub>: [M+H]<sup>+</sup>, 244.0974. Found: *m/z* 244.0975.

### 1-methyl-5-(4-(trifluoromethyl)benzoyl)pyridin-2(1H)-one (**3m**):

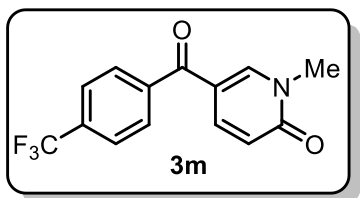

Flash chromatography: PE/EA (3:1)

This compound was prepared by the general procedure described above, affording the desired product **3m** as a yellow solid (26.4 mg, 47%). mp: 173.7-175.3°C.

**<sup>1</sup>H NMR (500 MHz, CDCl<sub>3</sub>)** δ 7.97 (d, *J* = 2.5 Hz, 1H), 7.82 (dt, *J* = 9.5, 2.5 Hz, 1H), 7.78 – 7.70 (m, 4H), 6.56 (dd, *J* = 9.5, 4.1 Hz, 1H).

**<sup>13</sup>C NMR (126 MHz, CDCl<sub>3</sub>)** δ 190.7, 162.7, 145.7, 140.7, 138.9, 133.8(d, *J* = 33.0 Hz), 129.4, 125.9(q, *J* = 3.7 Hz), 123.7 (d, *J* = 273.2 Hz), 120.0, 116.9, 38.6.

**<sup>19</sup>F NMR (471 MHz, CDCl<sub>3</sub>)** δ -63.04.

**HRMS (ESI, m/z):** Calcd. for C<sub>14</sub>H<sub>11</sub>NO<sub>2</sub>F<sub>3</sub>: [M+H]<sup>+</sup>, 282.0736. Found: *m/z* 282.0740.

**Methyl 4-(1-methyl-6-oxo-1,6-dihydropyridine-3-carbonyl)benzoate (3n):**

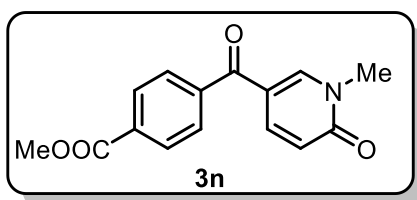

Flash chromatography: PE/EA (3:1)

This compound was prepared by the general procedure described above, affording the desired product **3n** as a yellow solid (30.4 mg, 56%). mp: 171.3-173.0 °C.

**<sup>1</sup>H NMR (500 MHz, CDCl<sub>3</sub>)** δ 8.23 – 8.10 (m, 2H), 7.96 (d, *J* = 2.2 Hz, 1H), 7.85 (ddd, *J* = 9.5, 4.7, 2.6 Hz, 1H), 7.71 (dd, *J* = 8.2, 4.7 Hz, 2H), 6.59 (dd, *J* = 9.5, 6.5 Hz, 1H), 3.95 (s, 3H), 3.58 (s, 3H).

**<sup>13</sup>C NMR (126 MHz, CDCl<sub>3</sub>)** δ 191.2, 166.3, 162.8, 145.6, 141.3, 139.1, 133.4, 130.0, 129.0, 120.0, 117.1, 52.8, 38.7

**HRMS (ESI, m/z):** Calcd. for C<sub>15</sub>H<sub>14</sub>NO<sub>4</sub>: [M+H]<sup>+</sup>, 272.0916. Found: *m/z* 272.0921.

**Tert-butyl (4-(1-methyl-6-oxo-1,6-dihydropyridine-3-carbonyl)phenyl)carbamate**

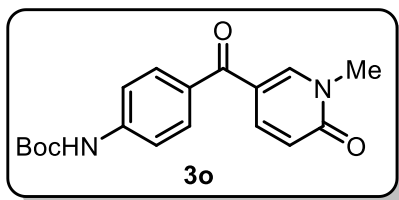

Flash chromatography: PE/EA (3:1)

This compound was prepared by the general procedure described above, affording the desired product **3o** as a yellow viscous liquid (13.8 mg, 21%).

**<sup>1</sup>H NMR (500 MHz, CDCl<sub>3</sub>)** δ 7.96 (d, *J* = 2.5 Hz, 1H), 7.84 (dd, *J* = 9.5, 2.5 Hz, 1H), 7.68 – 7.64 (m, 2H), 7.51 (d, *J* = 8.6 Hz, 2H), 7.09 (s, 1H), 6.59 (d, *J* = 9.5 Hz, 1H), 3.59 (s, 3H), 1.51 (s, 9H).

**<sup>13</sup>C NMR (126 MHz, CDCl<sub>3</sub>)** δ 190.8, 163.0, 152.6, 144.8, 142.9, 139.7, 131.5, 130.9, 119.7, 117.9, 81.5, 38.6, 28.5.

**HRMS (ESI, *m/z*):** Calcd. for C<sub>18</sub>H<sub>21</sub>N<sub>2</sub>O<sub>4</sub>: [M+H]<sup>+</sup>, 329.1496. Found: *m/z* 329.1488.

**5-(2-naphthoyl)-1-methylpyridin-2(1H)-one (3p):**

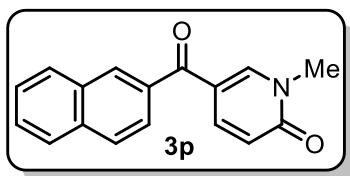

Flash chromatography: PE/EA (5:1)

This compound was prepared by the general procedure described above, affording the desired product **3m** as a yellow solid (47.9 mg, 91%). mp: 128.3-128.9 °C.

**<sup>1</sup>H NMR (400 MHz, CDCl<sub>3</sub>)** δ 8.16 (s, 1H), 8.04 (d, *J* = 2.5 Hz, 1H), 7.97 – 7.89 (m, 4H), 7.77 (dd, *J* = 8.5, 1.7 Hz, 1H), 7.59 (dtd, *J* = 14.6, 6.9, 1.3 Hz, 2H), 6.61 (d, *J* = 9.5 Hz, 1H), 3.58 (s, 3H).

**<sup>13</sup>C NMR (101 MHz, CDCl<sub>3</sub>)** δ 192.0, 162.9, 145.3, 139.5, 135.3, 134.7, 132.4, 130.3, 129.4, 128.9, 128.6, 128.1, 127.3, 125.4, 119.8, 117.7, 38.6.

**HRMS (ESI, *m/z*):** Calcd. for C<sub>17</sub>H<sub>14</sub>NO<sub>2</sub>: [M+H]<sup>+</sup>, 262.1025. Found: *m/z* 264.1026.

**5-(furan-2-carbonyl)-1-methylpyridin-2(1H)-one (3q):**

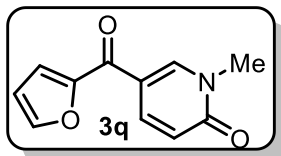

Flash chromatography: PE/EA (5:1)

This compound was prepared by the general procedure described above, affording the desired product **3n** as a yellow solid (19.1 mg, 47%). mp: 190.8-191.5 °C.

**<sup>1</sup>H NMR (400 MHz, CDCl<sub>3</sub>)** δ 8.46 (d, *J* = 2.5 Hz, 1H), 8.06 (dd, *J* = 9.6, 2.6 Hz, 1H), 7.64 (d, *J* = 0.9 Hz, 1H), 7.30 (d, *J* = 3.2 Hz, 1H), 6.63 – 6.53 (m, 2H), 3.62 (s, 3H).

**<sup>13</sup>C NMR (101 MHz, CDCl<sub>3</sub>)** δ 176.7, 162.9, 152.7, 146.5, 144.9, 139.1, 119.7, 119.5, 116.8, 112.7, 38.7.

**HRMS (ESI, *m/z*):** Calcd. for C<sub>11</sub>H<sub>10</sub>NO<sub>3</sub>: [M+H]<sup>+</sup>, 204.0661. Found: *m/z* 204.0661.

### 1-methyl-5-(thiophene-2-carbonyl)pyridin-2(1H)-one (**3r**):

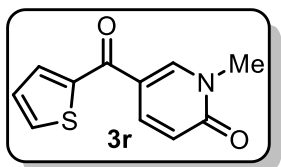

Flash chromatography: PE/EA (5:1)

This compound was prepared by the general procedure described above, affording the desired product **3o** as a yellow solid (29.8 mg, 68%). mp: 174.2-175.1 °C.

**<sup>1</sup>H NMR (400 MHz, CDCl<sub>3</sub>)** δ 8.12 (d, *J* = 2.5 Hz, 1H), 7.89 (dd, *J* = 9.5, 2.6 Hz, 1H), 7.69 (dd, *J* = 5.0, 1.0 Hz, 1H), 7.60 (dd, *J* = 3.8, 1.0 Hz, 1H), 7.15 (dd, *J* = 4.9, 3.8 Hz, 1H), 6.57 (d, *J* = 9.5 Hz, 1H), 3.60 (s, 3H).

**<sup>13</sup>C NMR (101 MHz, CDCl<sub>3</sub>)** δ 182.9, 162.9, 144.1, 142.5, 139.1, 134.0, 133.3, 128.2, 119.8, 117.8, 38.6.

**HRMS (ESI, m/z):** Calcd. for C<sub>11</sub>H<sub>10</sub>NO<sub>2</sub>S: [M+H]<sup>+</sup>, 220.0432. Found: *m/z* 220.0432.

**5-(Ferrocene-carbonyl)-1-methylpyridin-2(1H)-one (3s):**

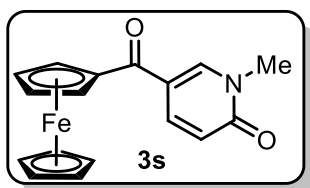

Flash chromatography: PE/EA (5:1)

This compound was prepared by the general procedure described above, affording the desired product **3p** as a yellow solid (25.7 mg, 40%). mp: 170.5-171.2 °C.

**<sup>1</sup>H NMR (400 MHz, CDCl<sub>3</sub>)** δ 8.18 (d, *J* = 2.4 Hz, 1H), 8.02 (dd, *J* = 9.5, 2.5 Hz, 1H), 6.56 (d, *J* = 9.5 Hz, 1H), 4.83 – 4.78 (m, 2H), 4.59 – 4.53 (m, 2H), 4.19 (s, 5H), 3.61 (s, 3H).

**<sup>13</sup>C NMR (101 MHz, CDCl<sub>3</sub>)** δ 193.3, 163.0, 142.7, 138.9, 119.4, 119.1, 78.3, 72.6, 71.3, 70.4, 38.6.

**HRMS (ESI, m/z):** Calcd. for C<sub>17</sub>H<sub>16</sub>NO<sub>2</sub>Fe: [M+H]<sup>+</sup>, 320.0577. Found: *m/z* 320.0569.

**1-methyl-5-octanoylpyridin-2(1H)-one (3t):**

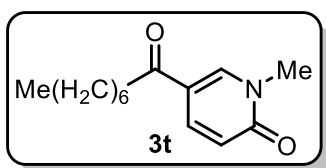

Flash chromatography: PE/EA (5:1)

This compound was prepared by the general procedure described above, affording the desired product **3q** as a yellow solid (26.3 mg, 56%). mp: 188.2-189.5 °C.

**<sup>1</sup>H NMR (400 MHz, CDCl<sub>3</sub>)** δ 8.16 (s, 1H), 7.90 (d, *J* = 8.7 Hz, 1H), 7.53 – 7.34 (m, 1H), 6.71 (d, *J* = 14.6 Hz, 1H), 6.67 – 6.59 (m, 1H), 6.55 (d, *J* = 9.3 Hz, 1H), 6.35 – 6.23 (m, 1H),

6.23 – 6.10 (m, 1H), 5.99 (dd,  $J = 14.3, 6.9$  Hz, 1H), 3.61 (s, 3H), 1.83 (d,  $J = 5.8$  Hz, 3H).

$^{13}\text{C}$  NMR (101 MHz,  $\text{CDCl}_3$ )  $\delta$  185.2, 163.1, 145.5, 143.6, 143.2, 138.2, 136.7, 131.6, 128.2, 122.3, 119.8, 118.7, 38.7, 18.9.

HRMS (ESI,  $m/z$ ): Calcd. for  $\text{C}_{14}\text{H}_{16}\text{NO}_2$ :  $[\text{M}+\text{H}]^+$ , 230.1181. Found:  $m/z$  230.1180.

### 5-acetyl-1-methylpyridin-2(1H)-one (3u):

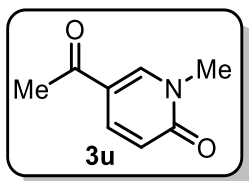

Flash chromatography: PE/EA (5:1)

This compound was prepared by the general procedure described above, affording the desired product **3r** as yellow solid (19.9 mg, 66%). mp: 146.9-147.3 °C.

$^1\text{H}$  NMR (400 MHz,  $\text{CDCl}_3$ )  $\delta$  8.12 (d,  $J = 3.0$  Hz, 1H), 7.85 (dd,  $J = 9.7, 2.8$  Hz, 1H), 6.54 (d,  $J = 9.8$  Hz, 1H), 3.60 (s, 3H), 2.44 (s, 3H).

$^{13}\text{C}$  NMR (101 MHz,  $\text{CDCl}_3$ )  $\delta$  193.3, 163.0, 143.4, 138.0, 119.8, 117.9, 38.6, 26.0.

HRMS (ESI,  $m/z$ ): Calcd. for  $\text{C}_8\text{H}_{10}\text{NO}_2$ :  $[\text{M}+\text{H}]^+$ , 152.0712. Found:  $m/z$  152.0713.

(3*S*,8*R*,9*S*,10*R*,13*S*,14*S*)-10,13-dimethyl-17-(1-methyl-6-oxo-1,6-dihydropyridine-3-carbonyl)-2,3,4,7,8,9,10, 11,12,13,14,15-dodecahydro-1*H*-cyclopenta[*a*]phenanthren-3-yl acetate (3v):

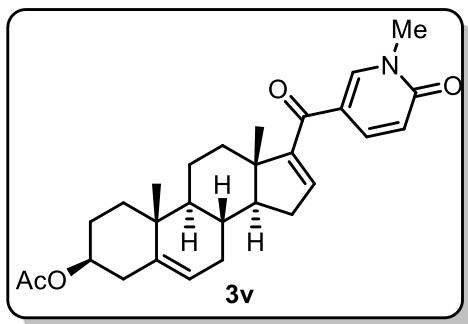

Flash chromatography: PE/EA (5:1)

This compound was prepared by the general procedure described above, affording the desired product **3s** as a yellow solid (43.1 mg, 48%). mp: 262.0-263.2 °C.

**<sup>1</sup>H NMR (400 MHz, CDCl<sub>3</sub>)** δ 7.93 (d, *J* = 2.1 Hz, 1H), 7.80 (dd, *J* = 9.5, 2.3 Hz, 1H), 6.55 (d, *J* = 9.5 Hz, 1H), 6.37 (s, 1H), 5.39 (d, *J* = 4.5 Hz, 1H), 4.59 (dt, *J* = 10.4, 5.9 Hz, 1H), 3.59 (s, 3H), 2.45 – 2.29 (m, 3H), 2.22 – 2.03 (m, 3H), 2.03 (s, 3H), 1.86 (d, *J* = 10.1 Hz, 2H), 1.78 – 1.68 (m, 2H), 1.67 – 1.48 (m, 5H), 1.33 (td, *J* = 11.9, 6.2 Hz, 1H), 1.20 – 1.11 (m, 1H), 1.08 (d, *J* = 9.2 Hz, 6H).

**<sup>13</sup>C NMR (101 MHz, CDCl<sub>3</sub>)** δ 189.3, 170.8, 163.2, 153.2, 143.5, 140.5, 139.0, 122.2, 119.7, 119.2, 74.0, 56.5, 50.7, 48.0, 38.6, 38.3, 37.1, 37.0, 34.2, 33.1, 31.8, 30.3, 27.9, 21.7, 20.8, 19.5, 16.4.

**HRMS (ESI, *m/z*):** Calcd. for C<sub>28</sub>H<sub>36</sub>NO<sub>4</sub>: [M+H]<sup>+</sup>, 450.2644. Found: *m/z* 450.2649.

**Specific rotation:** [α] = -90.800

**5-benzoyl-1-benzylpyridin-2(1H)-one (3w):**

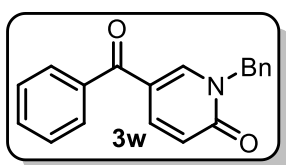

Flash chromatography: PE/EA (5:1)

This compound was prepared by the general procedure described above, affording the desired product **3u** as a yellow solid (35.3 mg, 61%). mp: 131.6-132.2 °C.

**<sup>1</sup>H NMR (400 MHz, CDCl<sub>3</sub>)** <sup>1</sup>H NMR (400 MHz, CDCl<sub>3</sub>) δ 7.97 (d, *J* = 1.7 Hz, 1H), 7.86 (dd, *J* = 9.4, 2.0 Hz, 1H), 7.56 (dd, *J* = 17.2, 7.4 Hz, 3H), 7.43 (t, *J* = 7.5 Hz, 2H), 7.38 – 7.25 (m, 5H), 6.63 (d, *J* = 9.5 Hz, 1H), 5.15 (s, 2H).

**<sup>13</sup>C NMR (101 MHz, CDCl<sub>3</sub>)** δ 191.8, 162.4, 144.4, 139.2, 137.2, 135.5, 132.5, 129.3, 128.7, 128.7, 128.5, 120.3, 117.6, 52.8.

**HRMS (ESI, *m/z*):** Calcd. for C<sub>19</sub>H<sub>16</sub>NO<sub>2</sub>: [M+H]<sup>+</sup>, 290.1181. Found: *m/z* 290.1184.

#### 5-benzoyl-1-(2,2,2-trifluoroethyl)pyridin-2(1H)-one (**3x**):

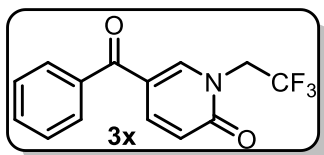

Flash chromatography: PE/EA (5:1)

This compound was prepared by the general procedure described above, affording the desired product **3v** as a yellow solid (33.7 mg, 60%). mp: 129.6-130.3 °C.

**<sup>1</sup>H NMR (400 MHz, CDCl<sub>3</sub>)** δ 7.92 (q, *J* = 2.5 Hz, 1H), 7.69 (dd, *J* = 7.0, 1.4 Hz, 1H), 7.61 (t, *J* = 7.4 Hz, 1H), 7.50 (t, *J* = 7.5 Hz, 1H), 6.67 (d, *J* = 10.4 Hz, 1H), 4.64 (q, *J* = 8.5 Hz, 1H).

**<sup>13</sup>C NMR (101 MHz, CDCl<sub>3</sub>)** δ 191.5, 161.6, 144.3, 140.1, 137.0, 133.0, 129.4, 129.0, 126.2(d, *J* = 281.5 Hz), 120.9, 118.3, 48.3(q, *J* = 35.35 Hz).

**<sup>19</sup>F NMR (471 MHz, CDCl<sub>3</sub>)** δ -64.95.

**HRMS (ESI, *m/z*):** Calcd. for C<sub>14</sub>H<sub>11</sub> NO<sub>2</sub>F<sub>3</sub>: [M+H]<sup>+</sup>, 282.0742. Found: *m/z* 282.0740.



### 1-allyl-5-benzoylpyridin-2(1H)-one (**3y**):

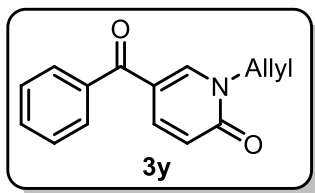

Flash chromatography: PE/EA (5:1)

This compound was prepared by the general procedure described above, affording the desired product **3y** as a yellow solid (13.8 mg, 37%).

**<sup>1</sup>H NMR (500 MHz, CDCl<sub>3</sub>)** δ 7.93 (d, *J* = 2.5 Hz, 1H), 7.82 (dd, *J* = 9.5, 2.6 Hz, 1H), 7.63 (dd, *J* = 8.2, 1.3 Hz, 2H), 7.58 – 7.51 (m, 1H), 7.45 (dd, *J* = 10.7, 4.5 Hz, 2H), 6.56 (d, *J* = 9.5 Hz, 1H), 5.26 (dd, *J* = 10.3, 1.0 Hz, 1H), 5.21 – 5.12 (m, 1H), 4.55 (dt, *J* = 5.9, 1.4 Hz, 2H).

**<sup>13</sup>C NMR (126 MHz, CDCl<sub>3</sub>)** δ 191.8, 162.0, 144.1, 139.3, 137.3, 132.5, 131.8, 129.2, 128.7, 120.0, 119.6, 117.5, 51.8.

**HRMS (ESI, *m/z*):** Calcd. for C<sub>15</sub>H<sub>14</sub>NO<sub>2</sub>: [M+H]<sup>+</sup>, 240.1019. Found: *m/z* 240.1027.

### 5-benzoyl-1-phenylpyridin-2(1H)-one (**3z**):

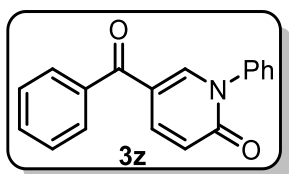

Flash chromatography: PE/EA (5:1)

This compound was prepared by the general procedure described above, affording the desired product **3t** as a yellow solid (28.6 mg, 52%). mp: 125.5-126.3 °C.

**<sup>1</sup>H NMR (400 MHz, CDCl<sub>3</sub>)** δ 8.03 – 7.93 (m, 2H), 7.73 – 7.68 (m, 2H), 7.57 (t, *J* = 7.4 Hz, 1H), 7.52 – 7.43 (m, 5H), 7.40 – 7.34 (m, 2H), 6.70 (d, *J* = 9.6 Hz, 1H).

$^{13}\text{C}$  NMR (101 MHz,  $\text{CDCl}_3$ )  $\delta$  191.9, 162.1, 144.9, 140.2, 139.6, 137.3, 132.6, 129.7, 129.3, 129.2, 128.8, 126.6, 121.0, 117.6.

HRMS (ESI,  $m/z$ ): Calcd. for  $\text{C}_{18}\text{H}_{14}\text{NO}_2$ :  $[\text{M}+\text{H}]^+$ , 276.1025. Found:  $m/z$  276.1024.

### 5-benzoyl-1-(4-(tert-butyl)phenyl)pyridin-2(1H)-one

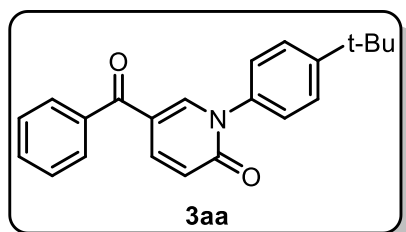

Flash chromatography: PE/EA (5:1)

This compound was prepared by the general procedure described above, affording the desired product **3aa** as a yellow solid (39.1 mg, 59%). mp: 177.1-179.7 °C.

$^1\text{H}$  NMR (500 MHz,  $\text{CDCl}_3$ )  $\delta$  8.04 – 7.99 (m, 1H), 7.96 (dd,  $J = 9.6, 2.6$  Hz, 1H), 7.71 (d,  $J = 7.8$  Hz, 2H), 7.59 – 7.52 (m, 1H), 7.48 (ddd,  $J = 15.2, 7.0, 1.7$  Hz, 4H), 7.29 (t,  $J = 8.8$  Hz, 2H), 6.69 (d,  $J = 9.6$  Hz, 1H), 1.33 (s, 9H).

$^{13}\text{C}$  NMR (126 MHz,  $\text{CDCl}_3$ )  $\delta$  191.9, 162.2, 152.3, 145.1, 139.4, 137.6, 137.4, 132.5, 129.2, 128.8, 126.7, 126.0, 121.0, 117.5, 34.9, 31.4.

HRMS (ESI,  $m/z$ ): Calcd. for  $\text{C}_{19}\text{H}_{22}\text{NO}$ :  $[\text{M}+\text{H}]^+$ , 332.1645. Found:  $m/z$  332.1638.

### (*R*)-5-benzoyl-1-(1-phenylethyl)pyridin-2(1H)-one (**3ab**):

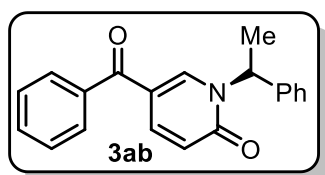

Flash chromatography: PE/EA (5:1)

This compound was prepared by the general procedure described above, affording the

desired product **3w** as a yellow solid (15.2 mg, 25%). mp: 104.8-105.2 °C.

**<sup>1</sup>H NMR (400 MHz, CDCl<sub>3</sub>)** δ 7.86 (dd, *J* = 9.5, 2.5 Hz, 1H), 7.78 (d, *J* = 2.4 Hz, 1H), 7.52 (t, *J* = 7.4 Hz, 1H), 7.44 (d, *J* = 7.1 Hz, 2H), 7.35 (ddd, *J* = 18.0, 9.0, 6.8 Hz, 7H), 6.64 (d, *J* = 9.5 Hz, 1H), 6.42 (q, *J* = 7.0 Hz, 1H), 1.71 (d, *J* = 7.1 Hz, 3H).

**<sup>13</sup>C NMR (101 MHz, CDCl<sub>3</sub>)** δ 191.7, 162.3, 142.2, 139.5, 138.6, 137.2, 132.5, 129.4, 129.3, 128.7, 128.7, 127.8, 120.1, 117.6, 53.9, 19.2.

**HRMS (ESI, m/z):** Calcd. for C<sub>20</sub>H<sub>18</sub>NO<sub>2</sub>: [M+H]<sup>+</sup>, 304.1338. Found: *m/z* 304.1335.

**Specific rotation:** [α] = +30.300

### 5-benzoyl-1,6-dimethylpyridin-2(1H)-one (**3ac**):

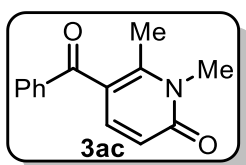

Flash chromatography: PE/EA (5:1)

This compound was prepared by the general procedure described above, affording the desired product **3x** as a yellow solid (23.6 mg, 52%). mp: 133.2-134.5 °C.

**<sup>1</sup>H NMR (400 MHz, CDCl<sub>3</sub>)** δ 7.73 (d, *J* = 7.4 Hz, 2H), 7.58 (t, *J* = 7.3 Hz, 1H), 7.46 (t, *J* = 7.6 Hz, 2H), 7.35 (d, *J* = 9.5 Hz, 1H), 6.44 (d, *J* = 9.4 Hz, 1H), 3.62 (s, 3H), 2.51 (s, 3H).

**<sup>13</sup>C NMR (101 MHz, CDCl<sub>3</sub>)** δ 195.3, 163.1, 151.4, 139.9, 138.2, 133.3, 130.0, 128.8, 117.9, 115.7, 31.7, 18.8.

**HRMS (ESI, m/z):** Calcd. for C<sub>15</sub>H<sub>21</sub>O<sub>4</sub>: [M+H]<sup>+</sup>, 228.1025. Found: *m/z* 228.1022.

### 8'-acetyl-3'H-spiro[cyclohexane-1,2'-indolizin]-5'(1'H)-one (**3ad**):

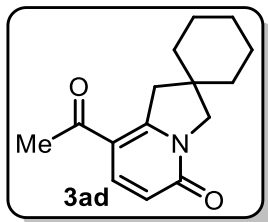

Flash chromatography: PE/EA (5:1)

This compound was prepared by the general procedure described above, affording the desired product **3y** as a yellow solid (25.0 mg, 51%). mp: 105.6-107.1 °C.

**<sup>1</sup>H NMR (400 MHz, CDCl<sub>3</sub>)** δ 7.78 (d, *J* = 9.5 Hz, 1H), 6.40 (d, *J* = 9.5 Hz, 1H), 3.92 (s, 2H), 3.34 (s, 2H), 2.44 (s, 3H), 1.60 – 1.43 (m, 10H).

**<sup>13</sup>C NMR (101 MHz, CDCl<sub>3</sub>)** δ 195.2, 162.1, 157.4, 140.3, 116.5, 114.2, 58.9, 47.0, 39.6, 36.5, 28.2, 25.6, 23.2.

**HRMS (ESI, *m/z*):** Calcd. for C<sub>15</sub>H<sub>20</sub>NO<sub>2</sub>: [M+H]<sup>+</sup>, 246.1494. Found: *m/z* 246.1496.

#### 1-acetyl-6,7,8,9-tetrahydro-4H-quinolizin-4-one (**3ae**):

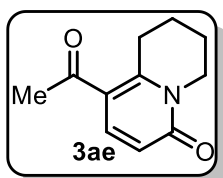

Flash chromatography: PE/EA (5:1)

This compound was prepared by the general procedure described above, affording the desired product **3z** as a yellow solid (16.8 mg, 44%). mp: 98.4-100.1 °C.

**<sup>1</sup>H NMR (400 MHz, CDCl<sub>3</sub>)** δ 7.75 (d, *J* = 9.6 Hz, 1H), 6.44 (d, *J* = 9.6 Hz, 1H), 4.13 – 3.93 (m, 2H), 3.31 (t, *J* = 6.7 Hz, 2H), 2.46 (s, 3H), 1.97 – 1.88 (m, 2H), 1.81 – 1.75 (m, 2H).

**<sup>13</sup>C NMR (101 MHz, CDCl<sub>3</sub>)** δ 196.8, 162.8, 155.8, 139.7, 115.8, 115.2, 43.0, 29.7, 27.6, 21.5, 18.4.

**HRMS (ESI, *m/z*):** Calcd. for C<sub>11</sub>H<sub>14</sub>NO<sub>2</sub>: [M+H]<sup>+</sup>, 192.1025. Found: *m/z* 192.1023.

## 1-acetyl-7,8,9,10-tetrahydropyrido[1,2-a]azepin-4(6H)-one (3af):

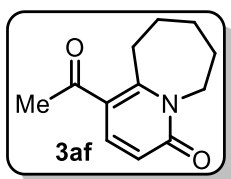

Flash chromatography: PE/EA (5:1)

This compound was prepared by the general procedure described above, affording the desired product **3aa** as a yellow solid (12.3 mg, 30%). mp: 103.7-104.8 °C.

$^1\text{H NMR}$  (400 MHz,  $\text{CDCl}_3$ )  $\delta$  7.62 (d,  $J = 9.6$  Hz, 1H), 6.44 (d,  $J = 9.6$  Hz, 1H), 4.52 – 4.38 (m, 2H), 3.29 (s, 2H), 2.47 (s, 3H), 1.76 (dd,  $J = 10.1, 5.8$  Hz, 6H).

$^{13}\text{C NMR}$  (101 MHz,  $\text{CDCl}_3$ )  $\delta$  198.1, 162.5, 158.3, 139.1, 117.4, 116.5, 43.6, 29.9, 29.5, 29.2, 27.3, 25.7.

HRMS (ESI,  $m/z$ ): Calcd. for  $\text{C}_{12}\text{H}_{16}\text{NO}_2$ :  $[\text{M}+\text{H}]^+$ , 206.1181. Found:  $m/z$  206.1180.

## 5. Practical utilities of [3+3] annulation into 2-pyridones

### Low catalytic loading (0.2 mol%) on 2.0 mmol scale

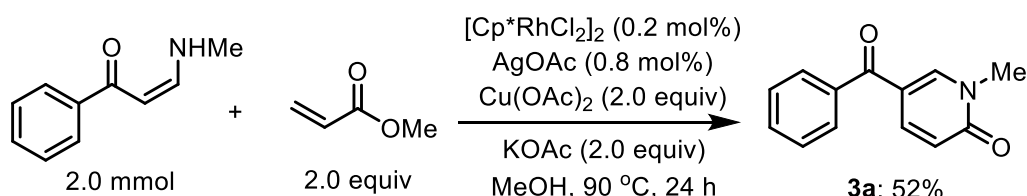

Typical procedure for [3+3] annulation into 2-pyridones: To a 25 mL Schlenk flask equipped with magnetic stirring bar was added (Z)-3-(methylamino)-1-phenylprop-2-en-1-one **1a** (2.0 mmol, 1.0 equiv),  $[\text{Cp}^*\text{RhCl}_2]_2$  (2.5 mg, 0.004 mmol), AgOAc (2.7 mg, 0.016 mmol, 0.08

equiv), Cu(OAc)<sub>2</sub> (726 mg, 4.0 mmol, 2.0 equiv), KOAc (393 mg, 4.0 mmol, 2.0 equiv). Then the mixture was evacuated and backfilled with N<sub>2</sub> three times. After that methyl acrylate (**2**, 344 mg, 0.30 mmol, 2.0 equiv) in MeOH (10 mL) was injected into the test tube *via* syringe under N<sub>2</sub> atmosphere. The reaction mixture was allowed to stir at 90 °C for 12 h, during which time a constant checking by TLC was performed. Once the reaction proceeded to a desired degree, the resulting reaction mixture was mixed with a small amount of silica gel and concentrated. The crude product was purified by flash column chromatography on silica gel with PE/EtOAc as the eluent to afford the yellow solid **3a** (222mg, 52%).

## 6. Mechanistic study

### 6.1 Experiments for enamines with the reactive sites

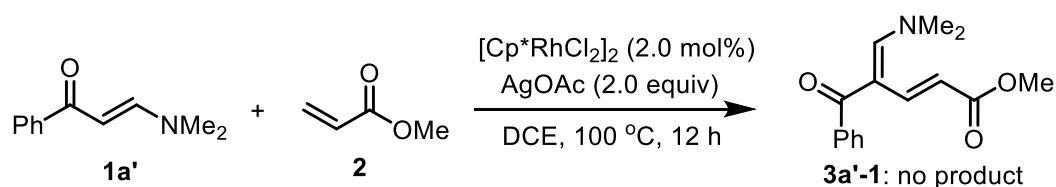

To a 10 mL Schlenk flask equipped with magnetic stirring bar was added (*E*)-3-(dimethylamino)-1-phenylprop-2-en-1-one (**1a'**, 0.2 mmol, 1.0 equiv), [Cp<sup>\*</sup>RhCl<sub>2</sub>]<sub>2</sub> (2.5 mg, 0.004 mmol), AgOAc (66.8 mg, 0.4 mmol, 2.0 equiv). Then the mixture was evacuated and backfilled with N<sub>2</sub> three times. After that methyl acrylate (**2**, 25.8 mg, 0.30 mmol, 1.5 equiv) in DCE (1.0 mL) was injected into the test tube *via* syringe under N<sub>2</sub> atmosphere. The reaction mixture was allowed to stir at 100 °C for 12 h, during which time a constant checking by TLC was performed.

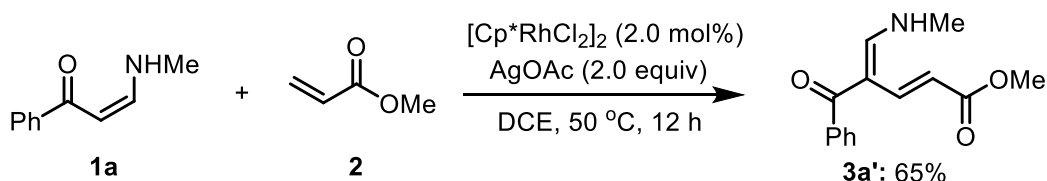

To a 10 mL Schlenk flask equipped with magnetic stirring bar was added (Z)-3-(methylamino)-1-phenylprop-2-en-1-one (**1a**, 0.2 mmol, 1.0 equiv), [Cp\*RhCl<sub>2</sub>]<sub>2</sub> (2.5 mg, 0.004 mmol), AgOAc (66.8 mg, 0.4 mmol, 2.0 equiv). Then the mixture was evacuated and backfilled with N<sub>2</sub> three times. After that methyl acrylate (**2**, 25.8 mg, 0.30 mmol, 1.5 equiv) in DCE (1.0 mL) was injected into the test tube via syringe under N<sub>2</sub> atmosphere. The reaction mixture could stir at 50 °C for 12 h, during which time a constant checking by TLC was performed. Once the reaction proceeded to a desired degree, the resulting reaction mixture was mixed with a small amount of silica gel and concentrated. The crude product was purified by flash column chromatography on silica gel with PE/EtOAc as the eluent to afford the yellow solid **3a'** (31.9 mg, 65% ).

#### Methyl (2E,4Z)-4-benzoyl-5-(methylamino)penta-2,4-dienoate (**3a'**):

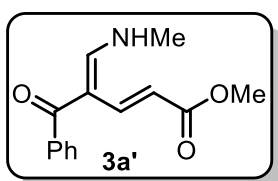

Flash chromatography: PE/EA (3:1)

Afford the desired product **3a'** as a yellow solid (31.9 mg, 65%). mp: 128.7-129.8 °C.

<sup>1</sup>H NMR (400 MHz, CDCl<sub>3</sub>) δ 11.01 (s, 1H), 7.62 – 7.55 (m, 2H), 7.47 – 7.44 (m, 2H), 7.44 – 7.37 (m, 3H), 5.59 (d, *J* = 15.7 Hz, 1H), 3.65 (s, 3H), 3.20 (dd, *J* = 5.1, 0.5 Hz, 3H).

<sup>13</sup>C NMR (101 MHz, CDCl<sub>3</sub>) δ 195.2, 168.5, 157.6, 145.4, 140.4, 130.5, 128.4, 128.1, 105.4,

103.4, 51.4, 36.6.

**HRMS (ESI, m/z):** Calcd. for C<sub>14</sub>H<sub>16</sub>NO<sub>3</sub>: [M+H]<sup>+</sup>, 246.1130. Found: *m/z* 246.1128.

## 6.2 Experiments of intermediate cyclization

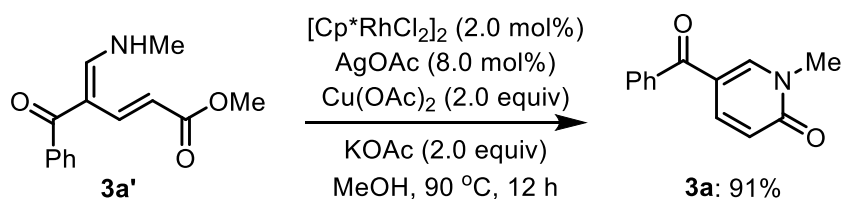

To a 10 mL Schlenk flask equipped with magnetic stirring bar was added methyl (2E,4Z)-4-benzoyl-5-(methylamino)penta-2,4-dienoate (**3a'**, 0.2 mmol, 1.0 equiv), [Cp\*RhCl<sub>2</sub>]<sub>2</sub> (2.5 mg, 0.004 mmol), AgOAc (2.7 mg, 0.016 mmol, 0.08 equiv), Cu(OAc)<sub>2</sub> (72.6 mg, 4.0 mmol, 2.0 equiv), KOAc (39.3 mg, 4.0 mmol, 2.0 equiv). Then the mixture was evacuated and backfilled with N<sub>2</sub> three times. After that MeOH (1.0 mL) was injected into the test tube via syringe under N<sub>2</sub> atmosphere. The reaction mixture was allowed to stir at 90 °C for 12 h, during which time a constant checking by TLC was performed. Once the reaction proceeded to a desired degree, the resulting reaction mixture was mixed with a small amount of silica gel and concentrated. The crude product was purified by flash column chromatography on silica gel with PE/EtOAc as the eluent to afford the yellow solid **3a** (38.8 mg, 91%).

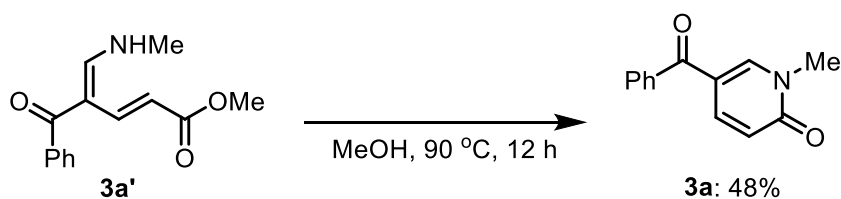



To a 10 mL Schlenk flask equipped with magnetic stirring bar was added methyl (2*E*,4*Z*)-4-benzoyl-5-(methylamino)penta-2,4-dienoate (**3a'**, 0.2 mmol, 1.0 equiv). Then the mixture was evacuated and backfilled with N<sub>2</sub> three times. After that MeOH (1.0 mL) was injected into the test tube via syringe under N<sub>2</sub> atmosphere. The reaction mixture was allowed to stir at 90 °C for 12 h, during which time a constant checking by TLC was performed. Once the reaction proceeded to a desired degree, the resulting reaction mixture was mixed with a small amount of silica gel and concentrated. The crude product was purified by flash column chromatography on silica gel with PE/EtOAc as the eluent to afford the yellow solid **3a** (20.5 mg, 48%).

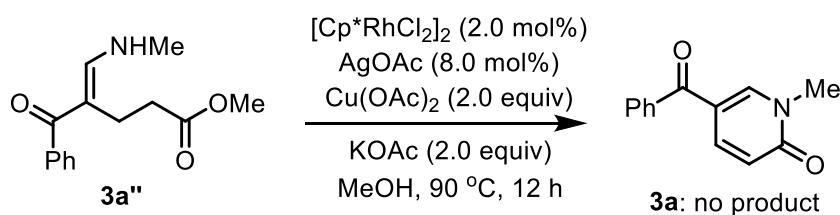

To a 10 mL Schlenk flask equipped with magnetic stir bar was added methyl (2*E*,4*Z*)-4-benzoyl-5-(methylamino)penta-2,4-dienoate (**3a''**, 0.2 mmol, 1.0 equiv),  $[Cp^*RhCl_2]_2$  (2.5 mg, 0.004 mmol), AgOAc (2.7 mg, 0.016 mmol, 0.08 equiv),  $Cu(OAc)_2$  (72.6 mg, 4.0 mmol, 2.0 equiv), KOAc (39.3 mg, 4.0 mmol, 2.0 equiv). Then the mixture was evacuated and backfilled with N<sub>2</sub> three times. After that MeOH (1.0 mL) was injected into the test tube via syringe under N<sub>2</sub> atmosphere. The reaction mixture was allowed to stir at 90 °C for 12 h, during which time a constant checking by TLC was performed.

**Methyl (Z)-4-benzoyl-5-(methylamino)pent-4-enoate (3a'')**:

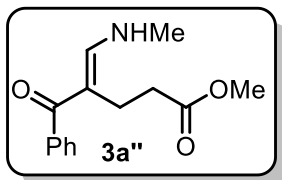

Flash chromatography: PE/EA (5:1)

Afford the desired product **3a''** as a yellow liquid (44.5 mg, 90%).

$^1\text{H NMR}$  (400 MHz,  $\text{CDCl}_3$ )  $\delta$  7.90 – 7.84 (m, 2H), 7.77 (s, 1H), 7.47 – 7.35 (m, 3H), 5.73 (d,  $J = 12.5$  Hz, 1H), 3.69 (s, 3H), 3.60 (s, 2H), 3.01 (d,  $J = 74.3$  Hz, 3H), 2.62 (t,  $J = 6.7$  Hz, 2H).

$^{13}\text{C NMR}$  (101 MHz,  $\text{CDCl}_3$ )  $\delta$  189.0, 171.4, 153.6, 140.4, 131.2, 128.3, 127.6, 93.2, 53.6, 52.2, 35.8, 33.9.

### 6.3 Deuterated experiments

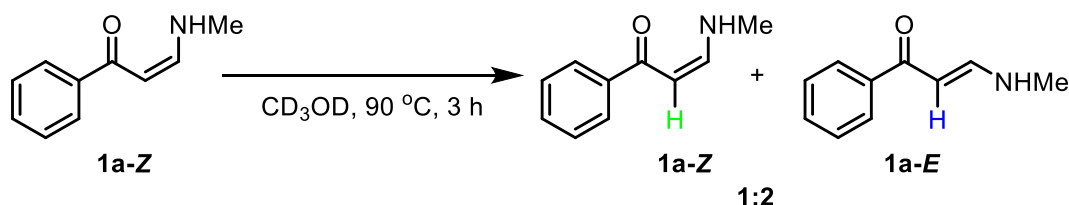

To a 10 mL Schlenk flask equipped with magnetic stirring bar was added (Z)-3-(methylamino)-1-phenylprop-2-en-1-one (**1a**, 0.1 mmol, 1.0 equiv). Then the mixture was evacuated and backfilled with  $\text{N}_2$  three times. After that  $\text{CD}_3\text{OD}$  (0.5 mL) was injected into the test tube *via* syringe under  $\text{N}_2$  atmosphere. The reaction mixture was allowed to stir at 90 °C for 3 h, the resulting reaction mixture was directly detected by NMR.

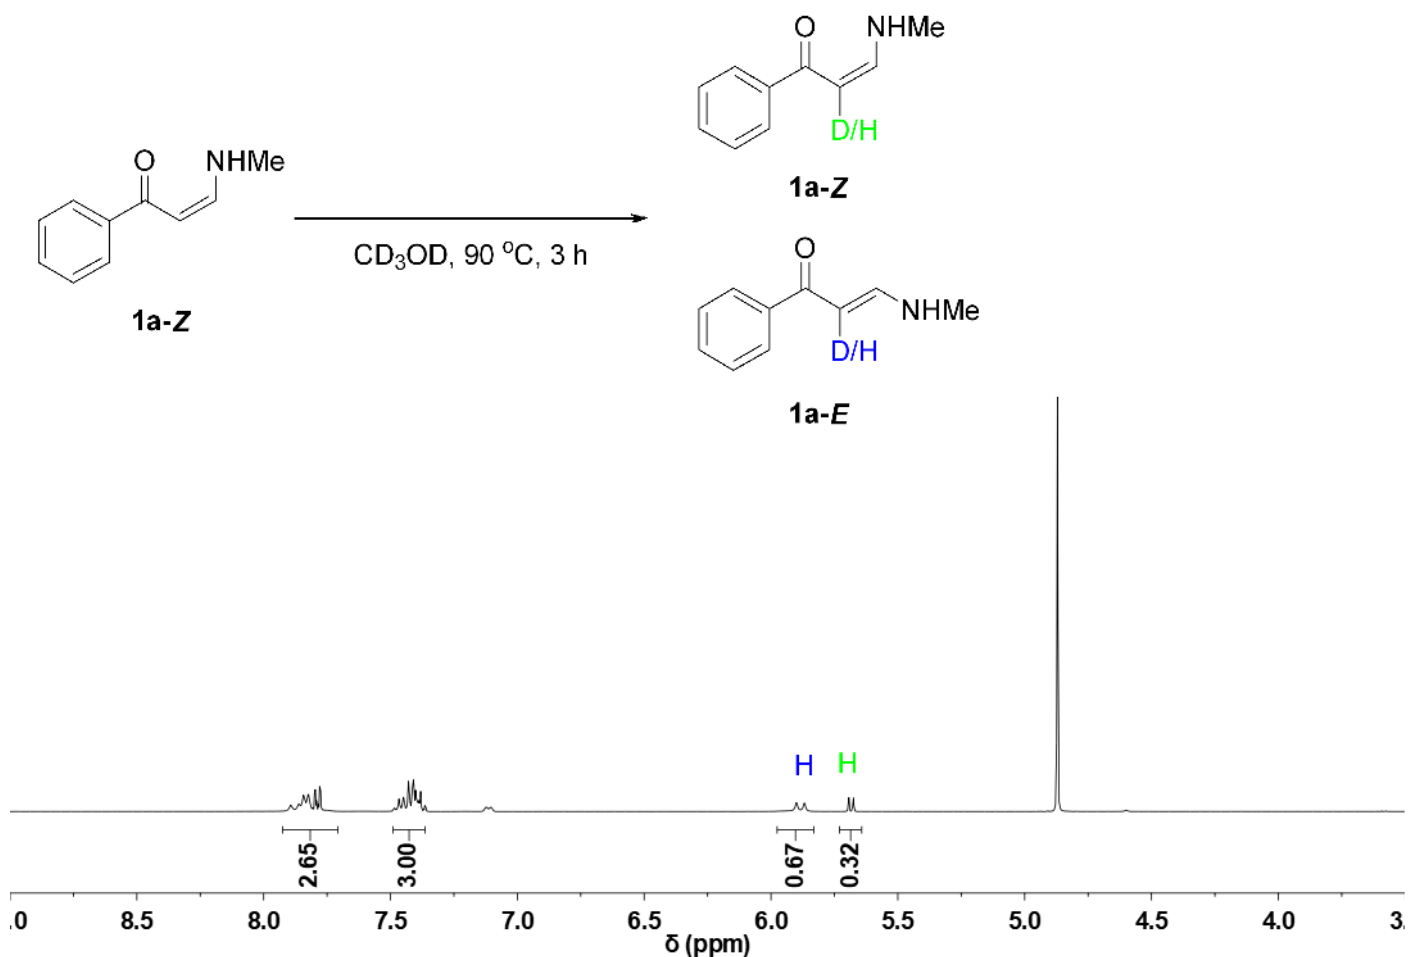

Fig. S1  $^1\text{H-NMR}$  of **1a** in  $\text{CD}_3\text{OD}$

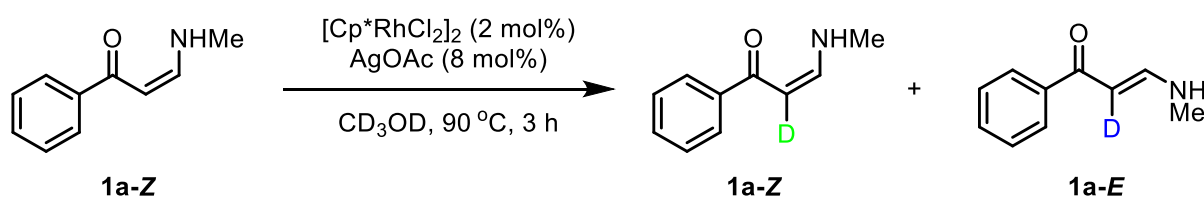

To a 10 mL Schlenk flask equipped with magnetic stirring bar was added (Z)-3-(methylamino)-1-phenylprop-2-en-1-one (**1a**, 0.1 mmol, 1.0 equiv),  $[\text{Cp}^*\text{RhCl}_2]_2$  (1.2 mg, 0.002 mmol),  $\text{AgOAc}$  (1.3 mg, 0.008 mmol). Then the mixture was evacuated and backfilled with  $\text{N}_2$  three times. After that  $\text{CD}_3\text{OD}$  (0.5 mL) was injected into the test tube via syringe under  $\text{N}_2$  atmosphere. The reaction mixture was allowed to stir at  $90\text{ }^\circ\text{C}$  for 3 h, the

resulting reaction mixture was directly detected by NMR.

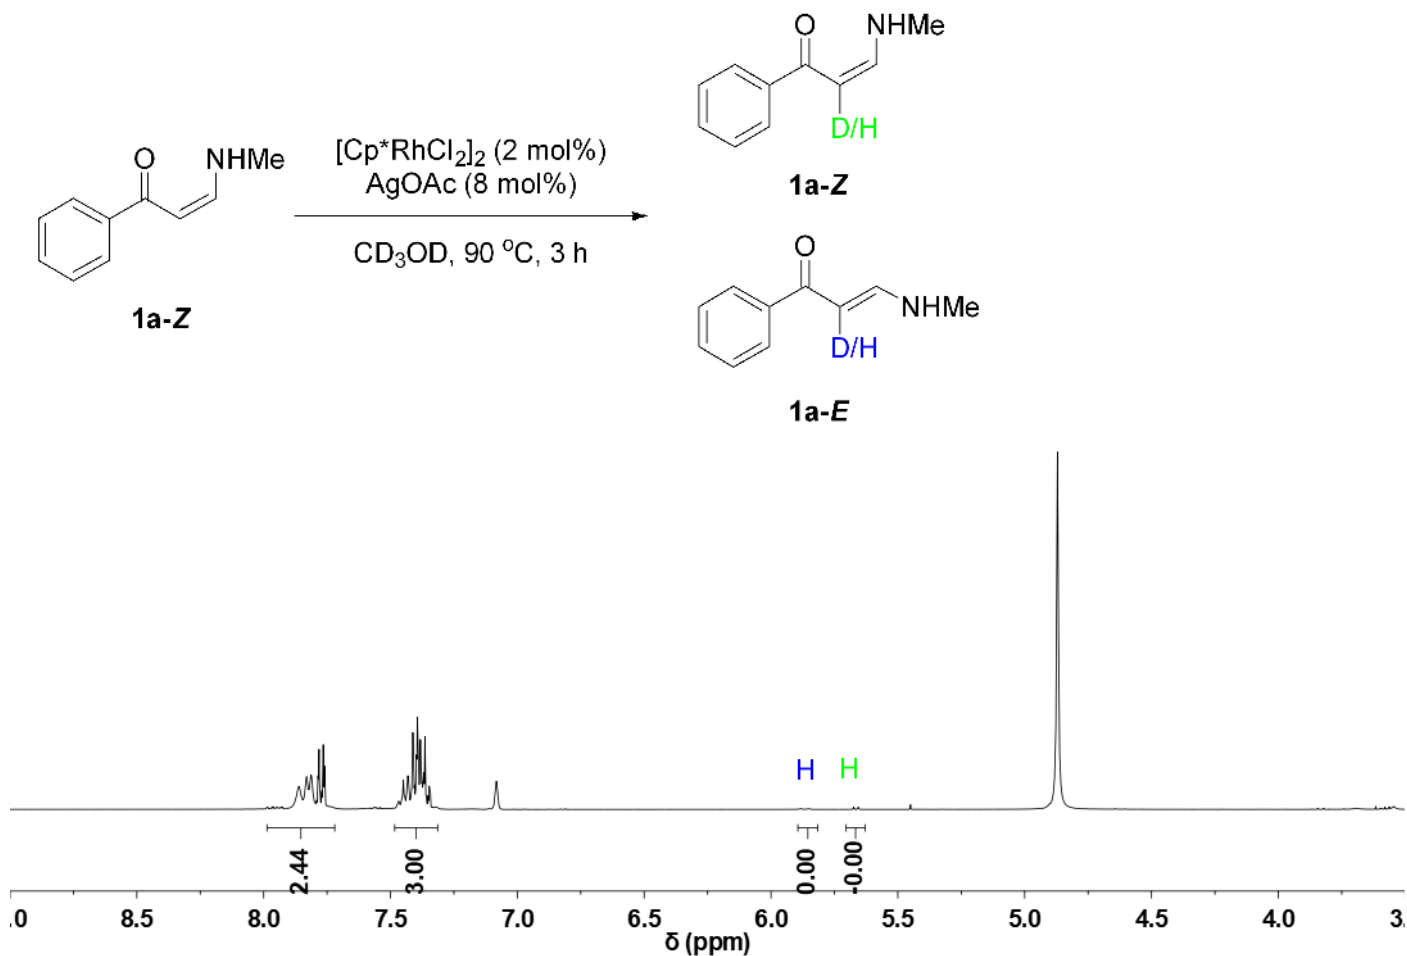

**Fig. S2** Deuteriation experiments of **1a**

Deuteriation experiments were detected by  $^1\text{H}$  NMR in  $\text{CD}_3\text{OD}$  as shown in **Fig. S1**. Enaminone **1a** with Z configuration can be converted to one with E configuration in  $\text{CD}_3\text{OD}$  at 90 °C for 3h. **Fig. S2** under  $[\text{Cp}^*\text{RhCl}_2]_2$  and AgOAc catalytic system, hydrogen of enaminone **1a** at  $\alpha$ -position can be almost completely deuterated.

## **7. References**

1. S. Zhou, J. Wang, L. Wang, C. Song, K. Chen and J. Zhu, *Angew. Chem. Int. Ed.*, 2016, **55**, 9384-9388.
2. A. S. Devi, M. C. Dutta, R. Nongkhlaw and J. N. Vishwakarma, *J. Indian. Chem. Soc.*, 2010, **87**, 739-742.
3. A. D. N. Brenno, A. M. L. Alexandre, B. B. Alinne and R. Dennis, *Tetrahedron.*, 2009, **65**, 2484-2496.
4. E. Philipped, B. Aniel, P. C. Jean, L. Gérard, *Can. J. Chem.*, 1991, **69**, 1201-1206.
5. P. Šimůnek, M. Svobodová, V. Bertolasi, V. Macháček, *Synthesis*, **2008**, *11*, 1761-1766.
6. B. Pettersson, V. Hasimbegovic, J. Bergman, *J. Org. Chem.* **2011**, *76*, 1554-1561.

## 8. $^1\text{H}$ and $^{13}\text{C}$ NMR spectra

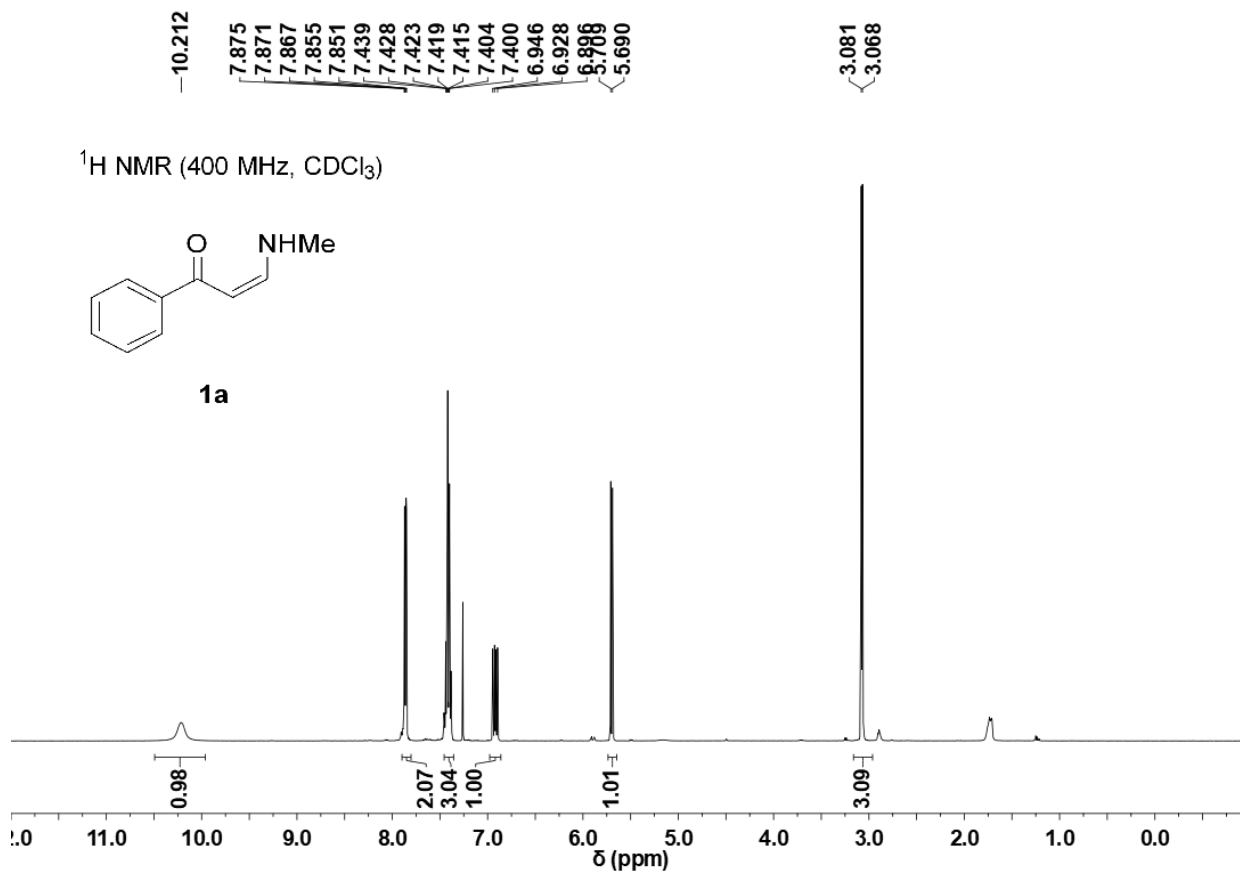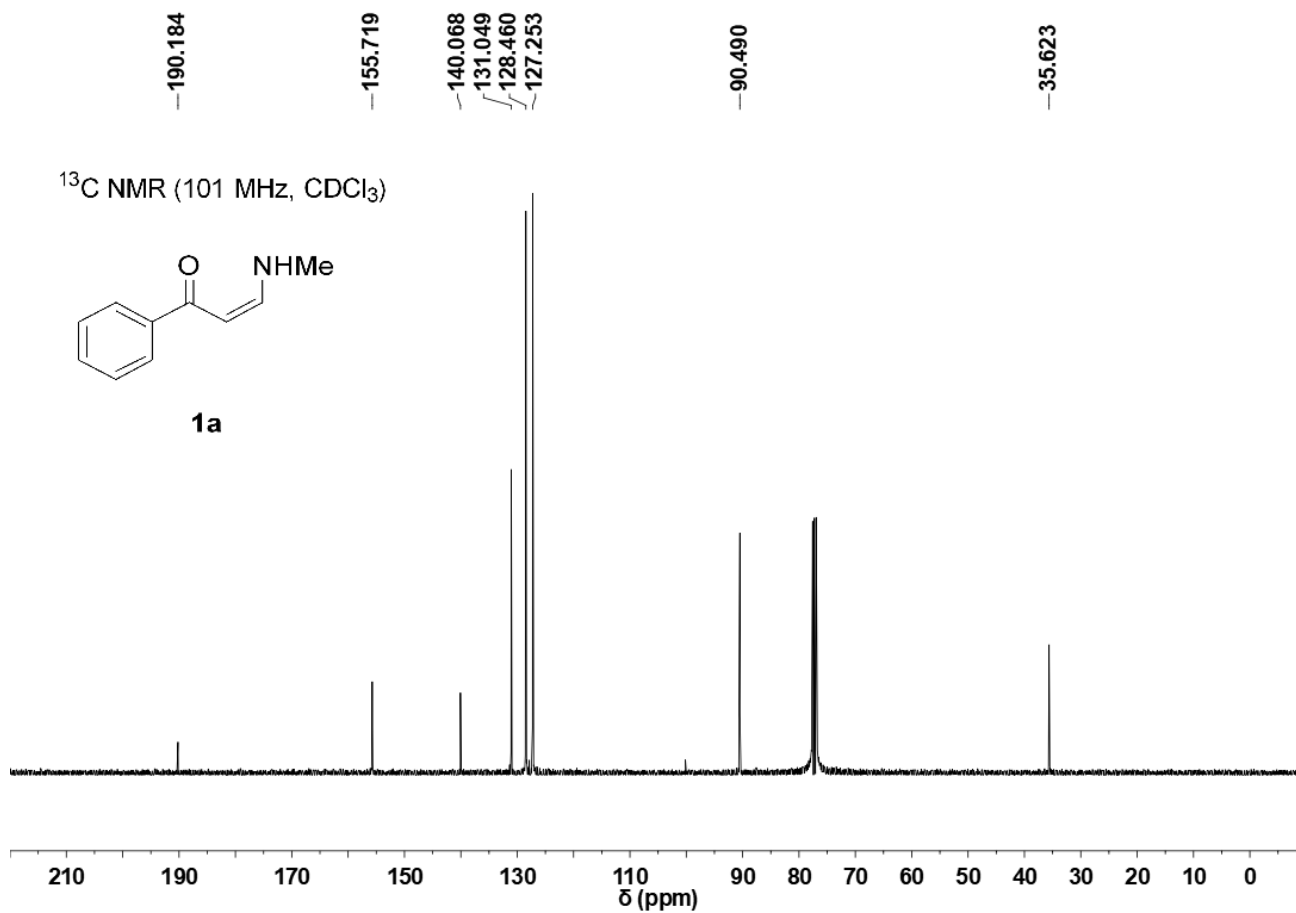

10.239  
 7.792  
 7.787  
 7.779  
 7.379  
 7.366  
 7.354  
 7.274  
 7.201  
 7.182  
 7.172  
 7.164  
 7.086  
 7.063  
 7.058  
 5.728  
 5.678  
 5.671  
 5.662  
 5.654  
 3.087  
 3.074  
 2.825

<sup>1</sup>H NMR (400 MHz, CDCl<sub>3</sub>)

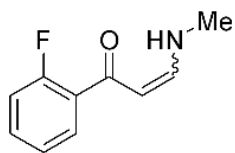

**1b (Z:E=1:0.33)**

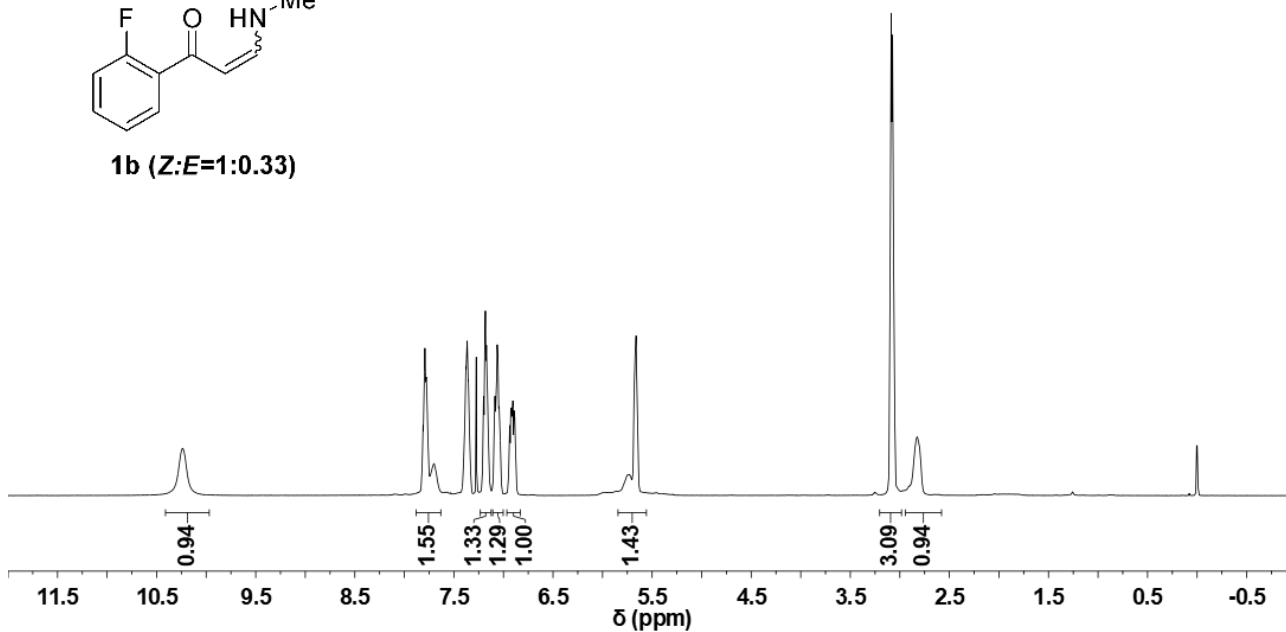

186.607  
 161.852  
 159.357  
 155.900  
 132.106  
 132.019  
 130.433  
 130.400  
 128.494  
 124.289  
 124.253  
 116.459  
 106.667  
 94.854  
 94.840  
 94.759  
 94.746  
 35.650

<sup>13</sup>C NMR (101 MHz, CDCl<sub>3</sub>)

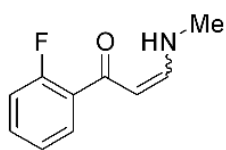

**1b (Z:E=1:0.33)**

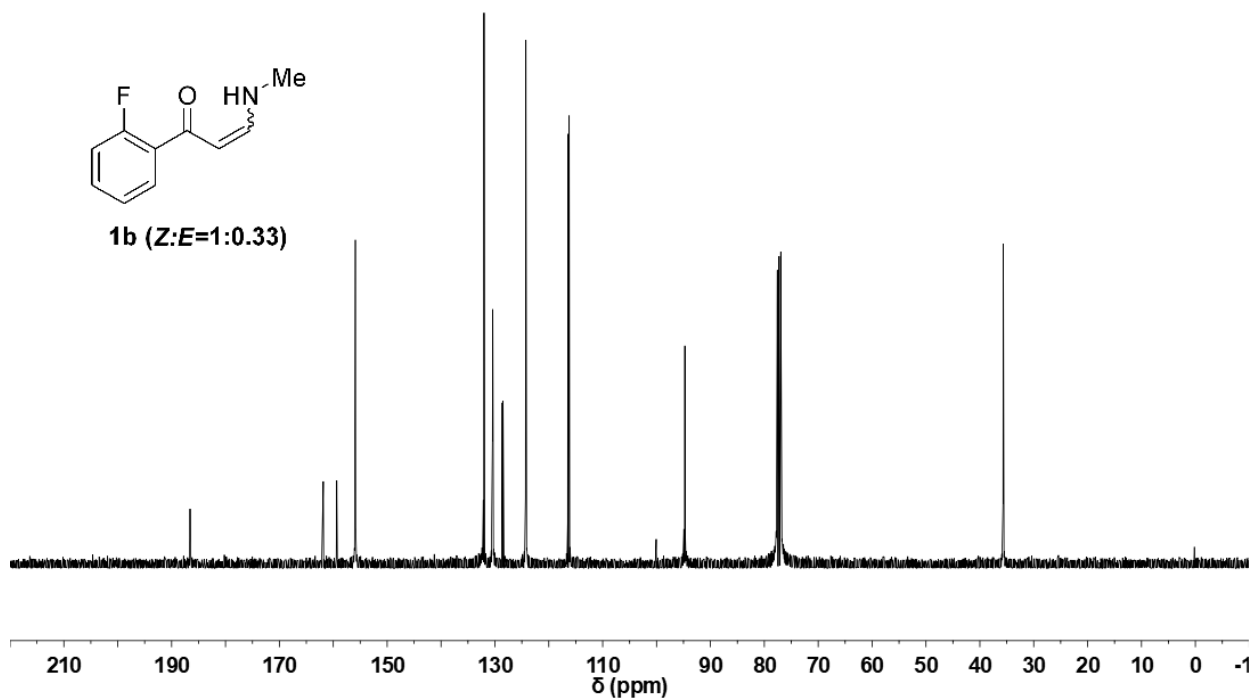

$^{19}\text{F}$  NMR (471 MHz,  $\text{CDCl}_3$ )

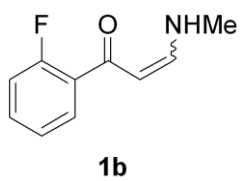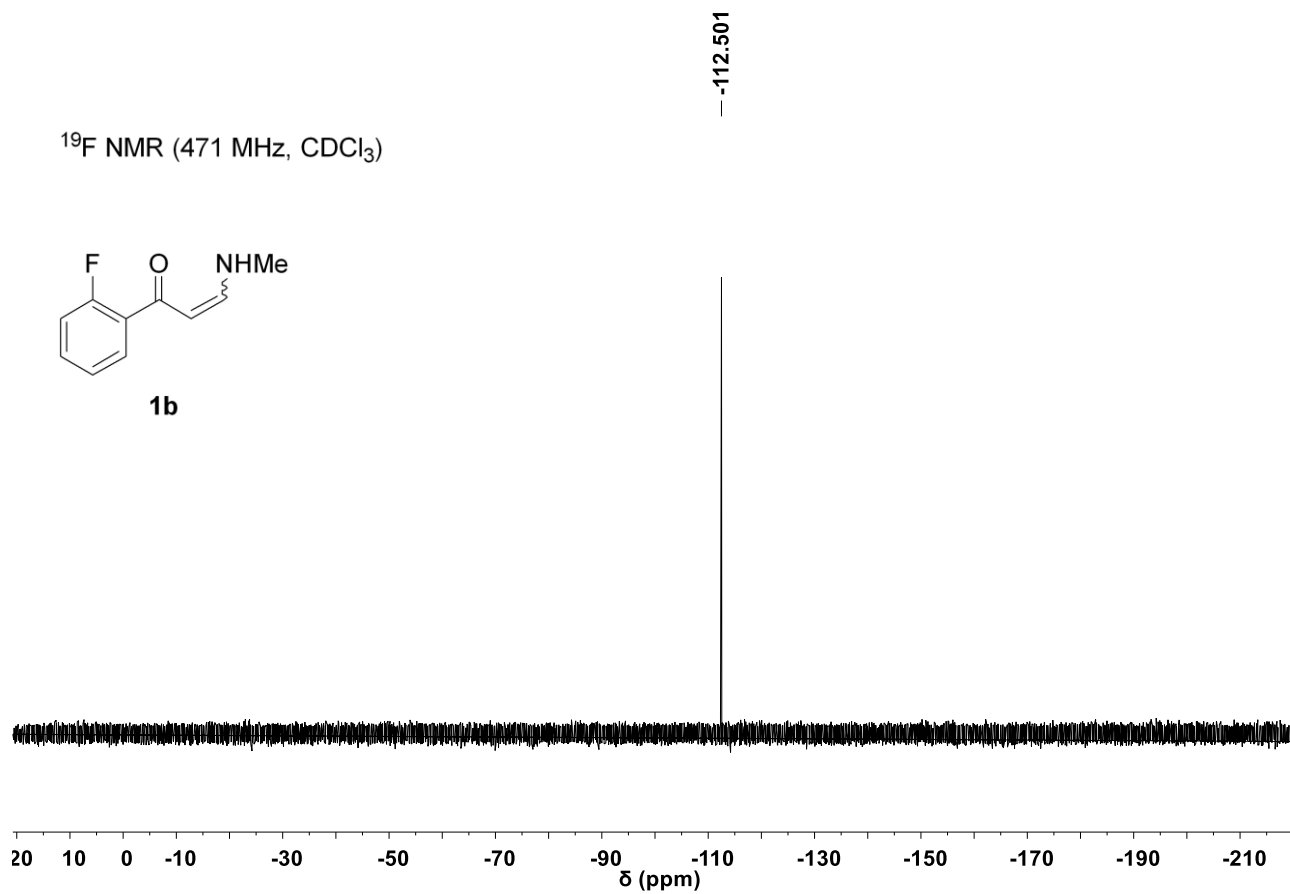



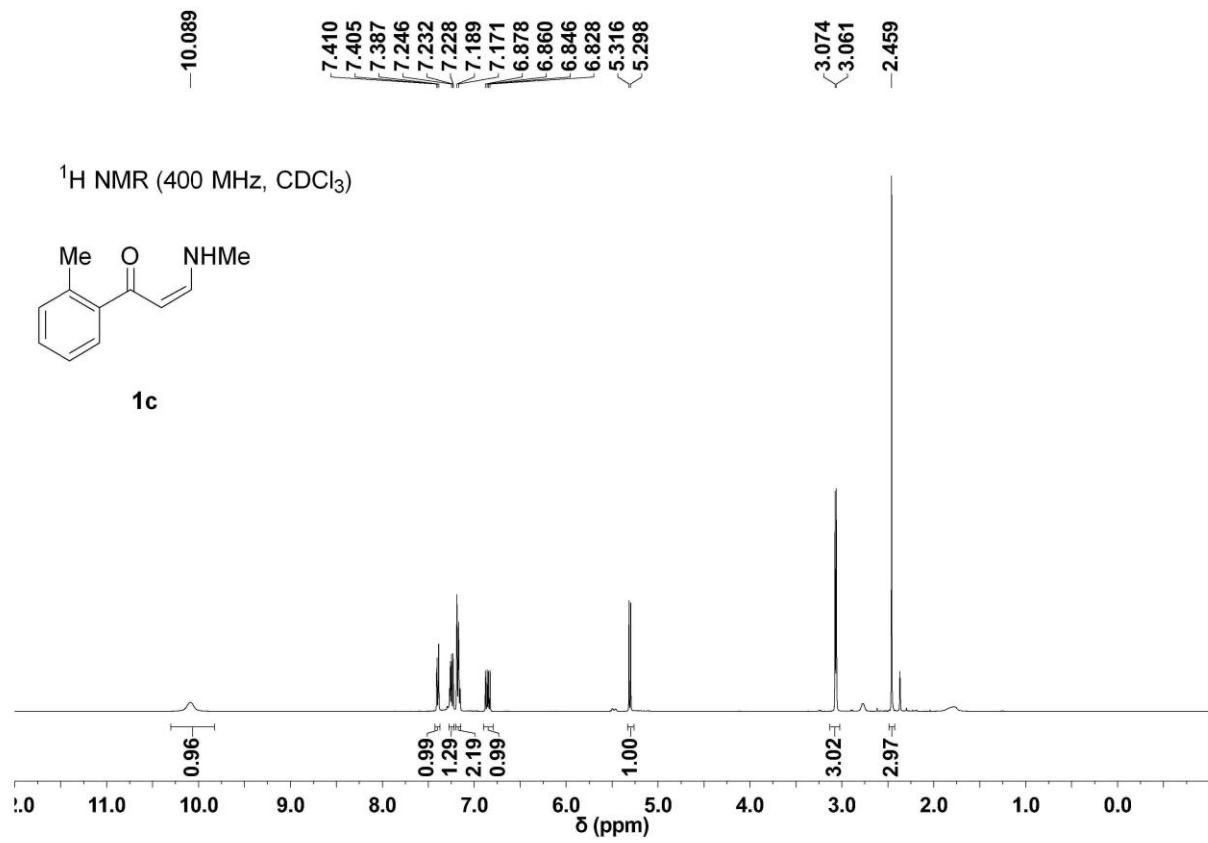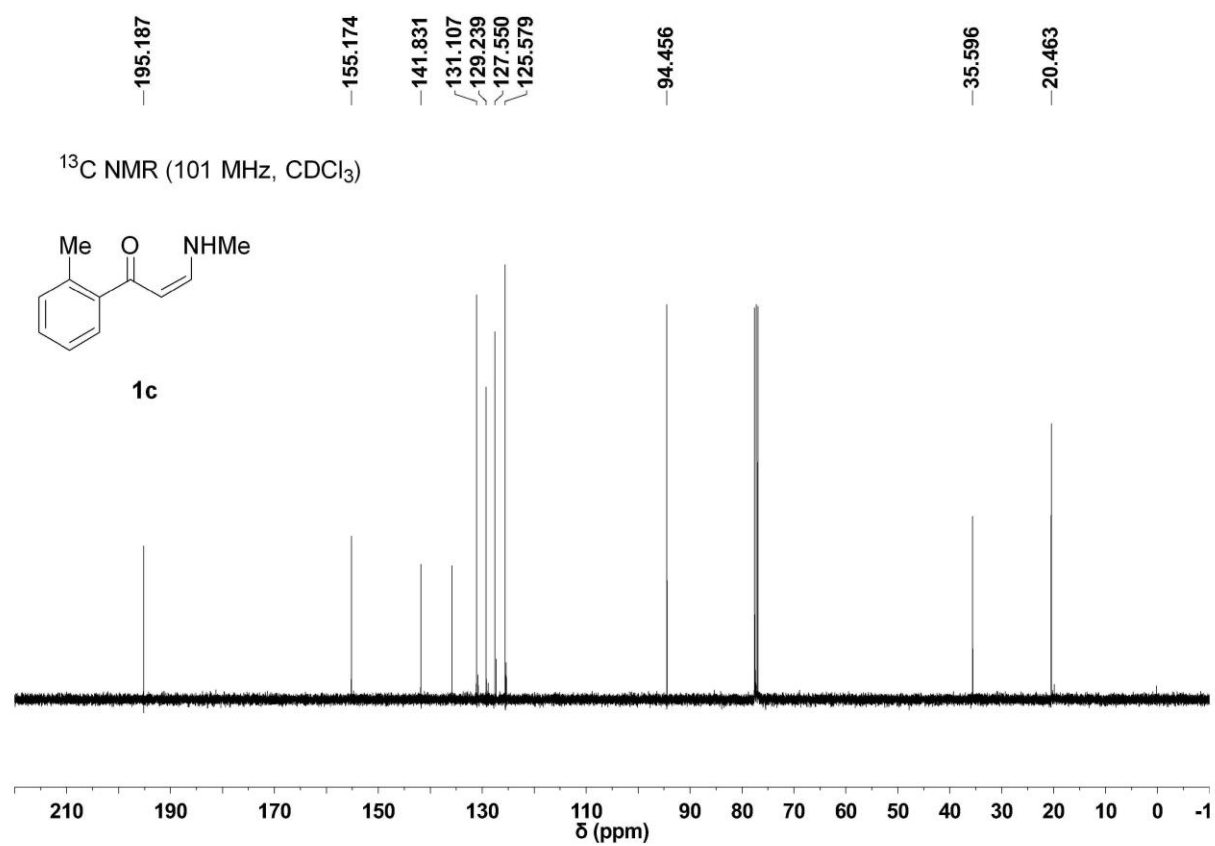

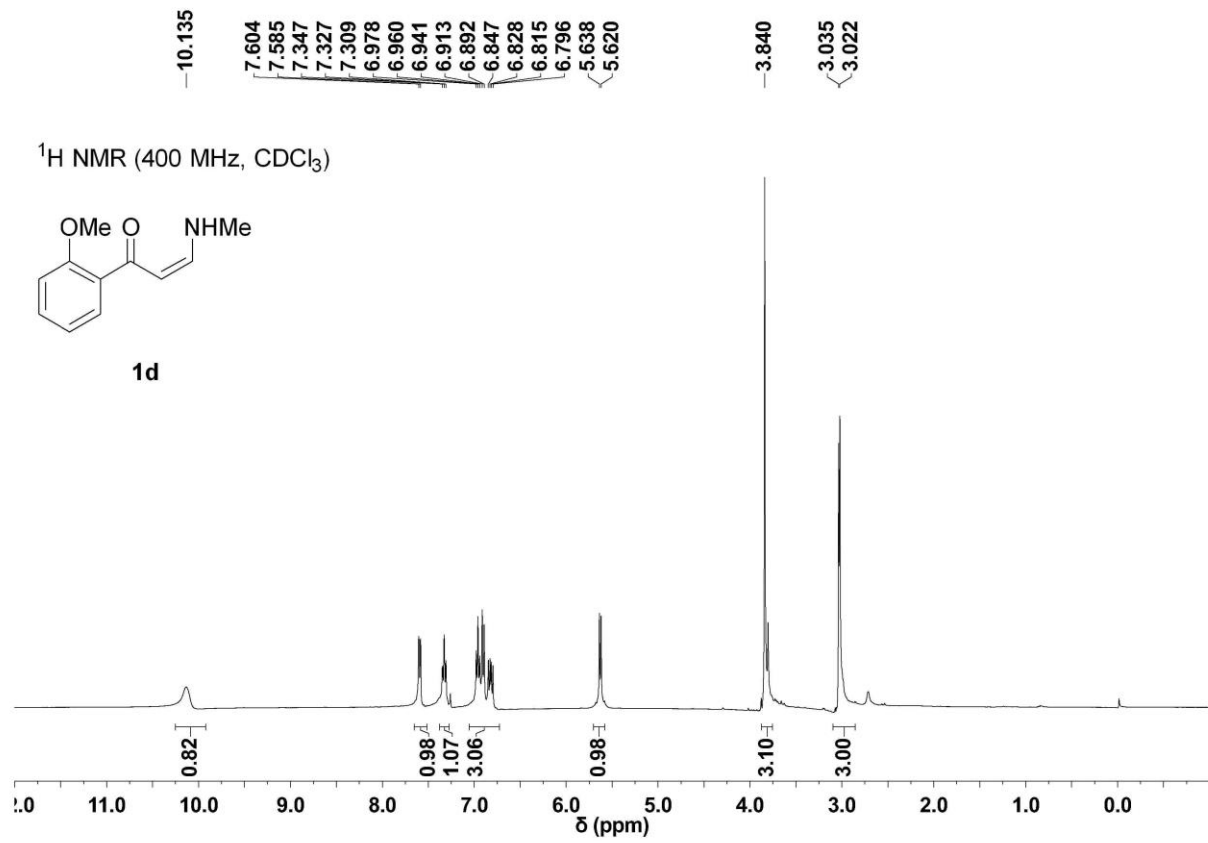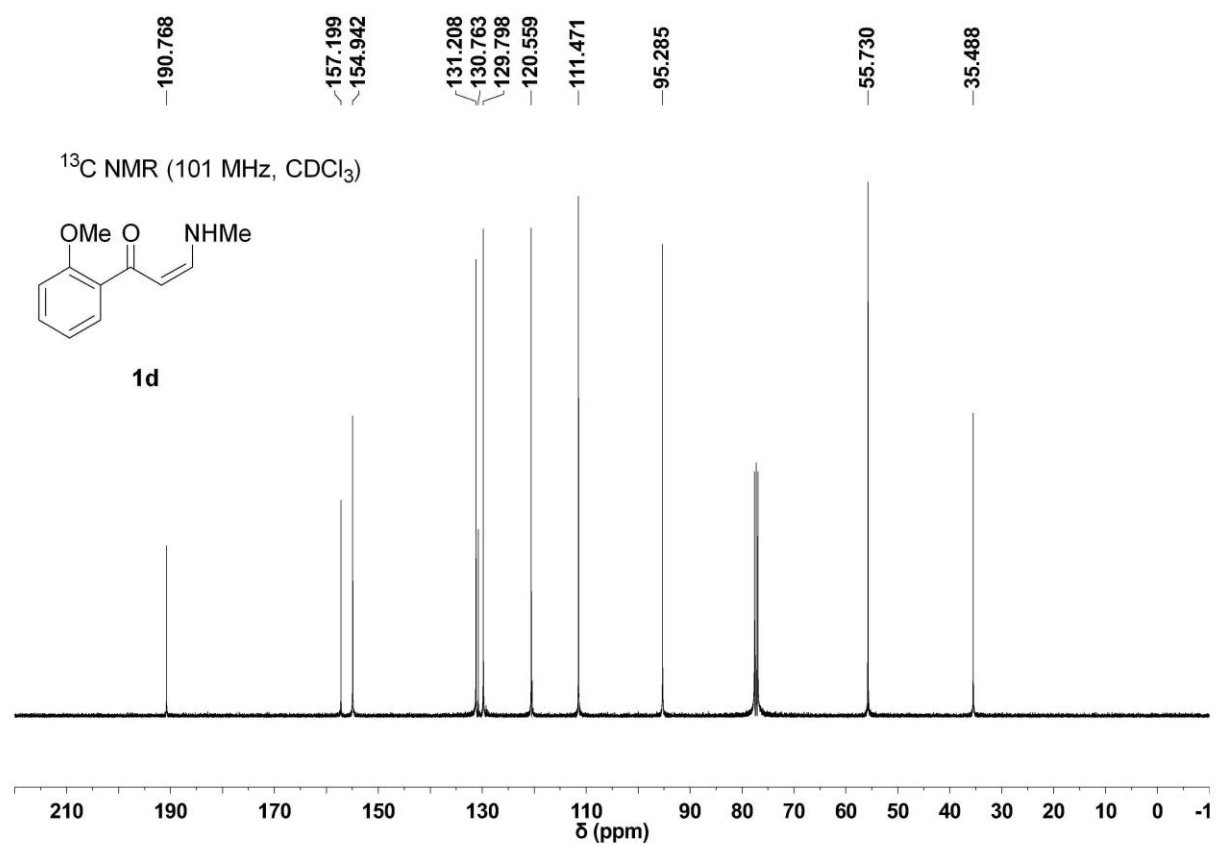

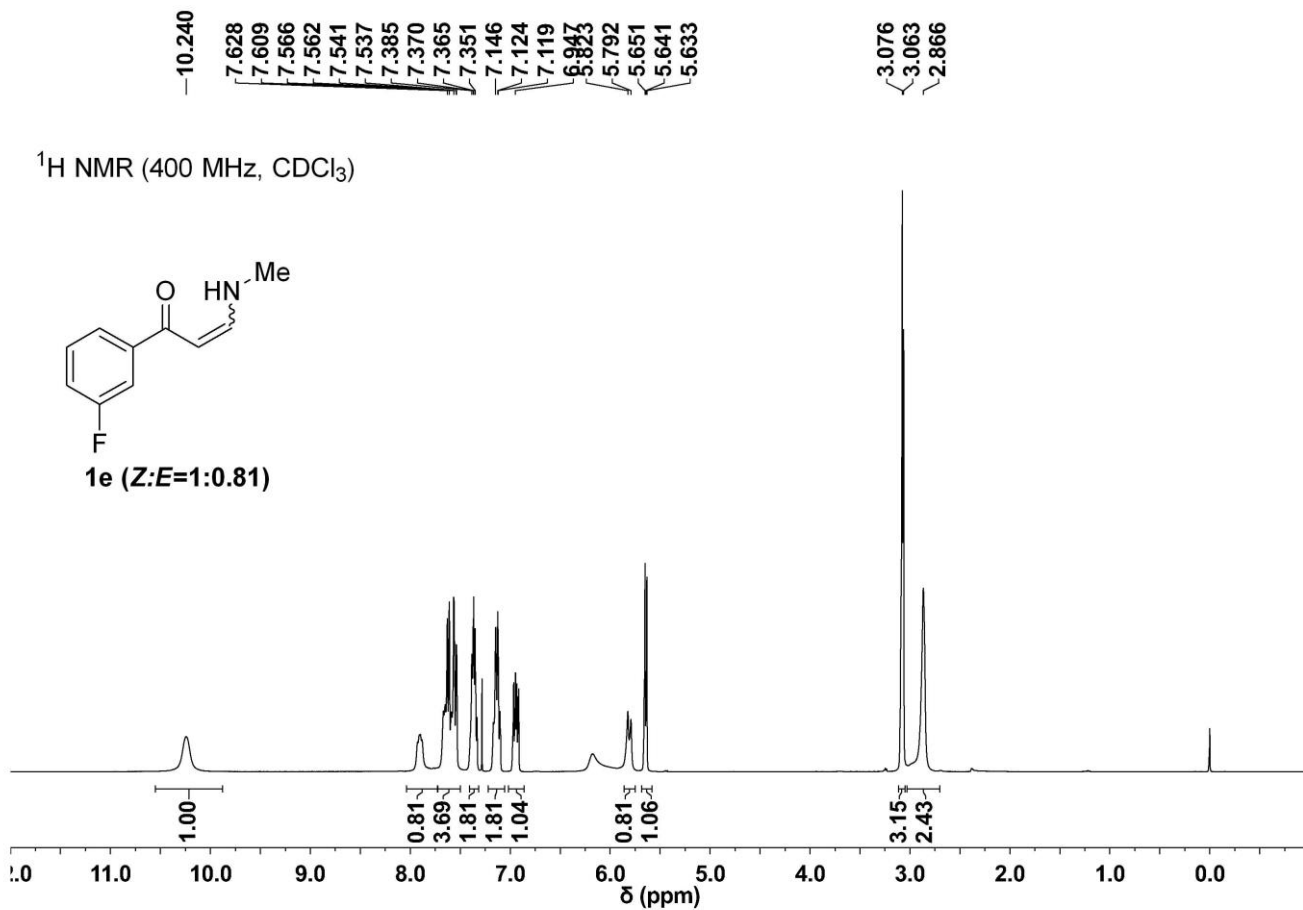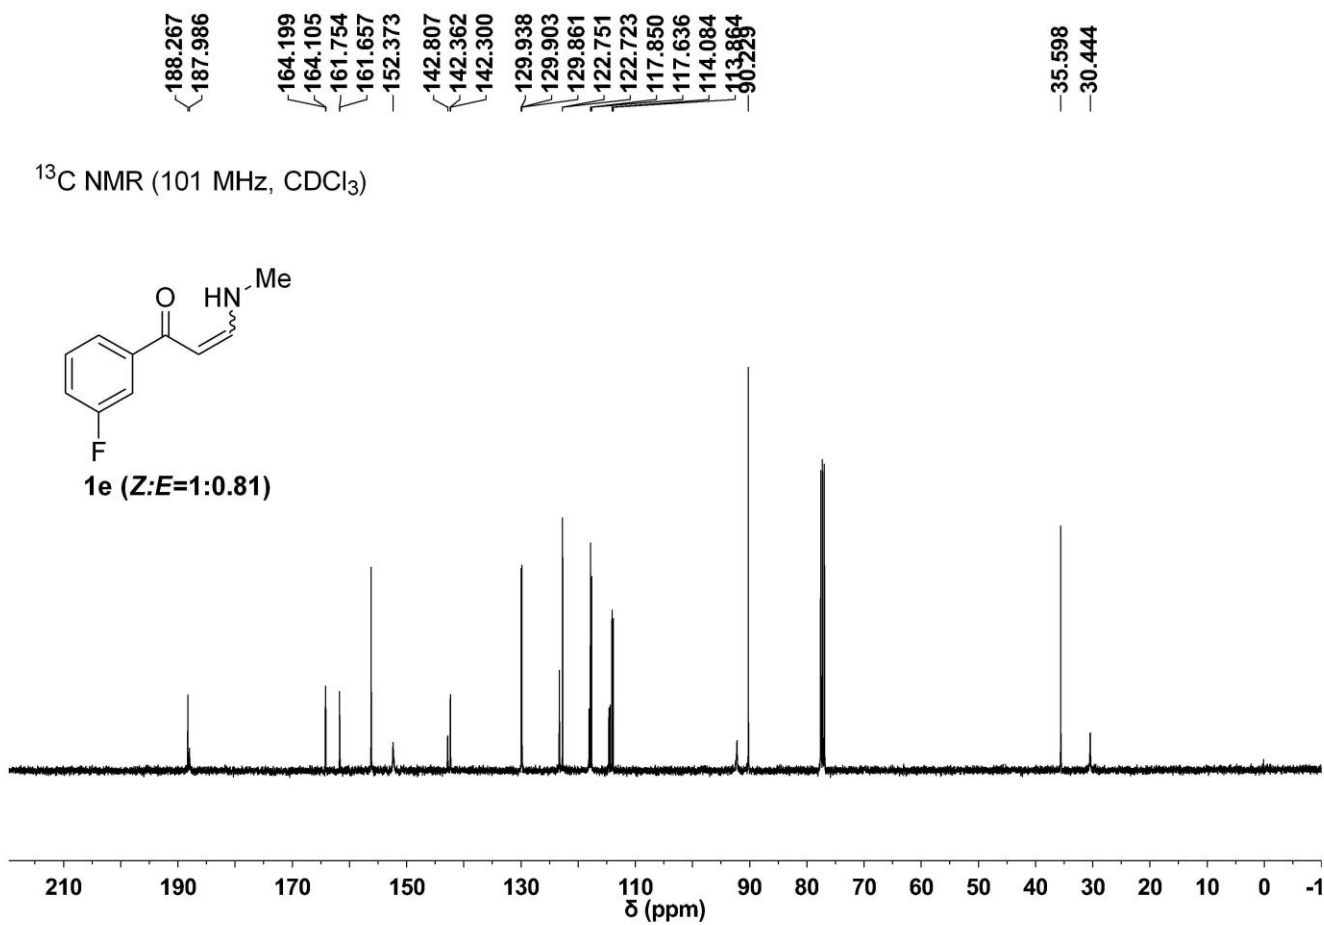

$^{19}\text{F}$  NMR (471 MHz,  $\text{CDCl}_3$ )

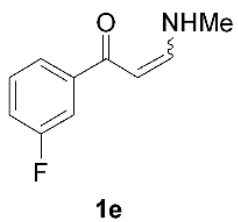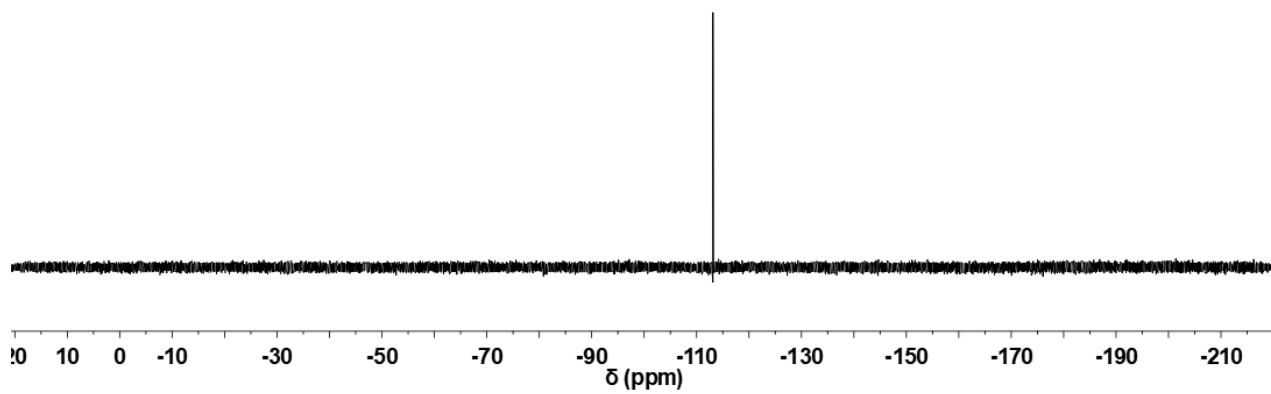

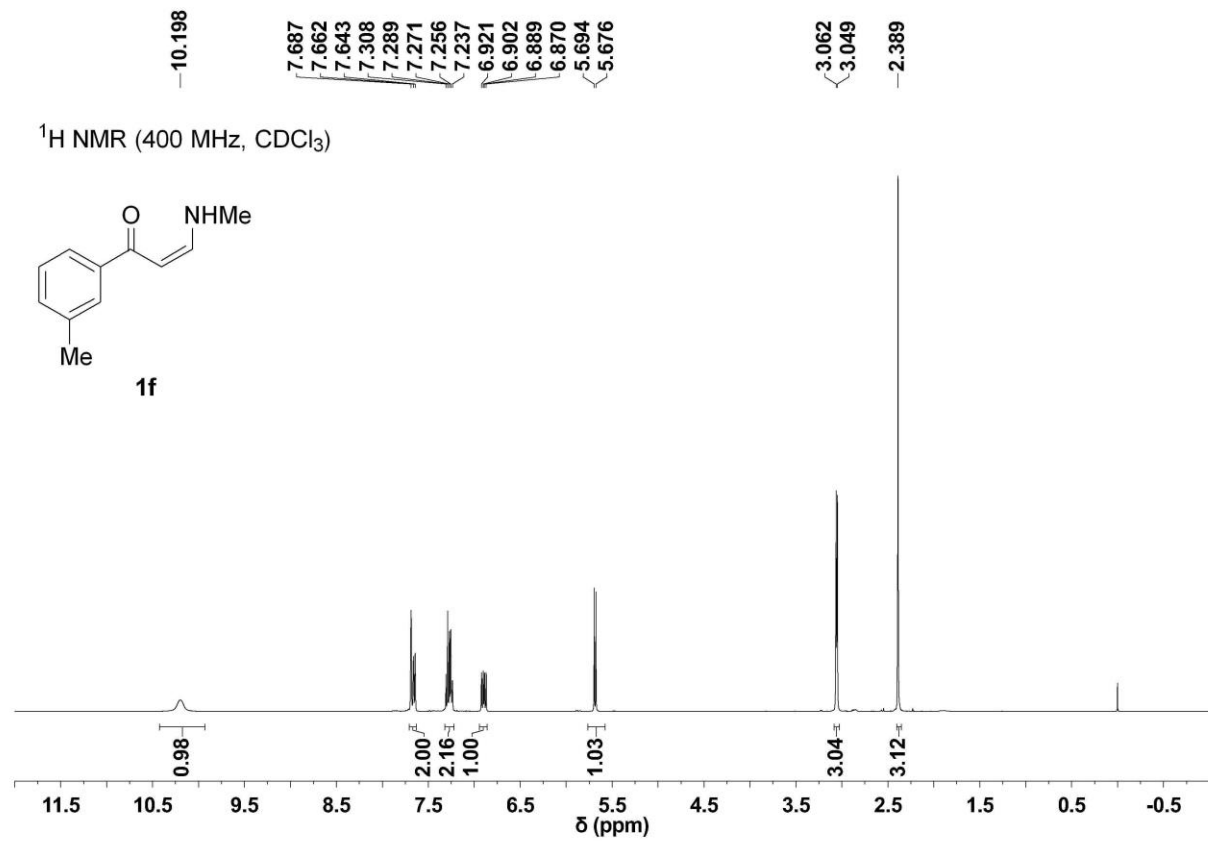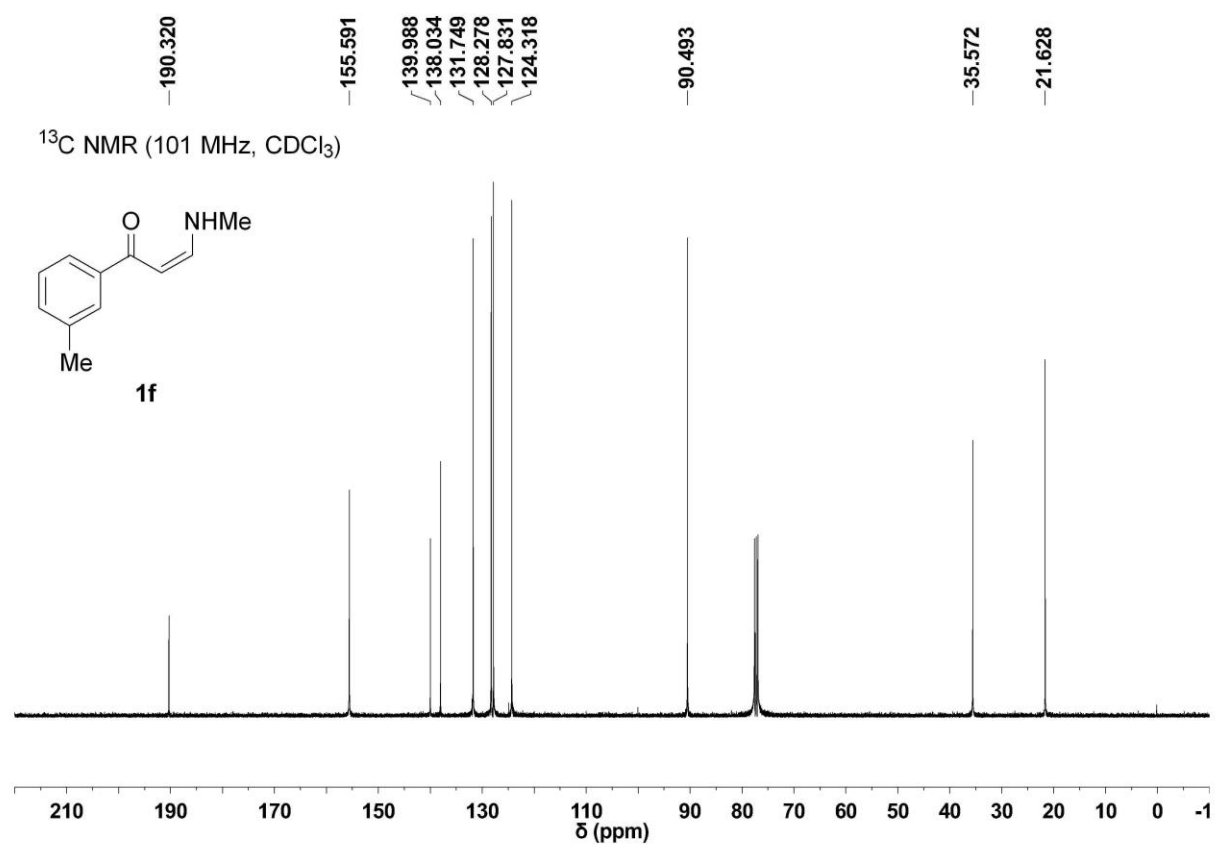

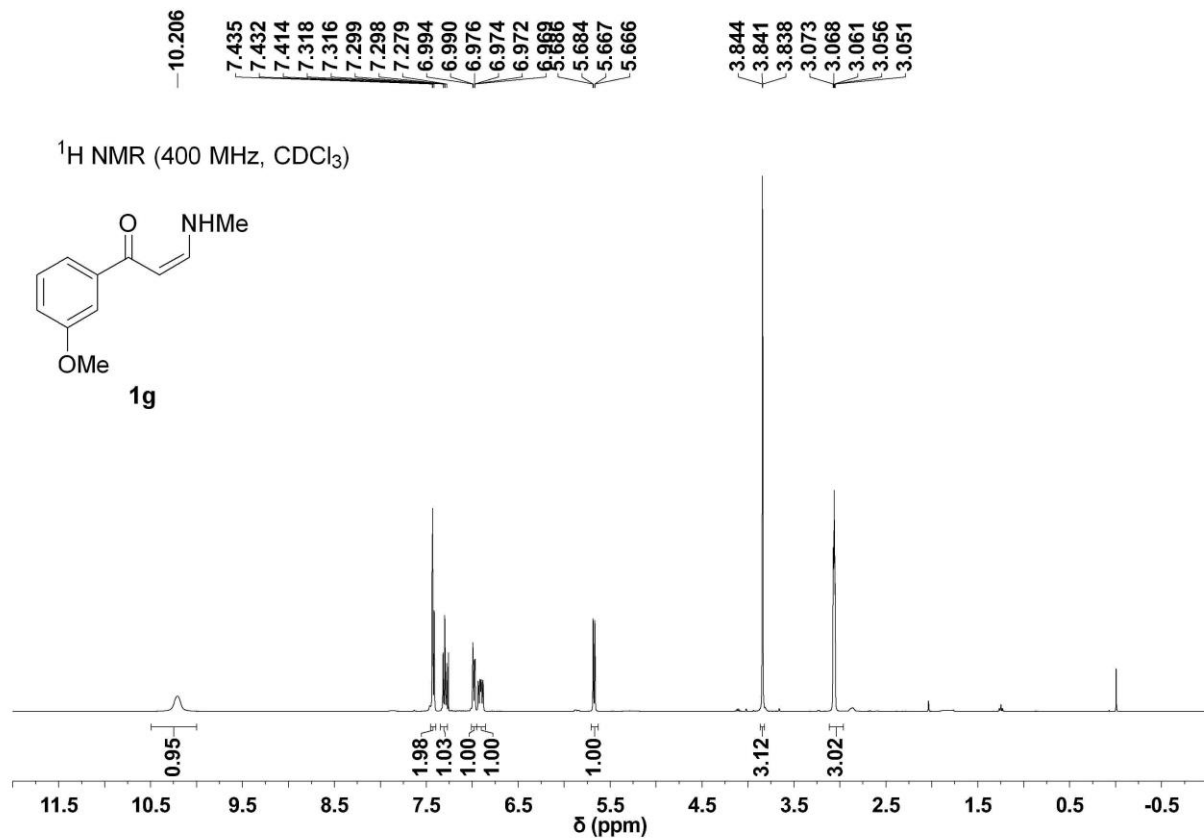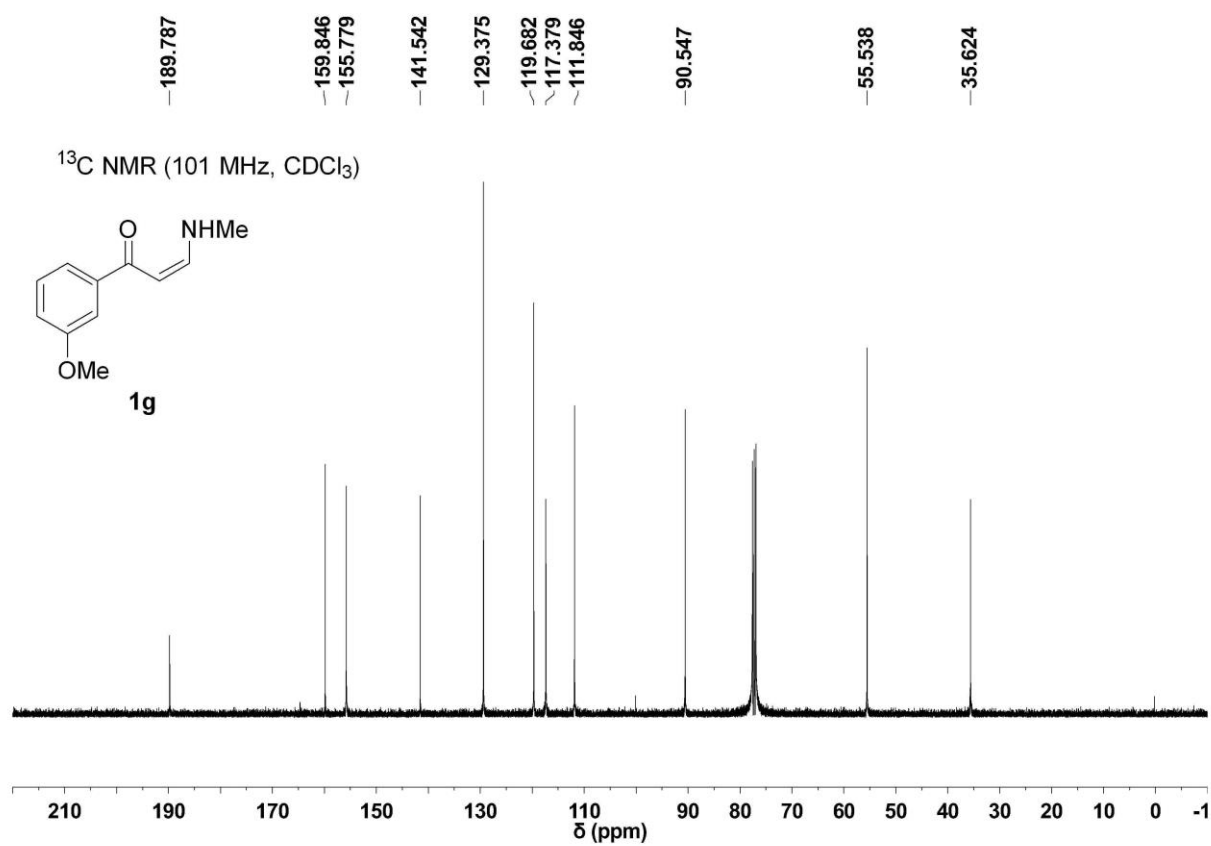

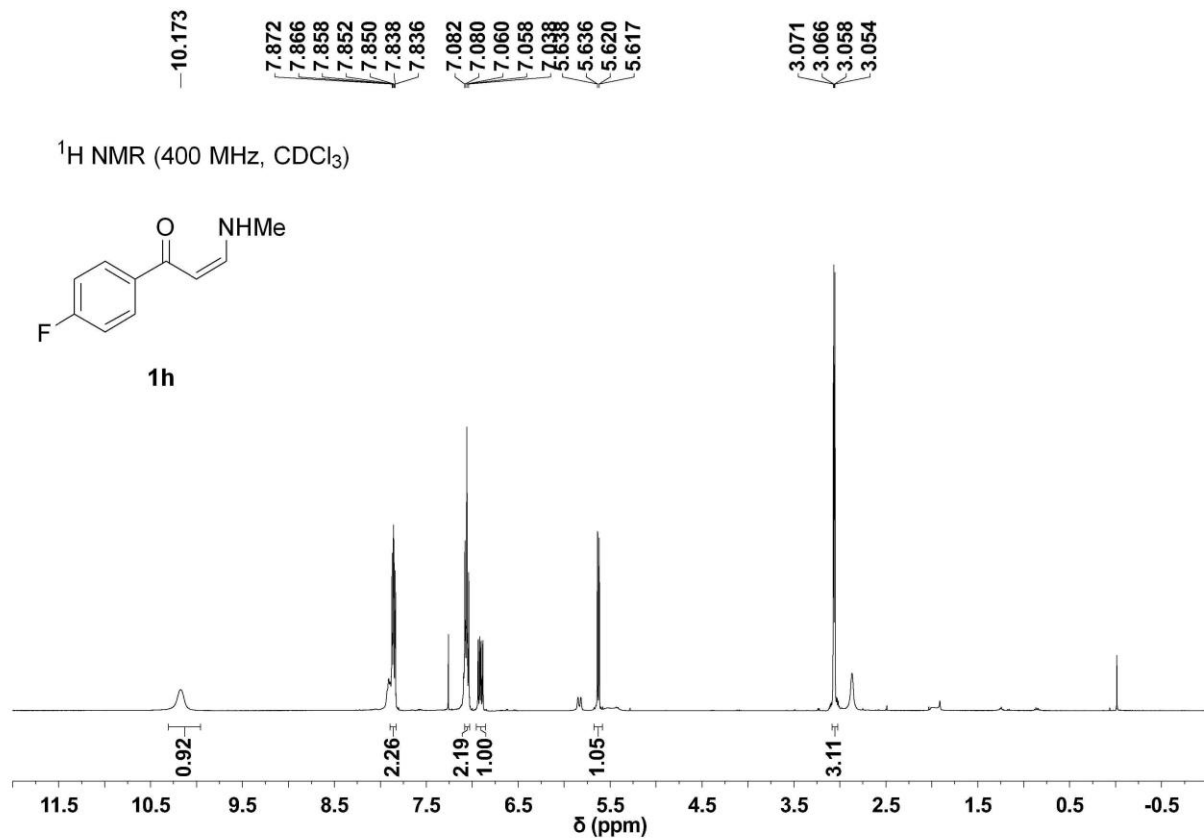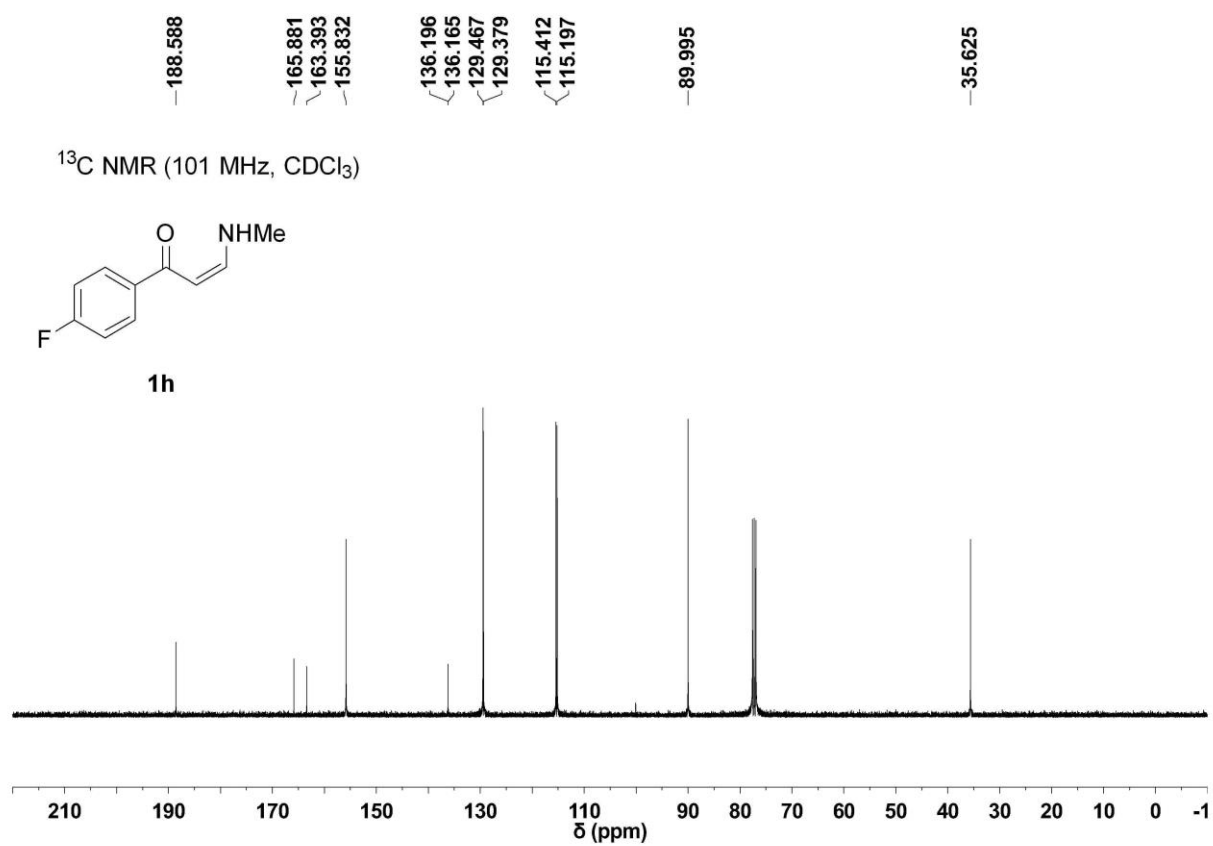

--109.750

$^{19}\text{F}$  NMR (471 MHz,  $\text{CDCl}_3$ )

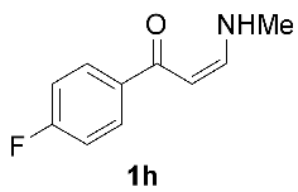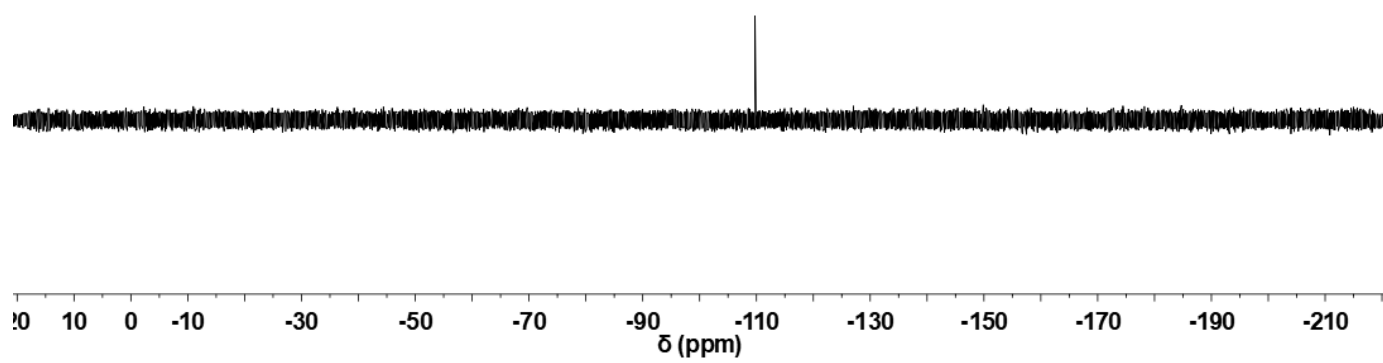



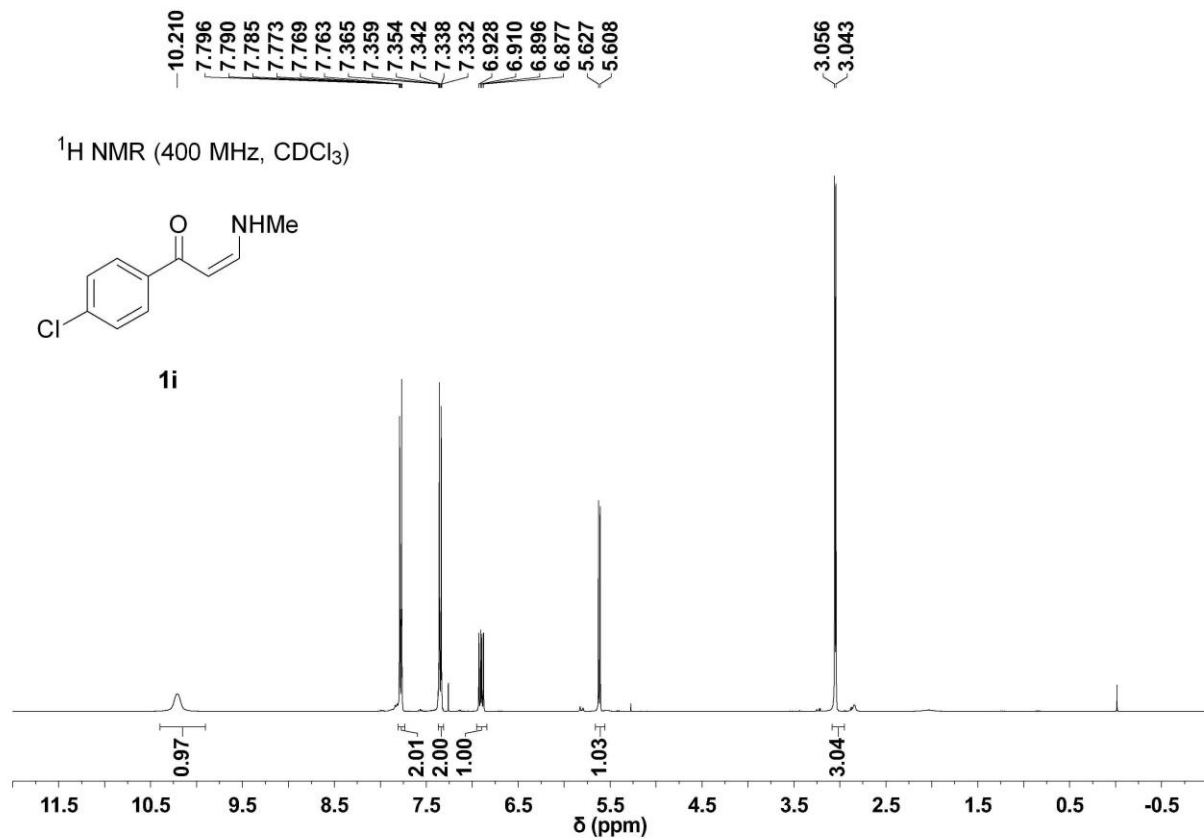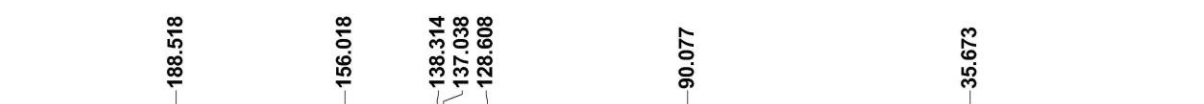

<sup>13</sup>C NMR (101 MHz, CDCl<sub>3</sub>)

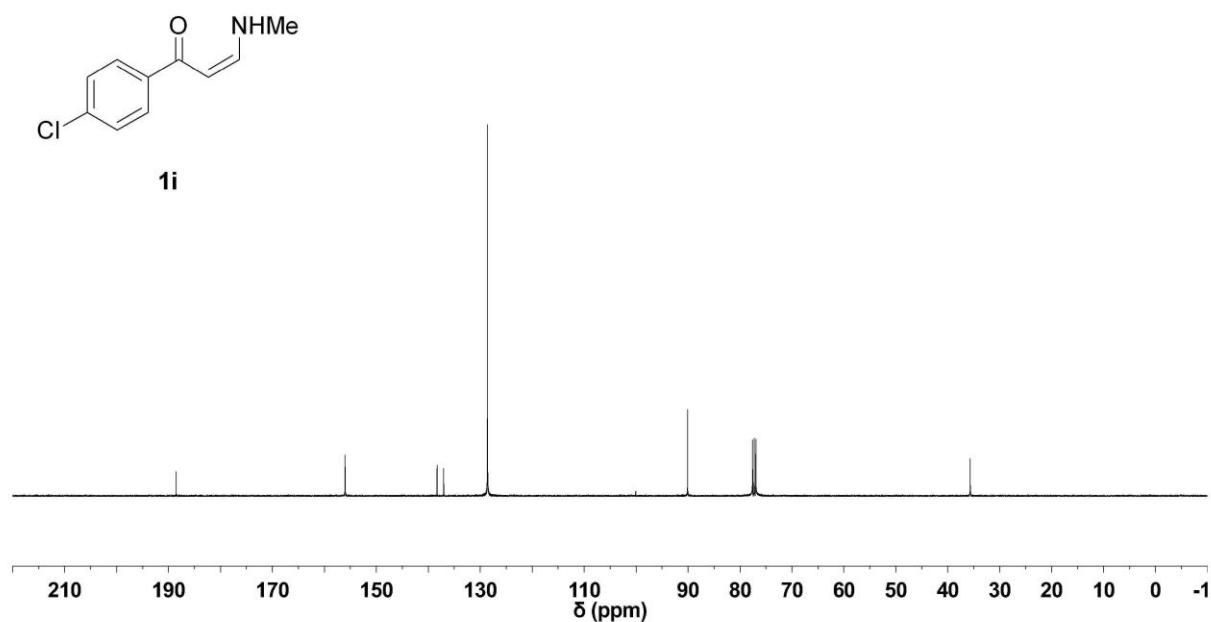

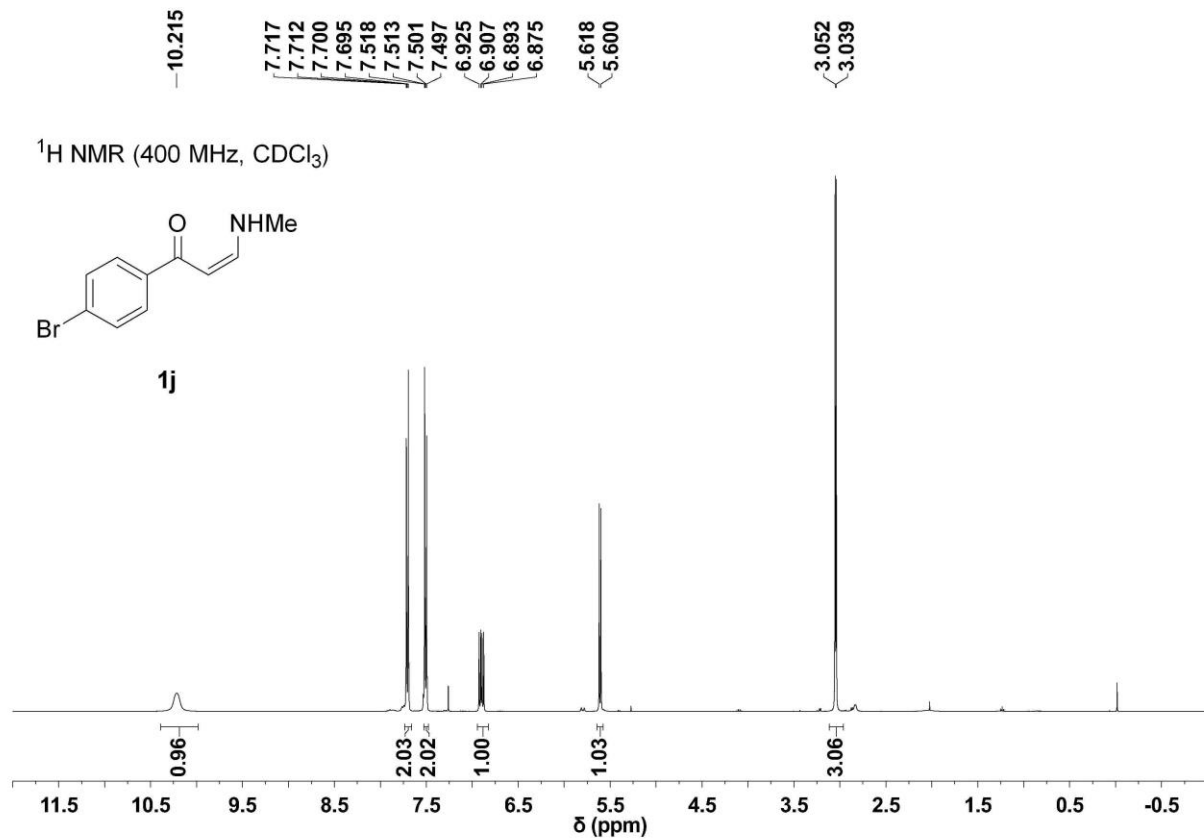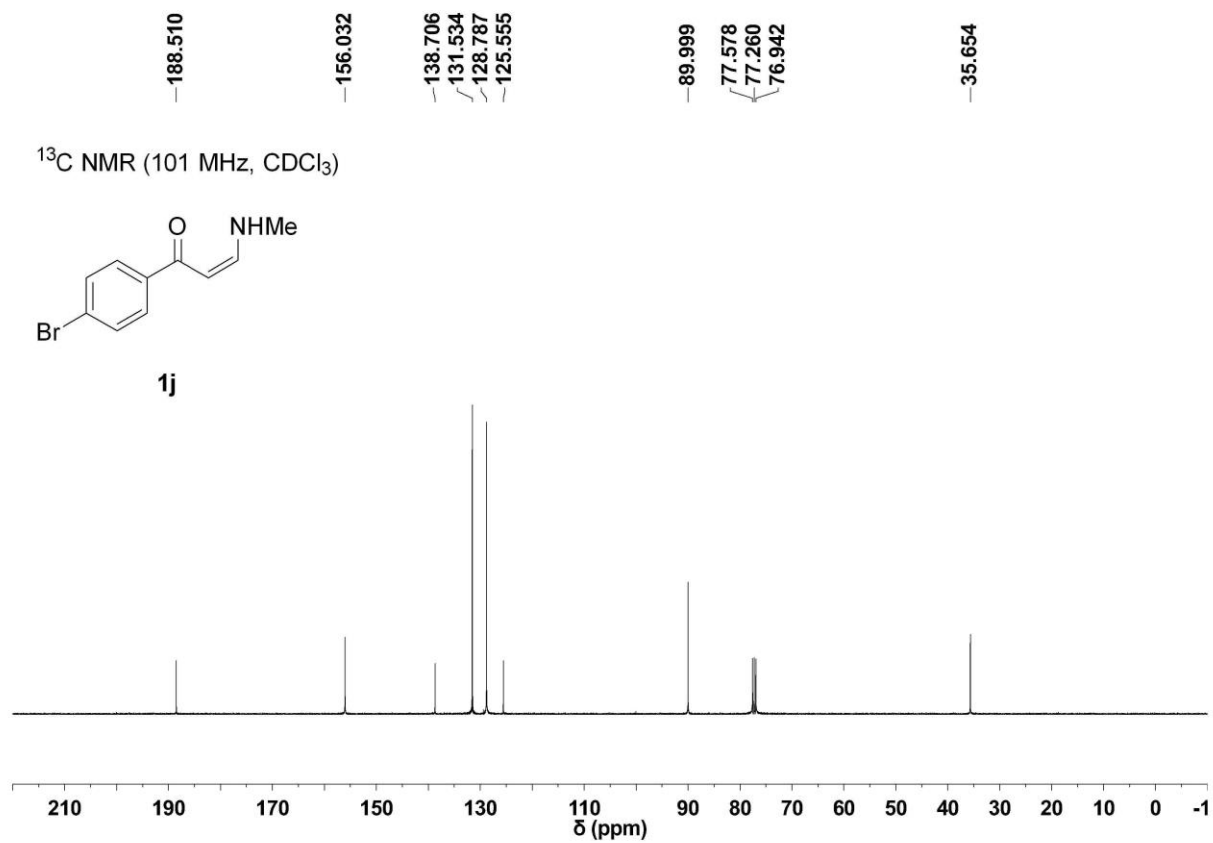

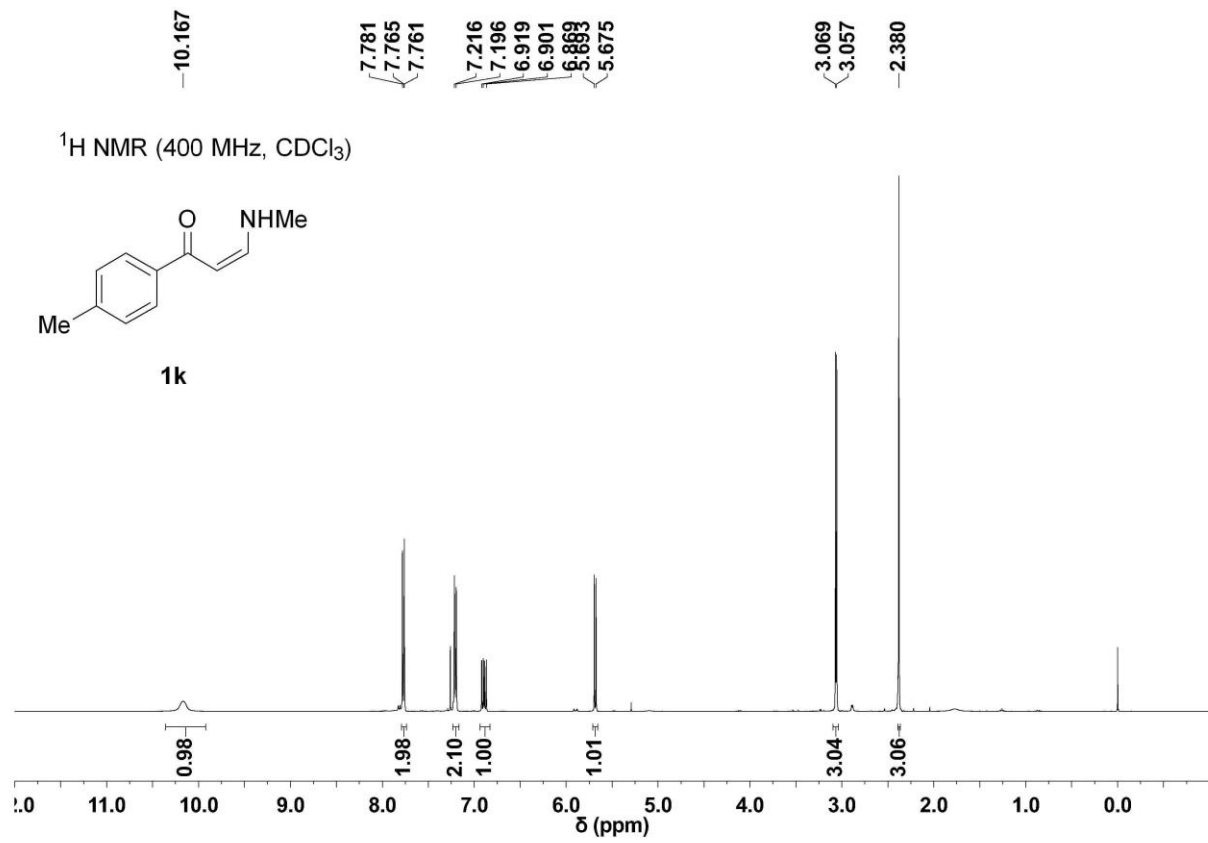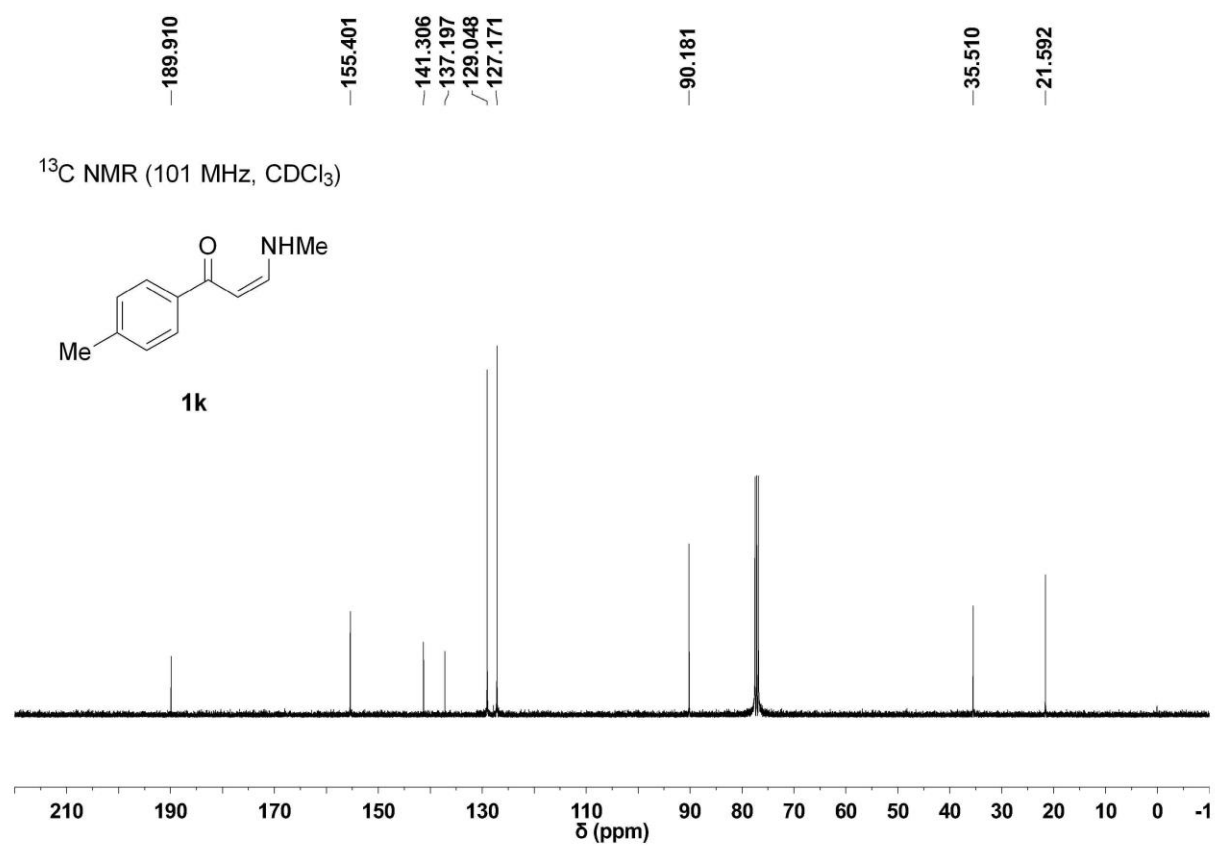

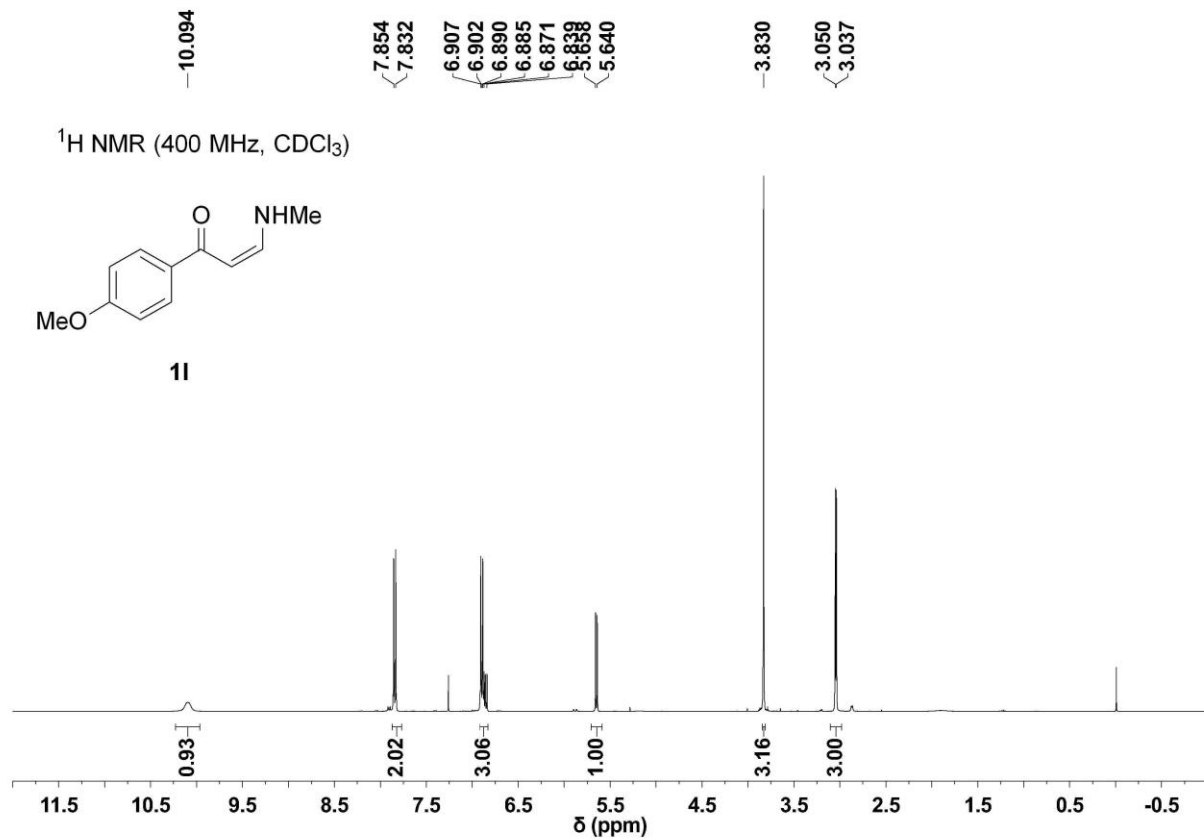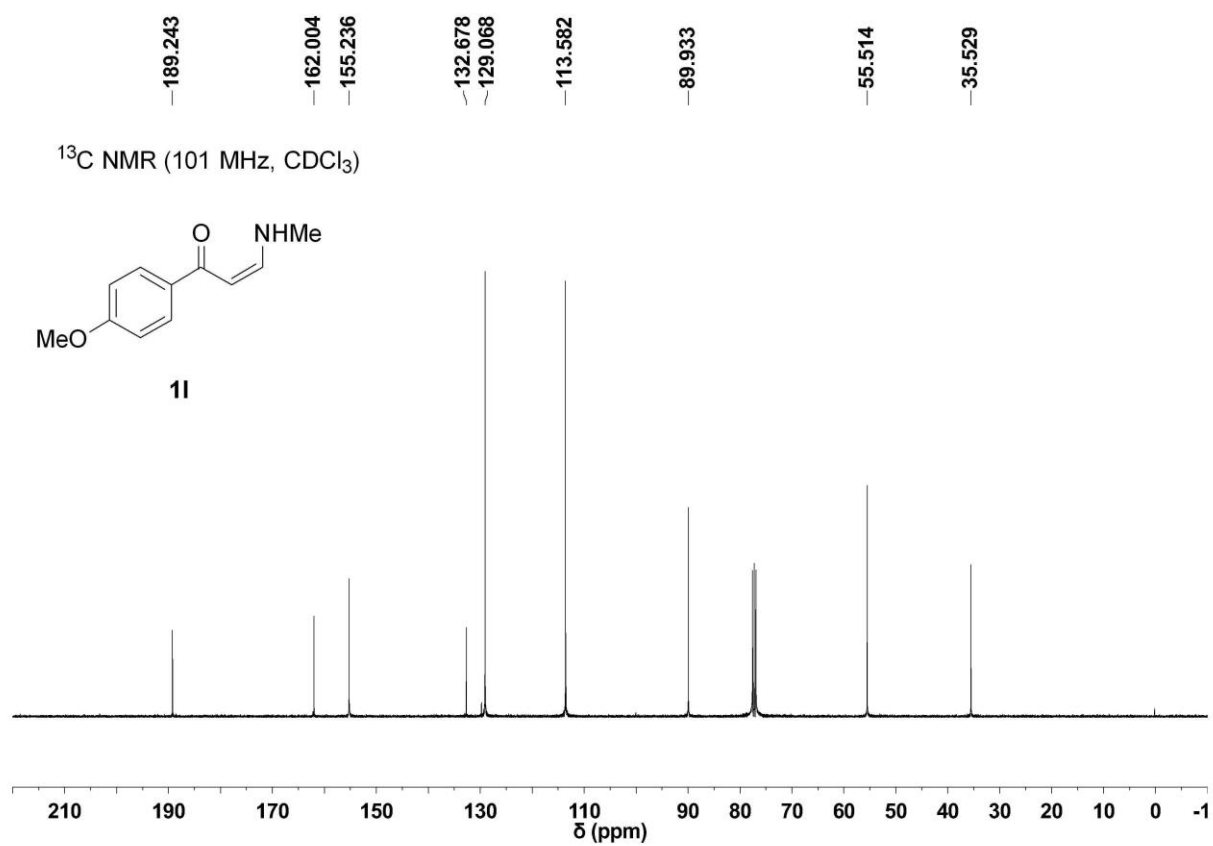

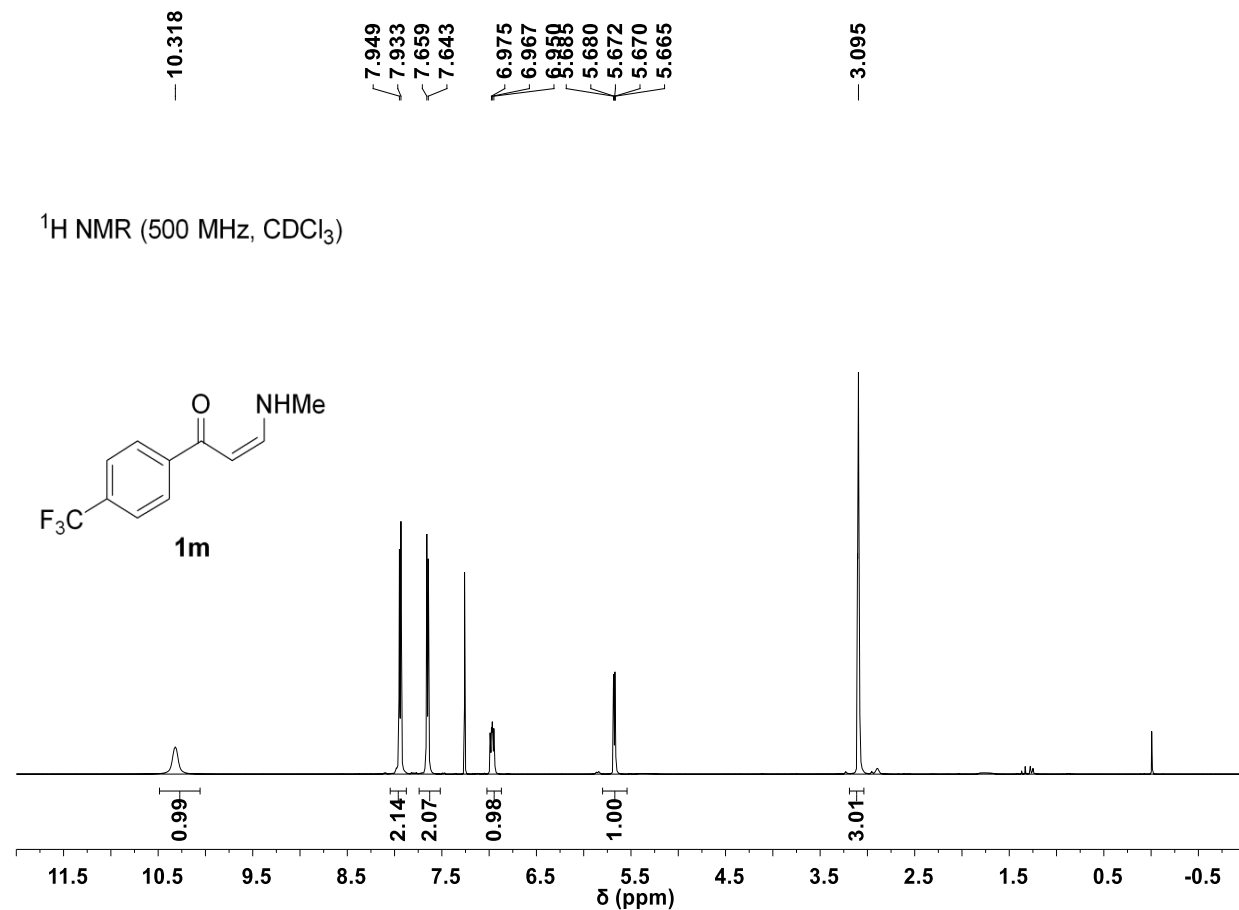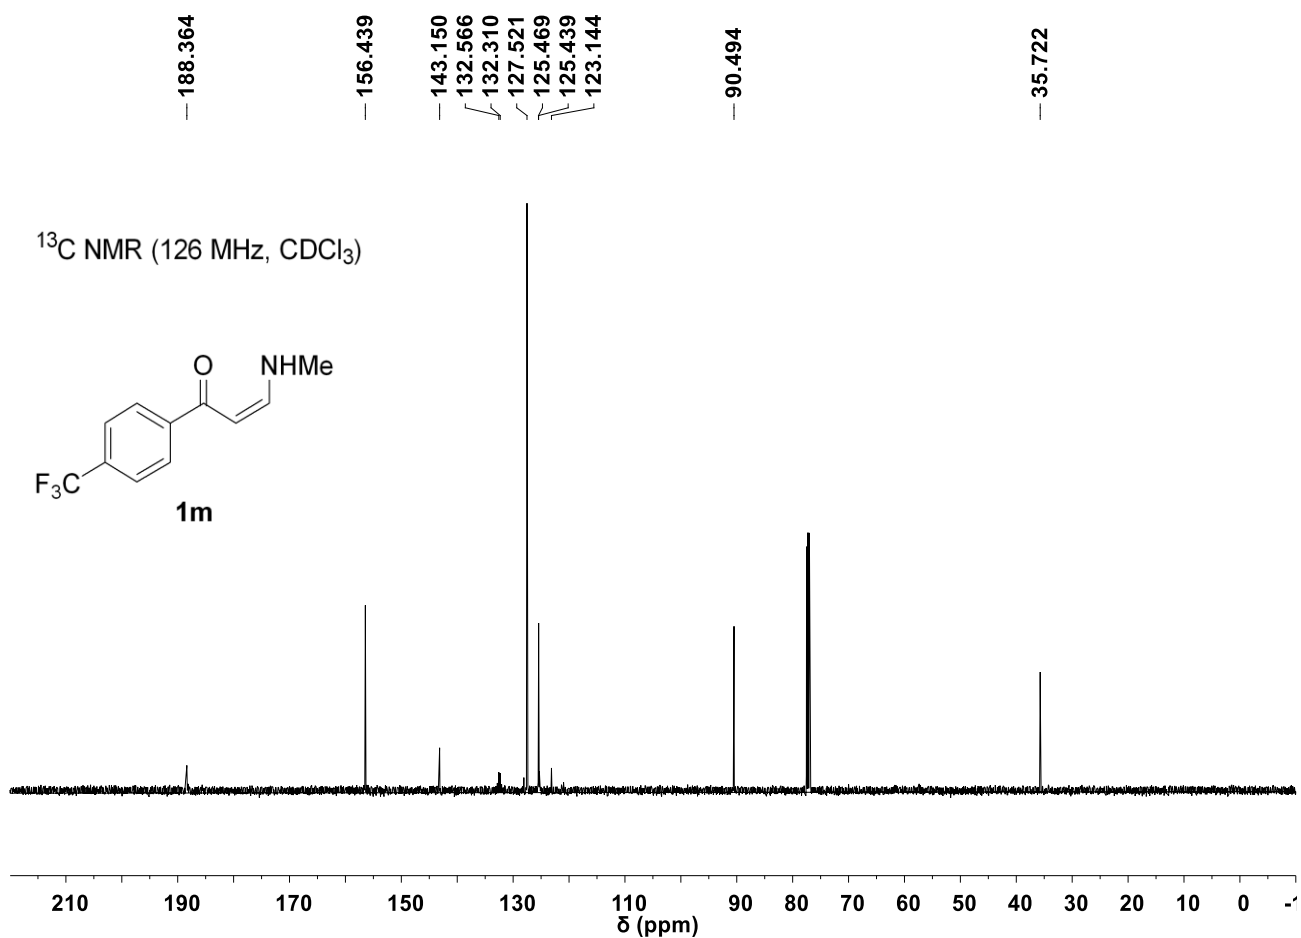

$^{19}\text{F}$  NMR (471 MHz,  $\text{CDCl}_3$ )

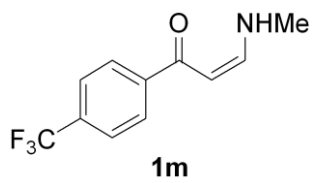

--- -62.747

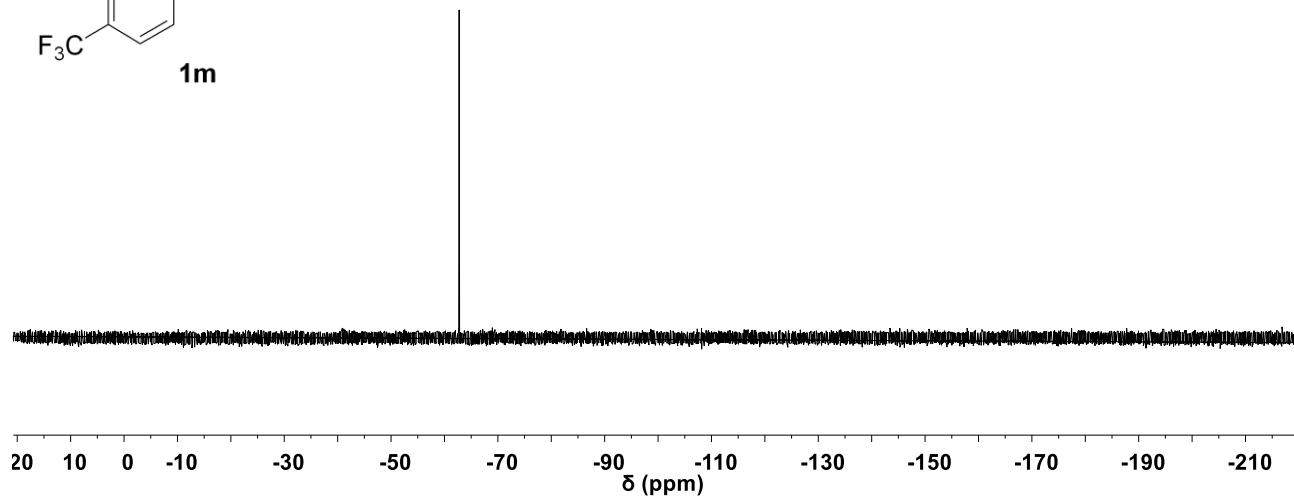

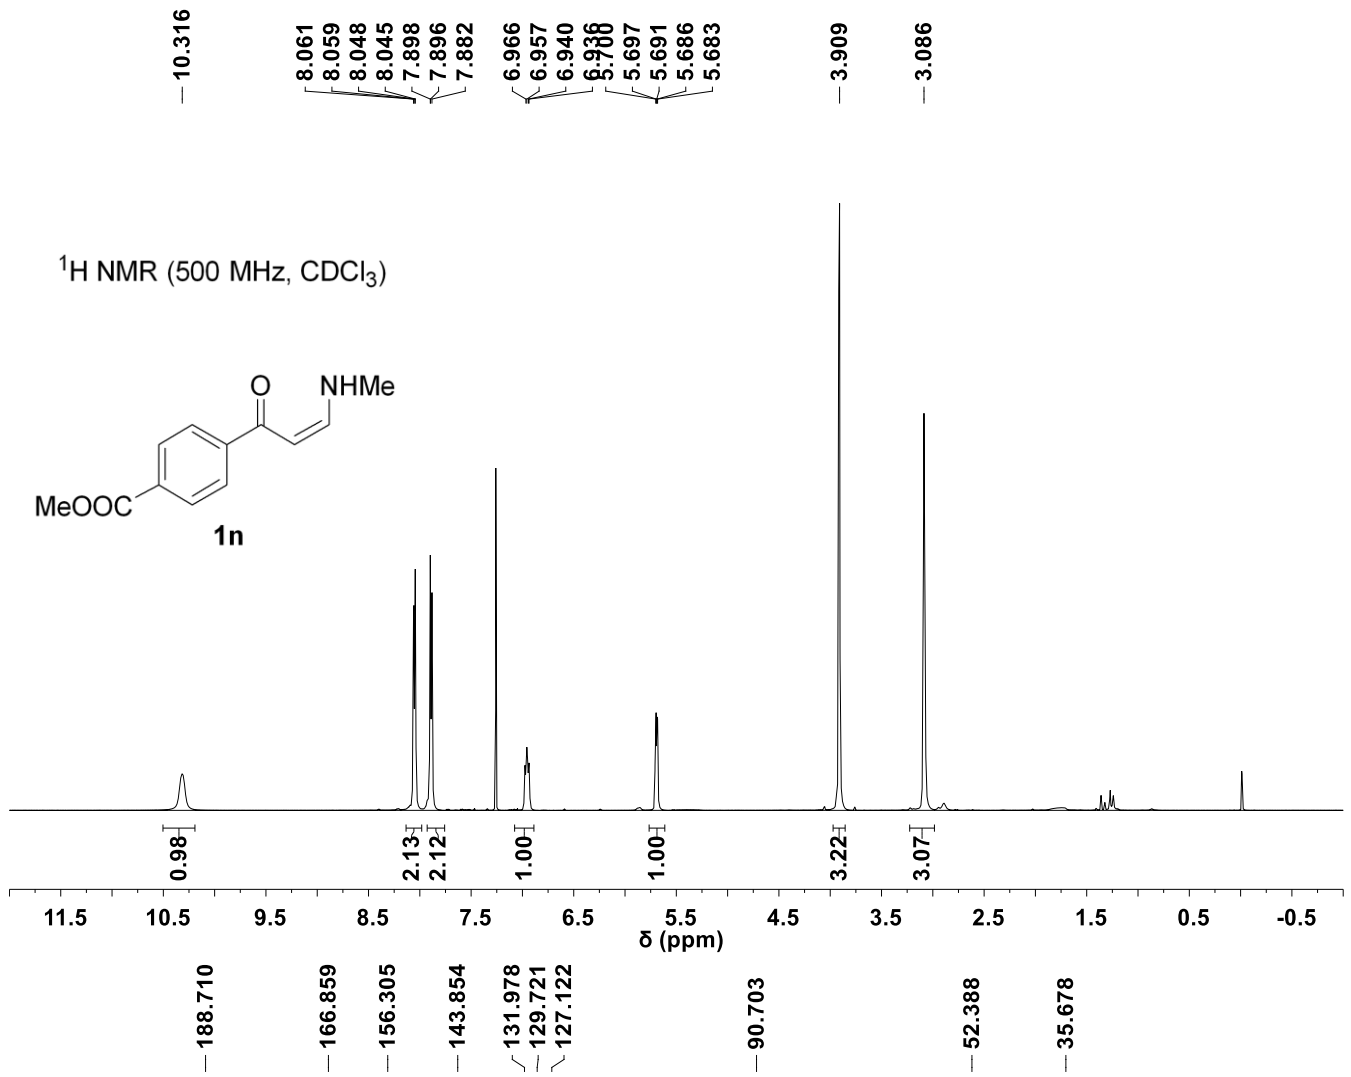

<sup>13</sup>C NMR (126 MHz, CDCl<sub>3</sub>)

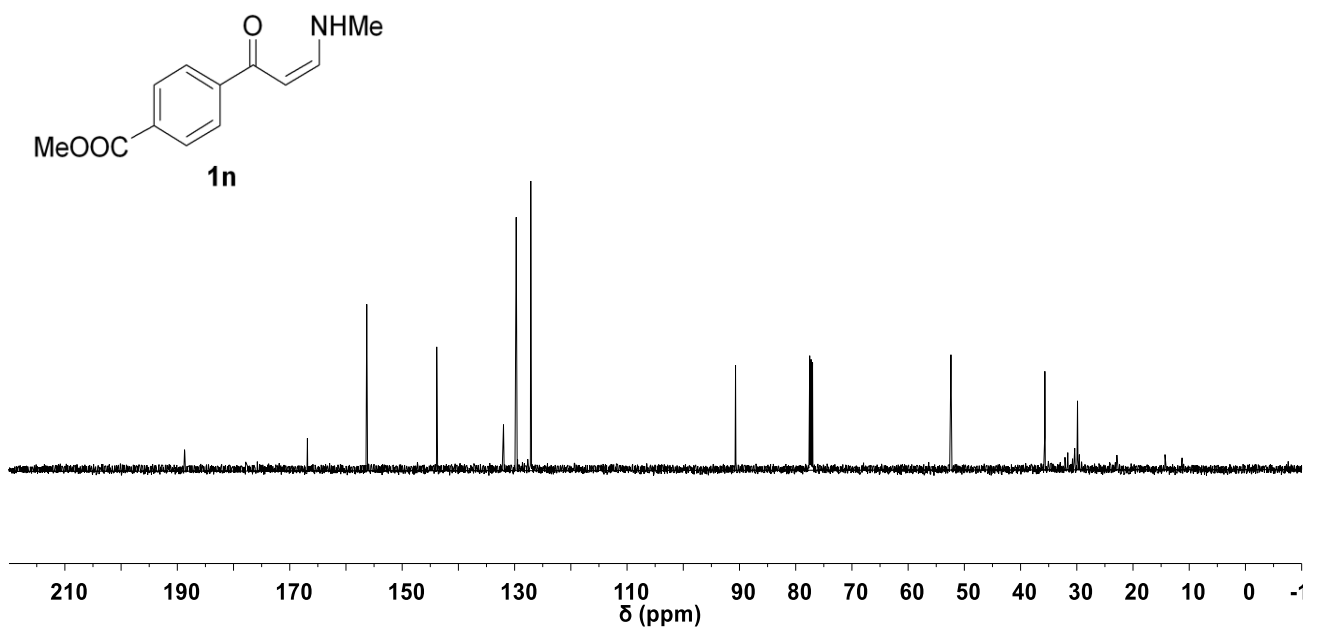

-10.121

7.827  
7.810  
7.398  
7.381  
6.901  
6.887  
6.876  
6.861  
6.700

-3.049

-1.515

$^1\text{H}$  NMR (500 MHz,  $\text{CDCl}_3$ )

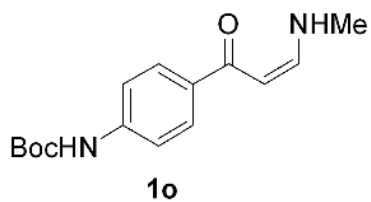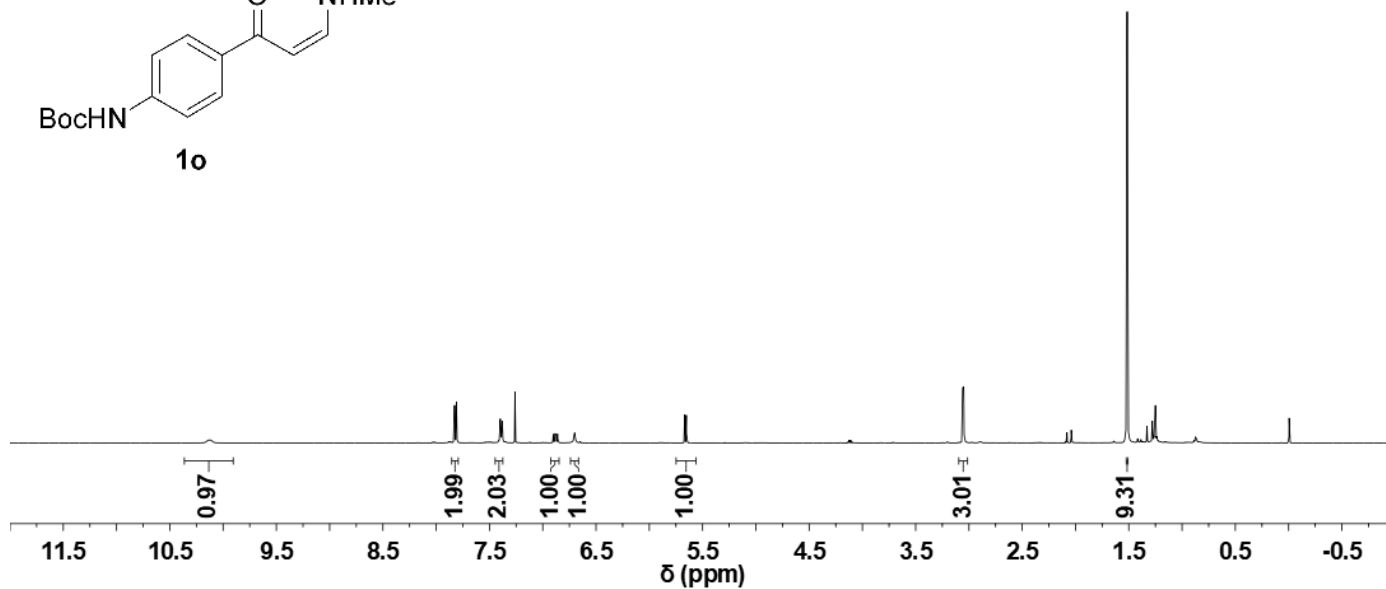

-189.181

~155.430  
~152.658

~141.125  
~134.588  
~128.462

-117.765

-90.147

~35.589  
~29.924  
~28.536

$^{13}\text{C}$  NMR (126 MHz,  $\text{CDCl}_3$ )

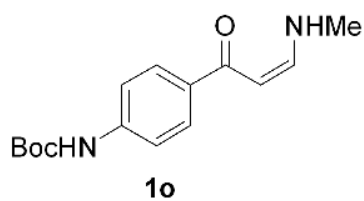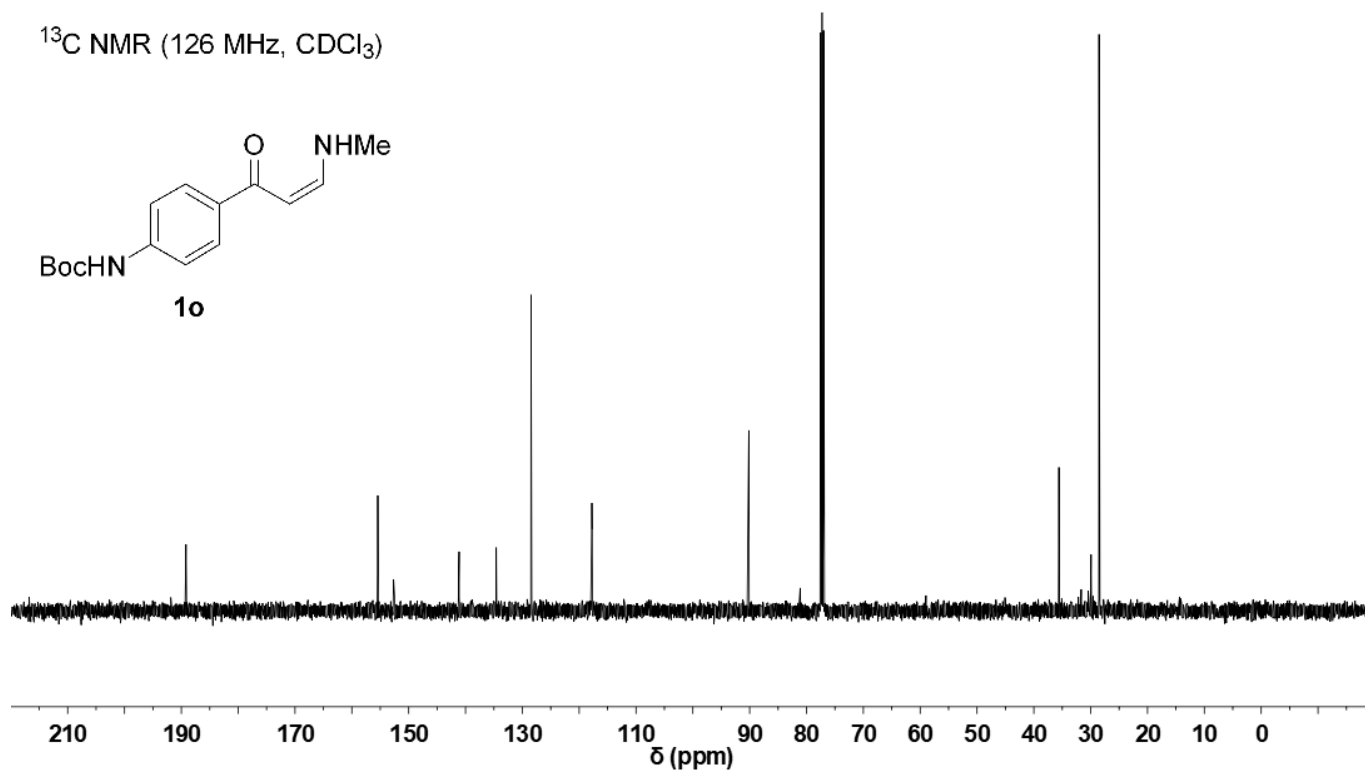



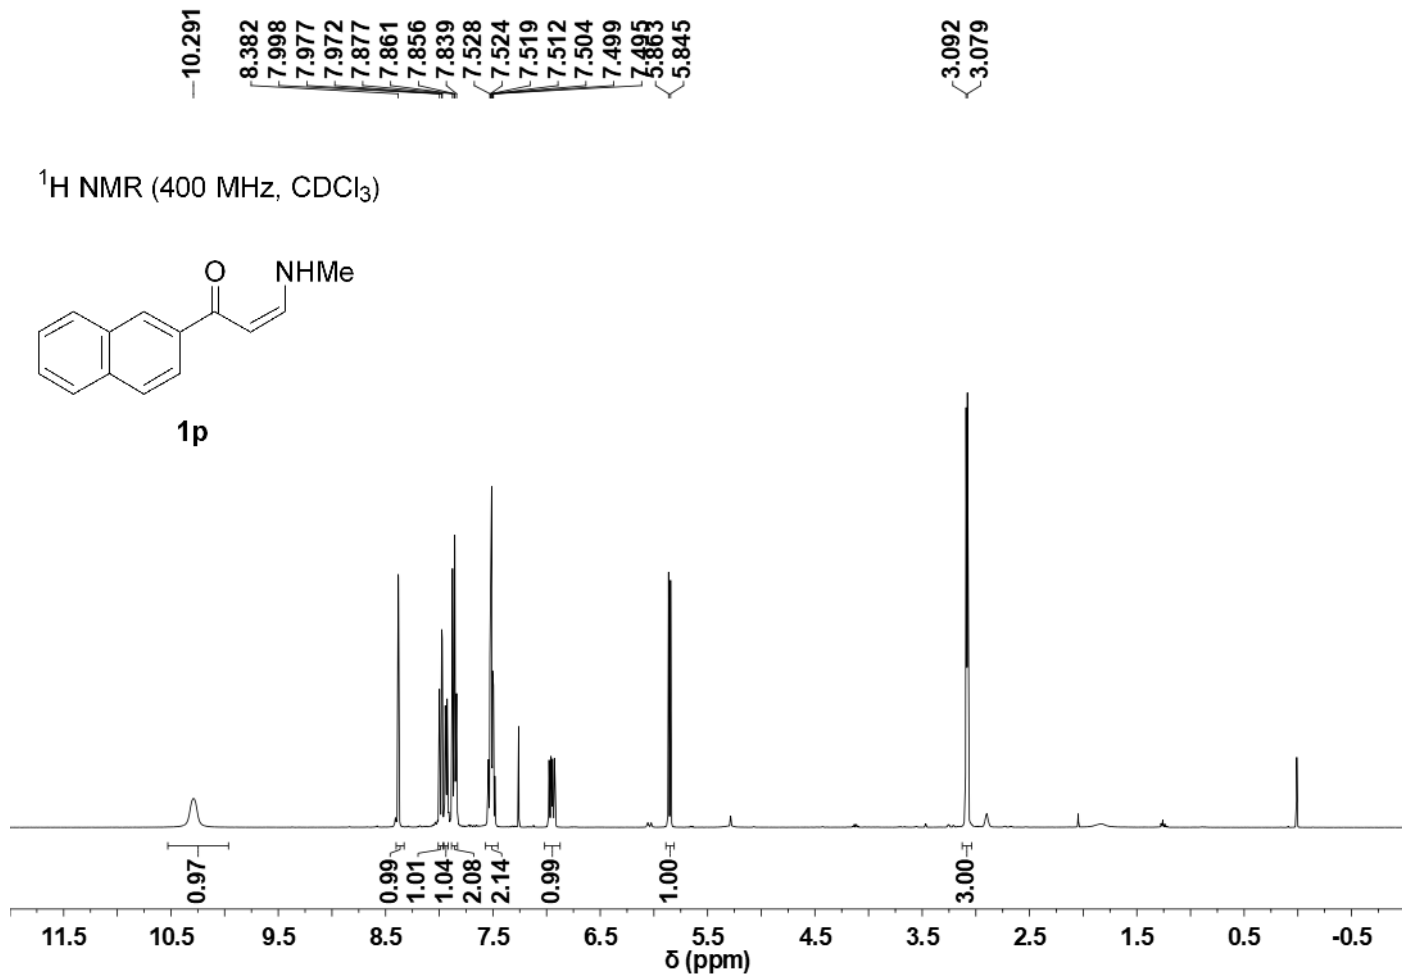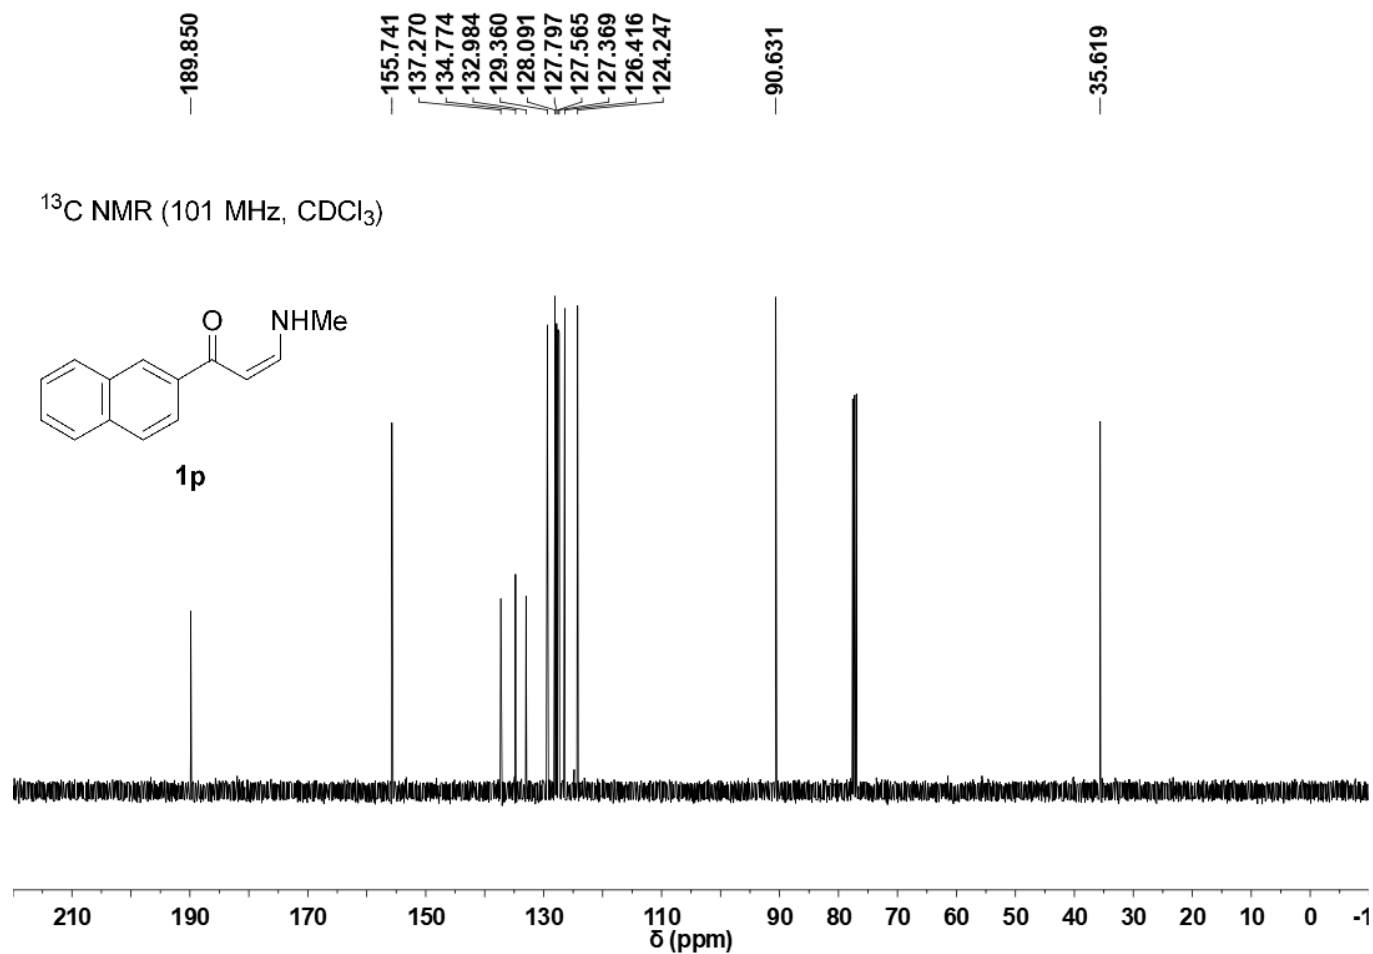

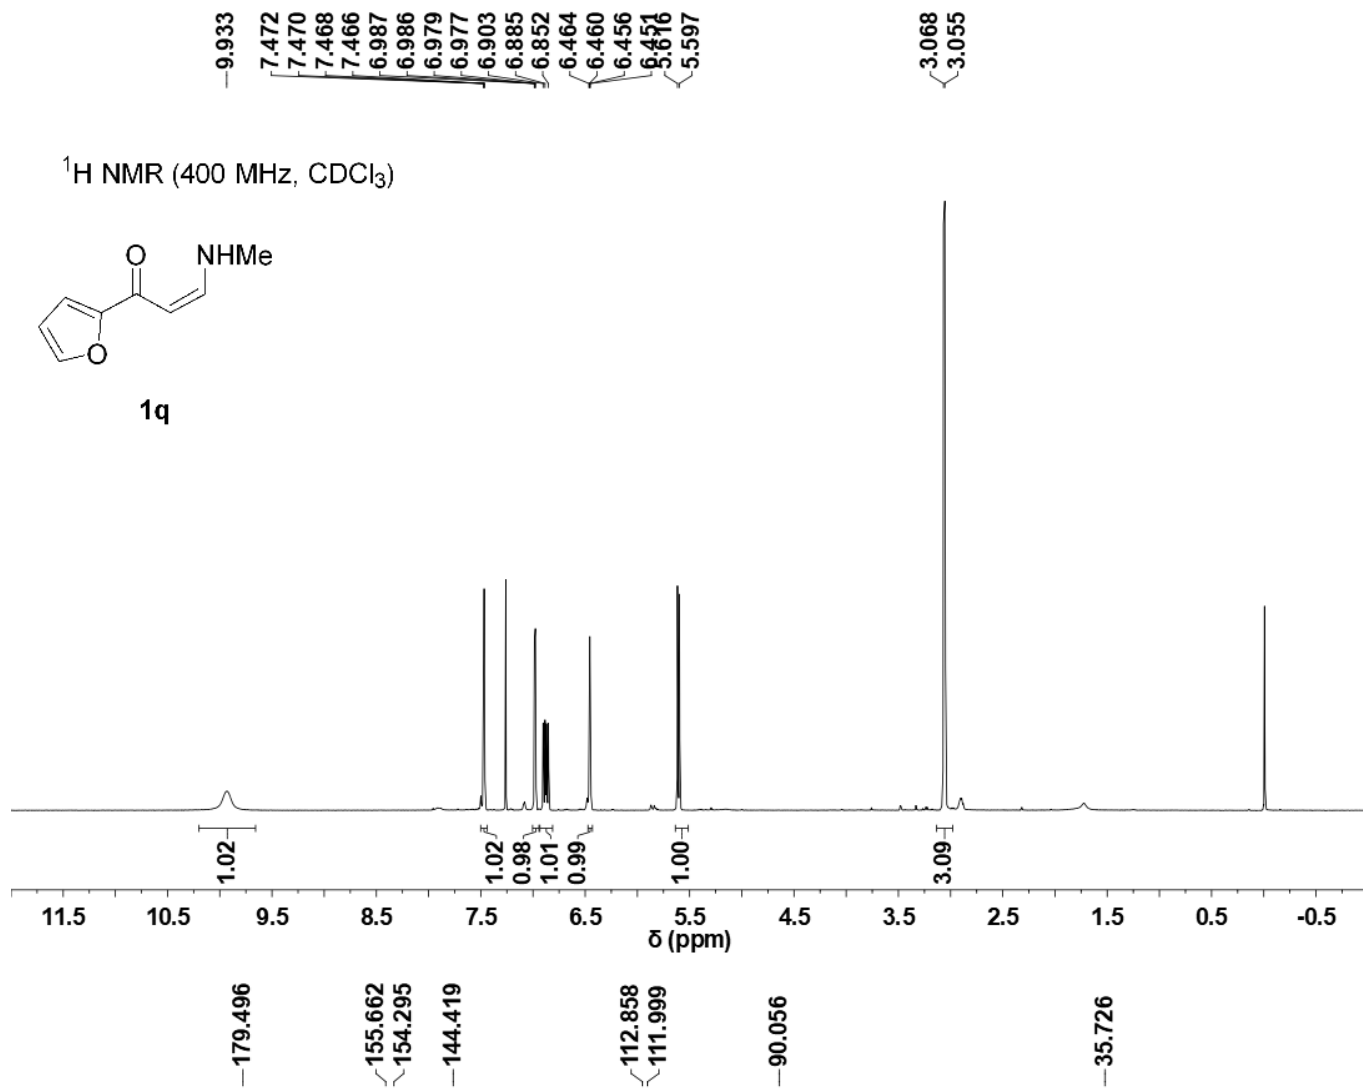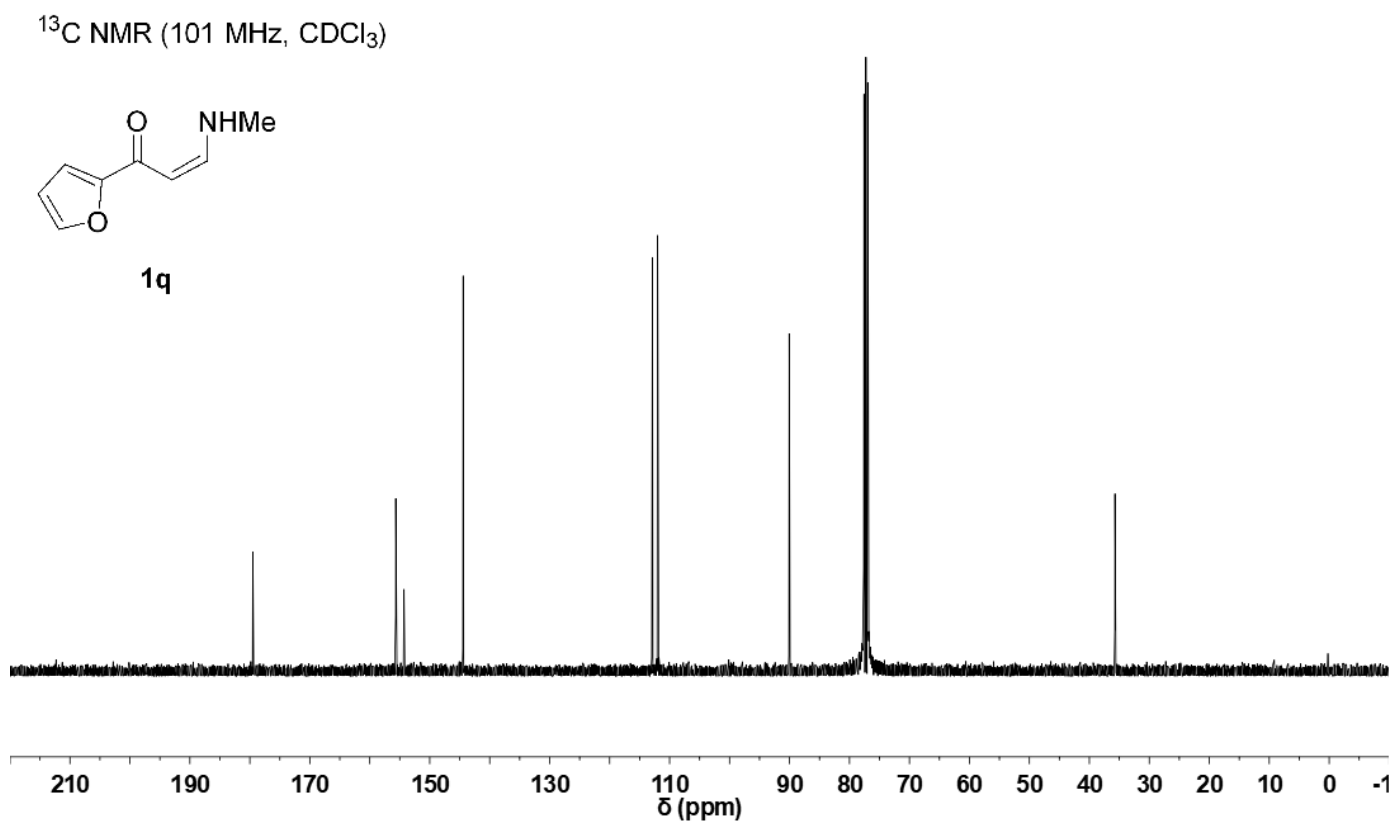

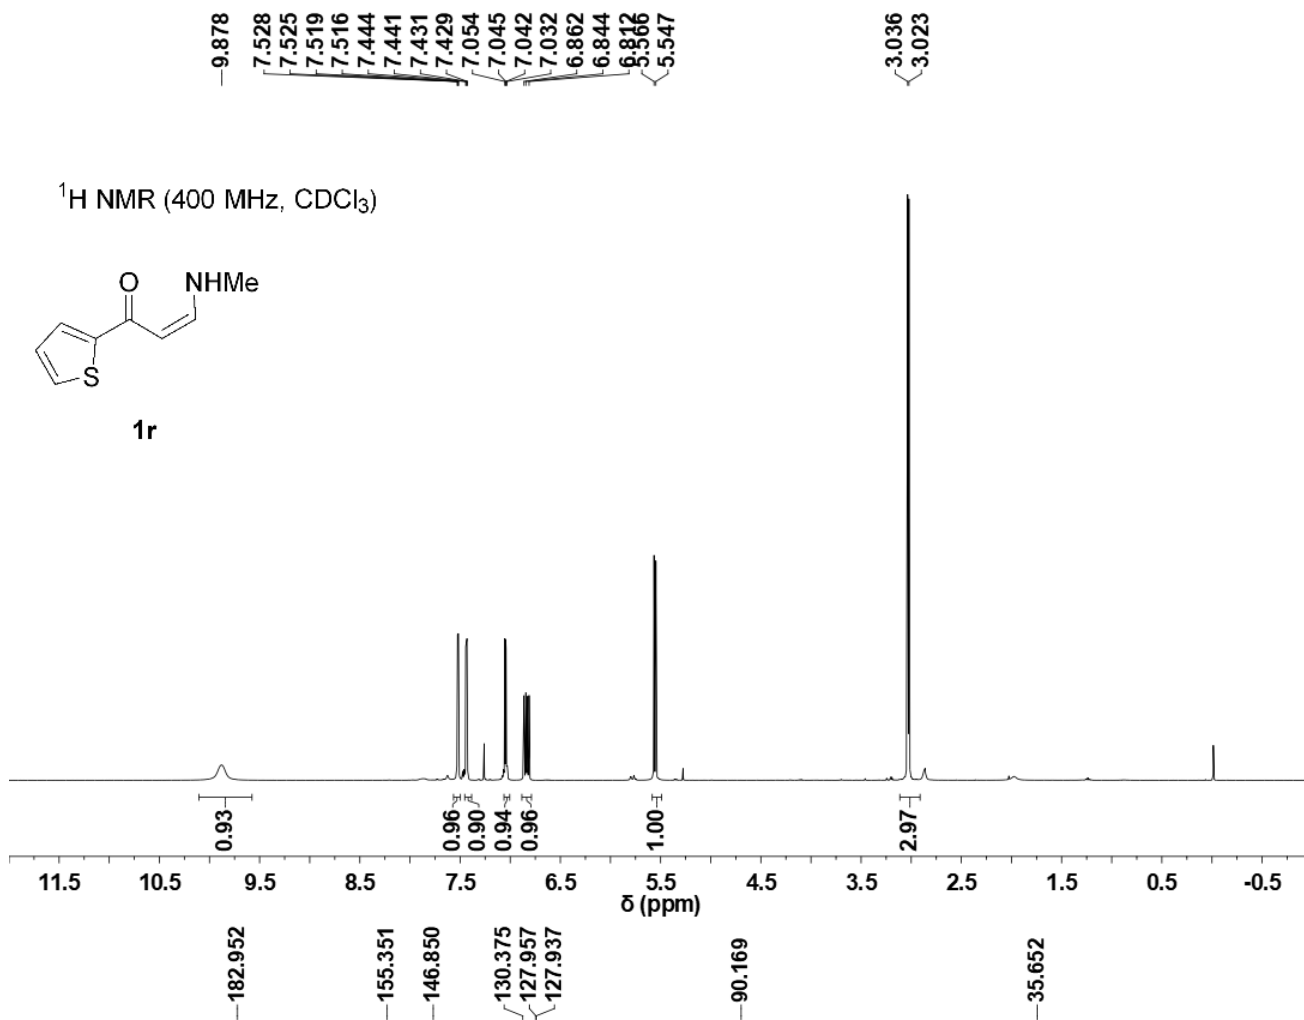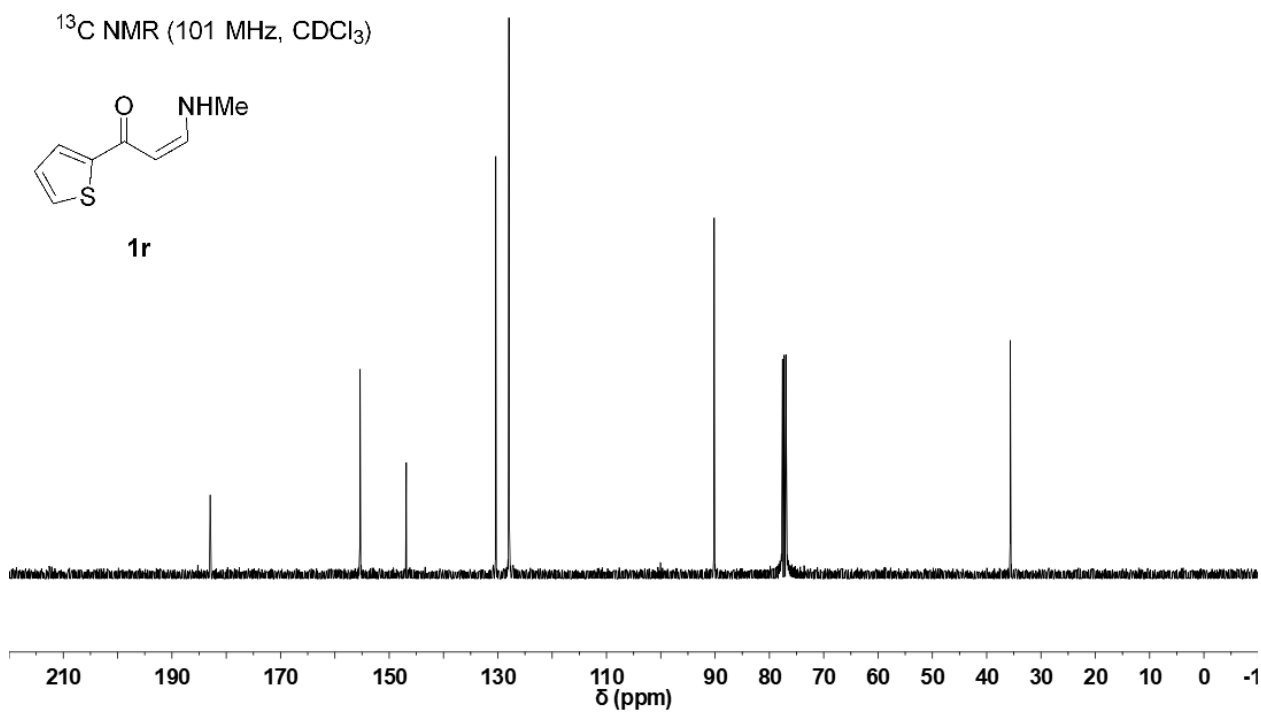

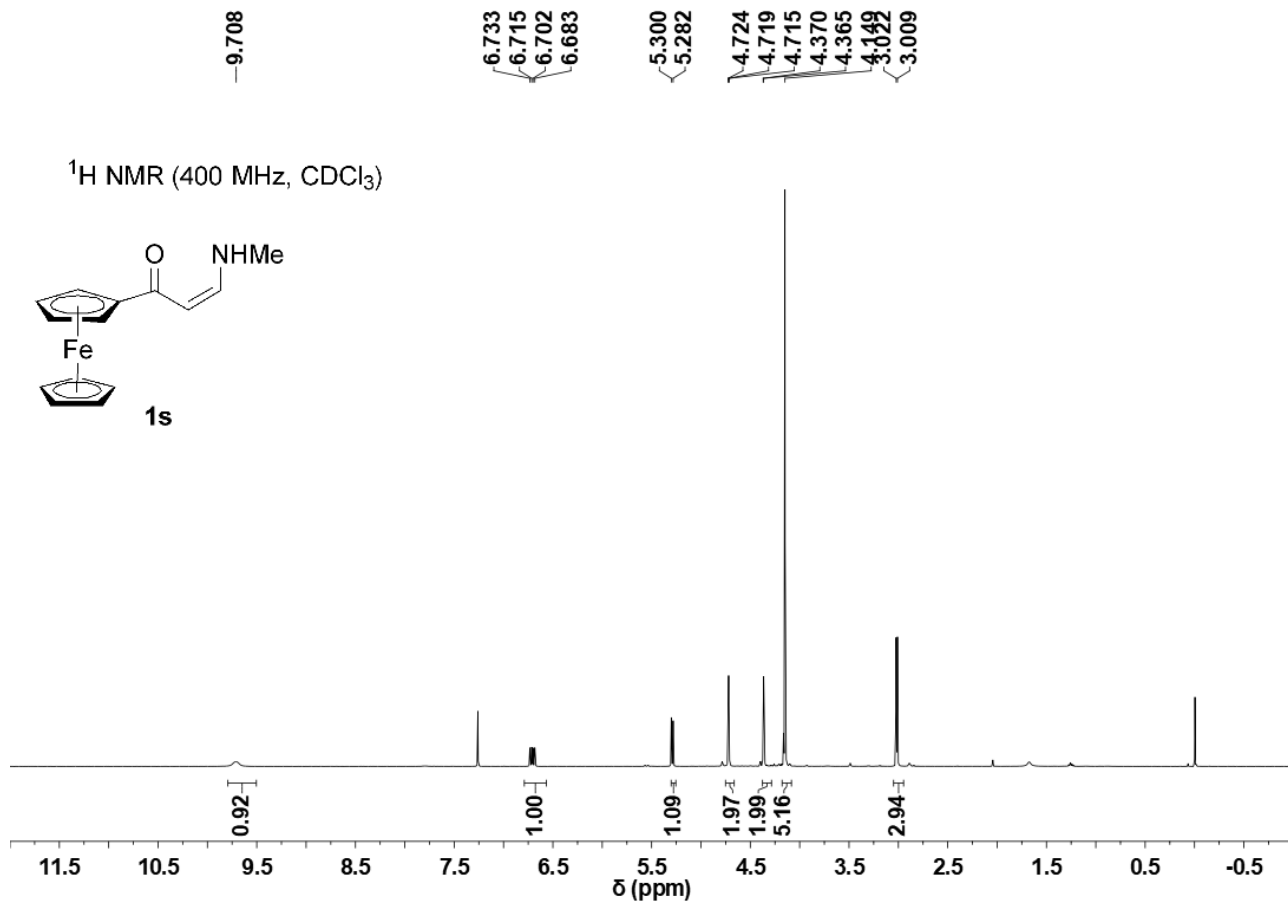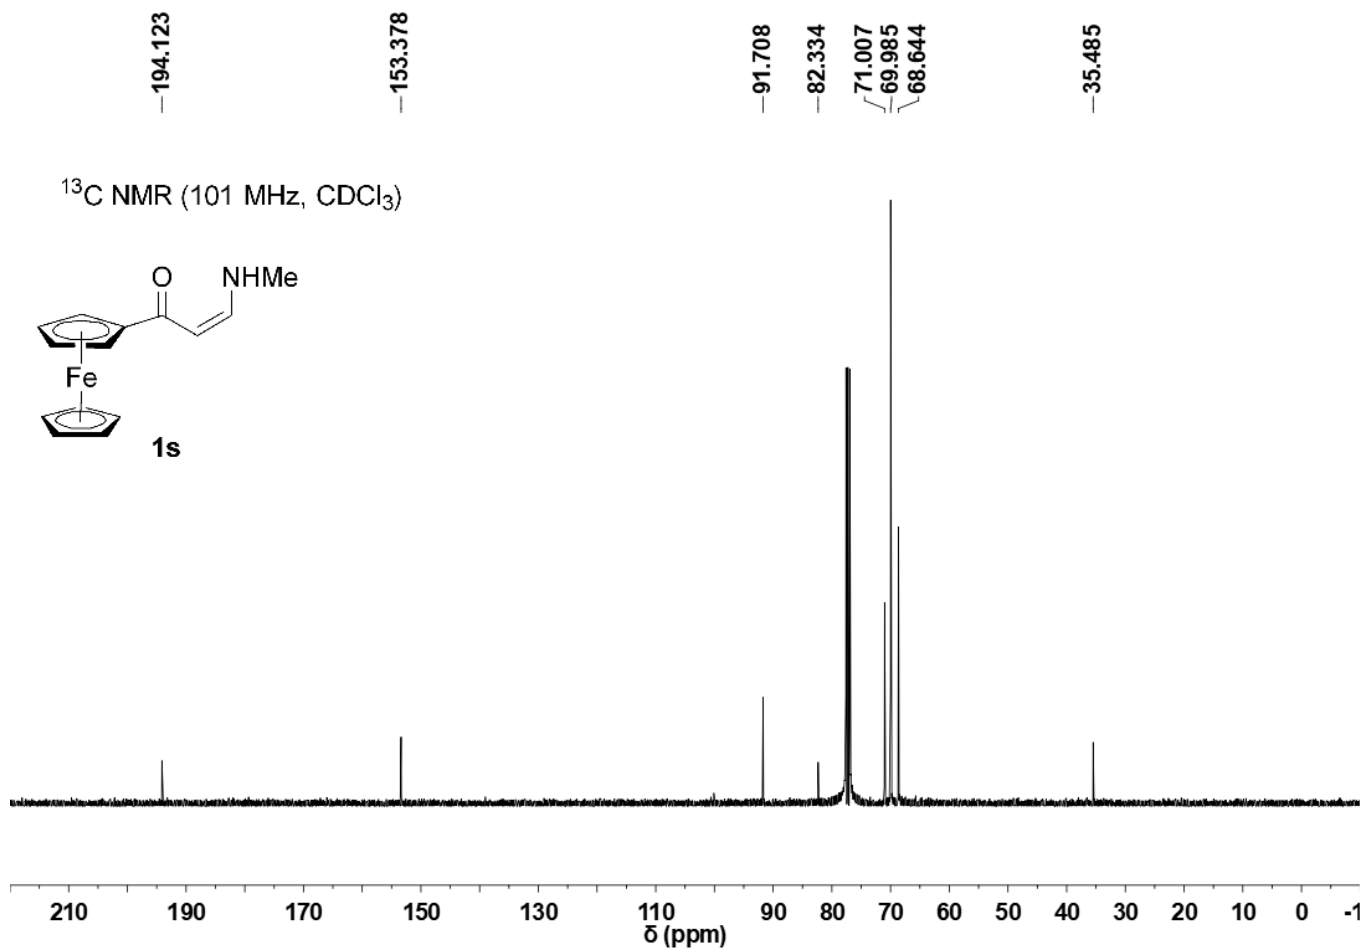

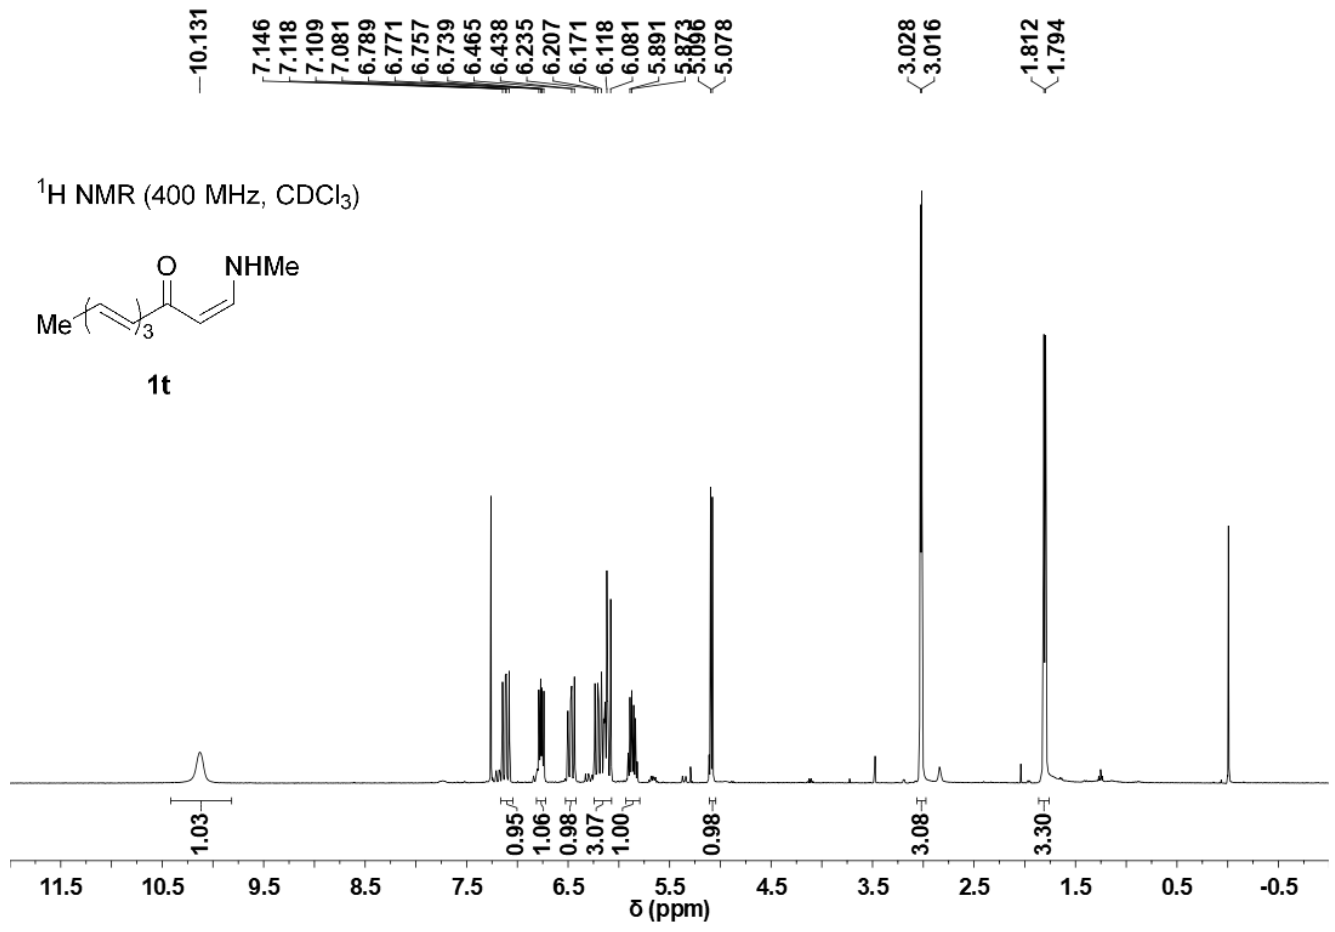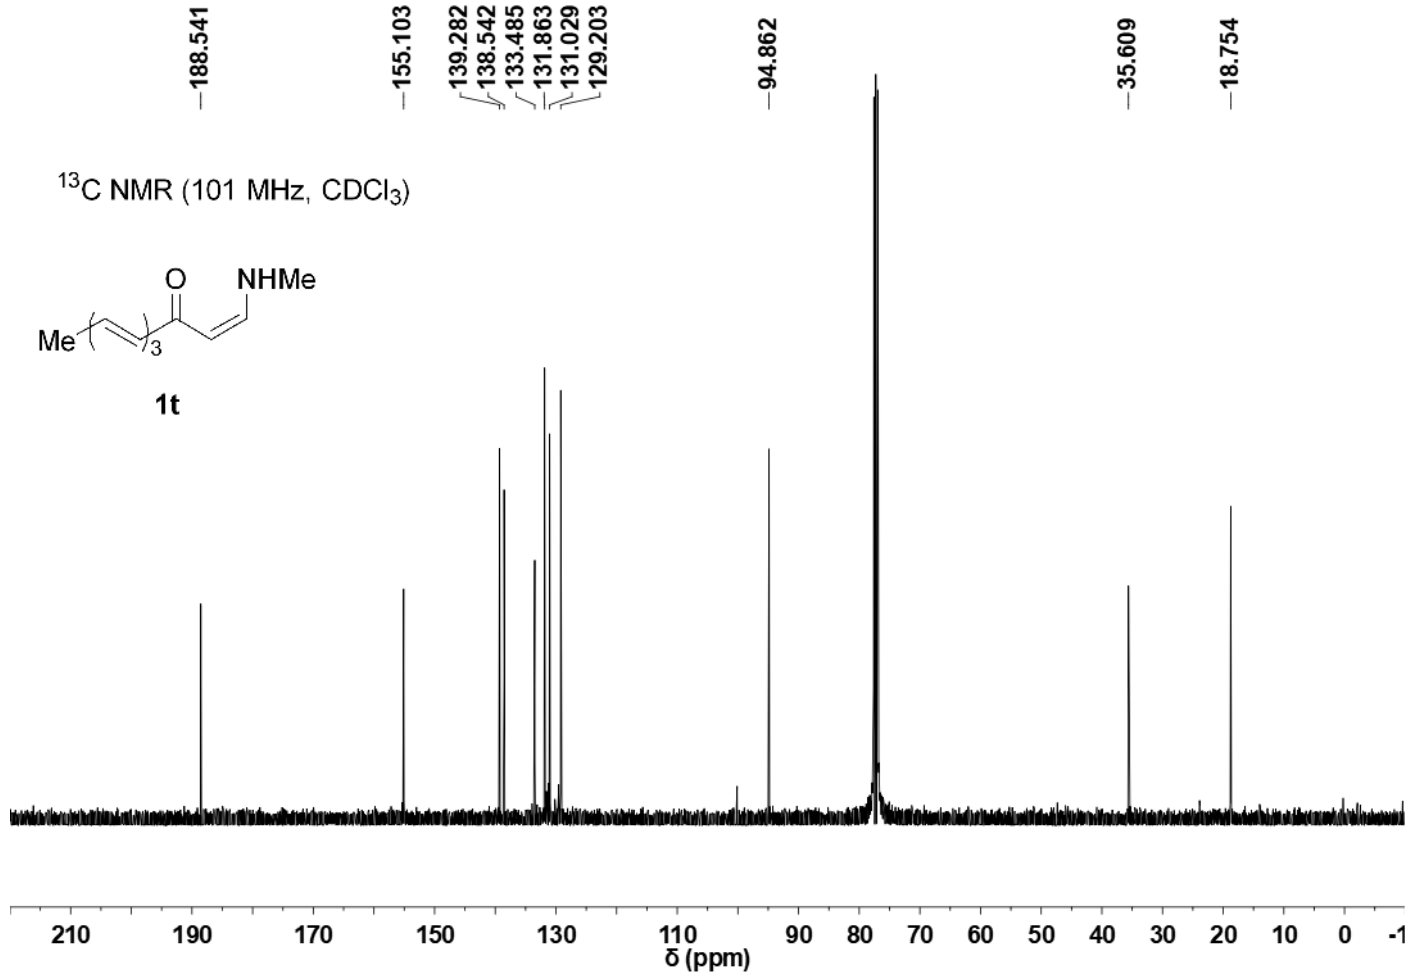

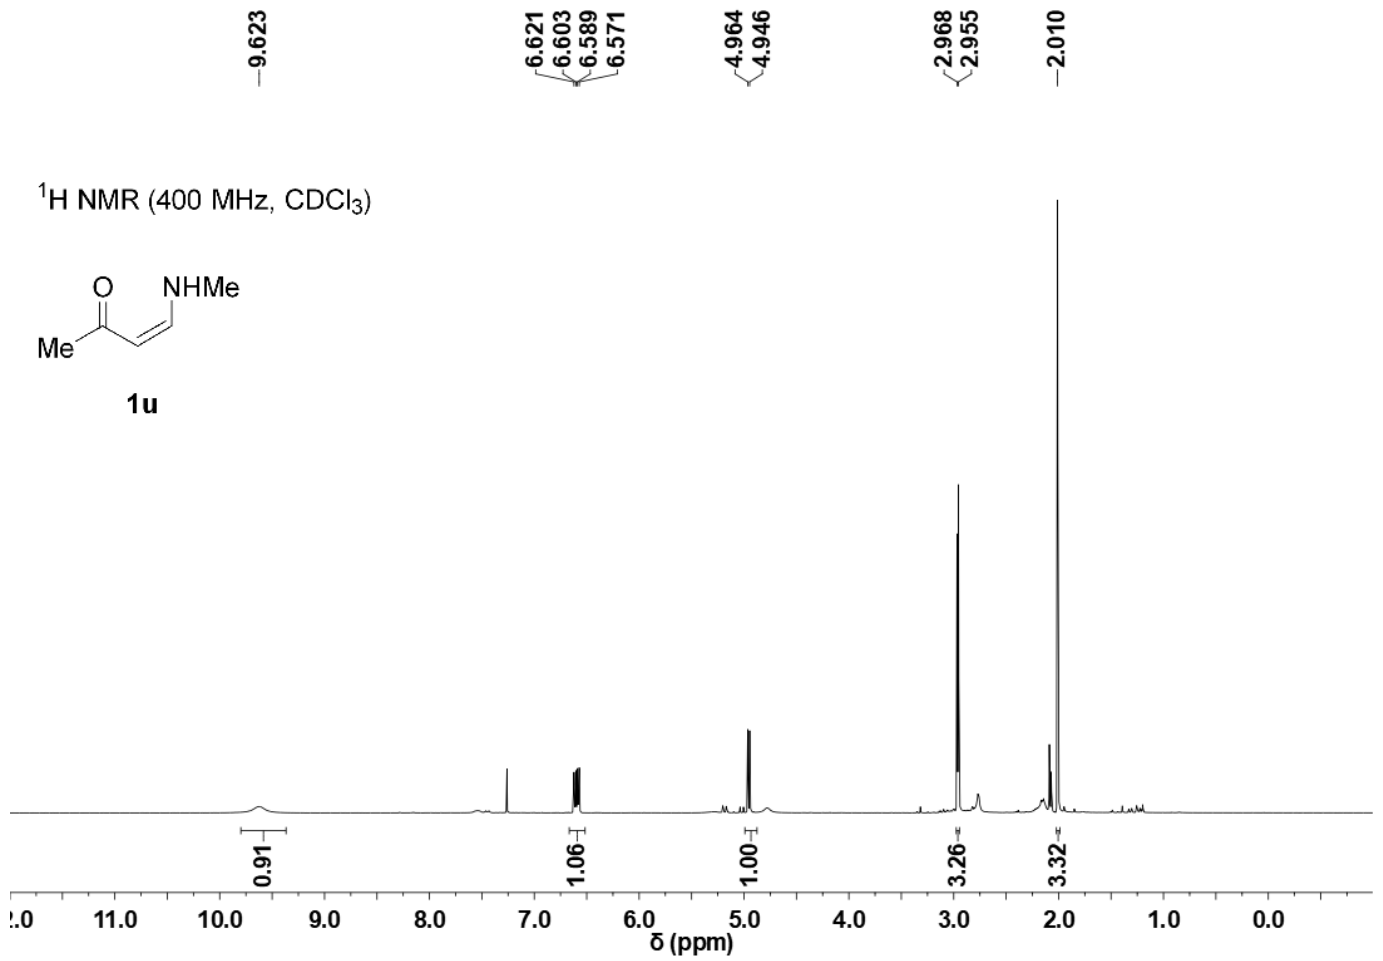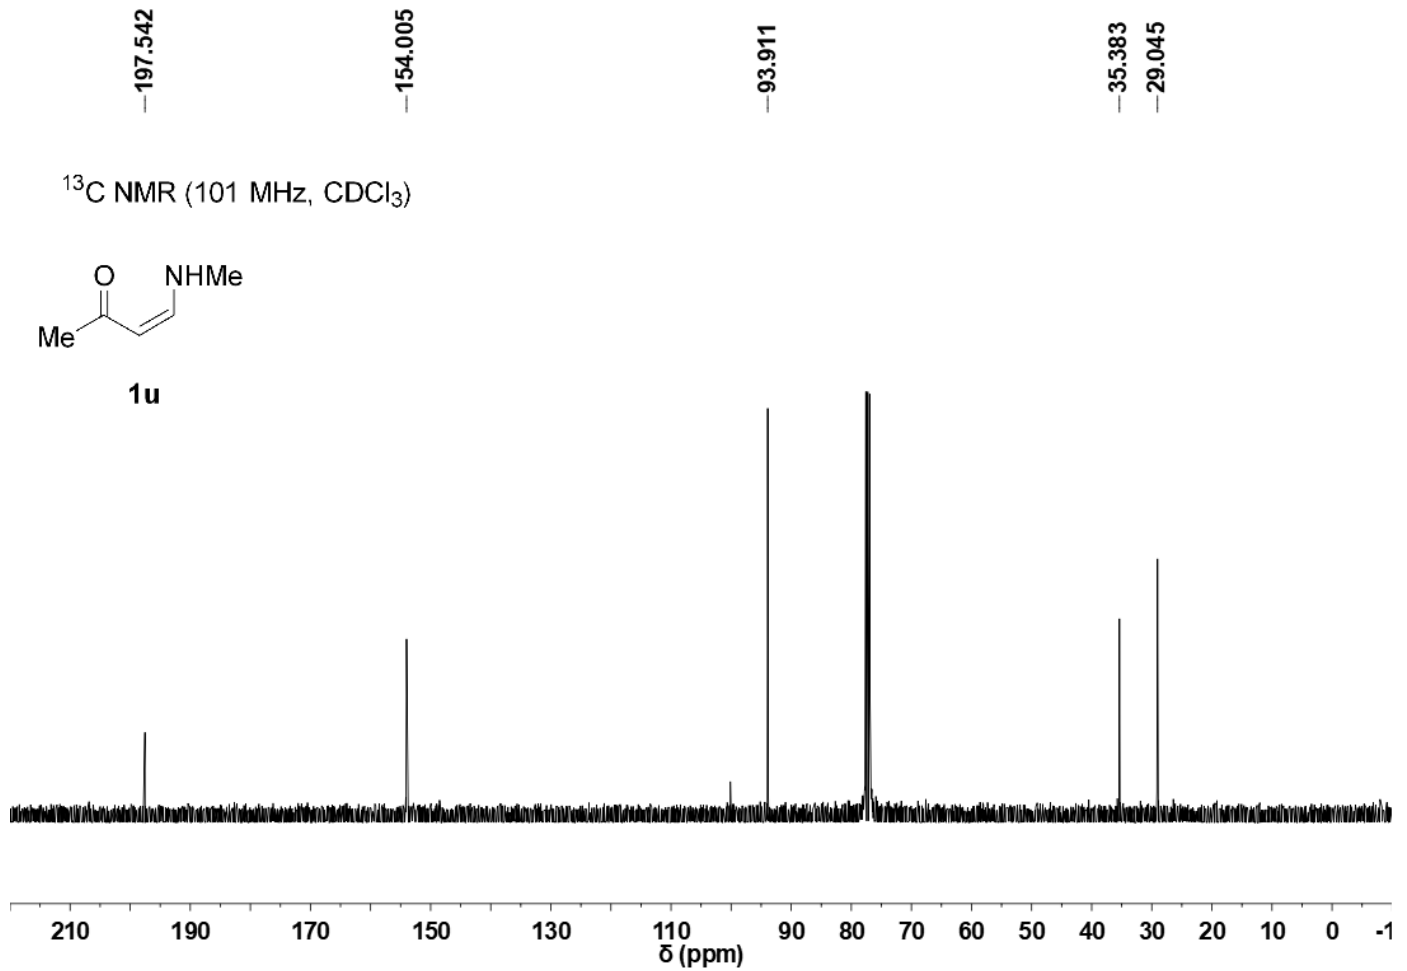

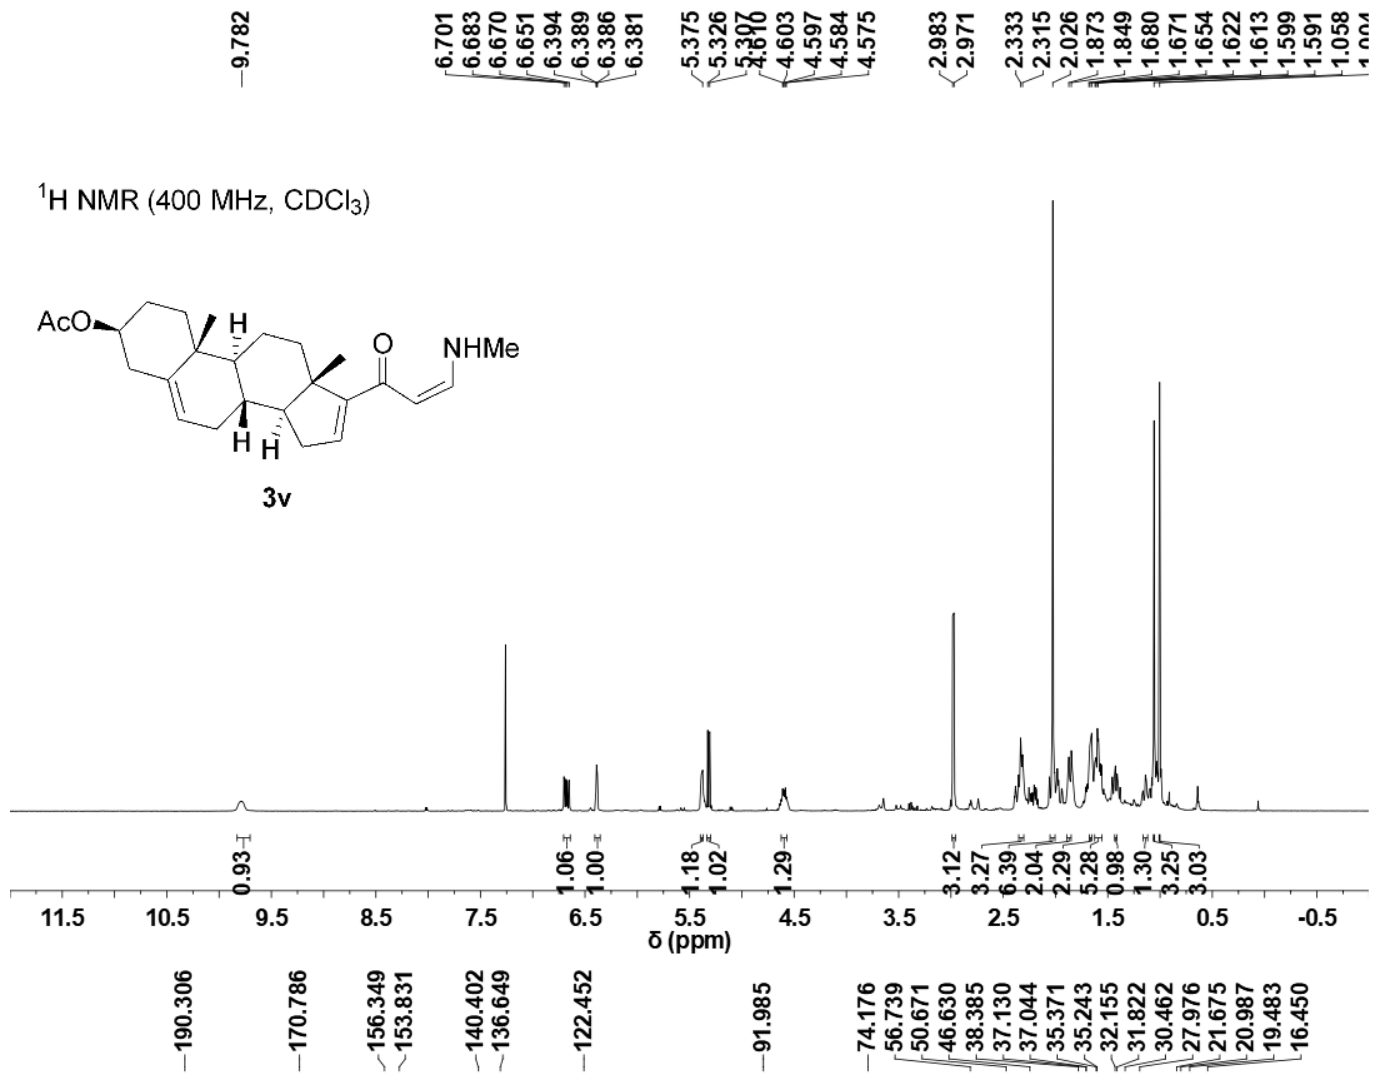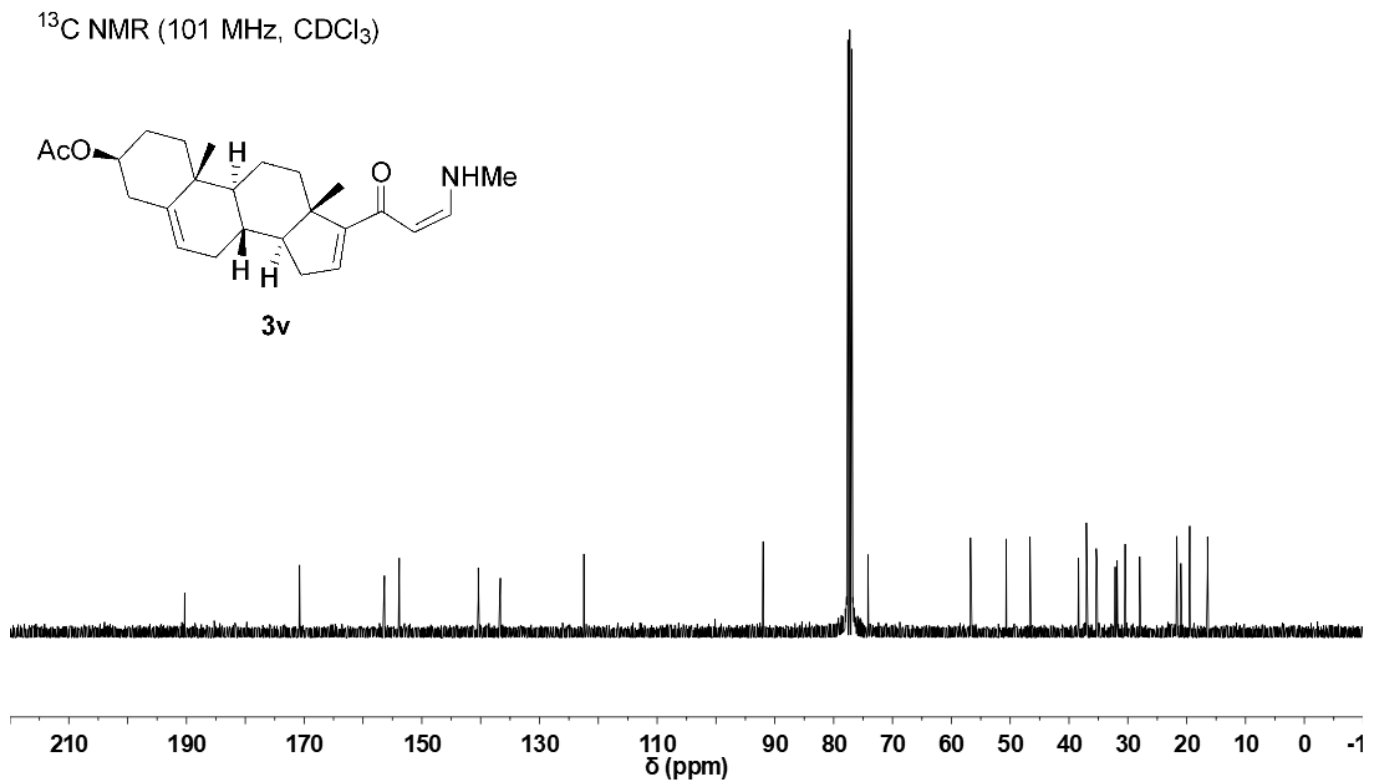

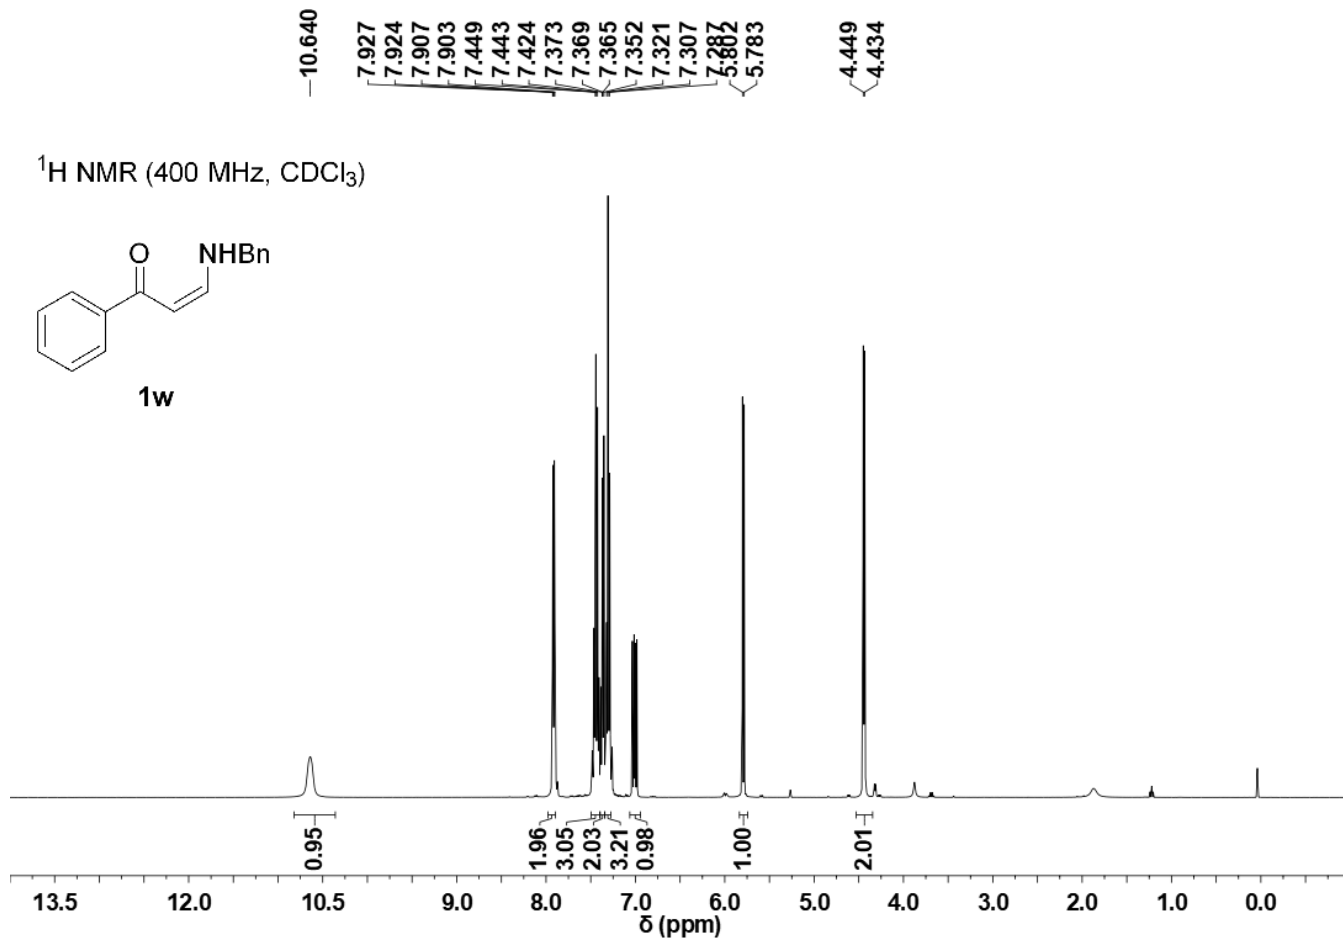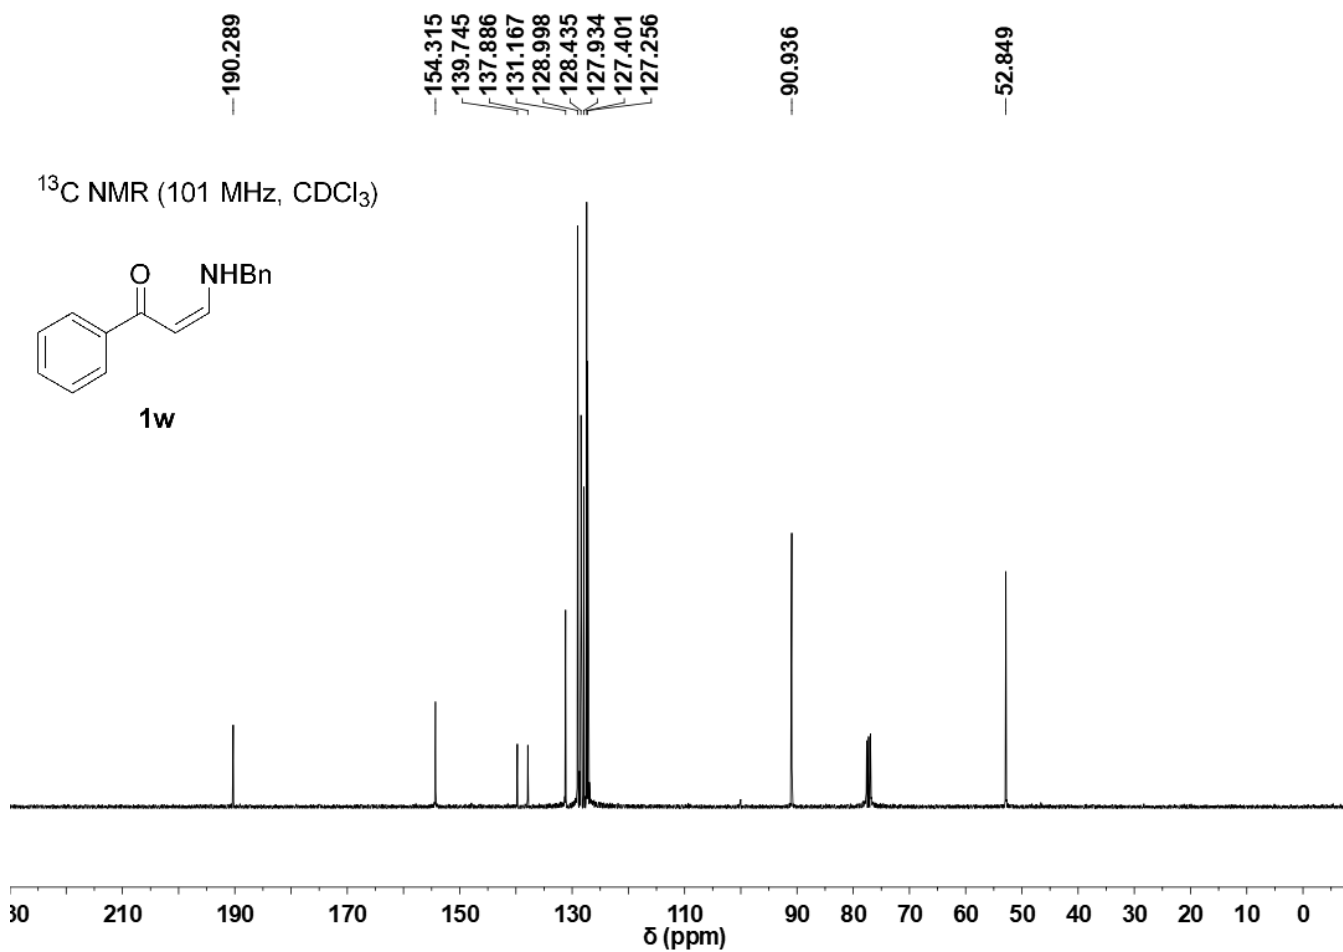



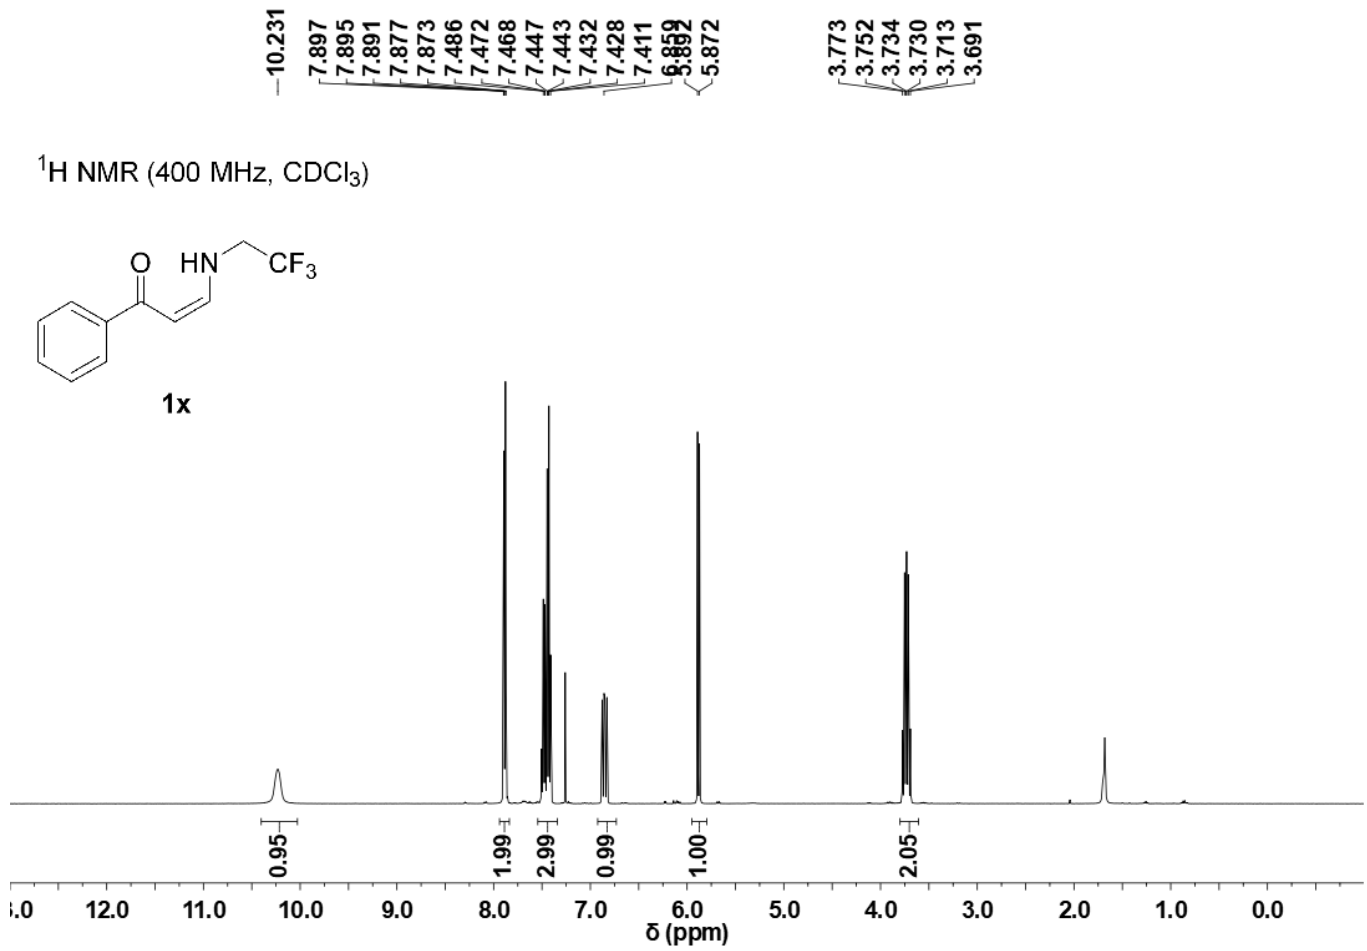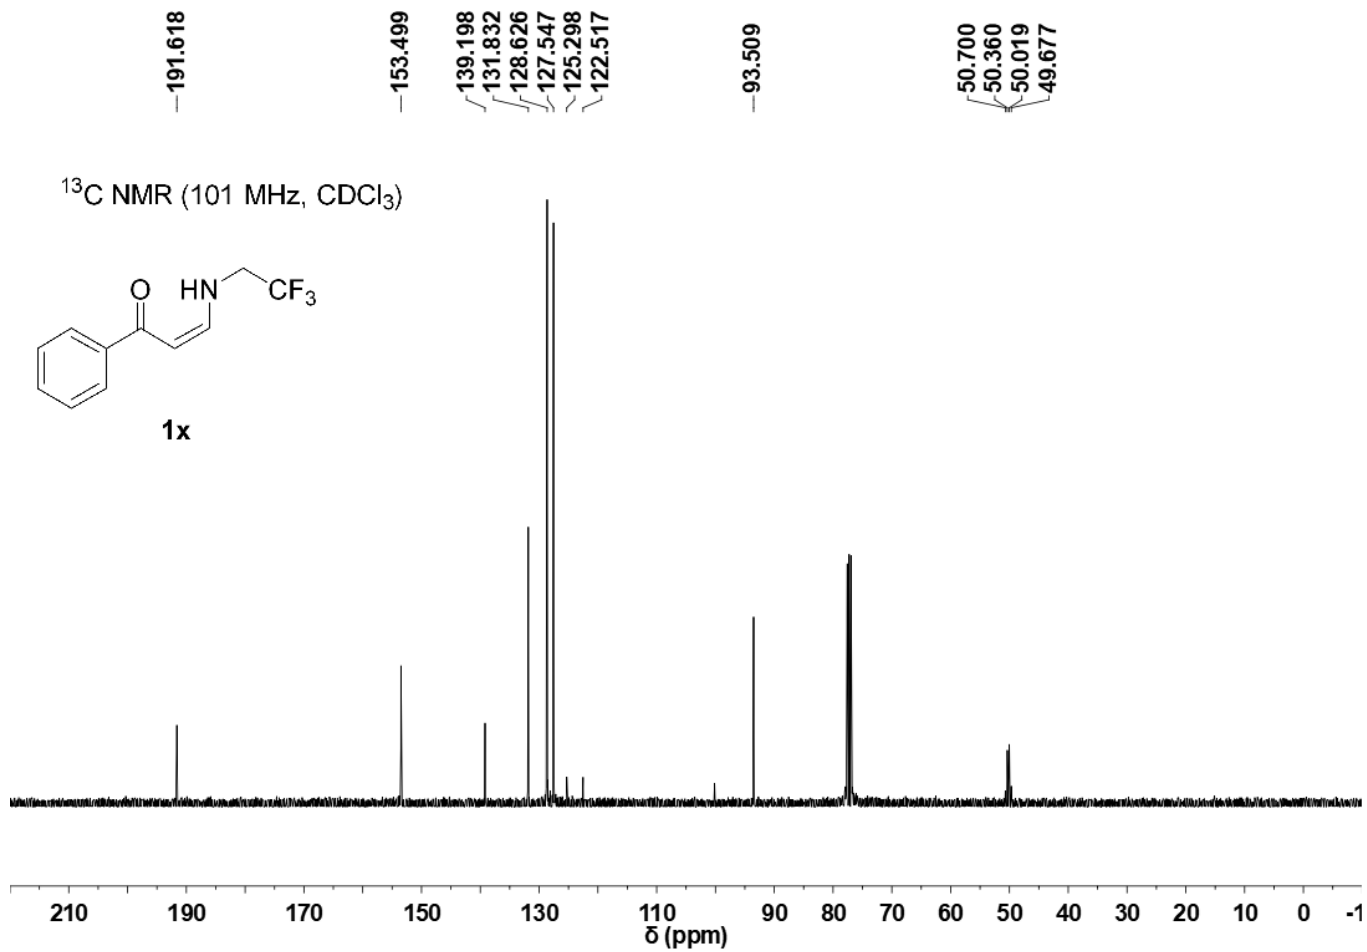

$^{19}\text{F}$  NMR (471 MHz,  $\text{CDCl}_3$ )

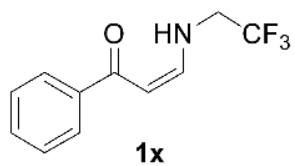

-73.510

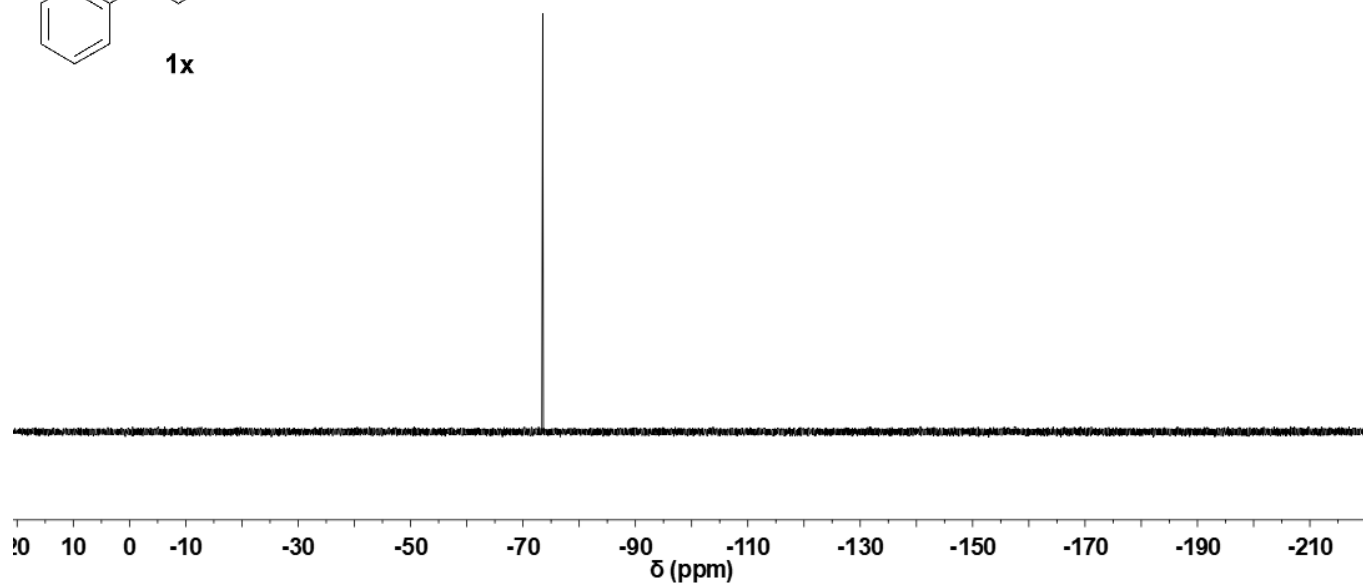

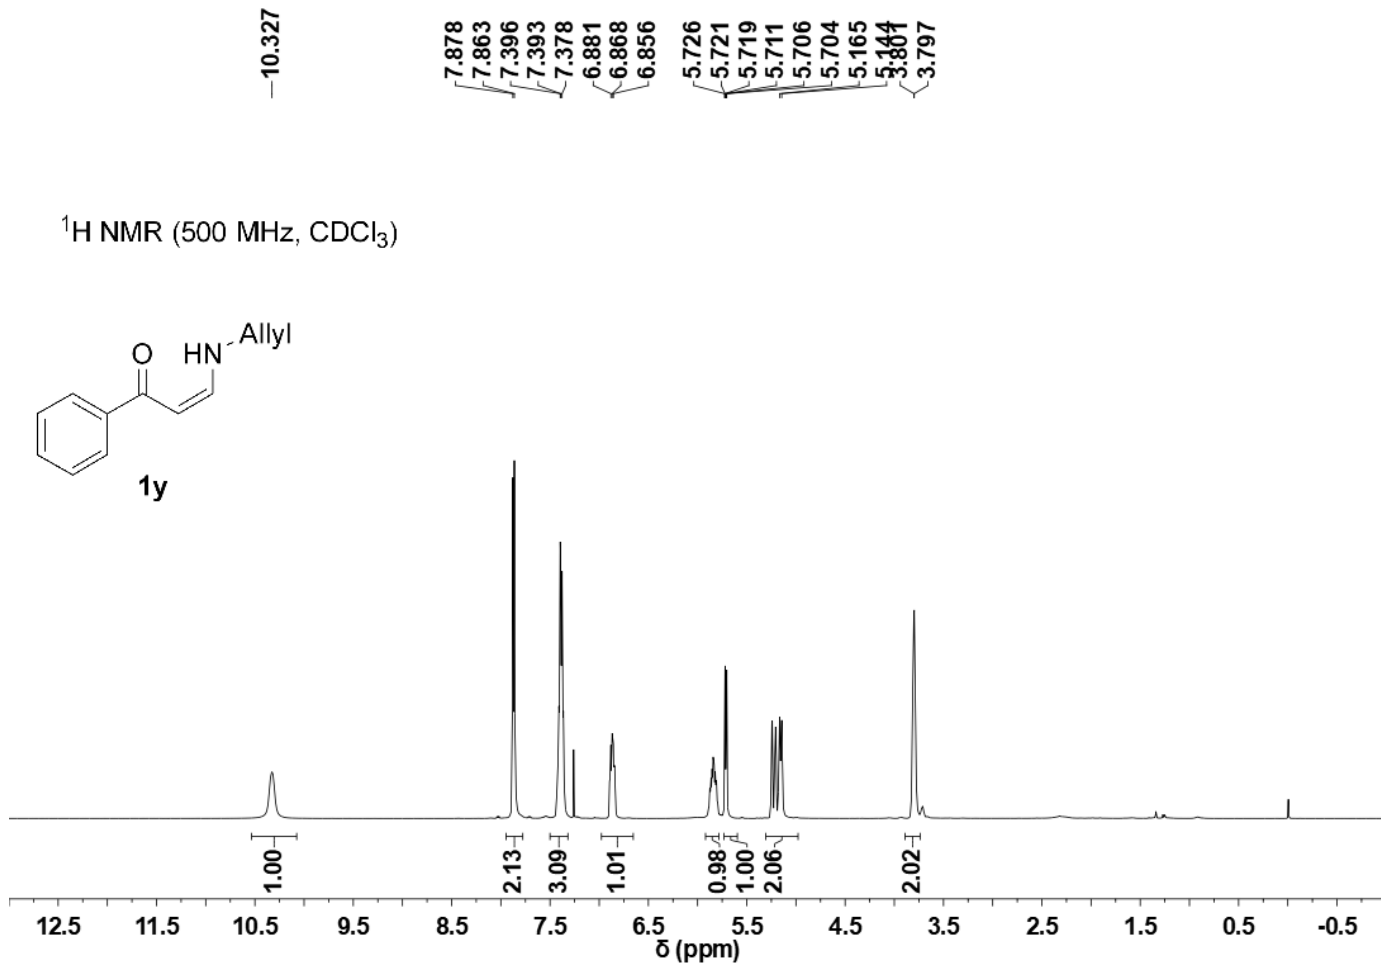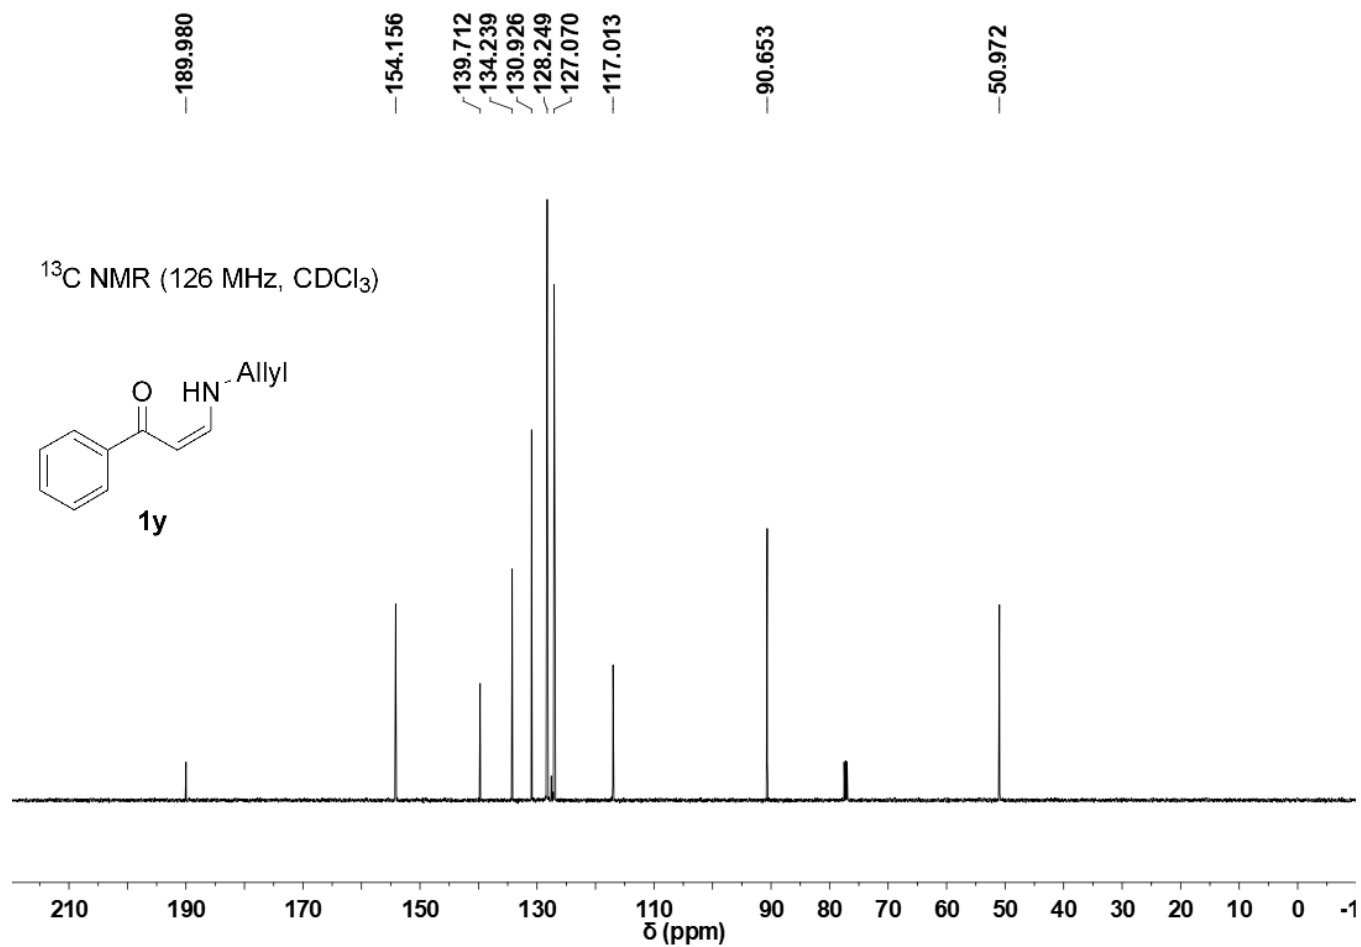

12.174  
12.146  
7.959  
7.957  
7.940  
7.936  
7.527  
7.509  
7.492  
7.477  
7.474  
7.463  
7.459  
7.373  
7.354  
7.352  
7.333  
7.124  
7.106  
6.888  
6.028

<sup>1</sup>H NMR (400 MHz, CDCl<sub>3</sub>)

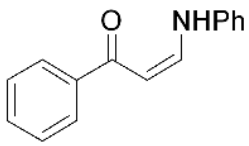

1z

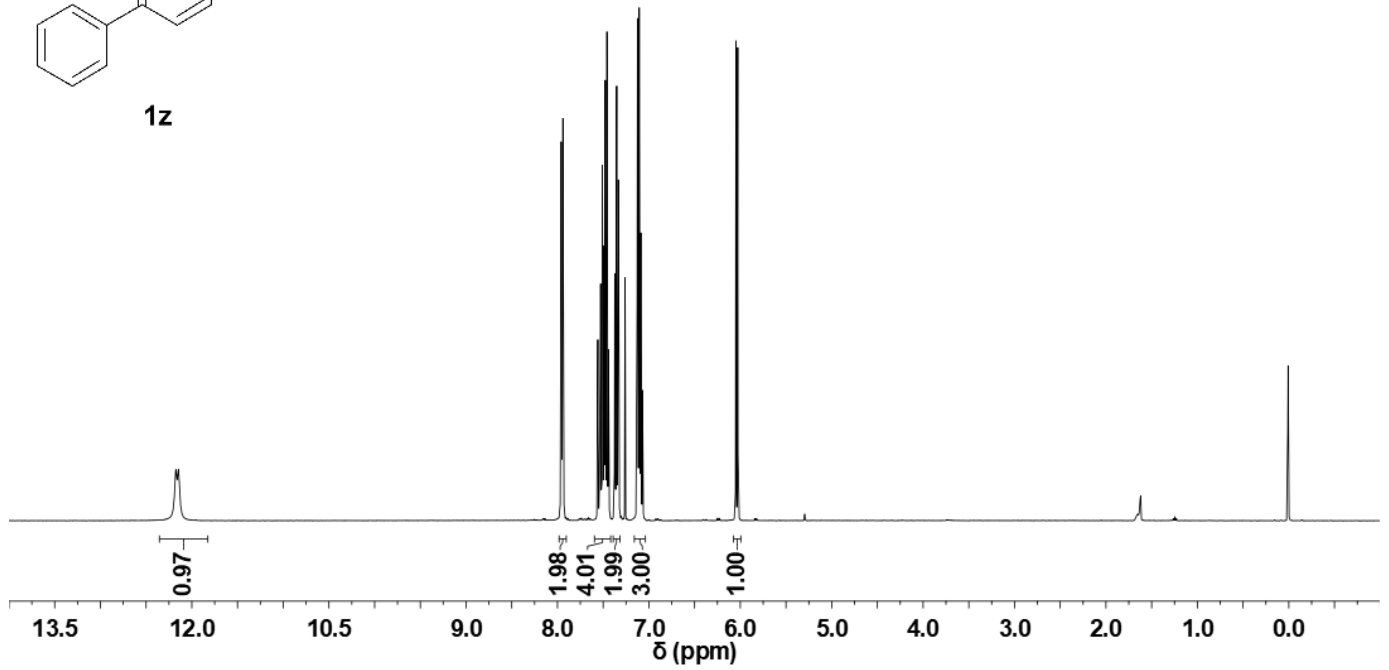

191.223  
145.157  
140.436  
139.399  
131.809  
129.978  
128.671  
127.532  
123.925  
116.556  
93.932

<sup>13</sup>C NMR (101 MHz, CDCl<sub>3</sub>)

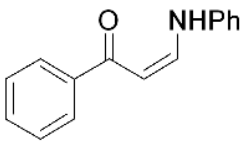

1z

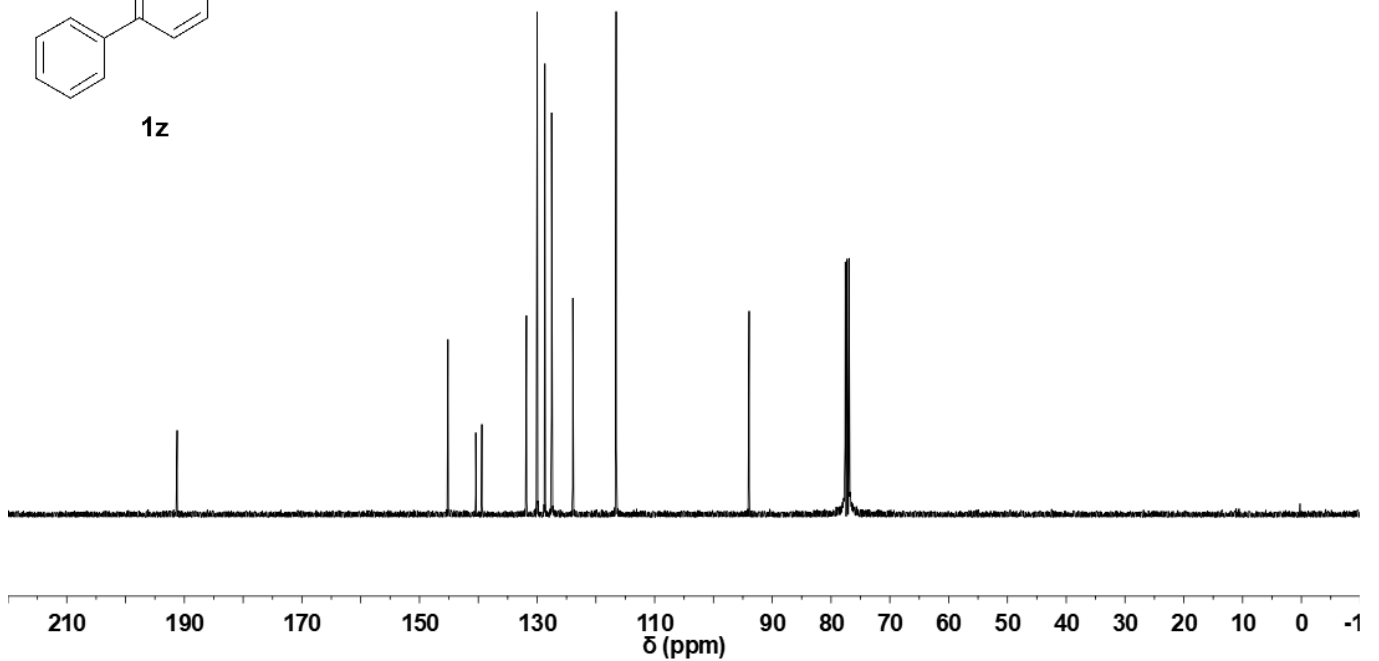

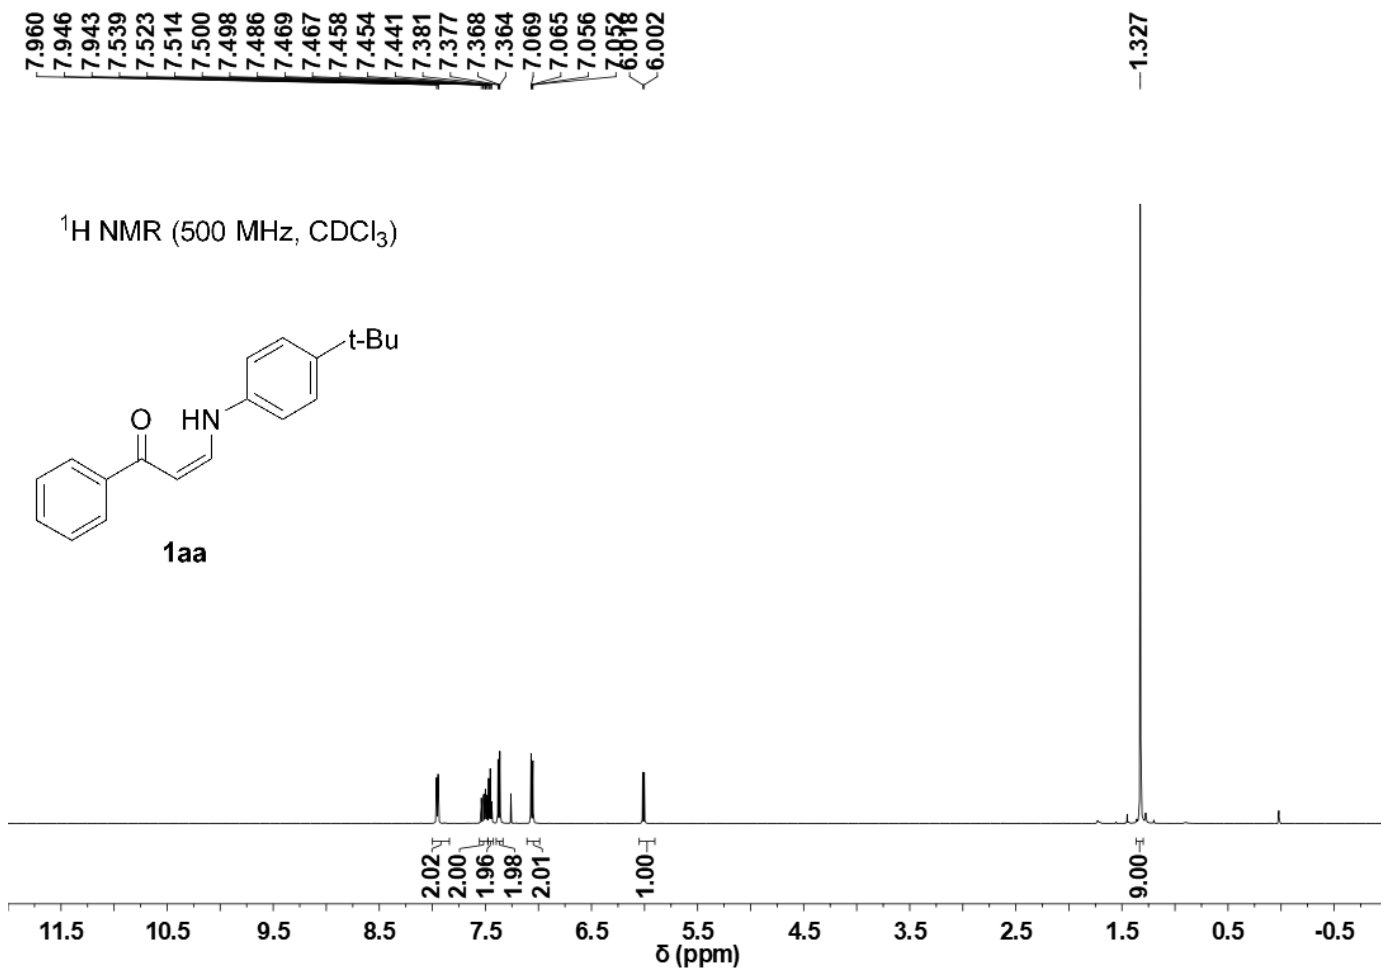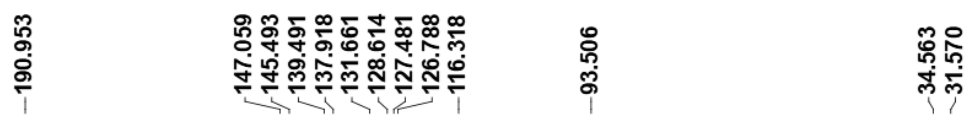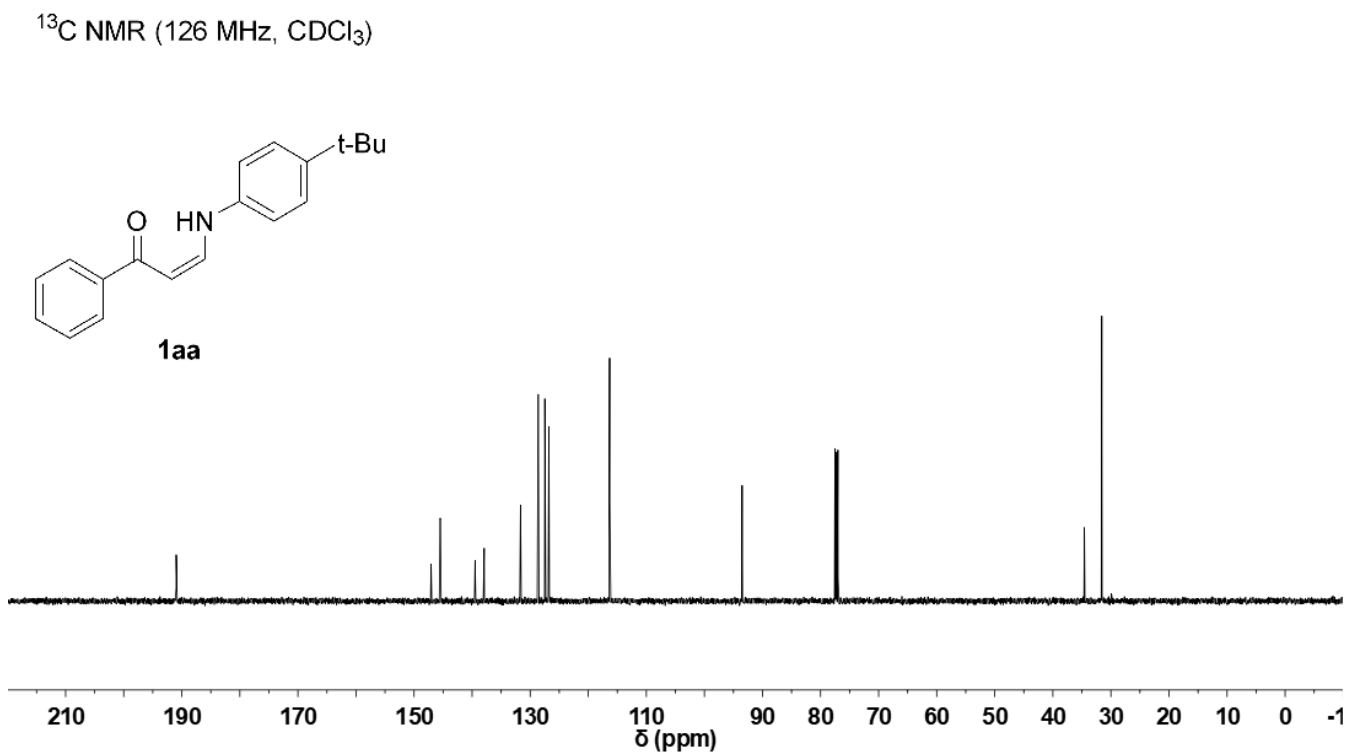

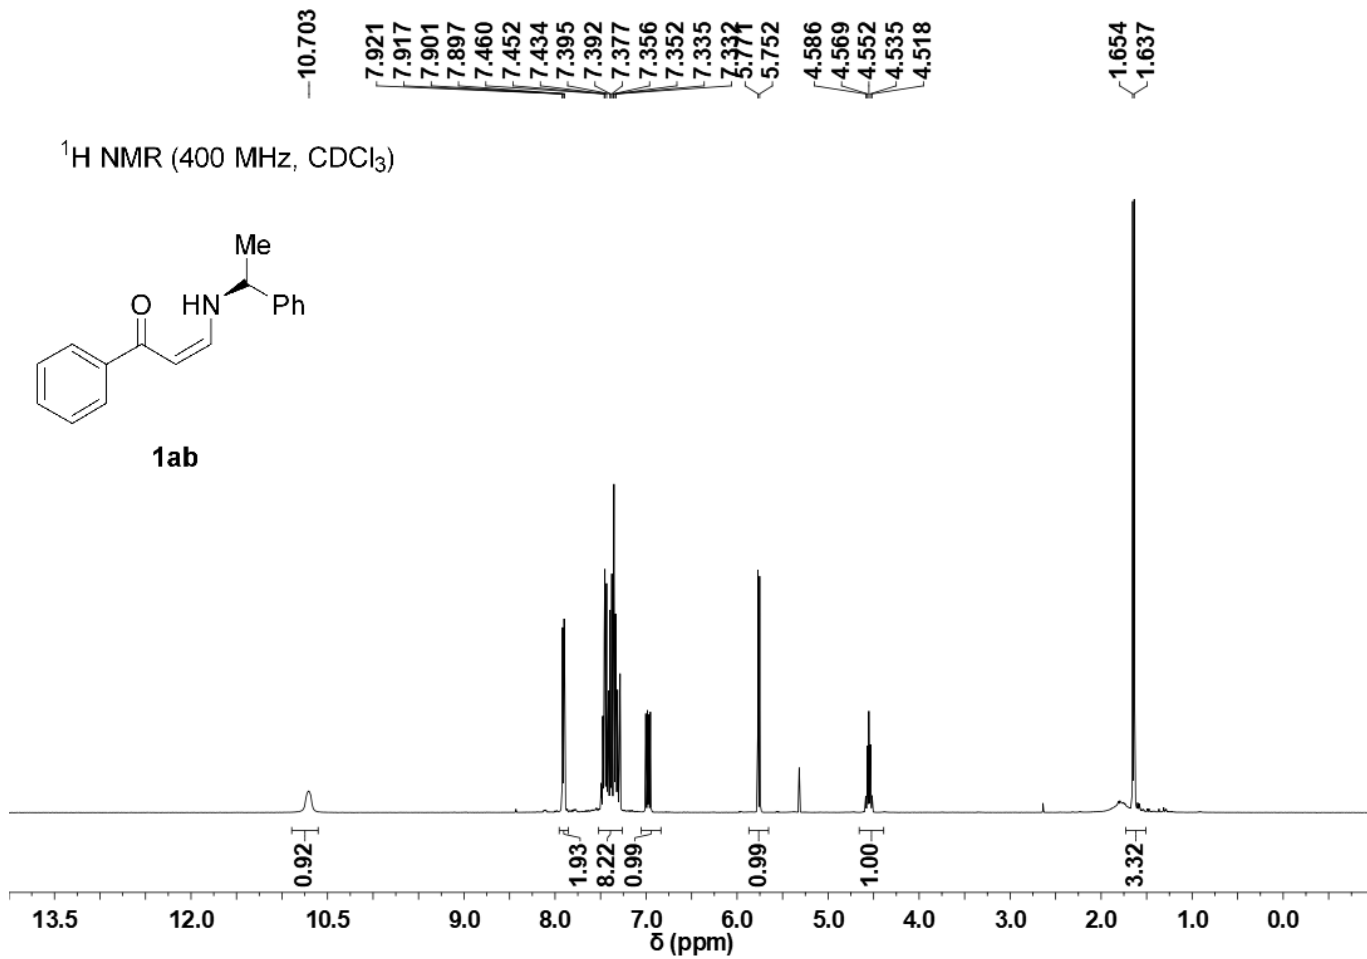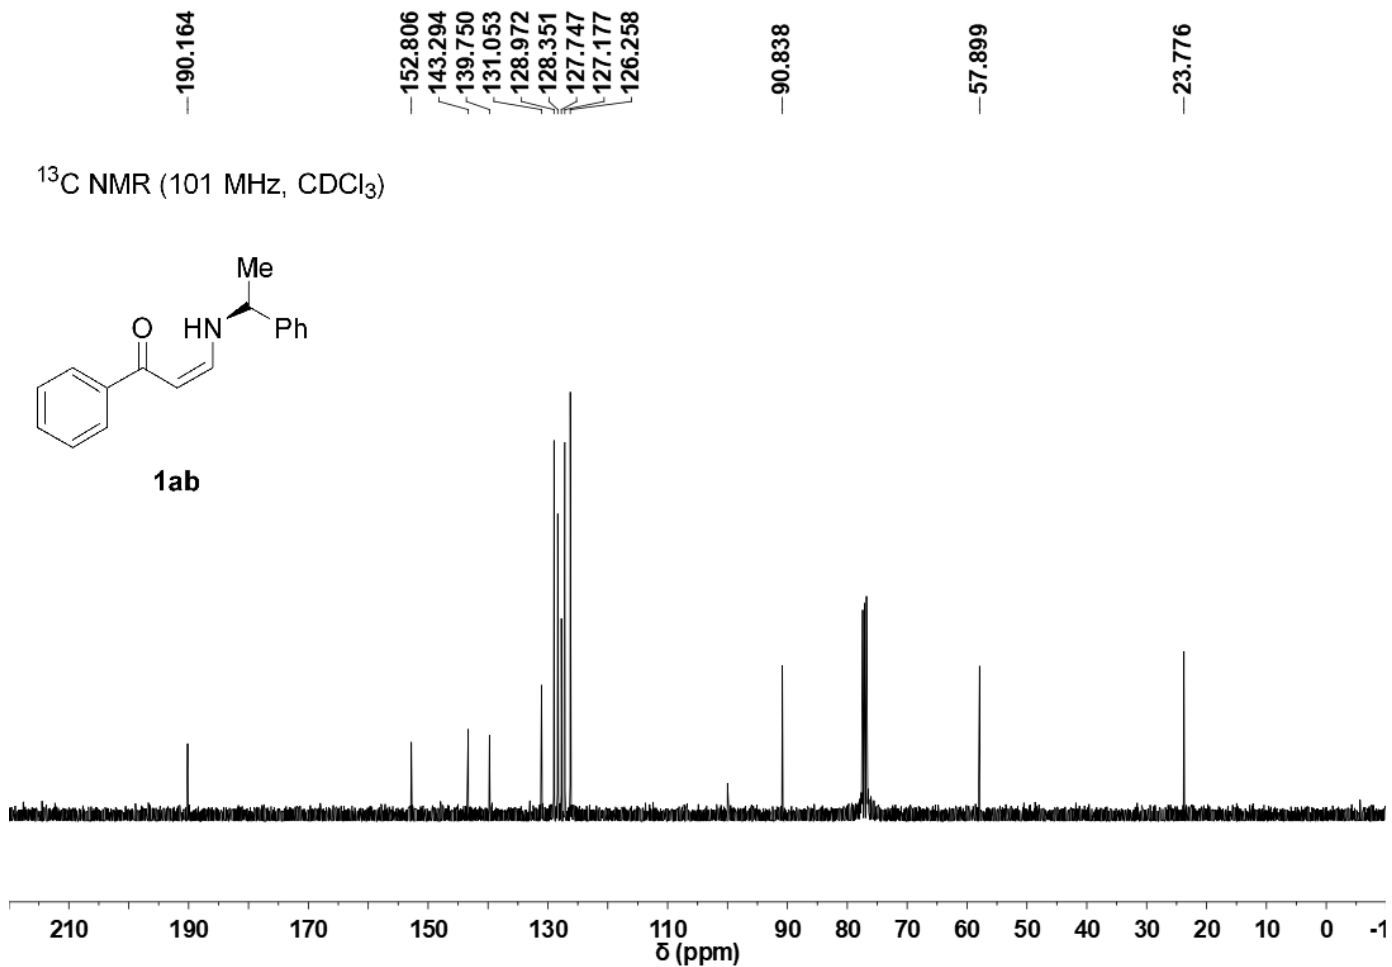

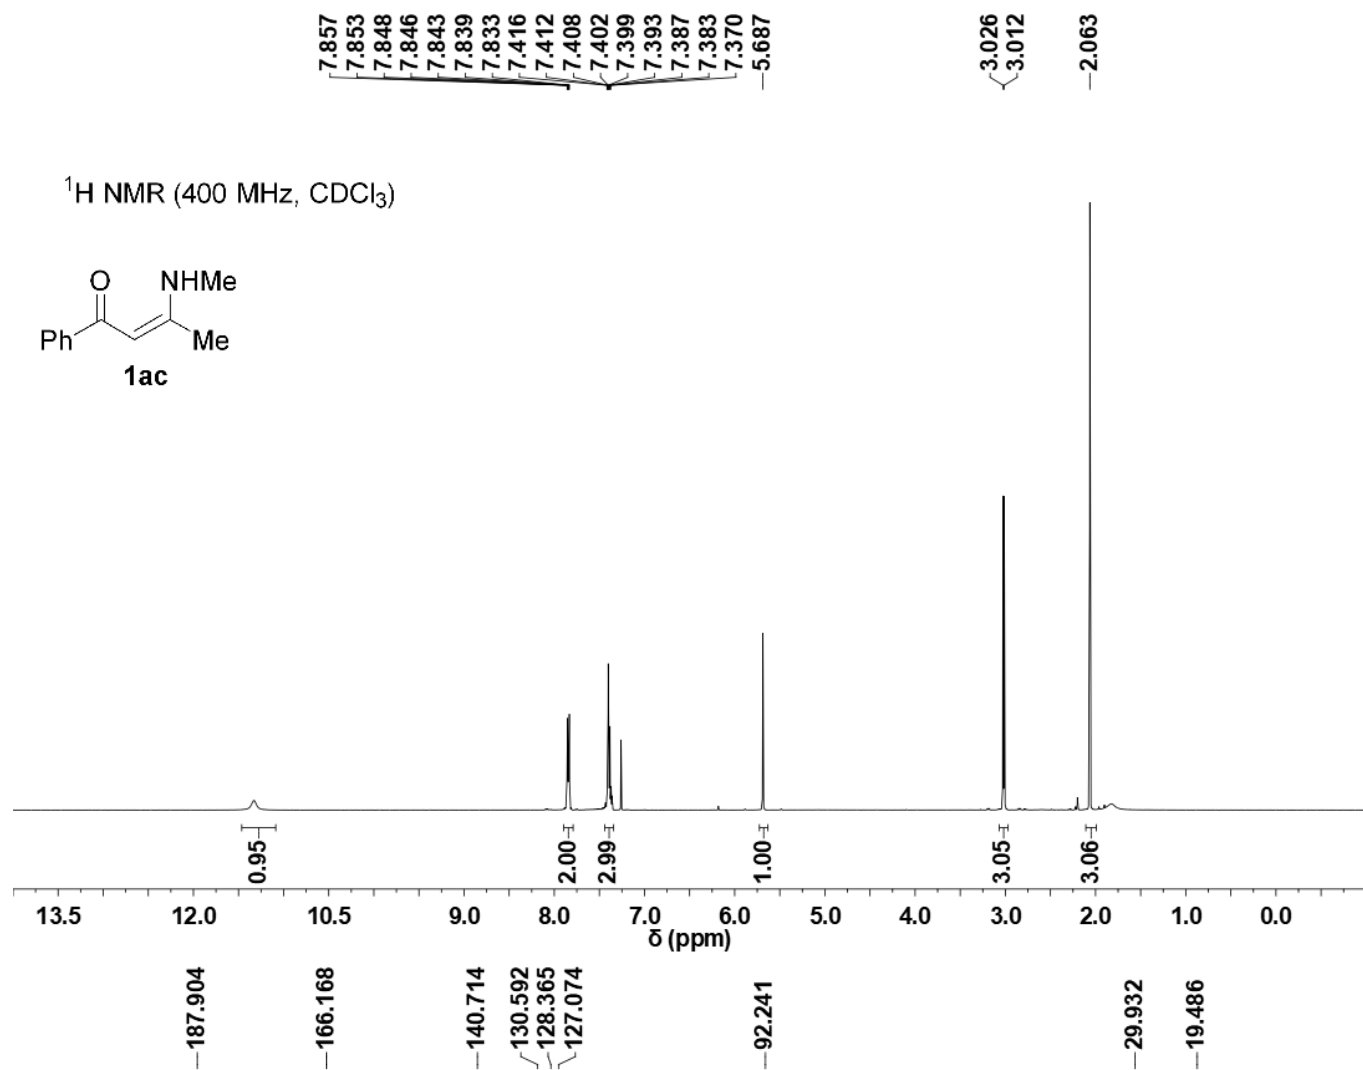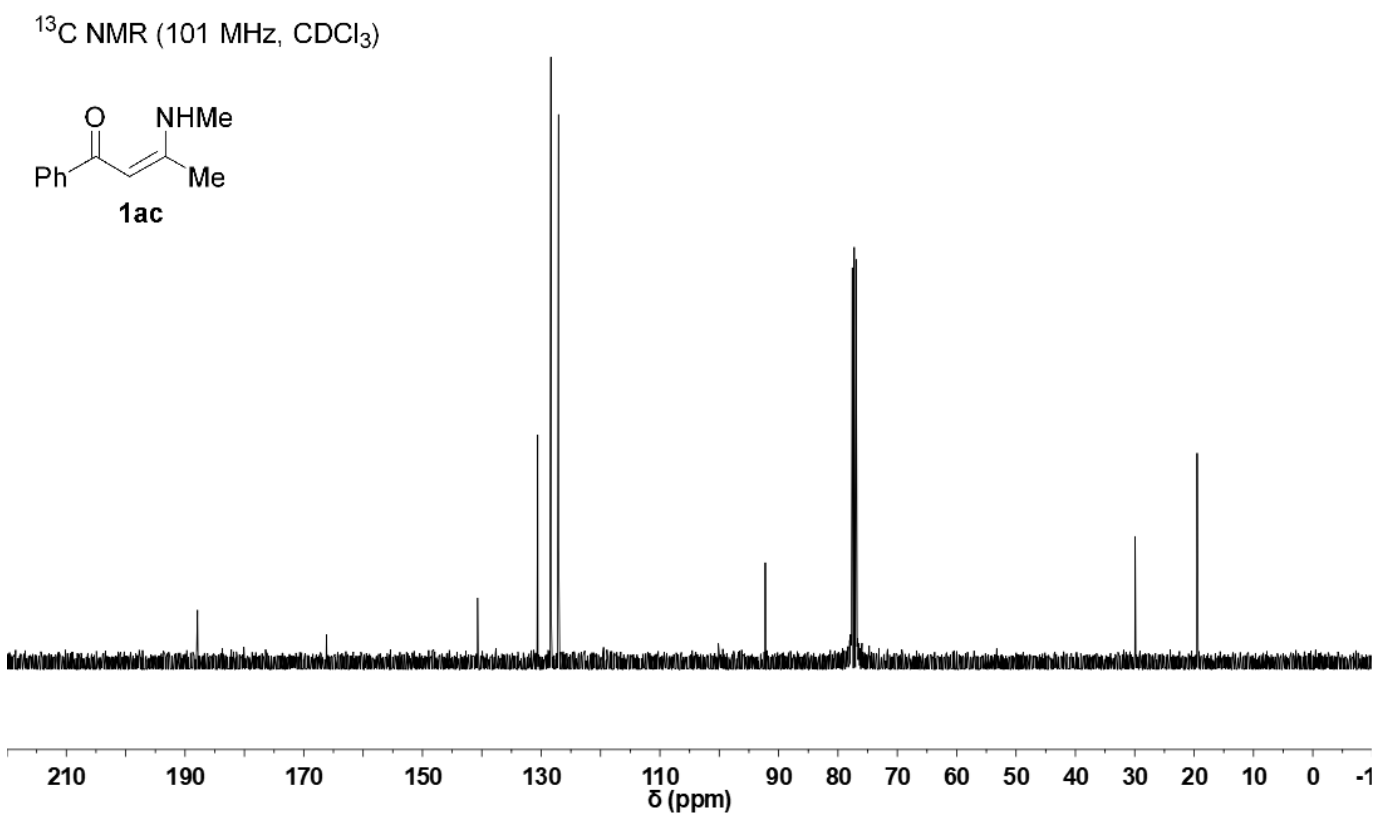

<sup>1</sup>H NMR (400 MHz, CDCl<sub>3</sub>)

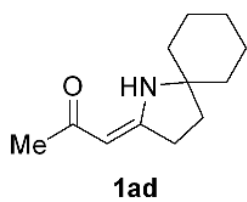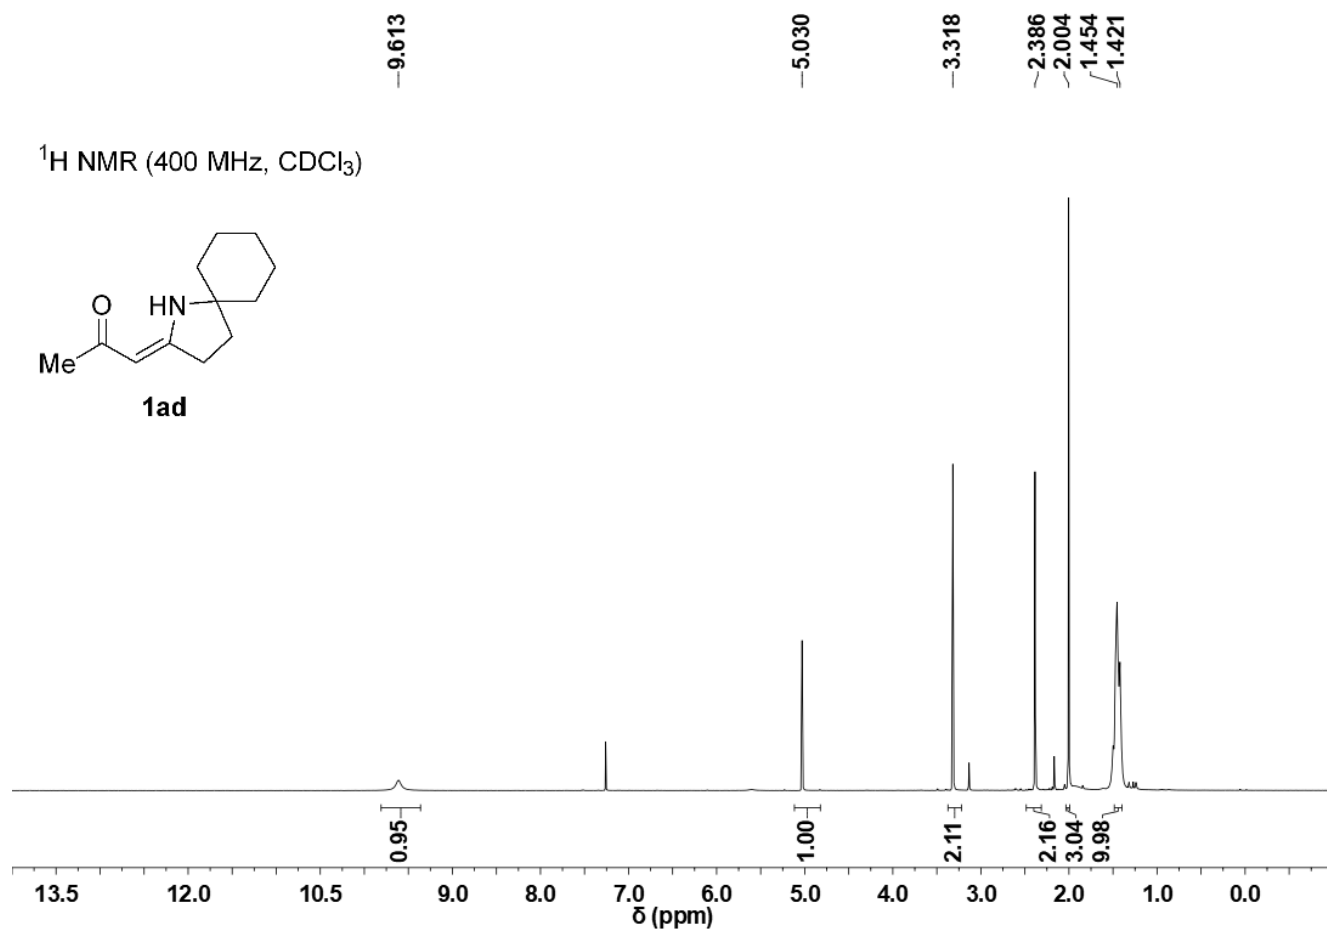

<sup>13</sup>C NMR (101 MHz, CDCl<sub>3</sub>)

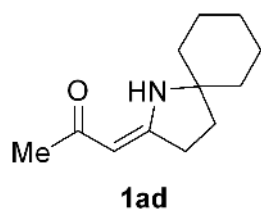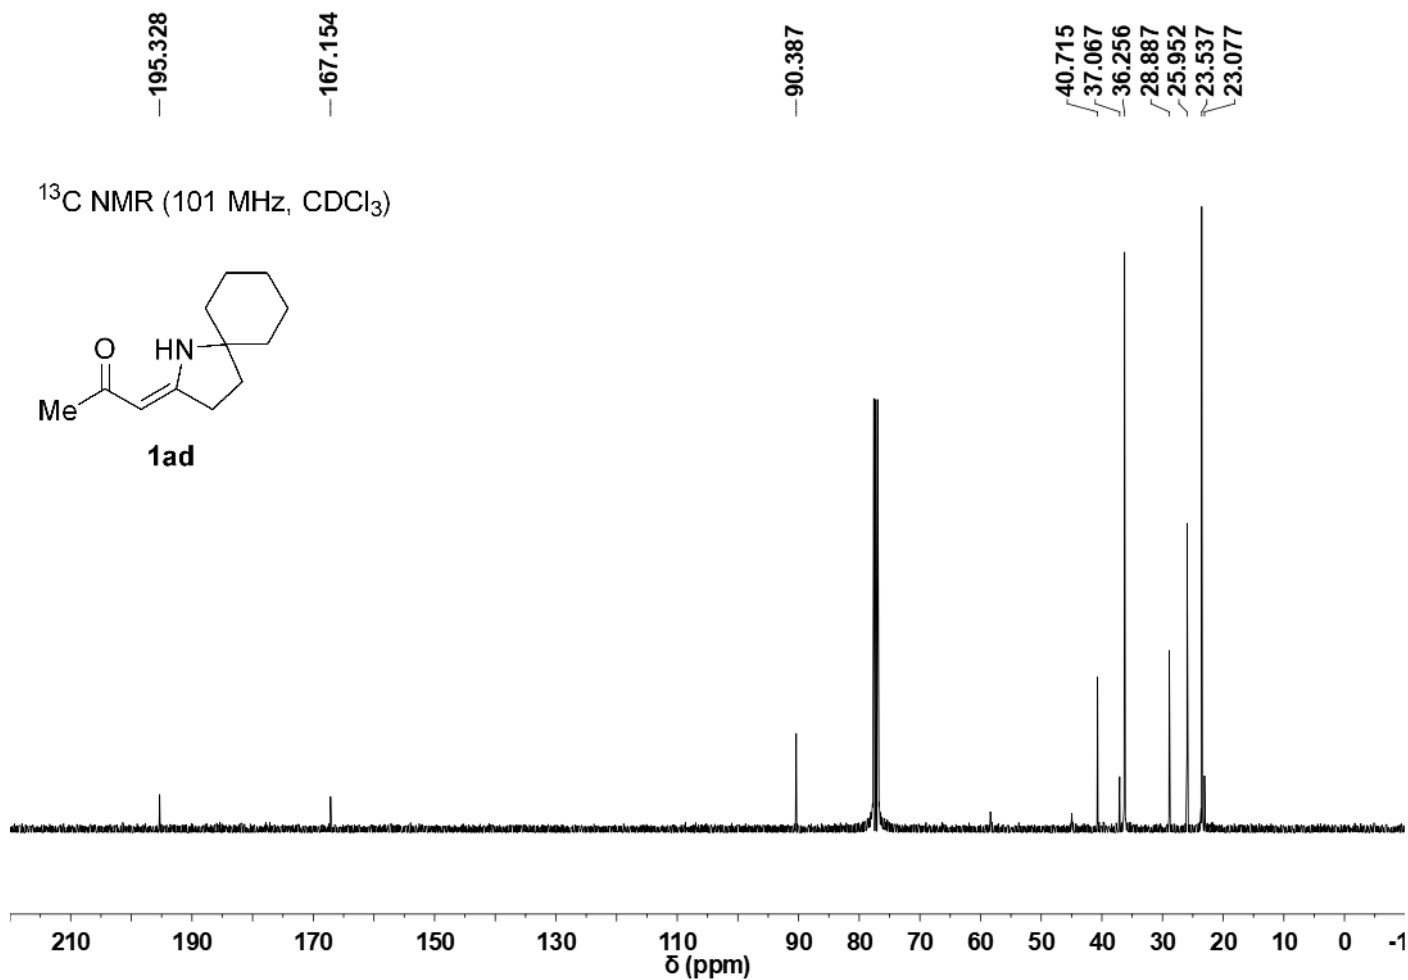



7.987  
7.981  
7.881  
7.857  
7.684  
7.681  
7.665  
7.664  
7.590  
7.586  
7.571  
7.569  
7.566  
7.509  
7.504  
7.491  
7.476  
7.474  
6.574  
6.574  
3.586

$^1\text{H NMR}$  (400 MHz,  $\text{CDCl}_3$ )

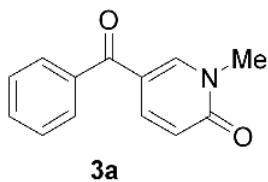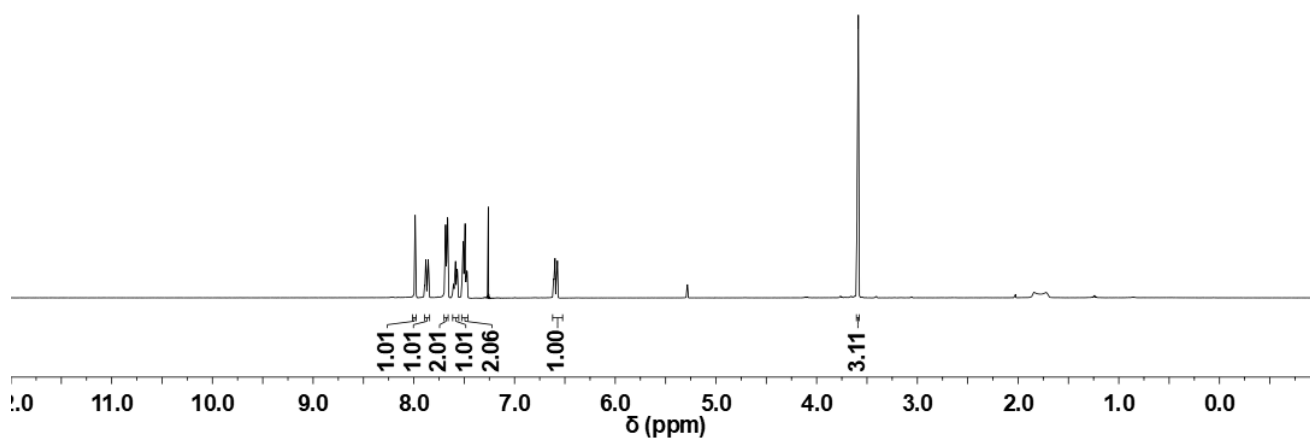

191.970  
162.898  
145.286  
139.479  
137.420  
132.527  
129.219  
128.808  
119.736  
117.448  
38.623

$^{13}\text{C NMR}$  (101 MHz,  $\text{CDCl}_3$ )

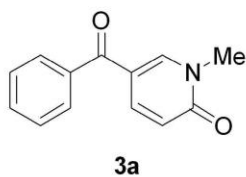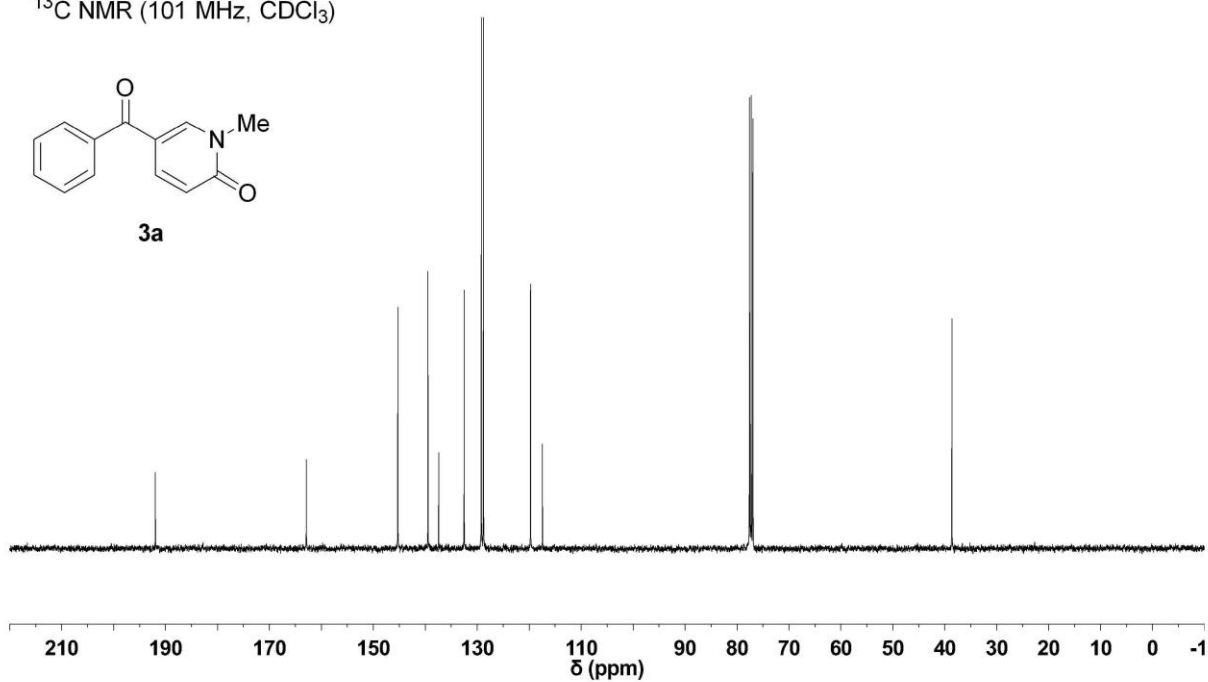

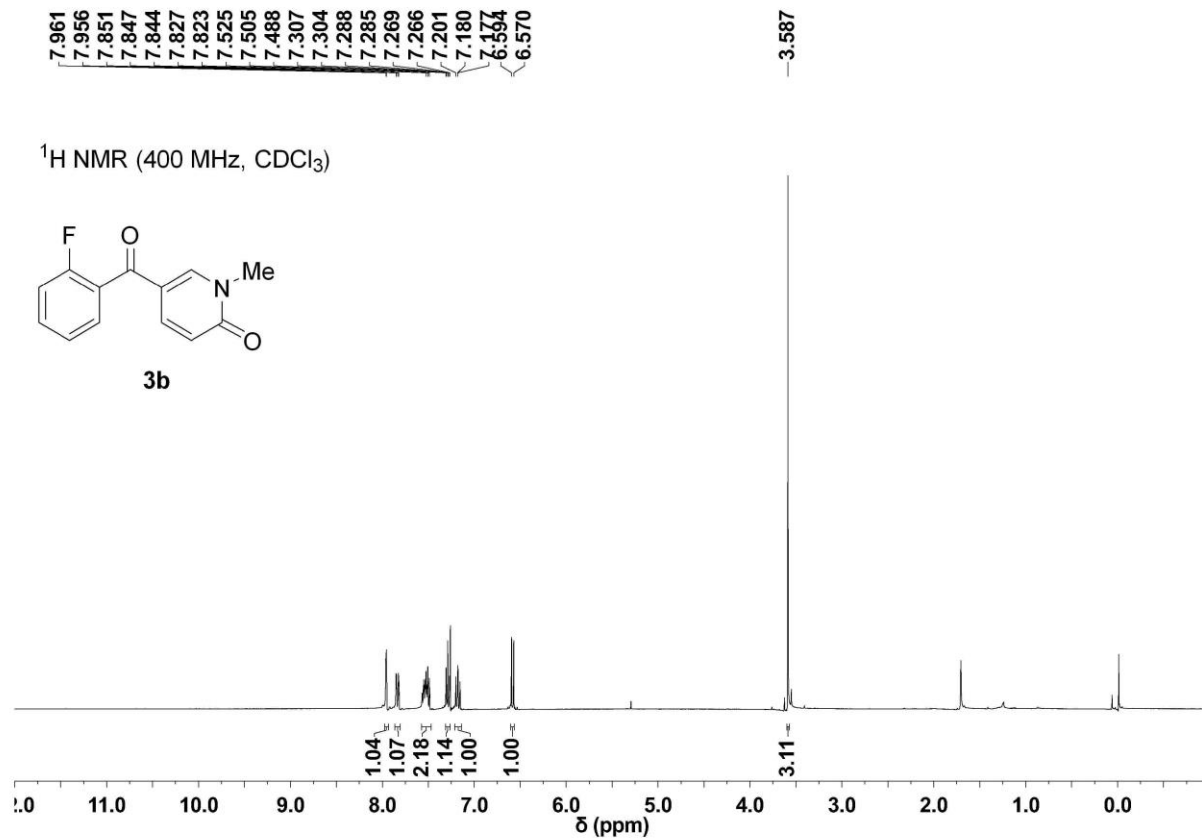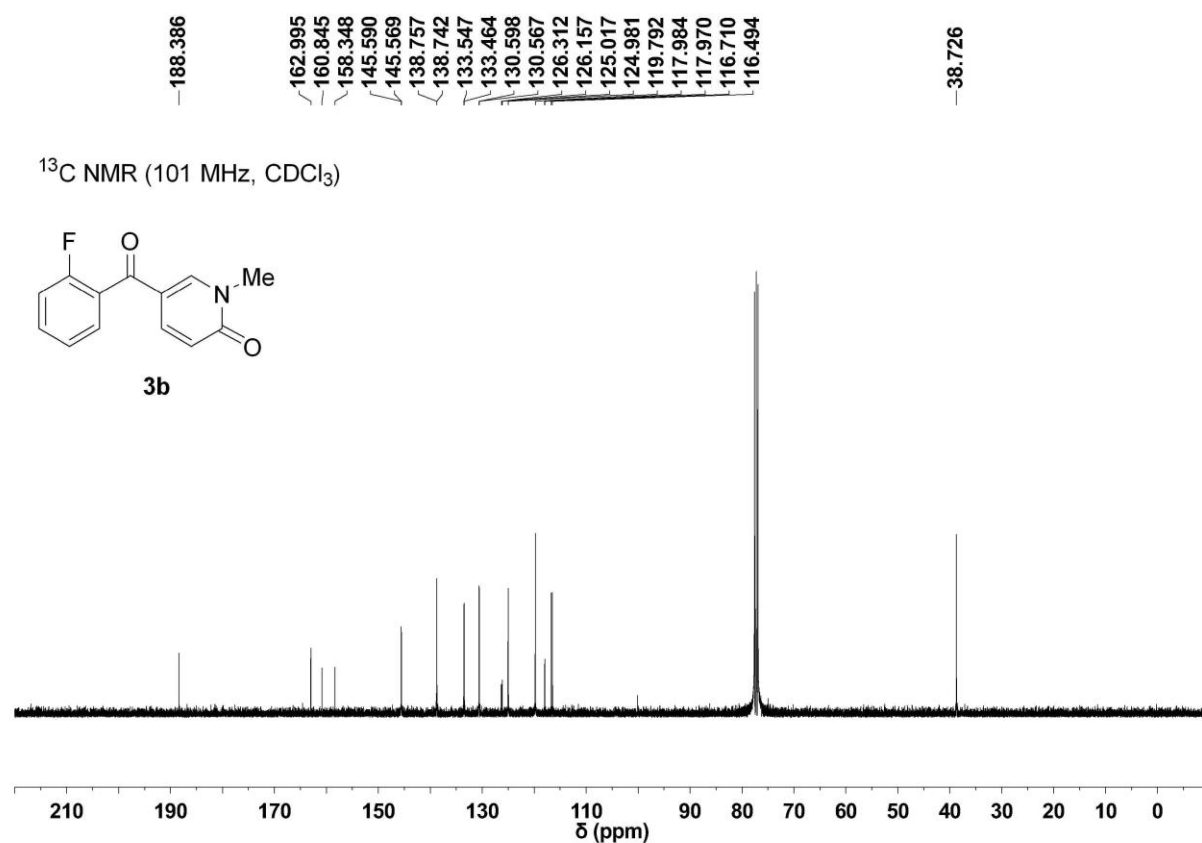

-112.018

$^{19}\text{F}$  NMR (471 MHz,  $\text{CDCl}_3$ )

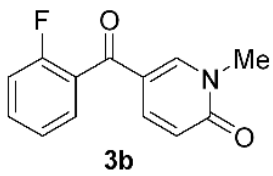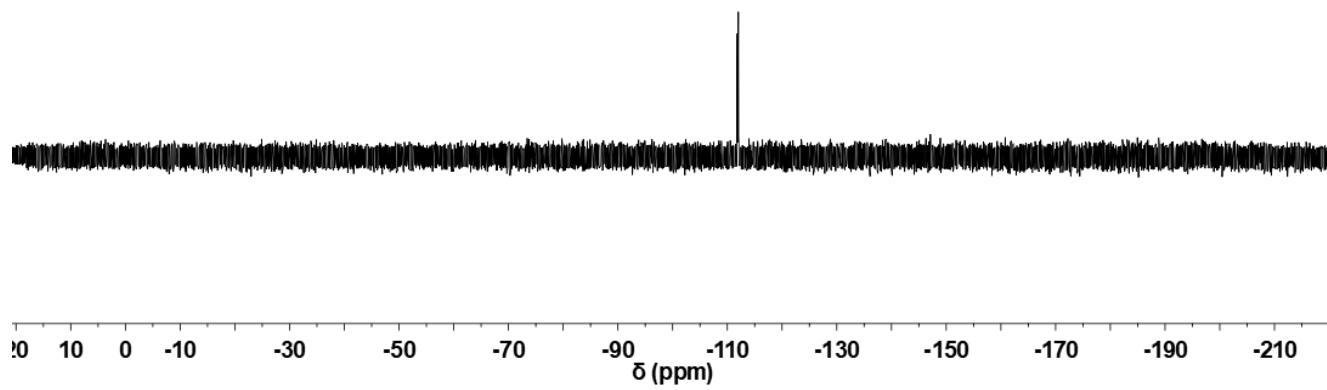

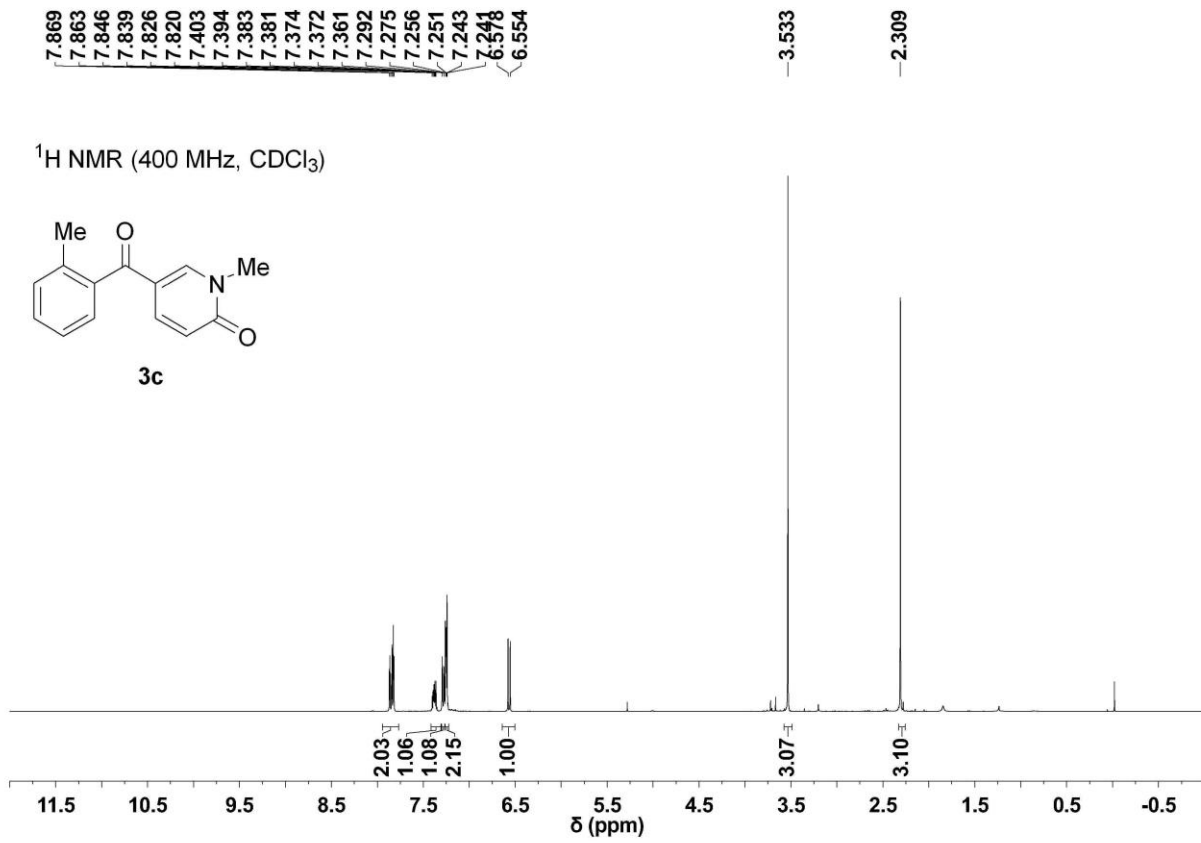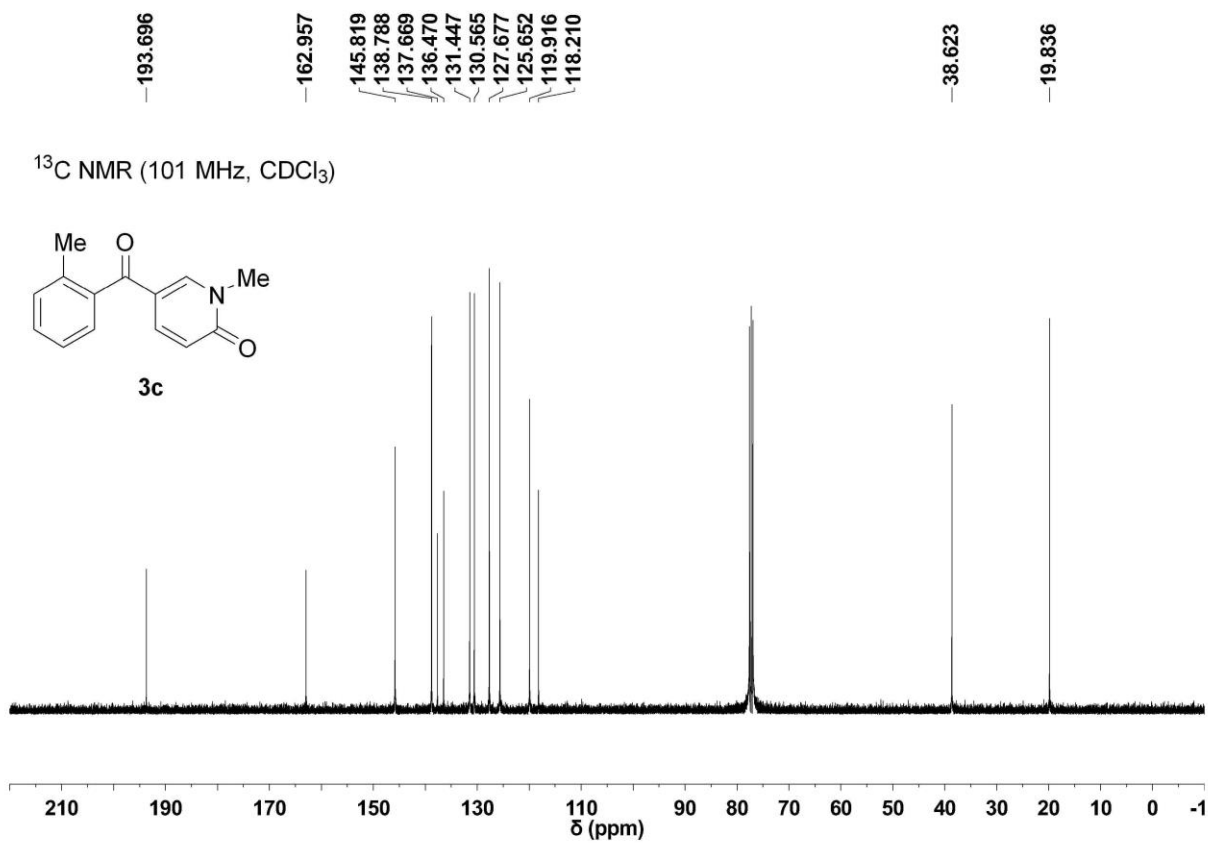

7.915  
7.908  
7.773  
7.767  
7.750  
7.743  
7.486  
7.481  
7.467  
7.465  
7.463  
7.461  
7.446  
7.442  
7.323  
7.319  
7.304  
7.300  
7.059  
7.057  
7.040  
7.038  
7.022  
7.019  
6.993  
6.972  
6.533  
6.509  
3.769  
3.549

<sup>1</sup>H NMR (400 MHz, CDCl<sub>3</sub>)

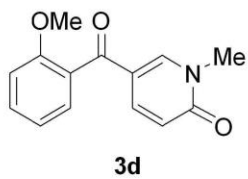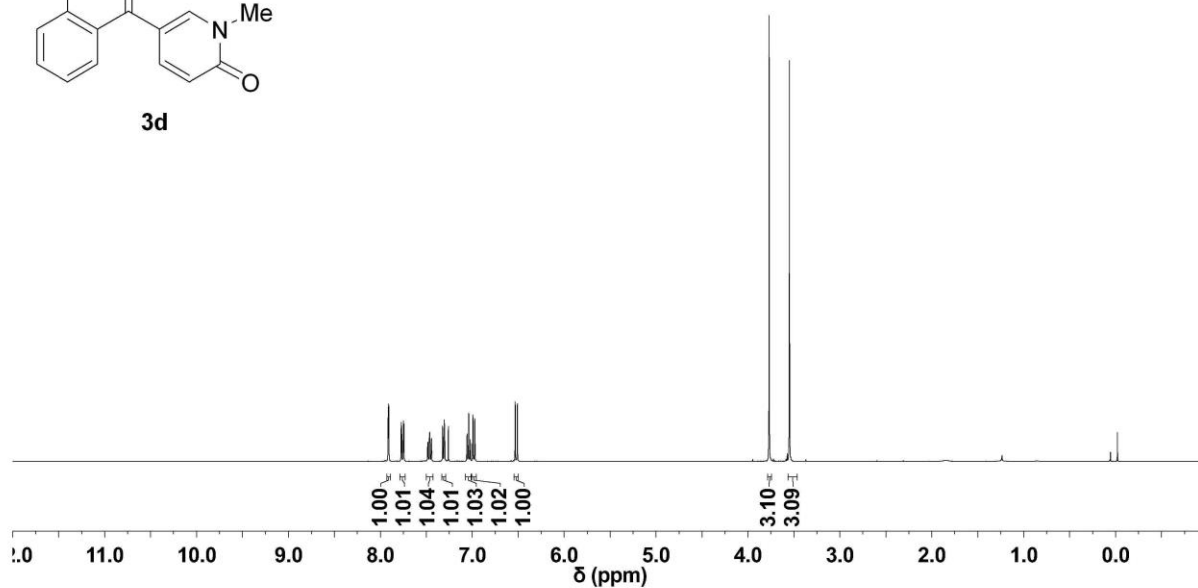

191.604  
163.118  
156.922  
145.185  
139.214  
132.432  
129.497  
127.765  
121.047  
119.288  
118.438  
111.620  
55.823  
38.563

<sup>13</sup>C NMR (101 MHz, CDCl<sub>3</sub>)

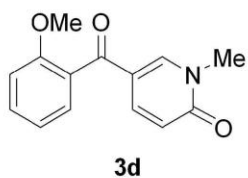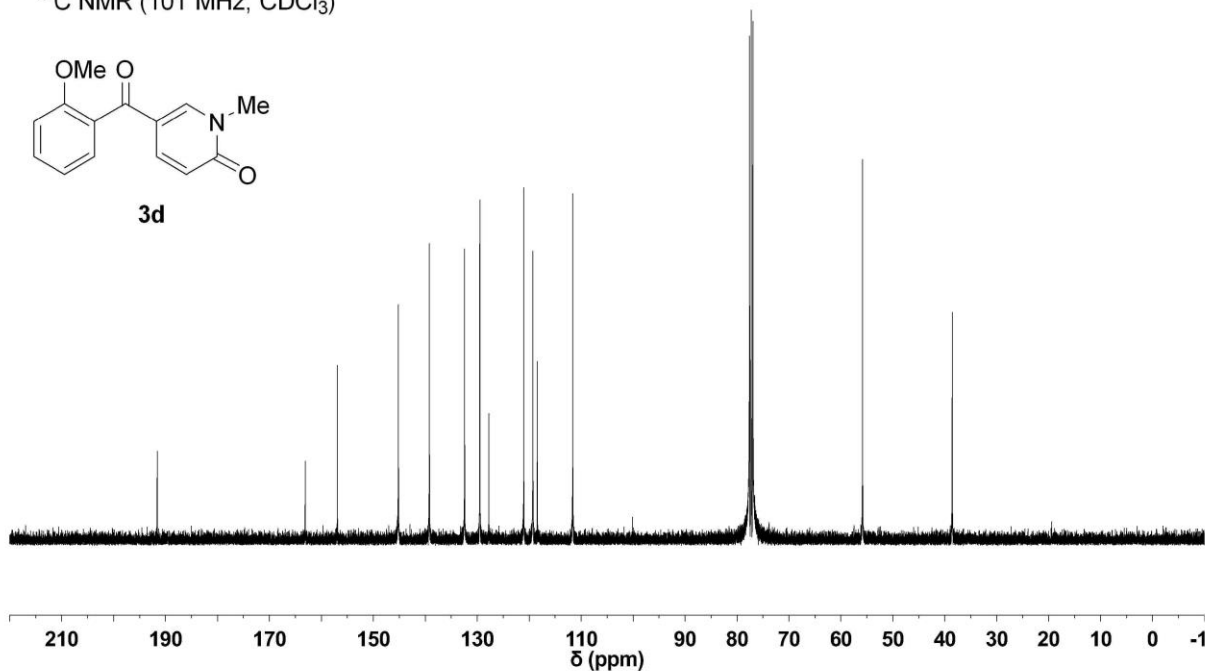

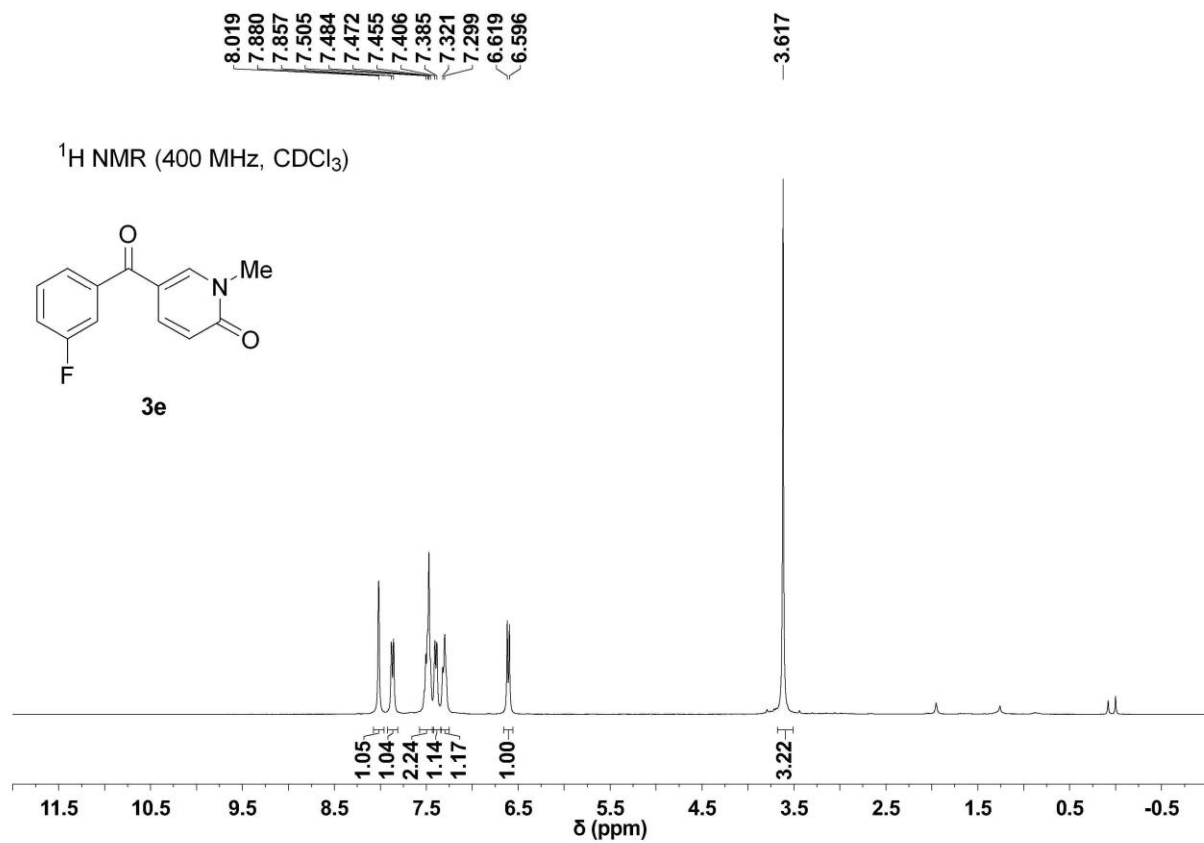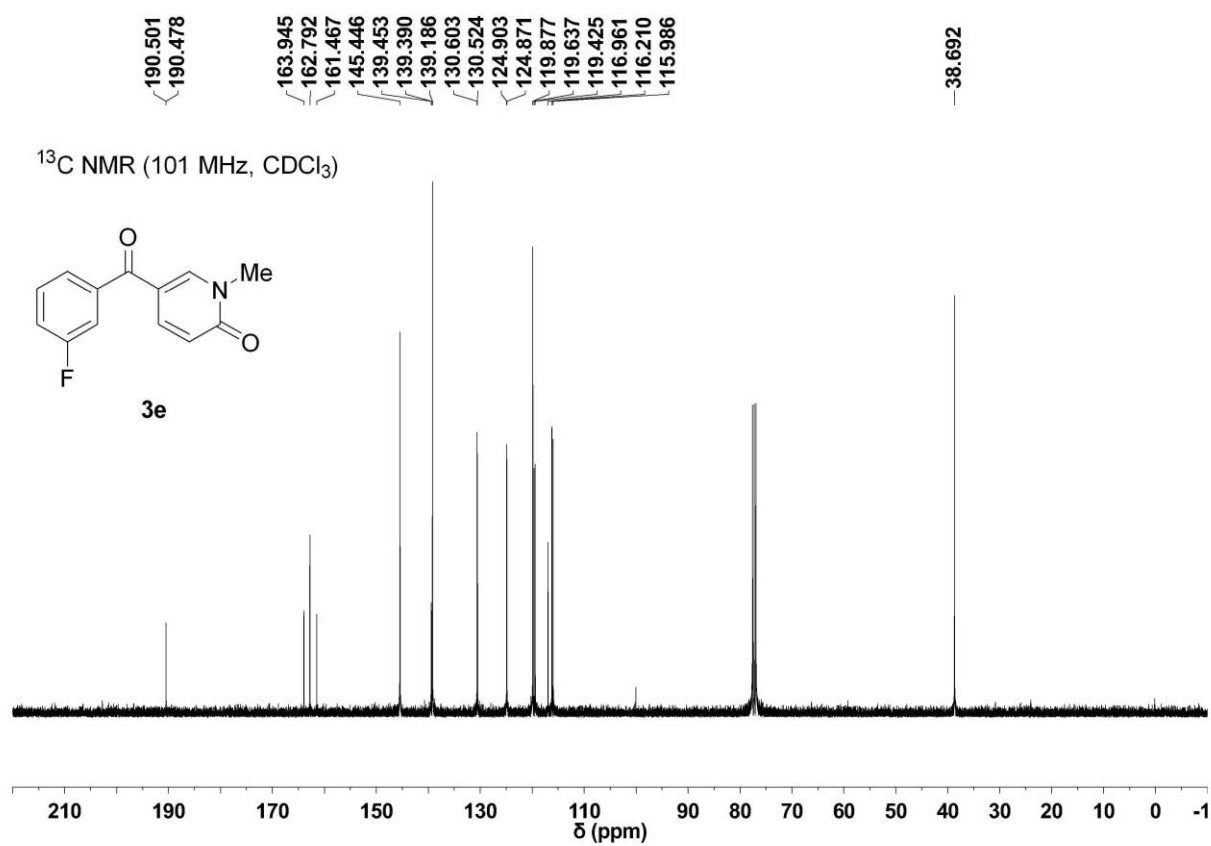

$^{19}\text{F}$  NMR (471 MHz,  $\text{CDCl}_3$ )

-111.080

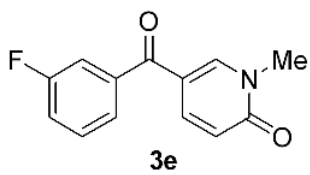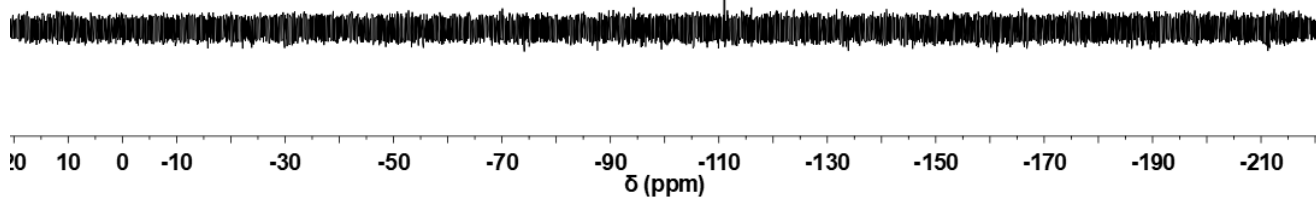

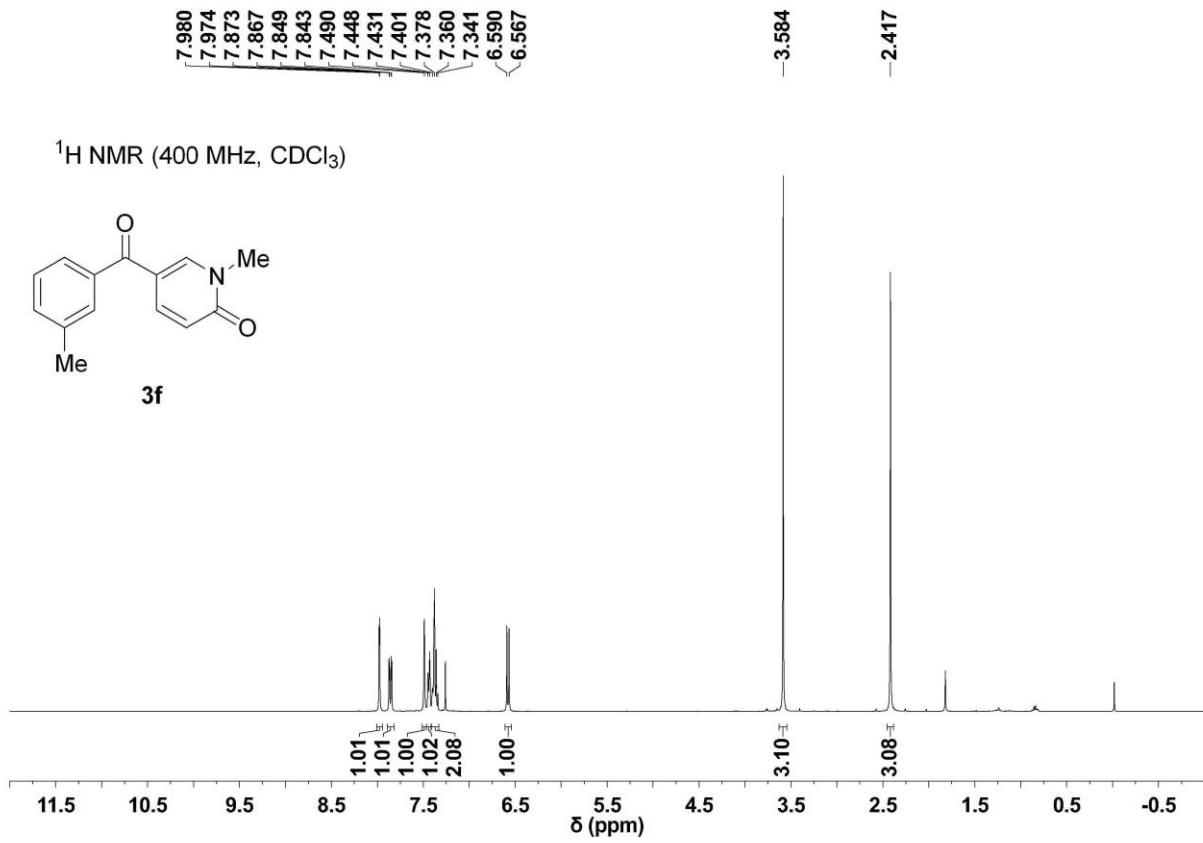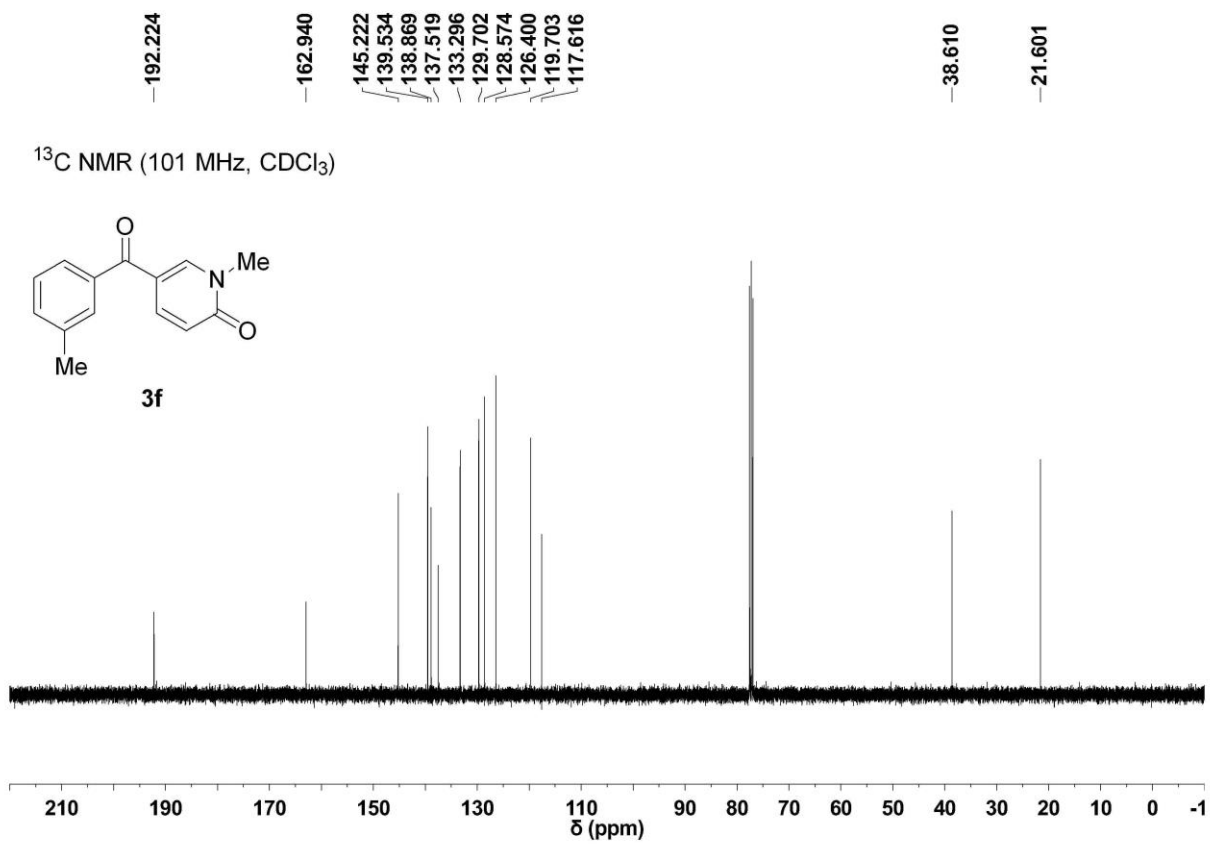



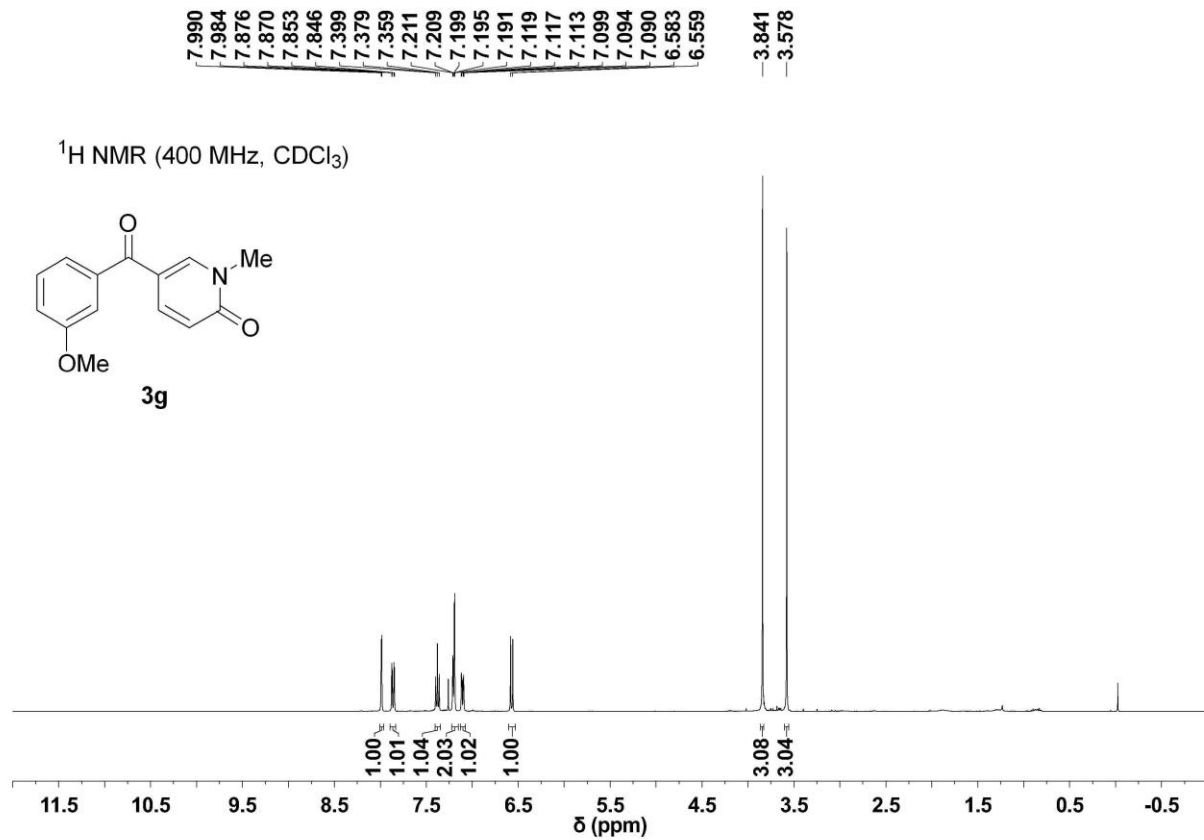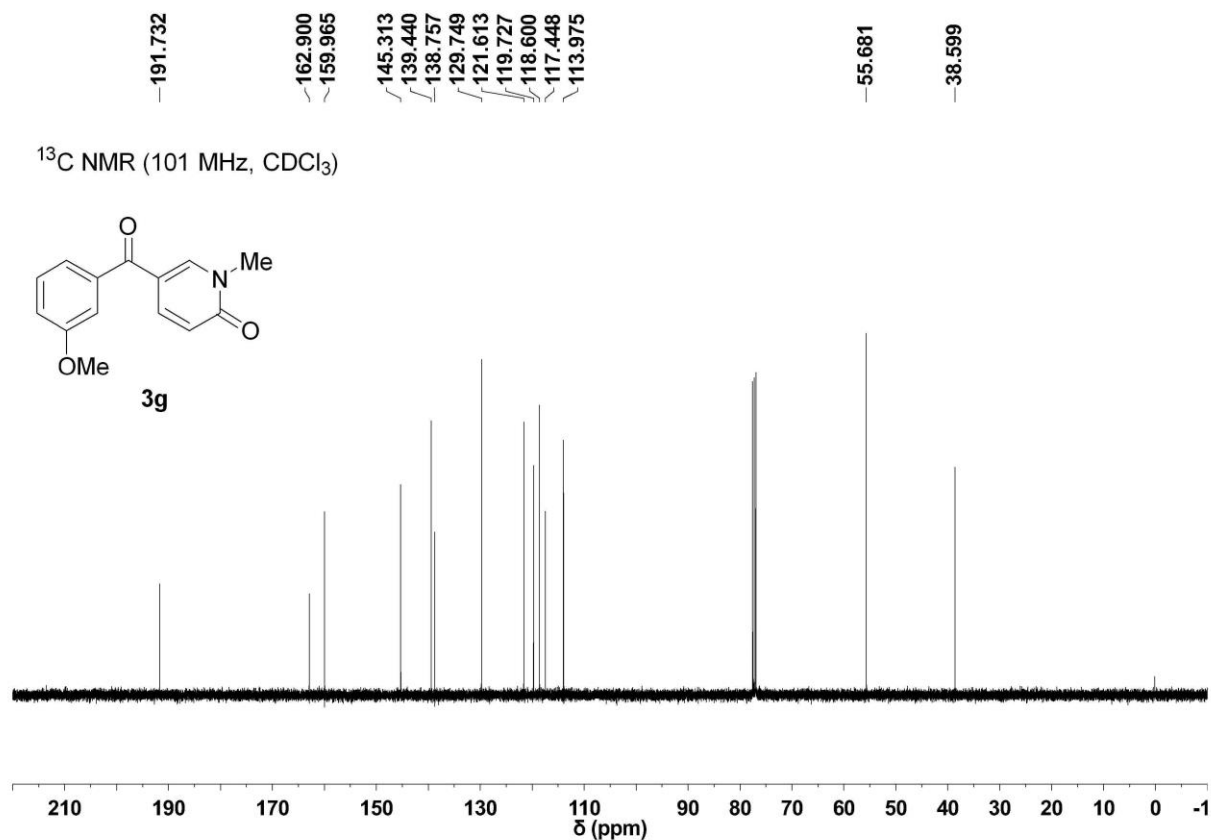

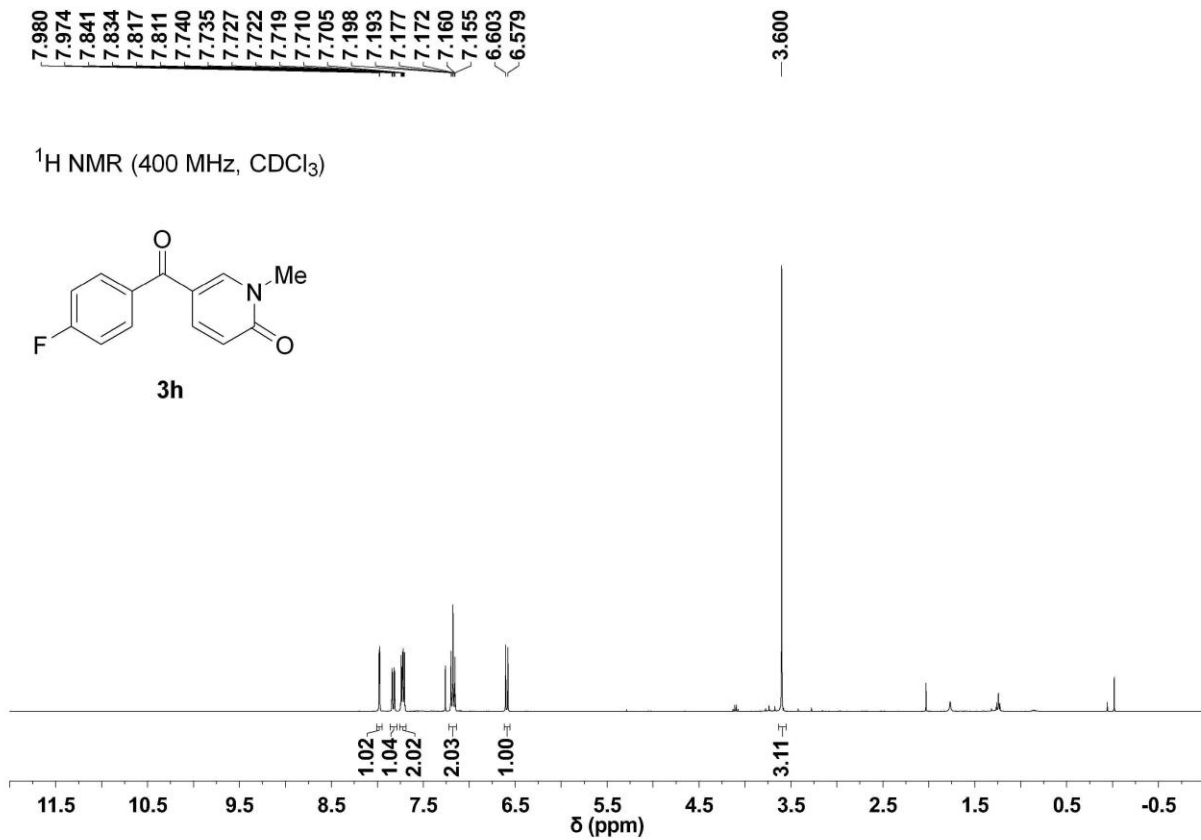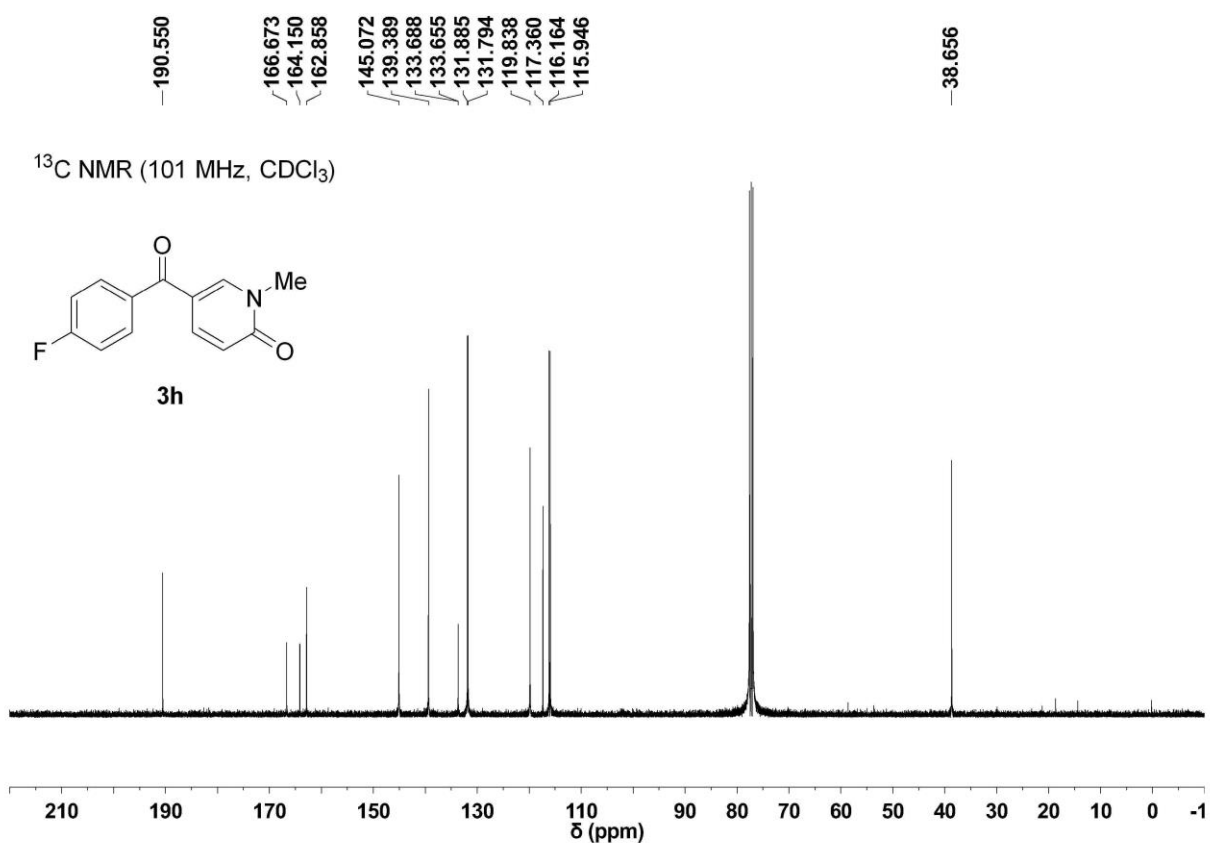

$^{19}\text{F}$  NMR (471 MHz,  $\text{CDCl}_3$ )

---105.792

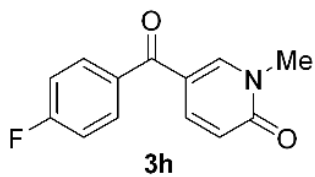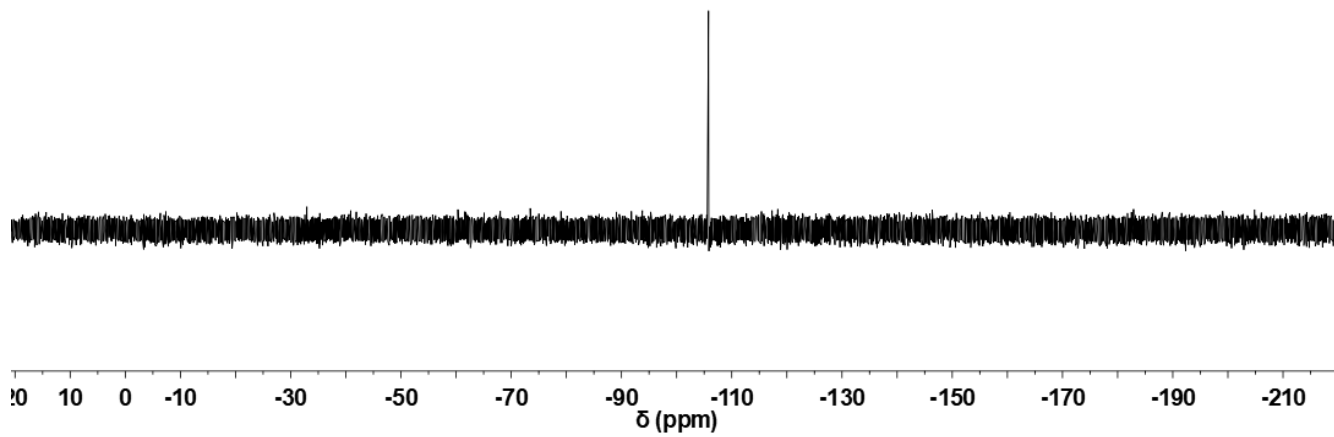

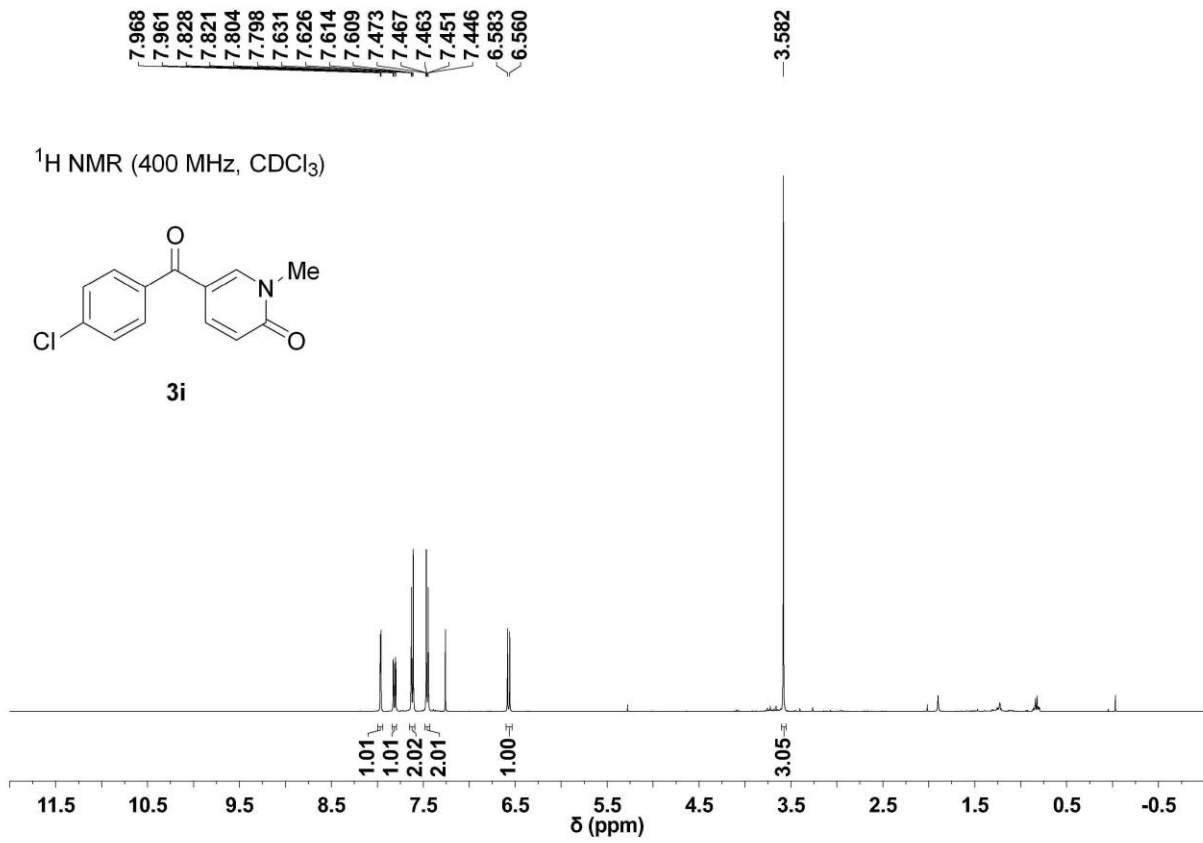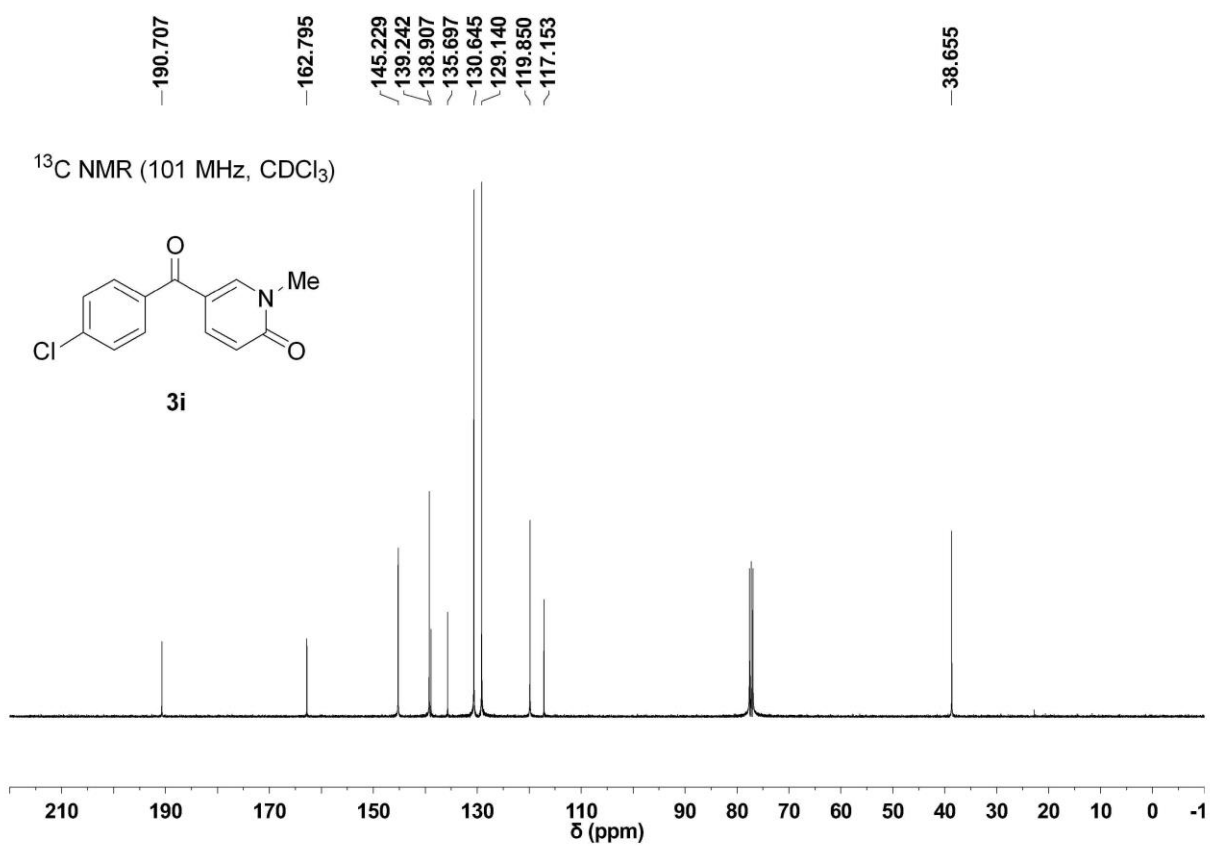

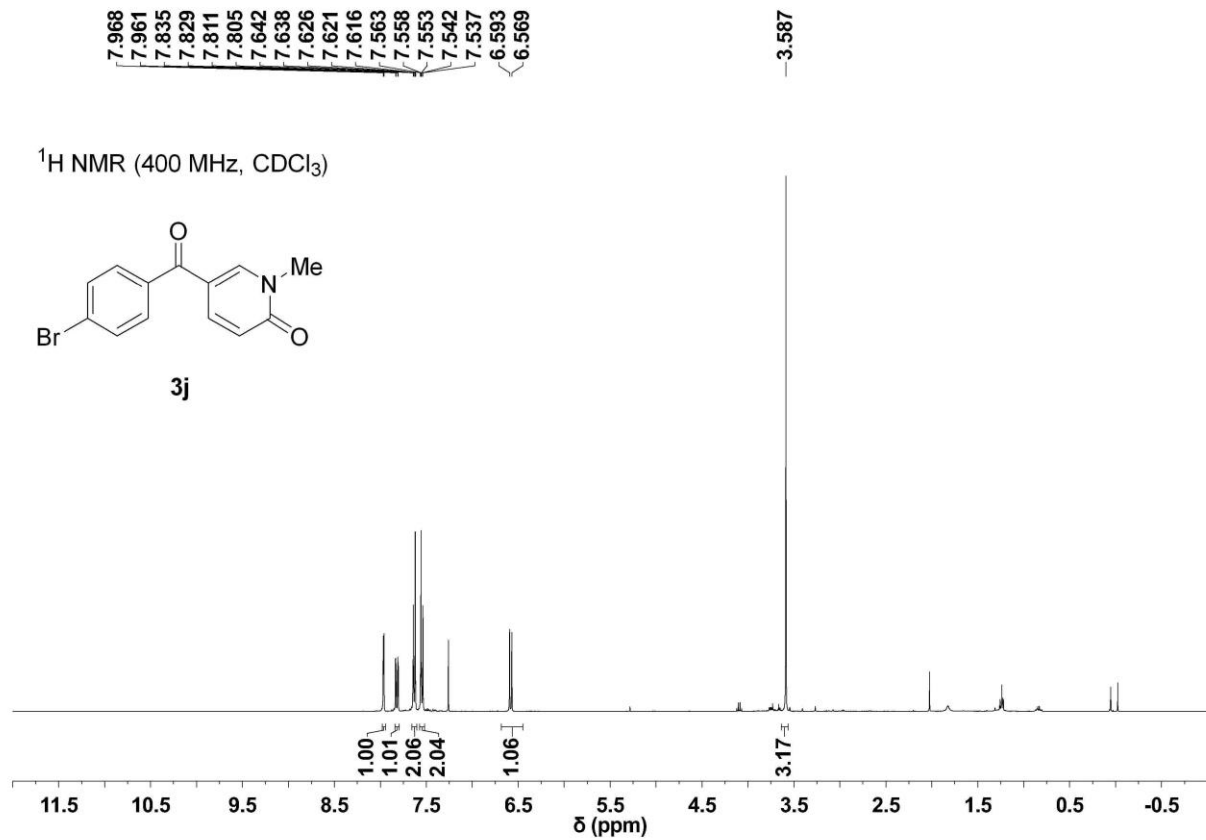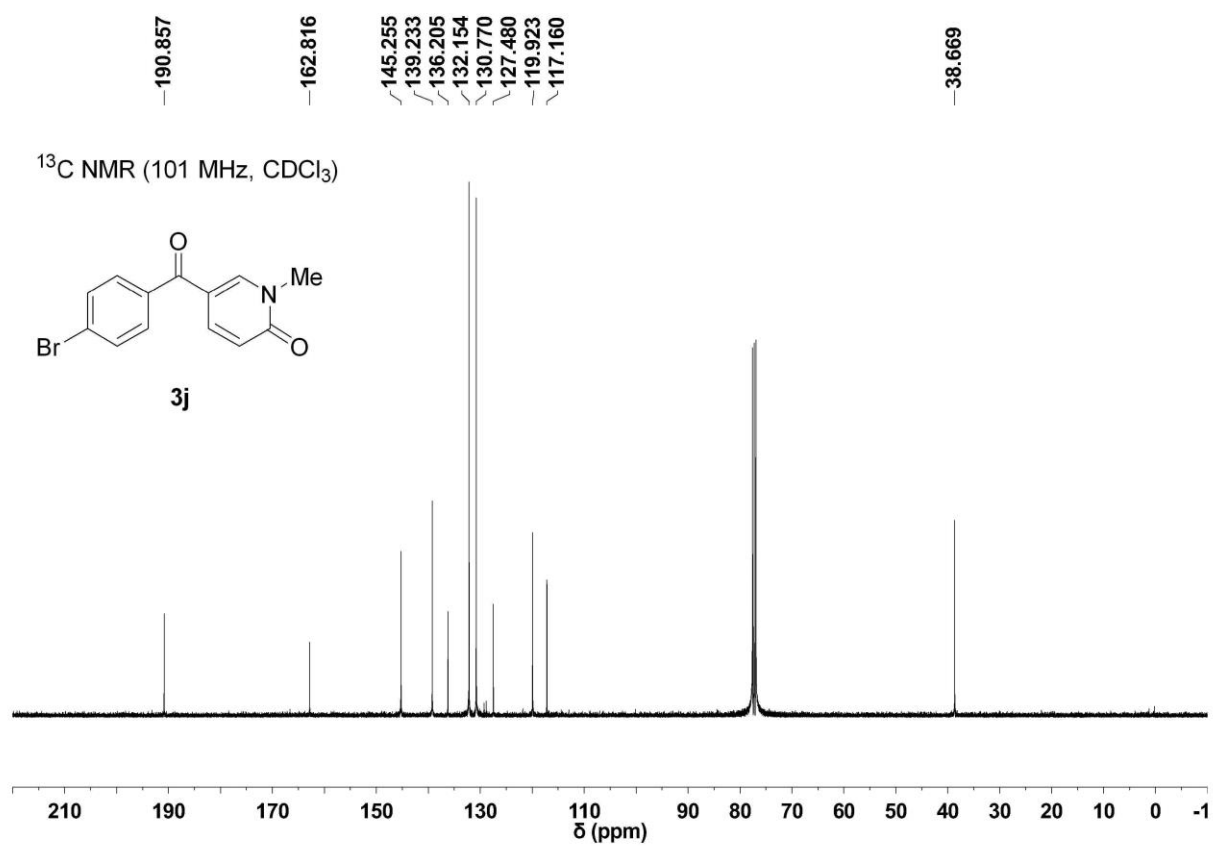

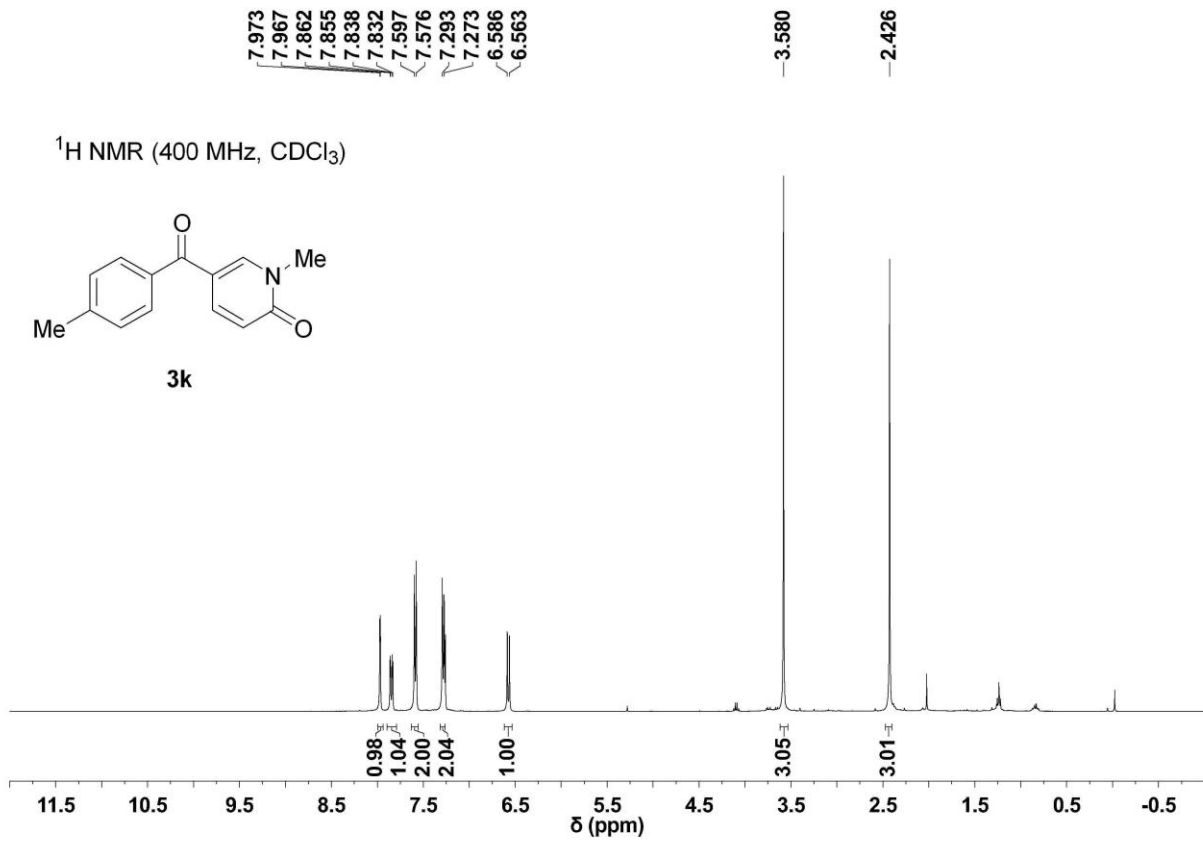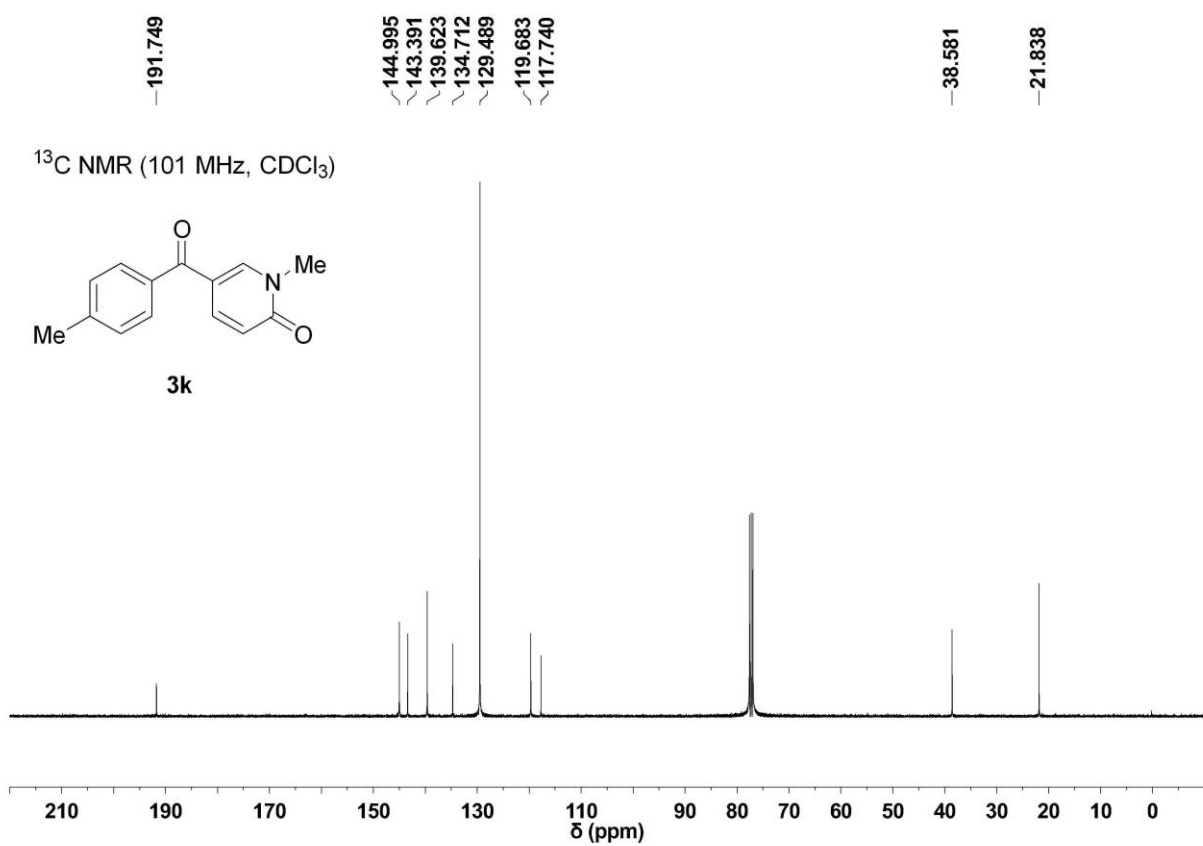

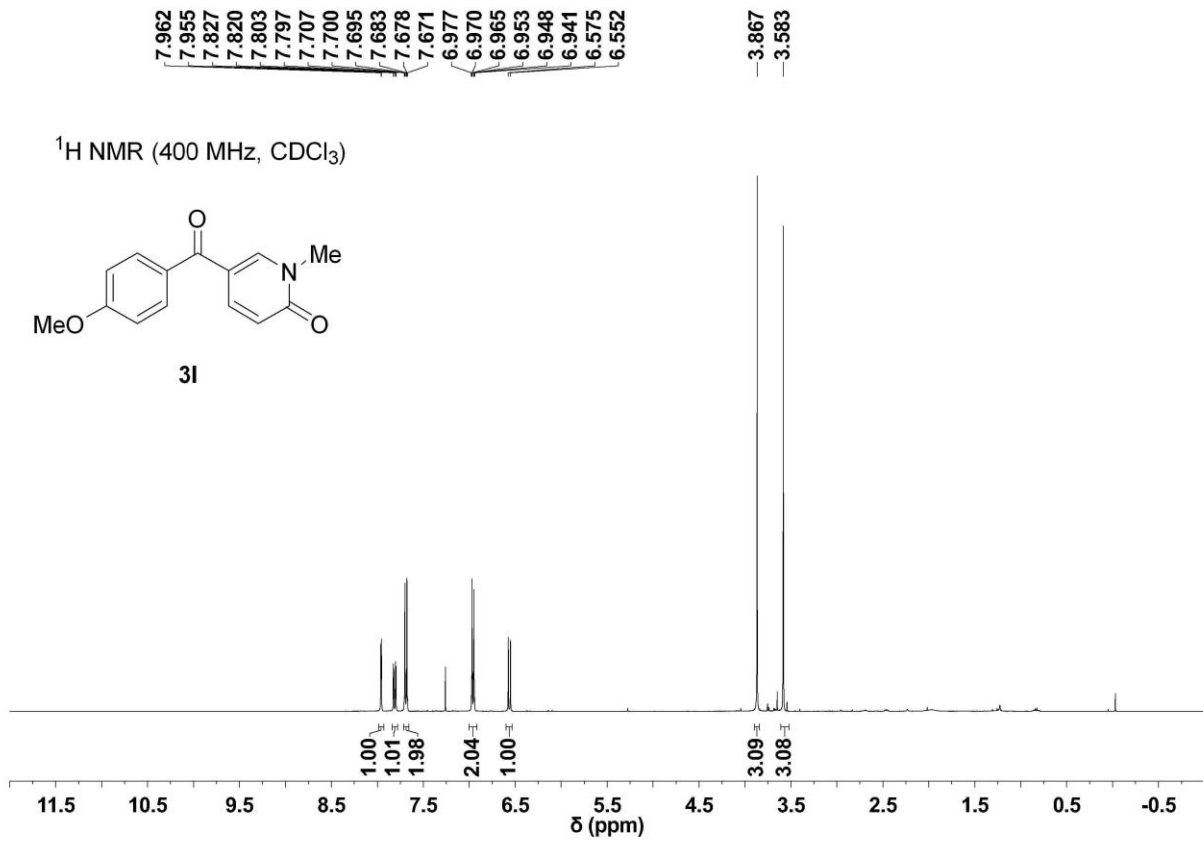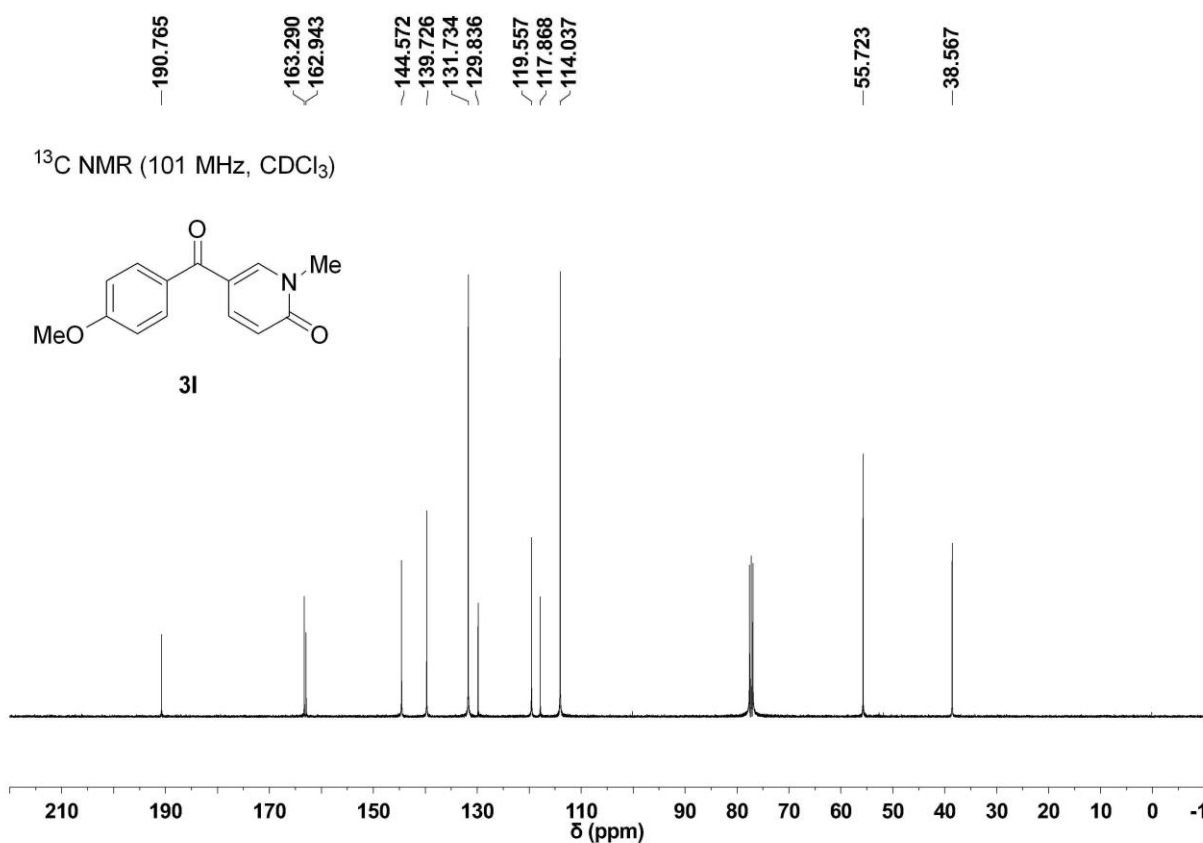

7.972  
7.967  
7.835  
7.830  
7.825  
7.816  
7.811  
7.806  
7.763  
7.746  
7.741  
7.727  
7.723  
7.260  
6.578  
6.570  
6.559  
6.551

3.570

$^1\text{H}$  NMR (500 MHz,  $\text{CDCl}_3$ )

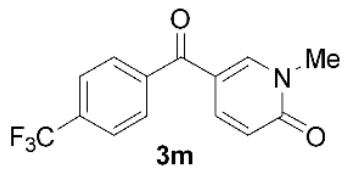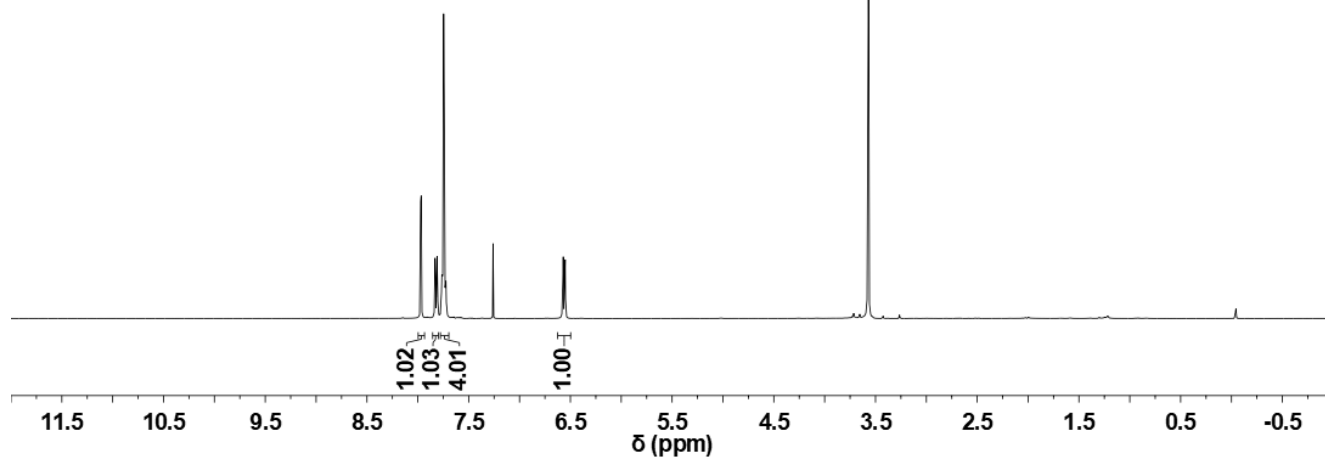

190.694

162.687

145.646

140.673

138.938

133.939

133.677

129.348

125.867

125.838

119.984

116.849

77.514

77.260

77.005

38.588

$^{13}\text{C}$  NMR (126 MHz,  $\text{CDCl}_3$ )

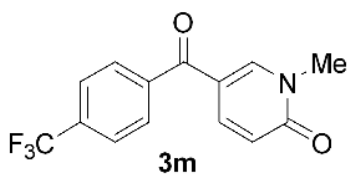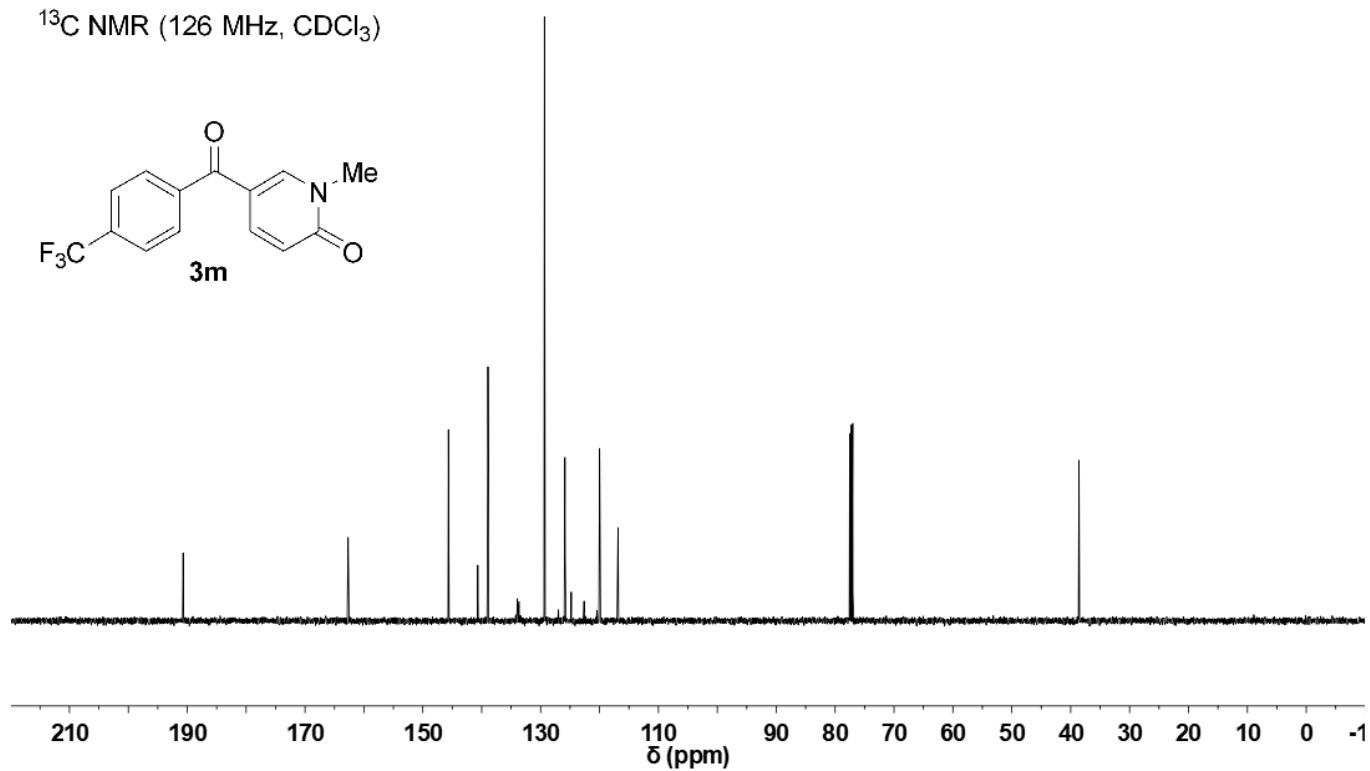



$^{19}\text{F}$  NMR (471 MHz,  $\text{CDCl}_3$ )

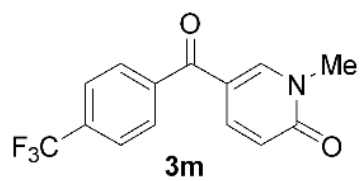

-63.037

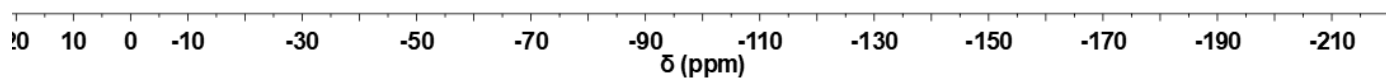

8.161  
8.157  
8.148  
8.145  
8.132  
7.966  
7.962  
7.860  
7.856  
7.851  
7.847  
7.841  
7.837  
7.832  
7.728  
7.719  
7.711  
7.702  
7.688  
6.595  
6.589  
6.576

3.948  
3.581

<sup>1</sup>H NMR (500 MHz, CDCl<sub>3</sub>)

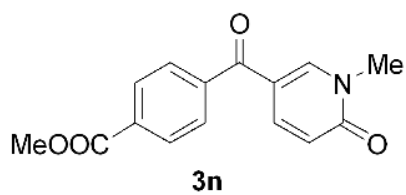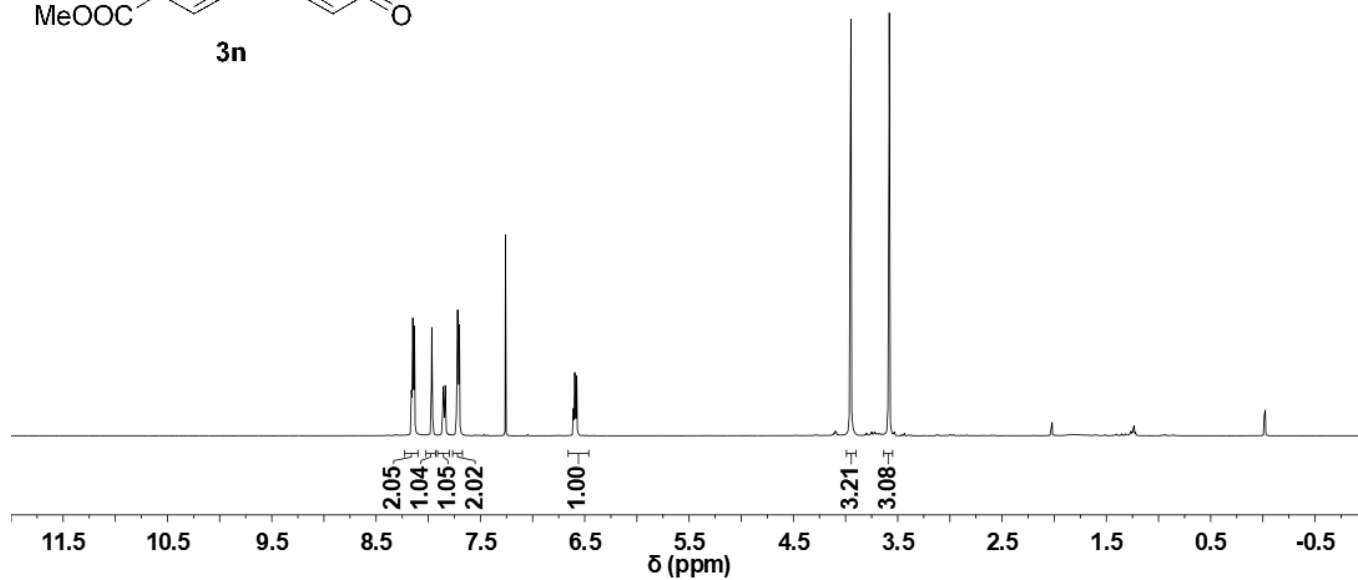

191.238

166.312  
162.789

145.616

141.276

139.080

133.433

130.035

129.018

120.013

117.105

77.514

77.260

77.006

52.745

38.667

<sup>13</sup>C NMR (126 MHz, CDCl<sub>3</sub>)

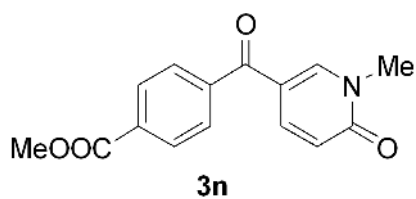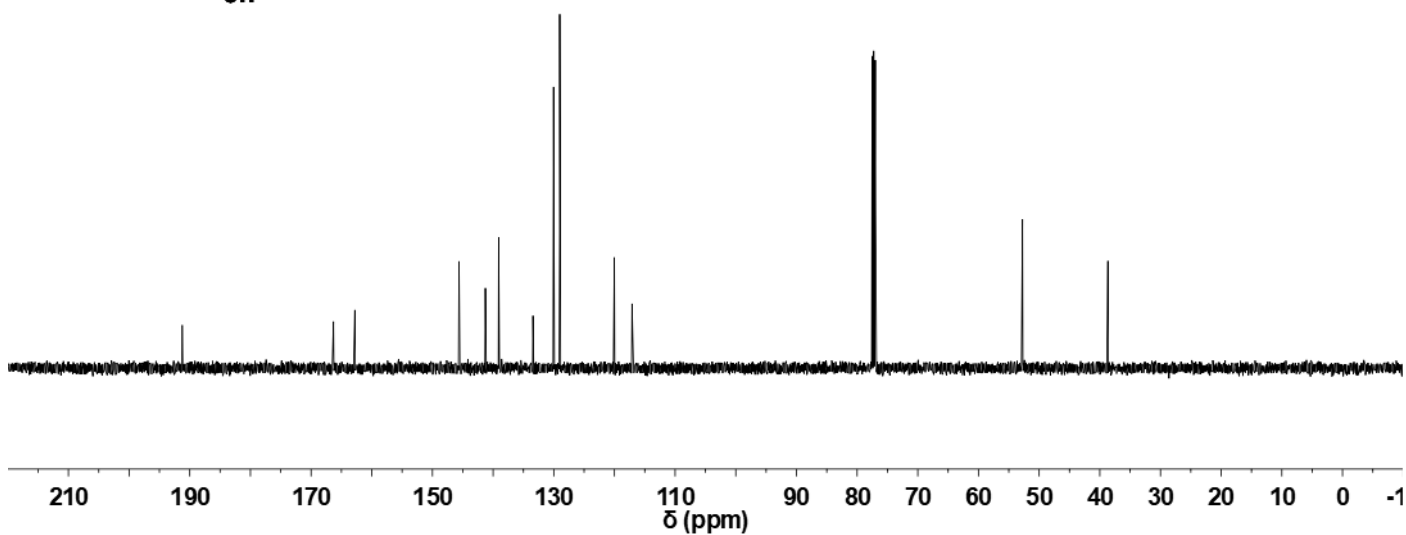

7.958  
7.953  
7.847  
7.842  
7.828  
7.823  
7.668  
7.651  
7.518  
7.501  
7.089  
6.595  
6.576

3.585

1.510

<sup>1</sup>H NMR (500 MHz, CDCl<sub>3</sub>)

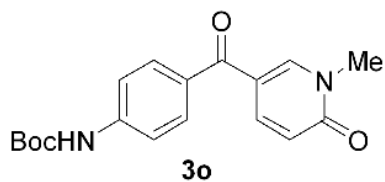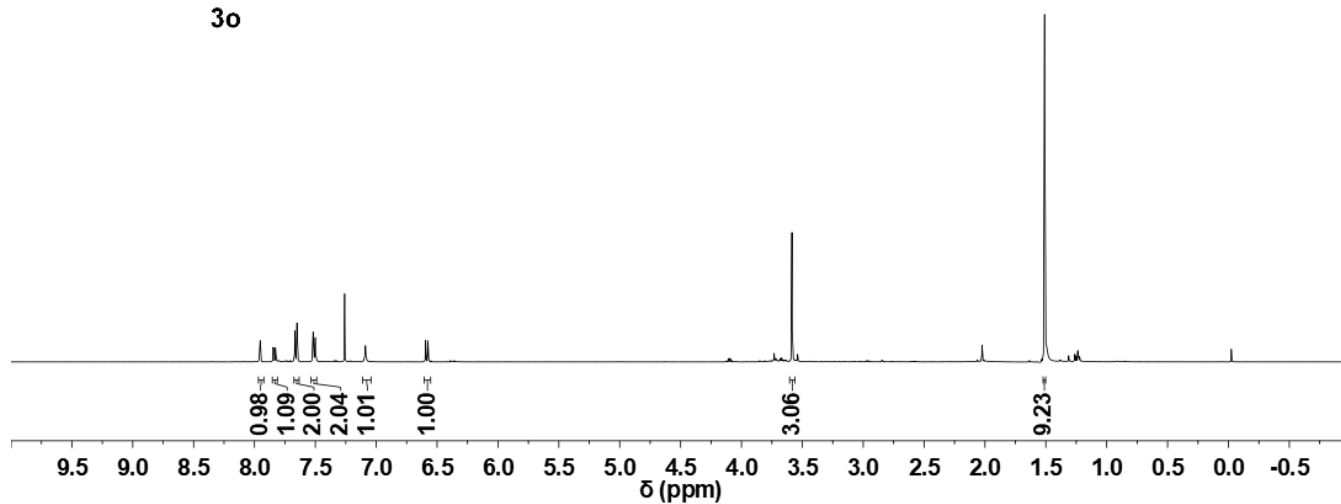

190.817

163.024

152.573

144.766

142.924

139.695

131.529

130.939

119.709

117.914

81.528

38.571

28.469

<sup>13</sup>C NMR (126 MHz, CDCl<sub>3</sub>)

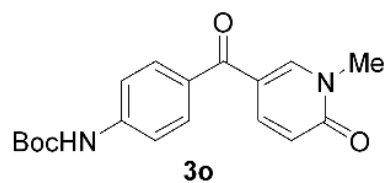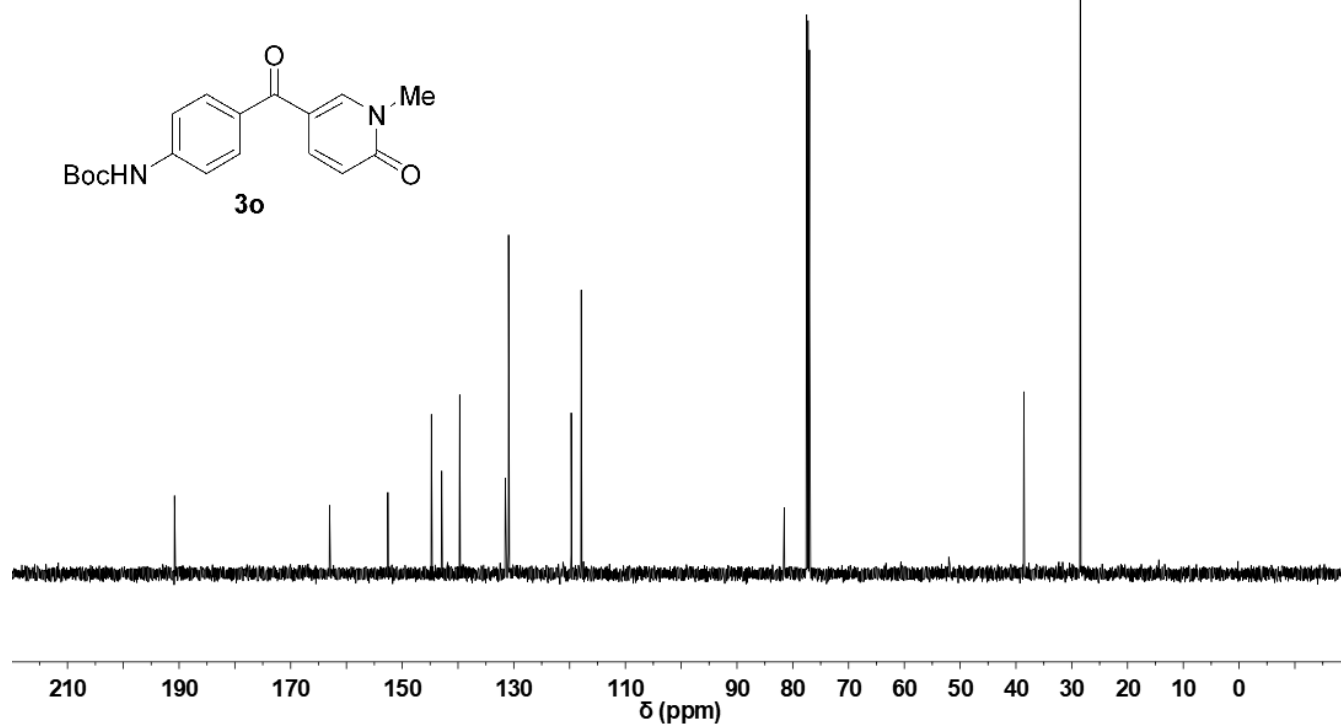

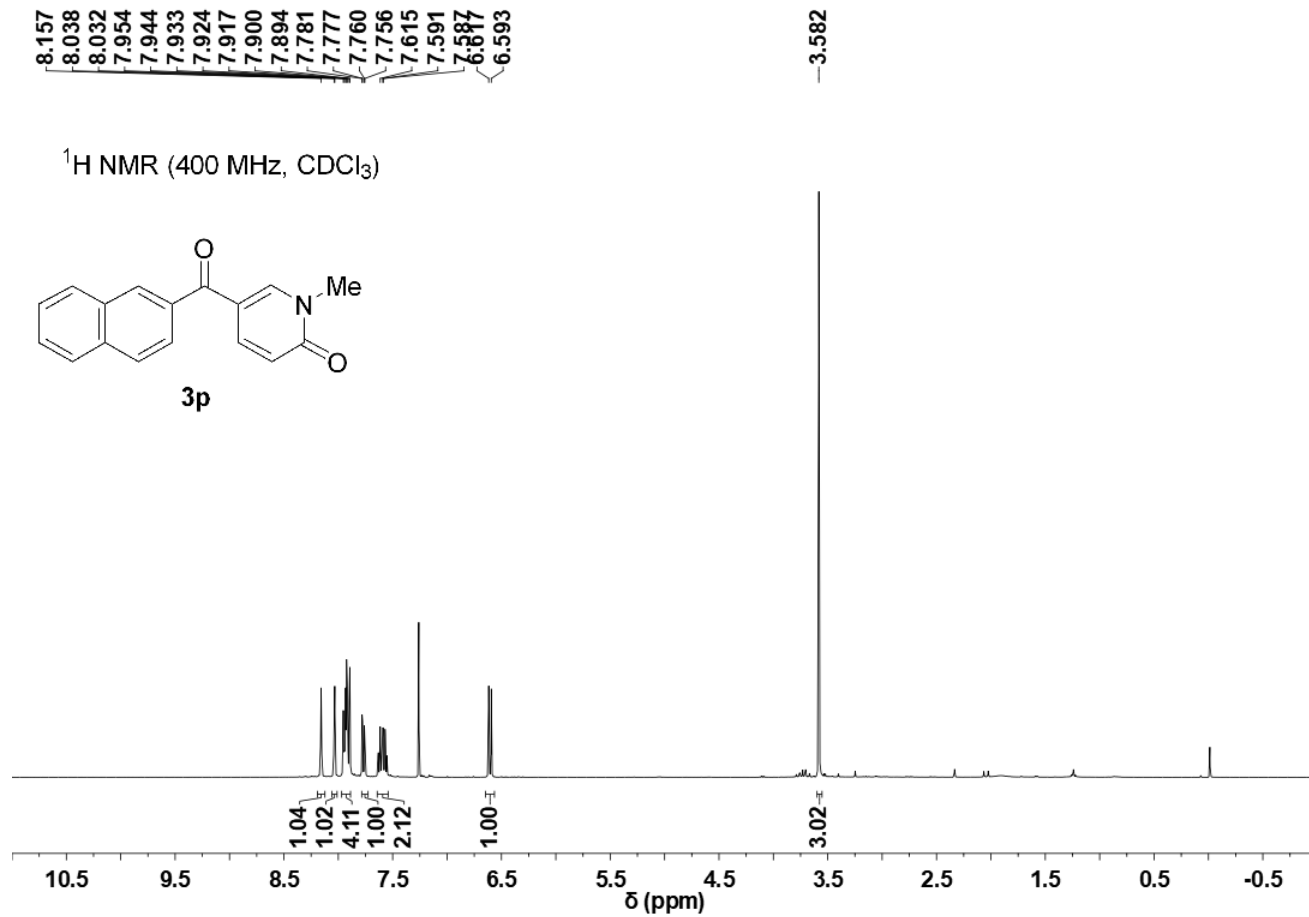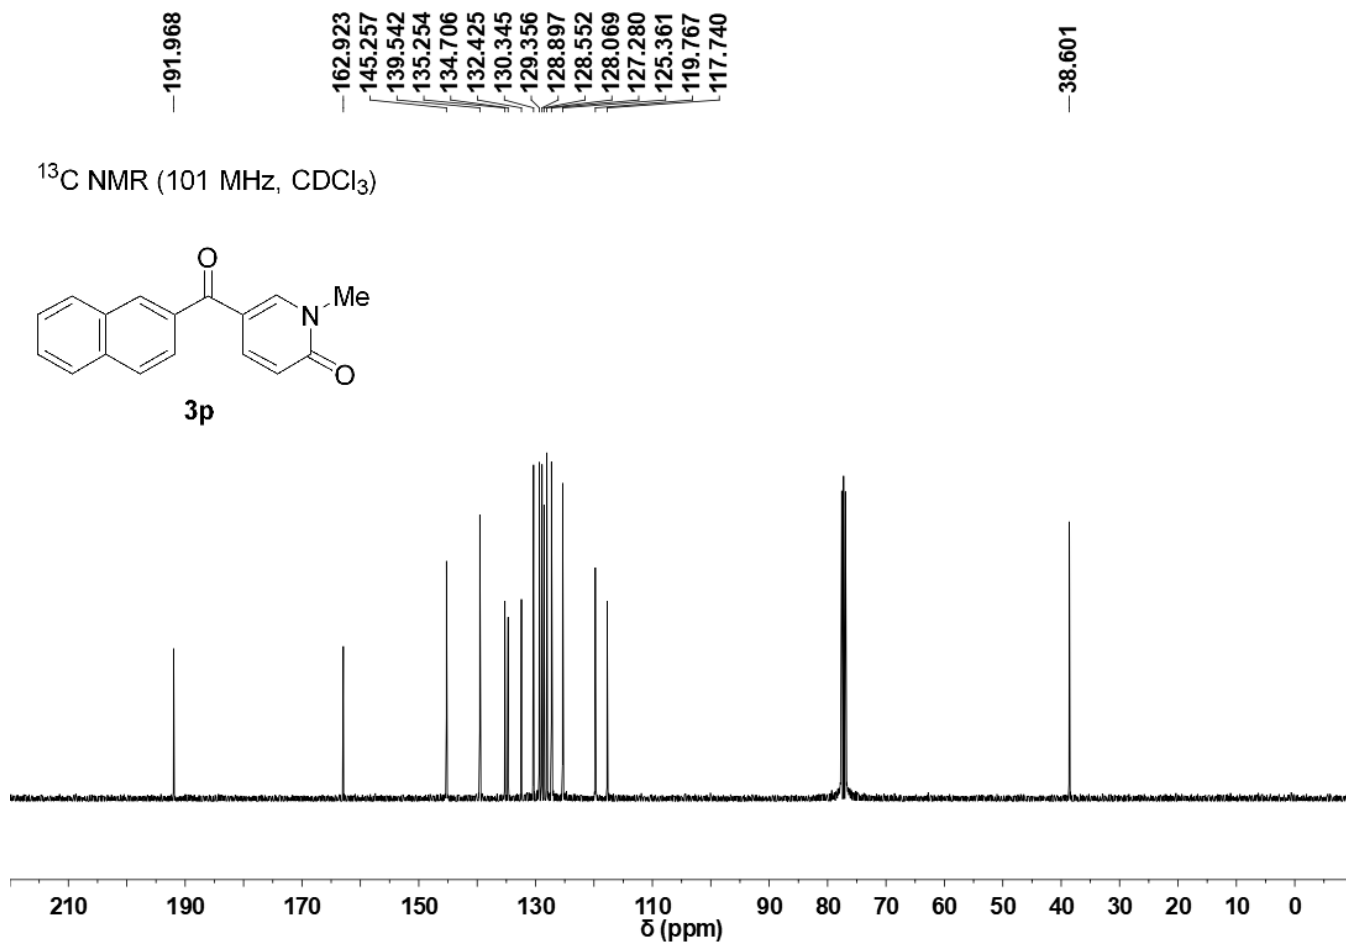

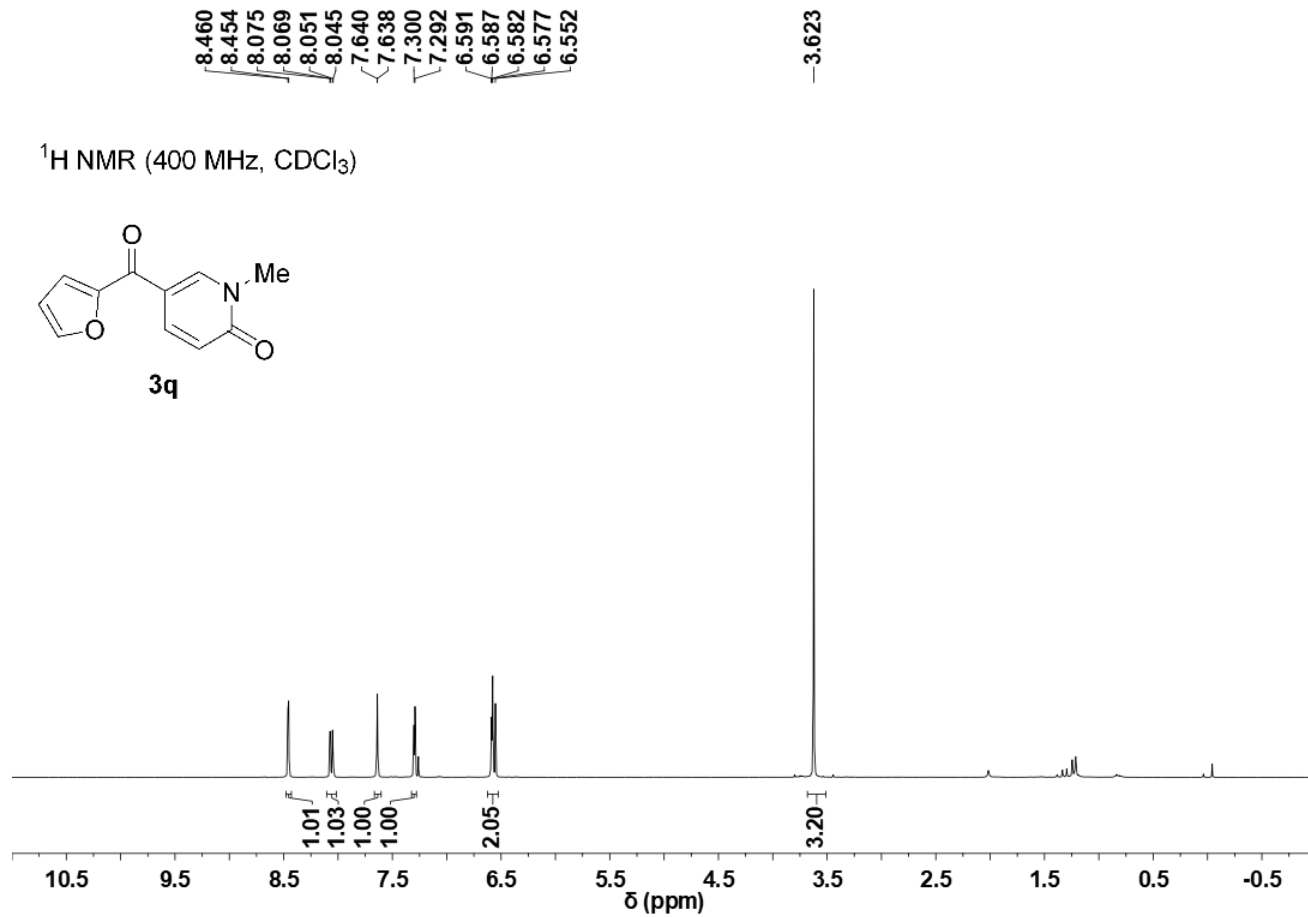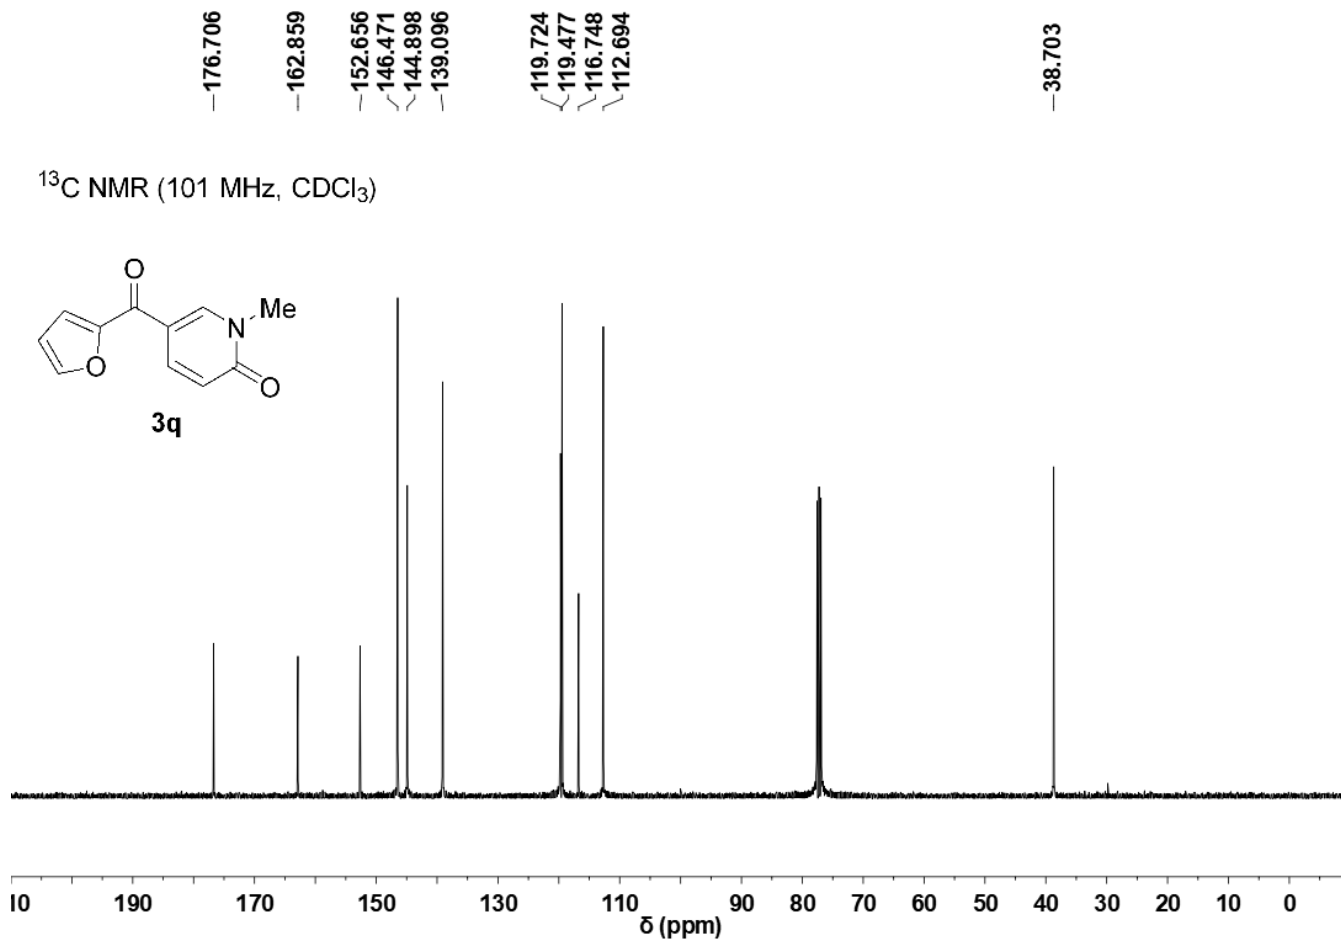

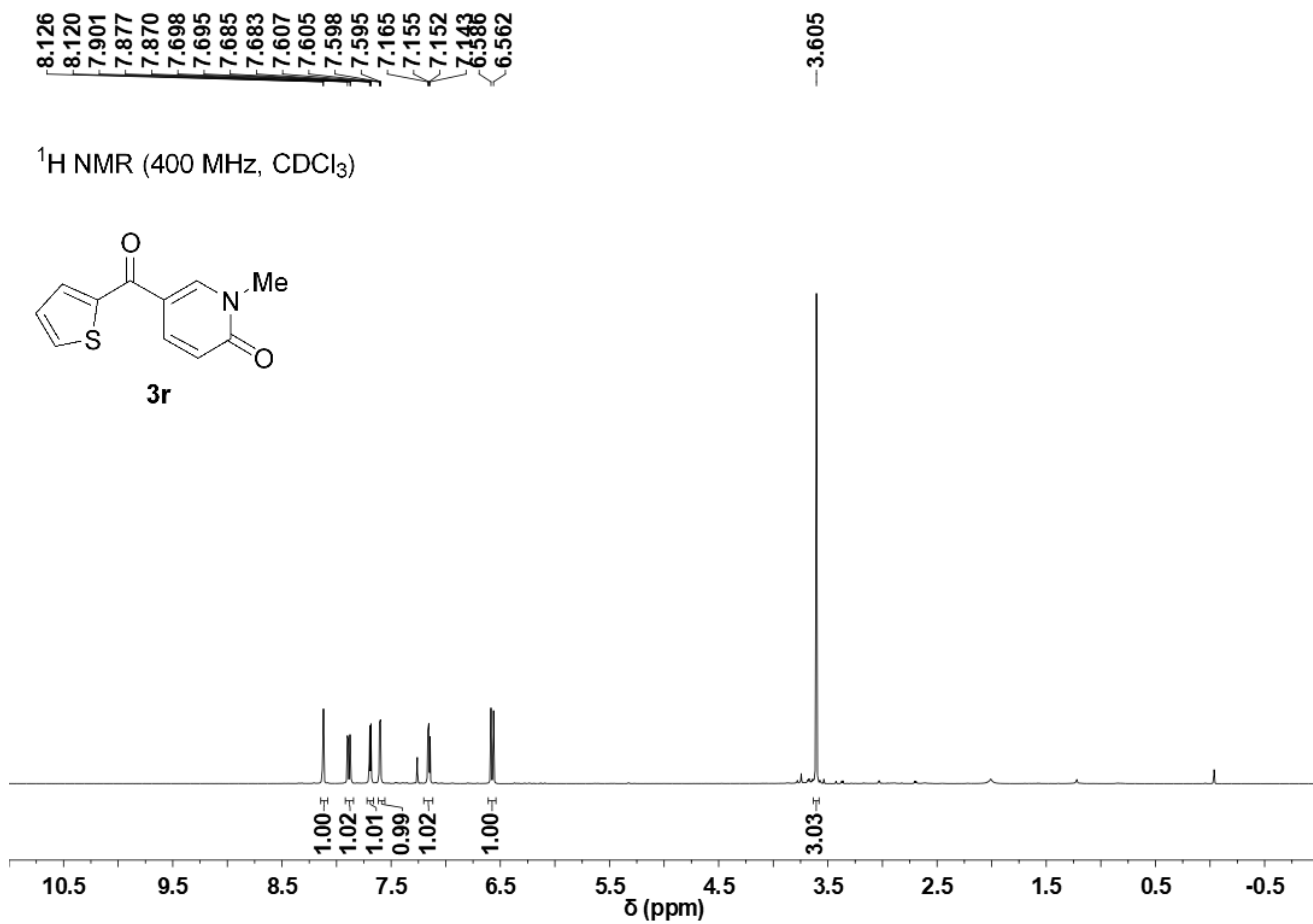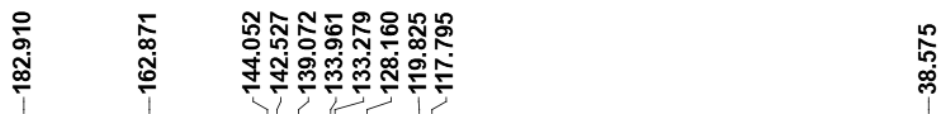

8.183  
8.177  
8.031  
8.025  
8.007  
8.001  
6.574  
6.551  
4.812  
4.807  
4.802  
4.569  
4.565  
4.560  
4.192  
-3.613

$^1\text{H}$  NMR (400 MHz,  $\text{CDCl}_3$ )

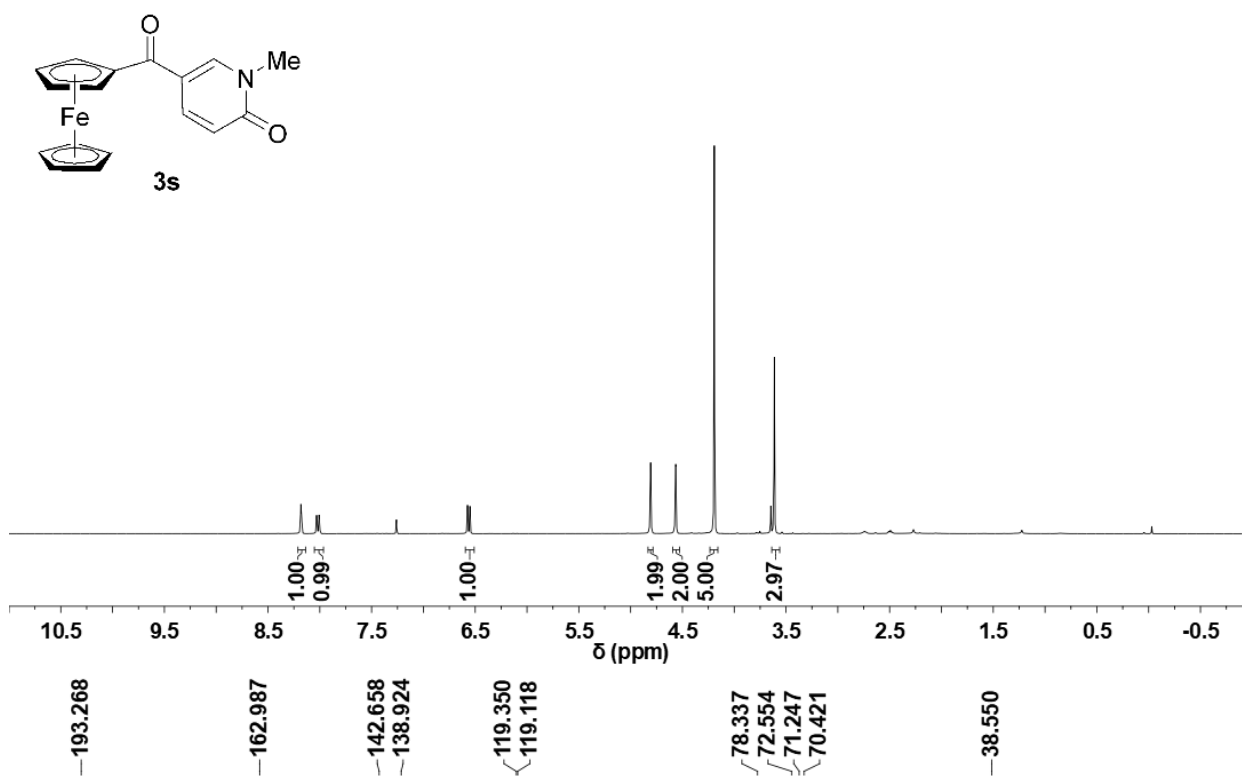

$^{13}\text{C}$  NMR (101 MHz,  $\text{CDCl}_3$ )

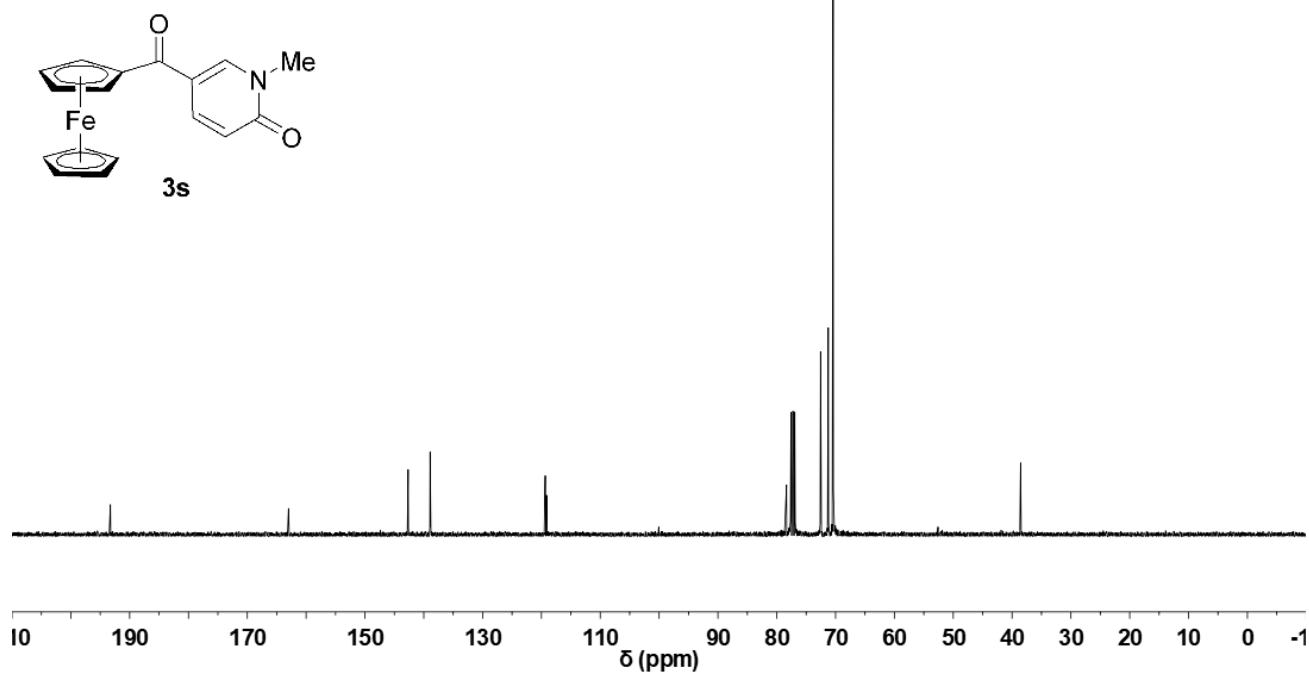

<sup>1</sup>H NMR (400 MHz, CDCl<sub>3</sub>)

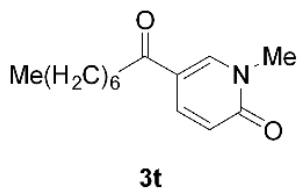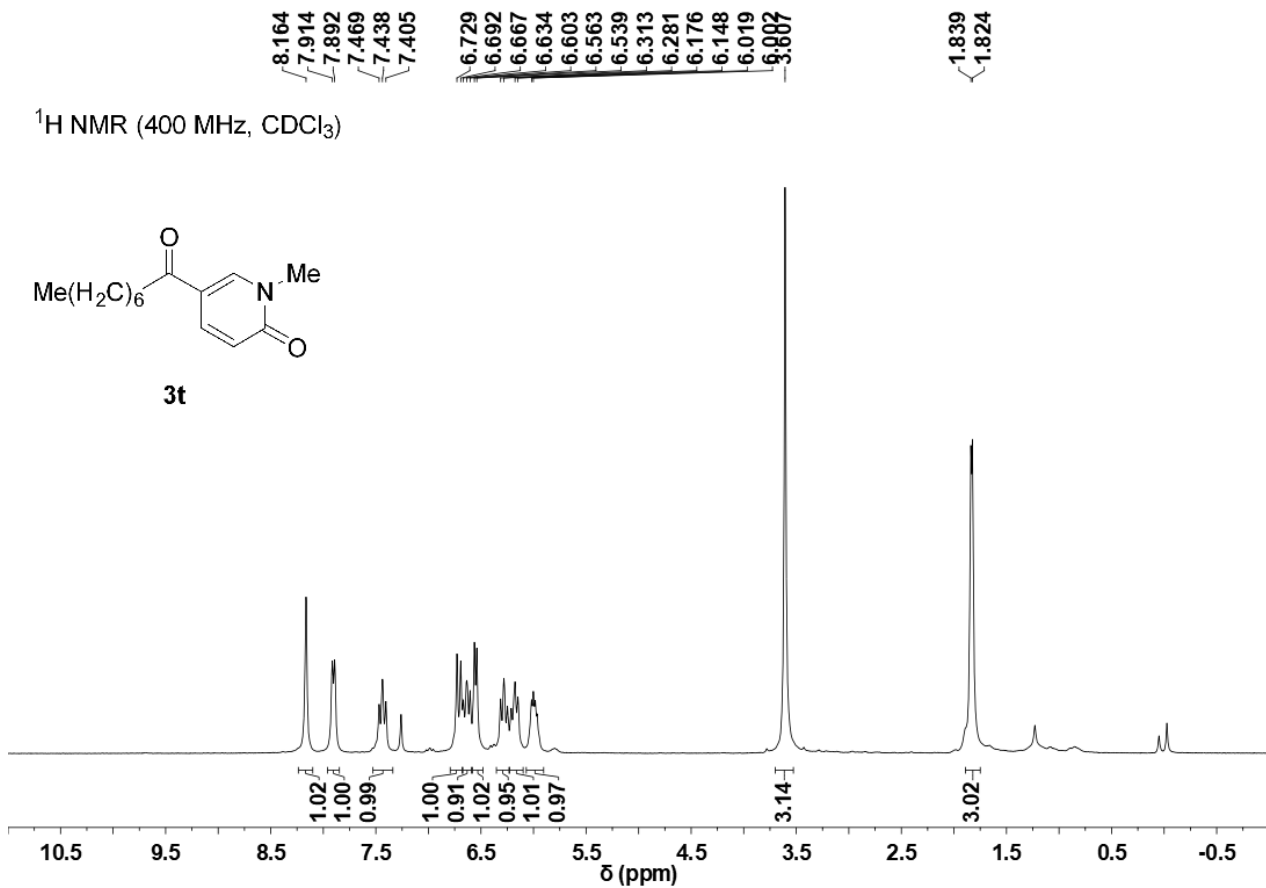

<sup>13</sup>C NMR (101 MHz, CDCl<sub>3</sub>)

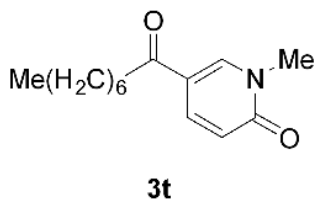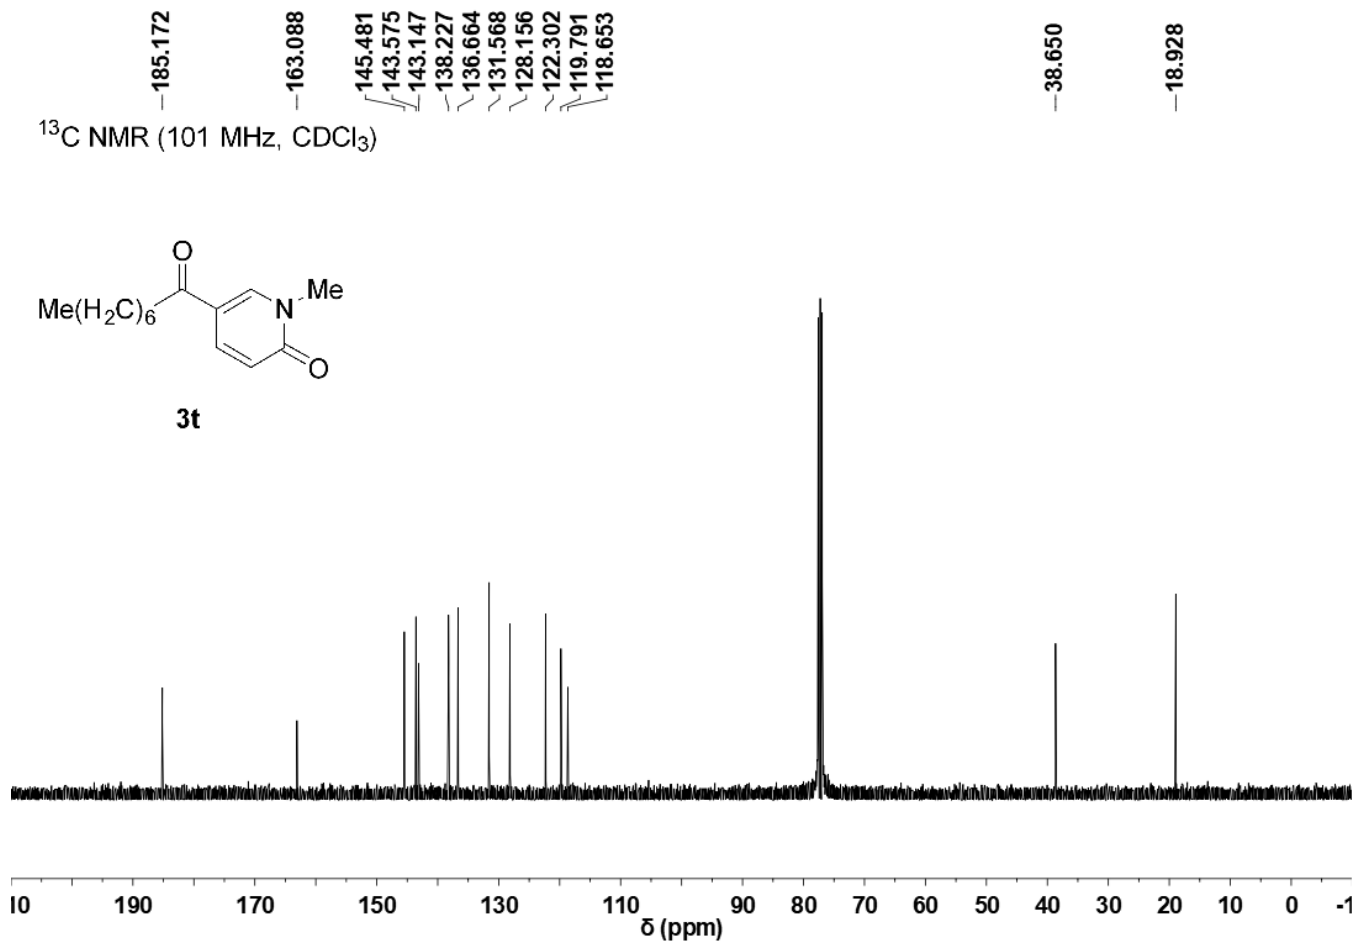



8.125  
8.117  
7.870  
7.863  
7.846  
7.839

6.554  
6.530

3.604

2.435

$^1\text{H}$  NMR (400 MHz,  $\text{CDCl}_3$ )

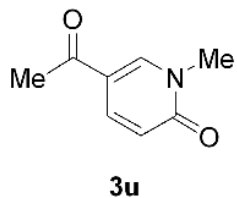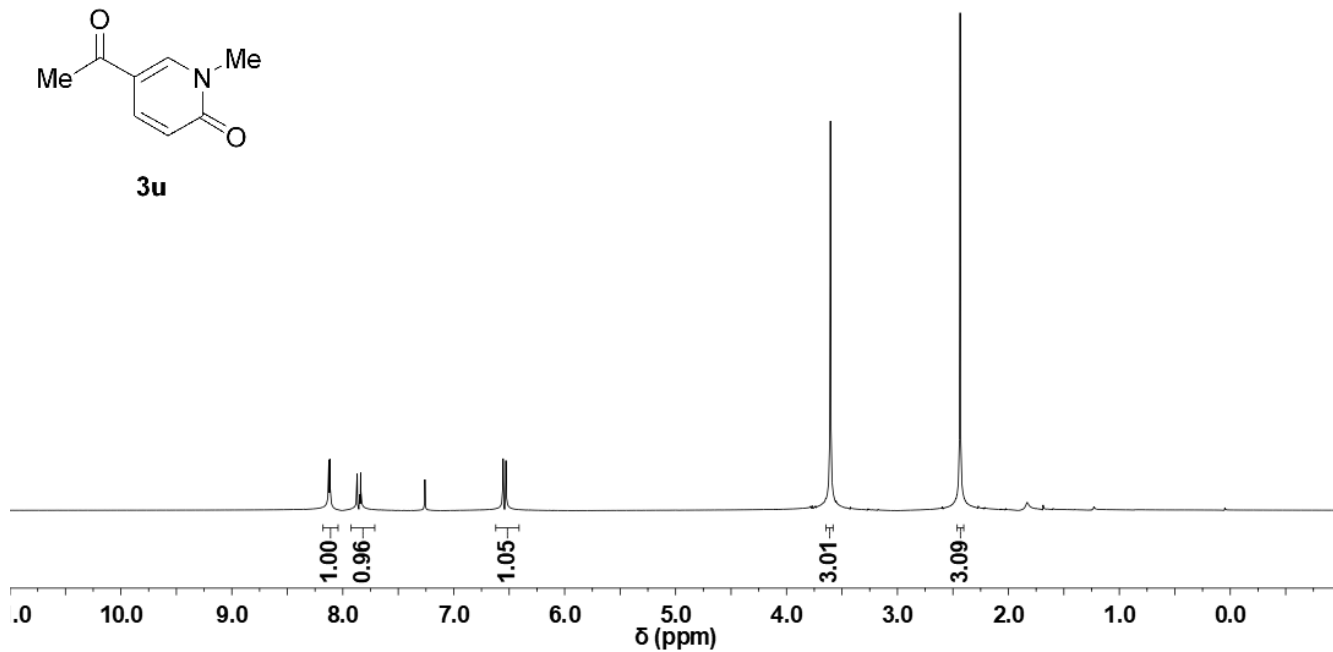

193.303

163.012

143.359

138.011

119.787

117.925

38.612

25.997

$^{13}\text{C}$  NMR (101 MHz,  $\text{CDCl}_3$ )

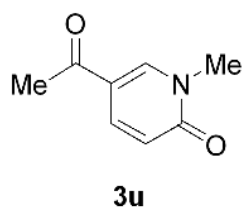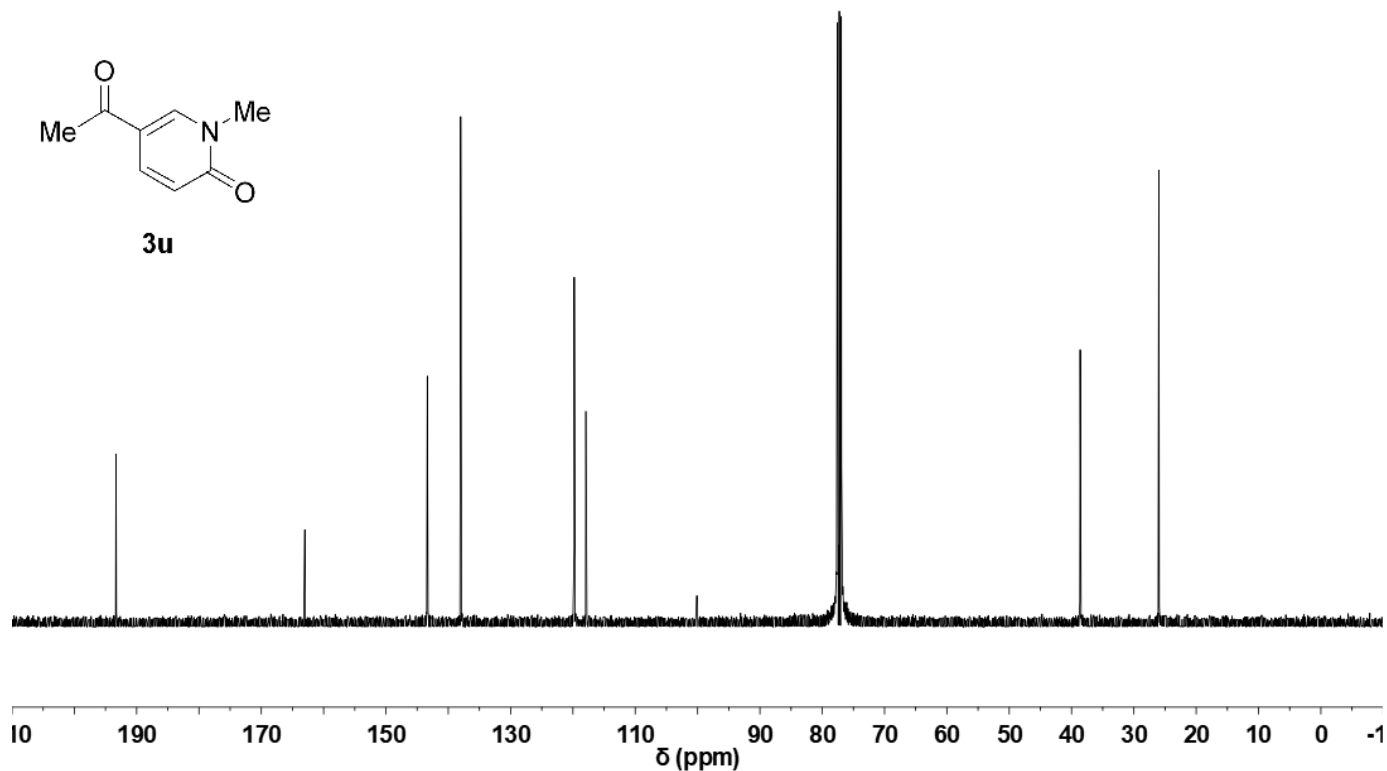

7.929  
7.924  
7.818  
7.813  
7.795  
7.789  
6.559  
6.535  
6.371  
5.400  
5.388  
4.601  
4.588  
3.589  
2.389  
2.381  
2.374  
2.343  
2.331  
2.316  
2.198  
2.168  
2.156  
2.123  
2.113  
2.079  
2.029  
1.876  
1.851  
1.762  
1.751  
1.735  
1.726  
1.705  
1.665  
1.637  
1.612  
1.578  
1.571  
1.547  
1.531  
1.518  
1.502  
1.339  
1.324  
1.165  
1.139  
1.131  
1.089  
1.066

<sup>1</sup>H NMR (400 MHz, CDCl<sub>3</sub>)

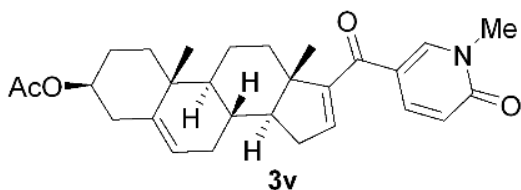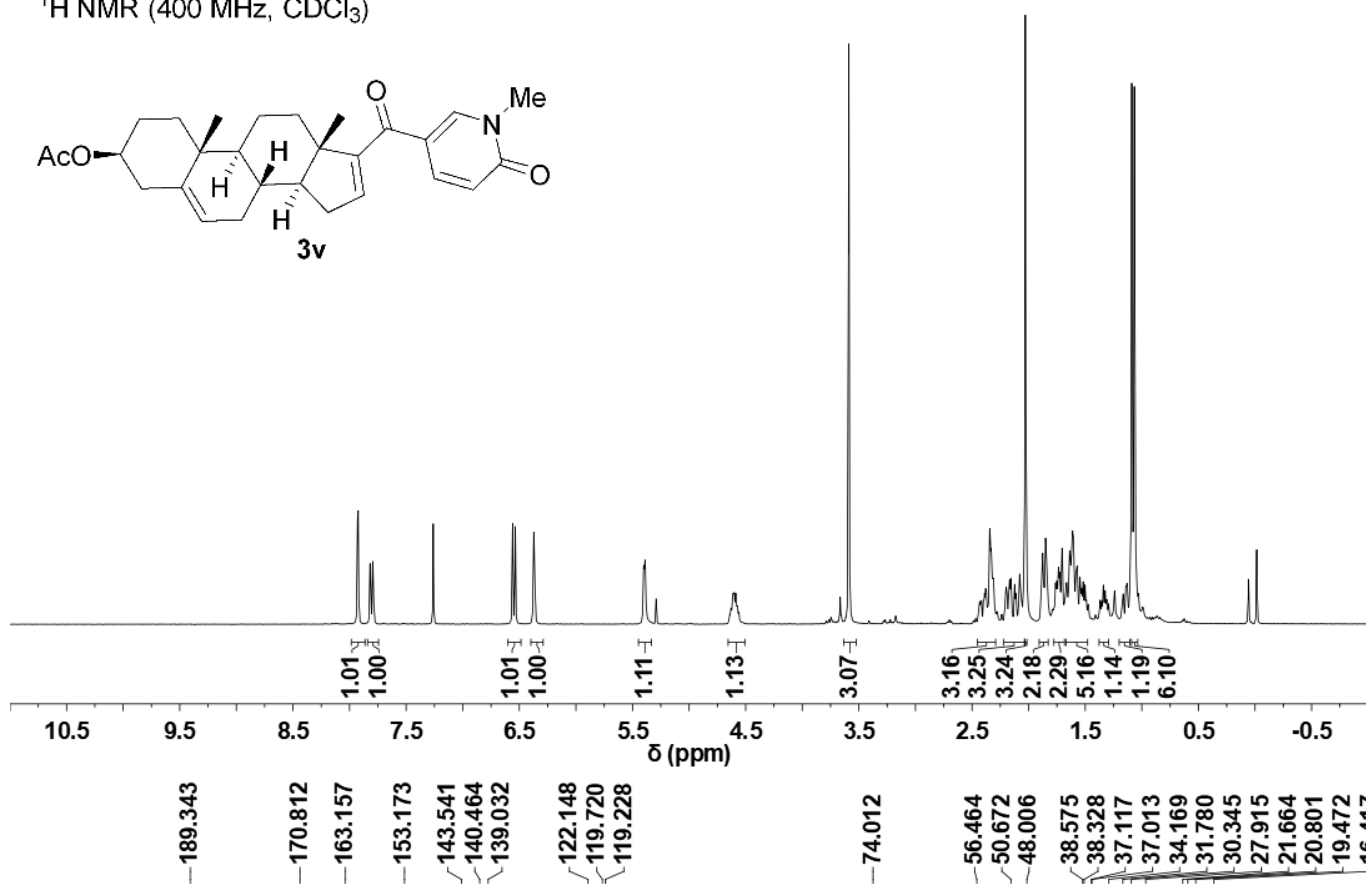

<sup>13</sup>C NMR (101 MHz, CDCl<sub>3</sub>)

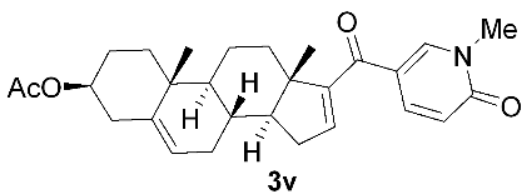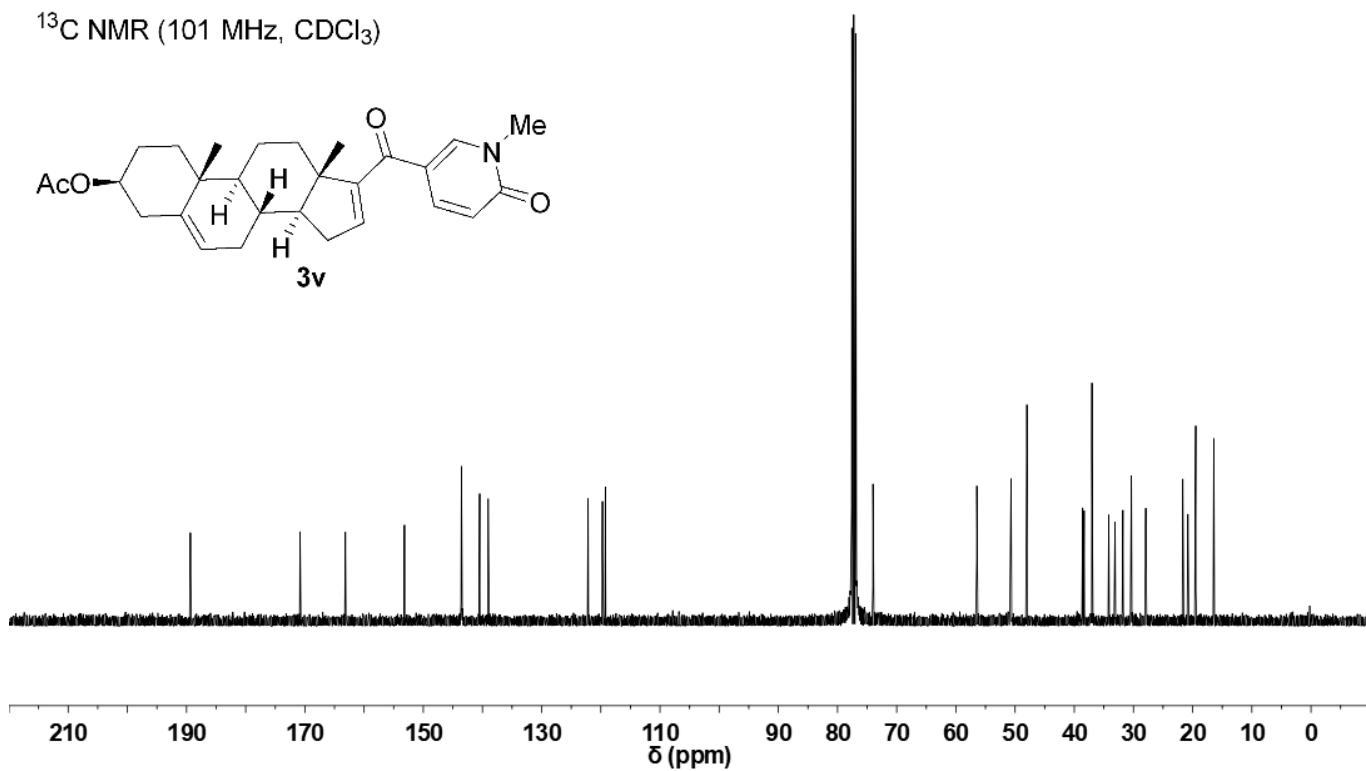

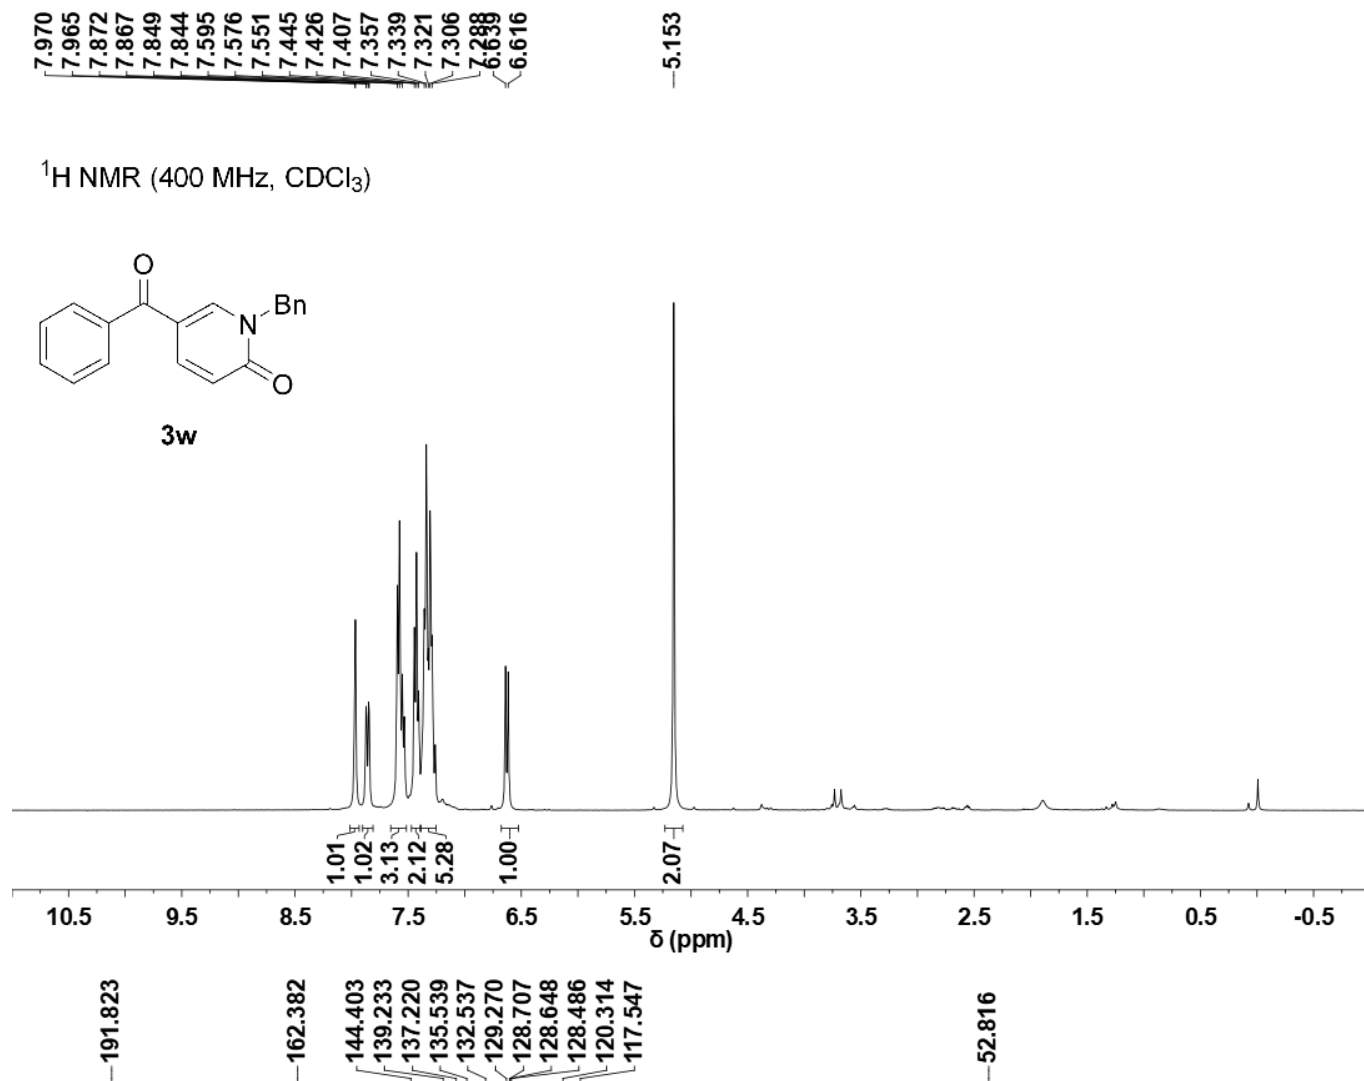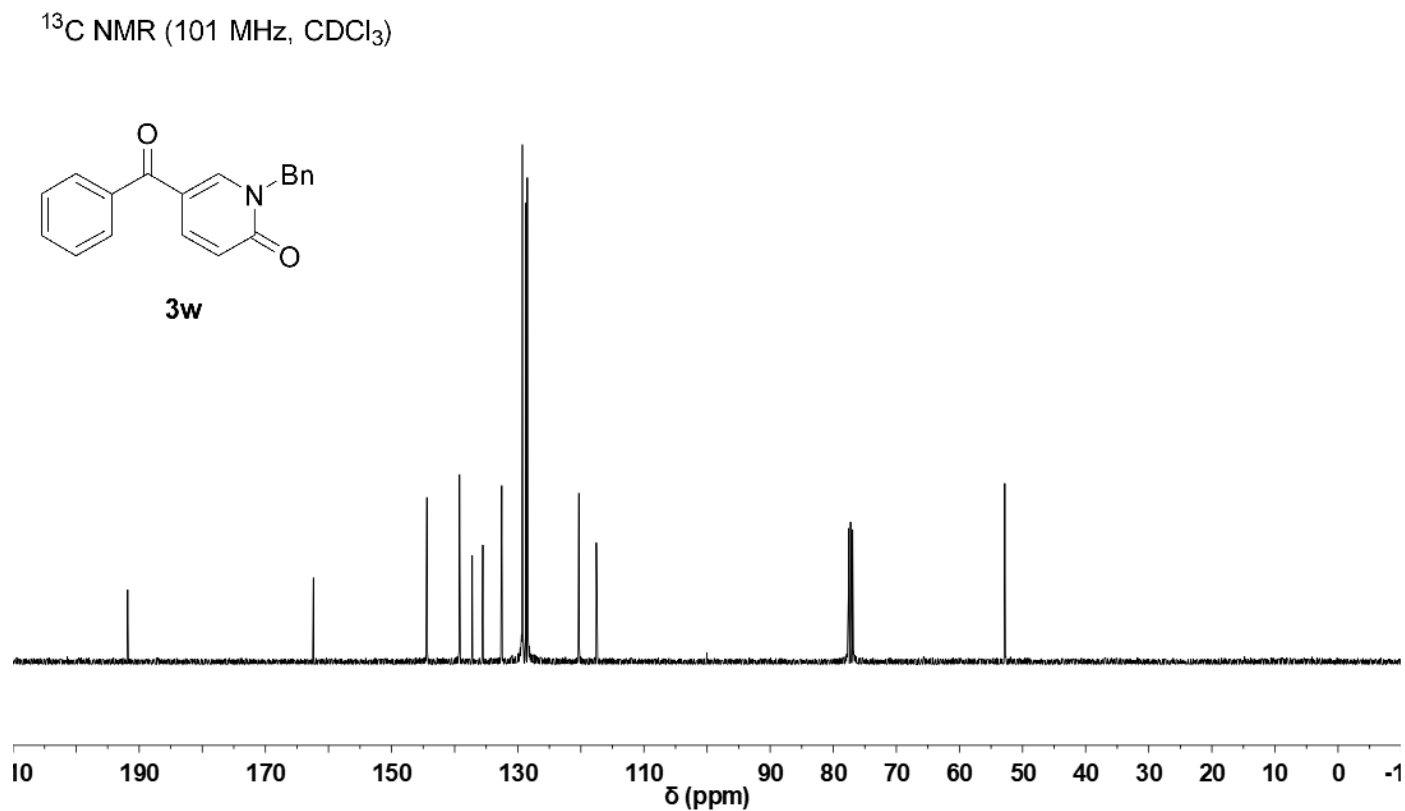

7.937  
7.931  
7.911  
7.905  
7.701  
7.697  
7.683  
7.680  
7.628  
7.609  
7.590  
7.523  
7.503  
7.485  
7.260  
6.678  
6.652

4.669  
4.648  
4.627  
4.606

<sup>1</sup>H NMR (400 MHz, CDCl<sub>3</sub>)

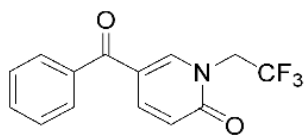

3x

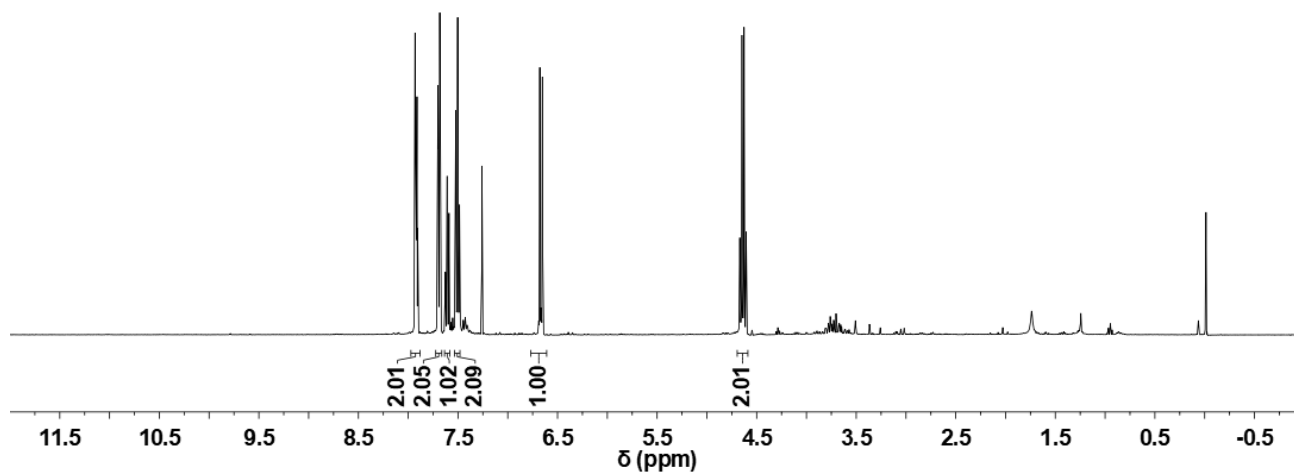

191.525  
161.556  
144.281  
140.066  
136.977  
132.973  
129.370  
128.982  
124.779  
121.992  
120.851  
118.342

48.860  
48.513  
48.163  
47.817

<sup>13</sup>C NMR (101 MHz, CDCl<sub>3</sub>)

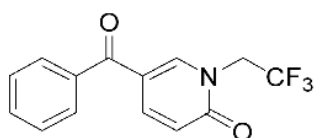

3x

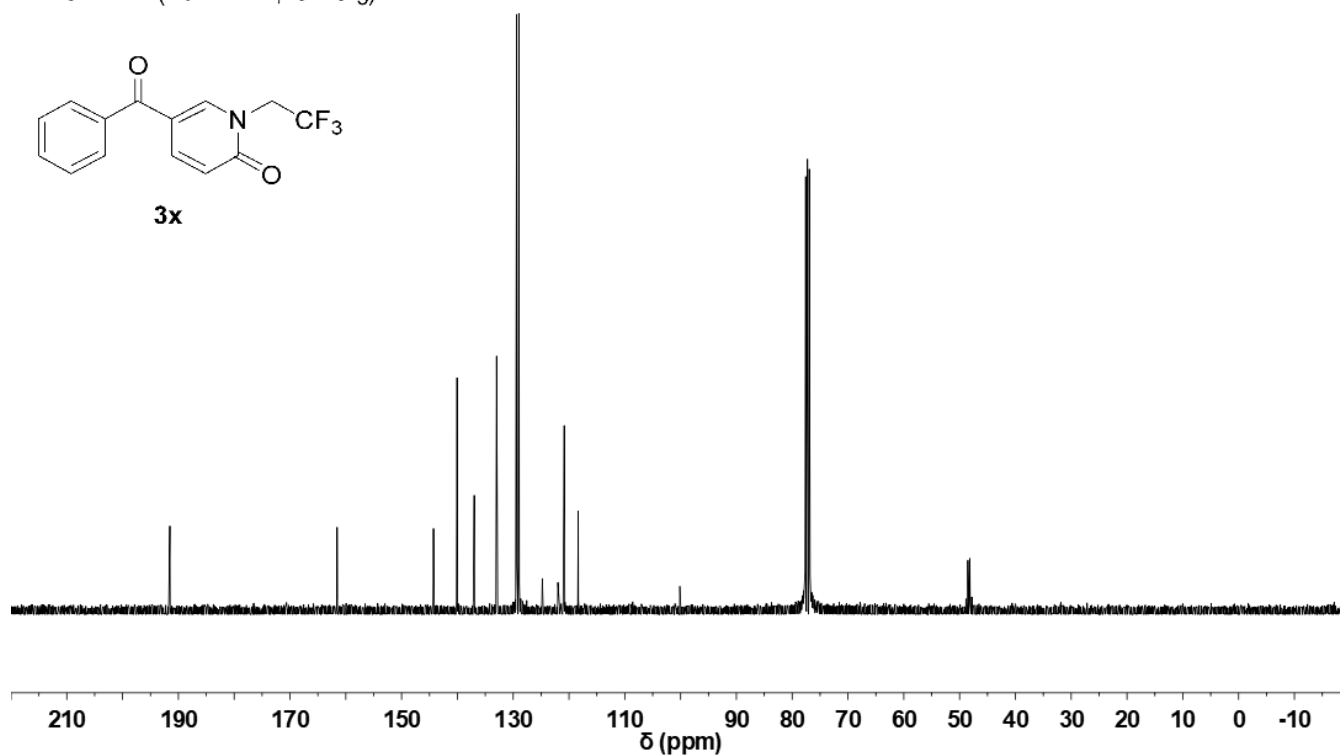

$^{19}\text{F}$  NMR (471 MHz,  $\text{CDCl}_3$ )

---64.948

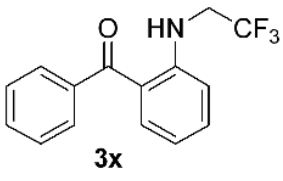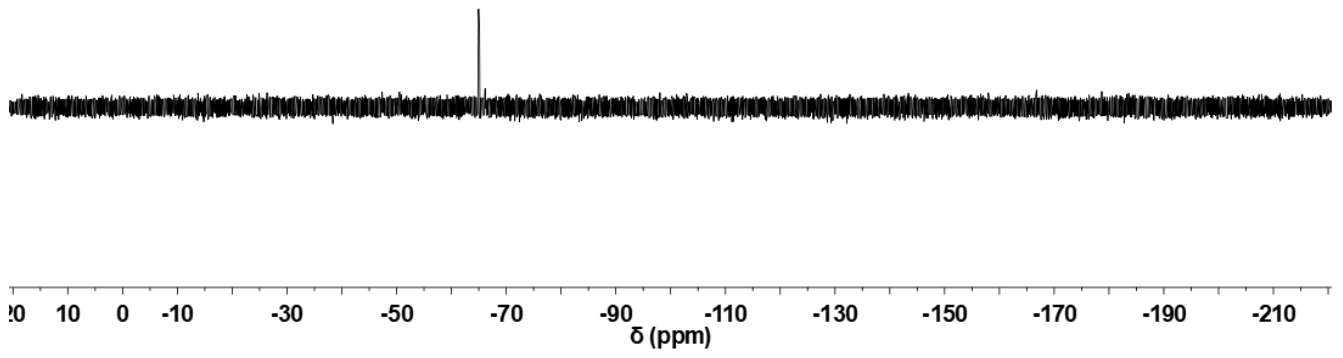

7.928  
7.923  
7.837  
7.832  
7.818  
7.813  
7.645  
7.642  
7.640  
7.630  
7.626  
7.623  
7.558  
7.556  
7.547  
7.543  
7.540  
7.531  
7.529  
7.526  
7.462  
7.459  
7.446  
7.435  
7.431  
6.569  
6.550  
5.939  
5.930  
5.918  
5.905  
5.896  
5.893  
5.884  
5.271  
5.269  
5.251  
5.249  
5.204  
5.201  
5.199  
5.170  
5.167  
5.165  
4.563  
4.560  
4.557  
4.551  
4.548  
4.546

$^1\text{H NMR}$  (500 MHz,  $\text{CDCl}_3$ )

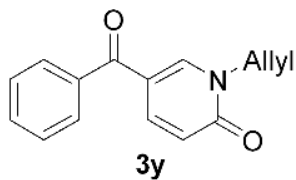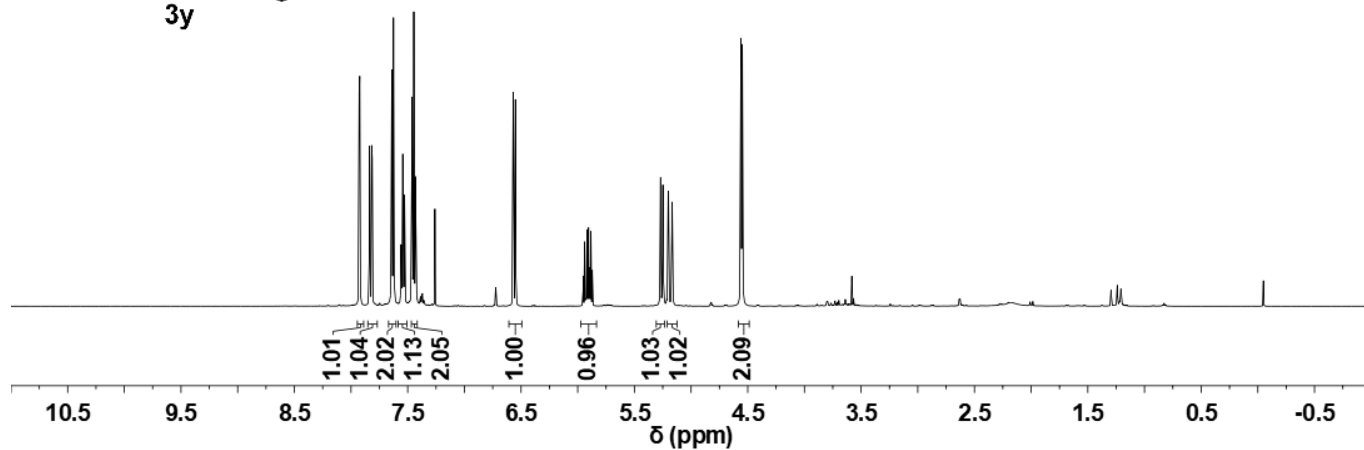

0906-z-9-2-2 C-1

191.783  
162.043  
144.129  
139.246  
137.323  
132.462  
131.753  
129.174  
128.691  
120.030  
119.570  
117.505  
51.769

$^{13}\text{C NMR}$  (126 MHz,  $\text{CDCl}_3$ )

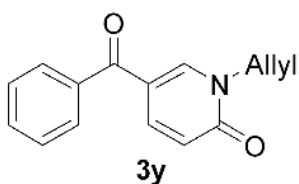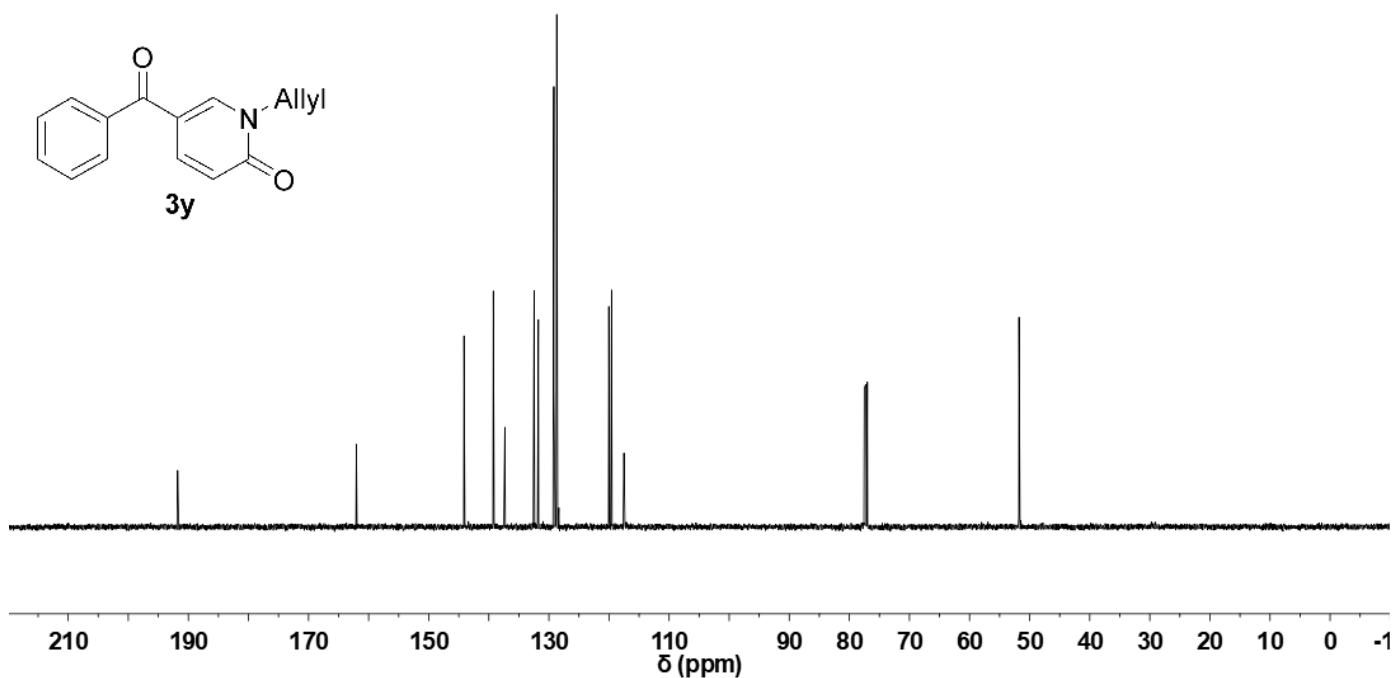

8.014  
8.008  
7.981  
7.957  
7.722  
7.704  
7.701  
7.568  
7.501  
7.498  
7.482  
7.461  
7.444  
7.389  
7.385  
6.797  
6.687

$^1\text{H}$  NMR (400 MHz,  $\text{CDCl}_3$ )

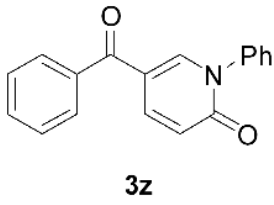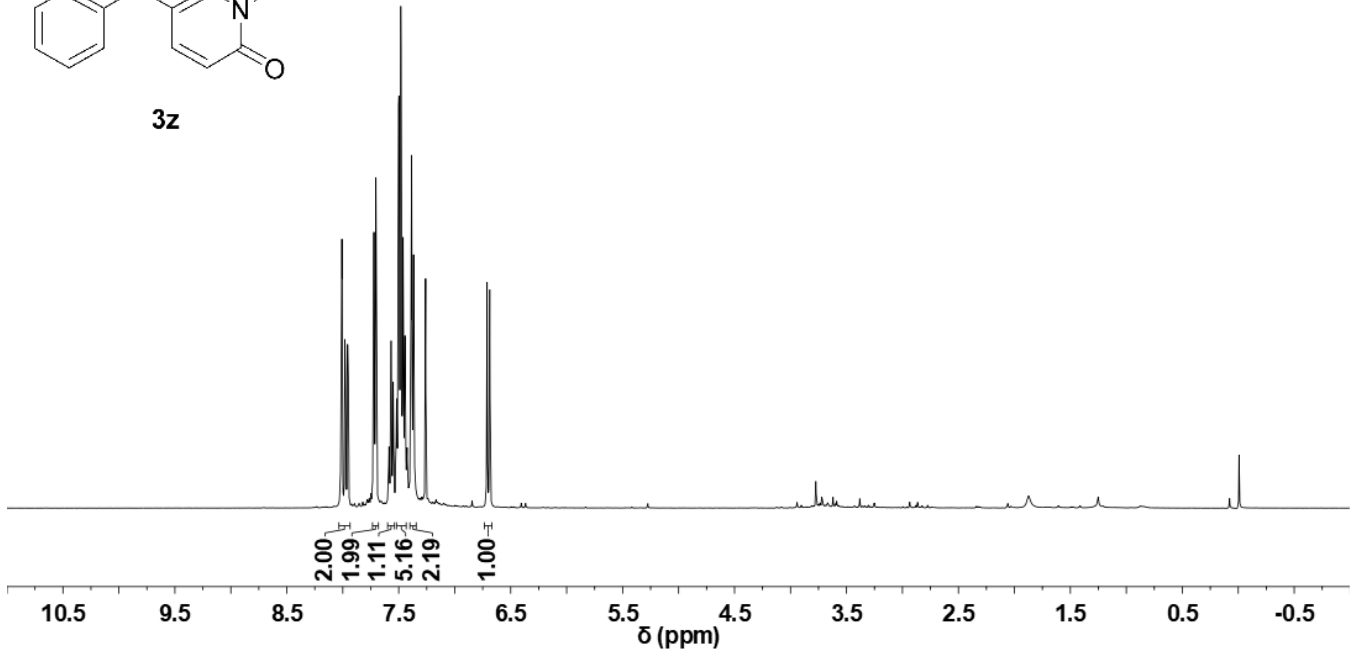

191.911  
162.113  
144.923  
140.224  
139.611  
137.274  
132.593  
129.742  
129.309  
129.221  
128.833  
126.569  
121.023  
117.553

$^{13}\text{C}$  NMR (101 MHz,  $\text{CDCl}_3$ )

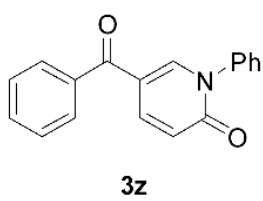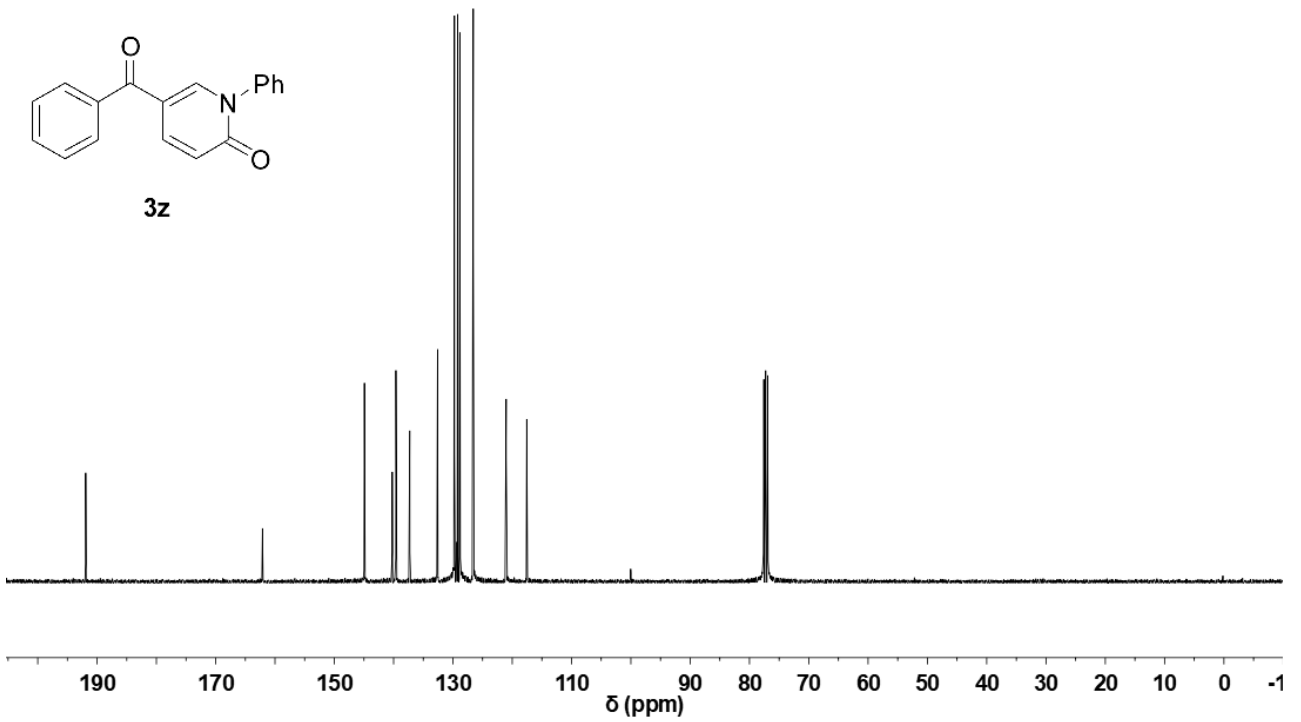

8.005  
8.003  
8.001  
7.971  
7.952  
7.716  
7.700  
7.554  
7.509  
7.505  
7.495  
7.492  
7.486  
7.470  
7.309  
6.697  
6.678

1.332

<sup>1</sup>H NMR (500 MHz, CDCl<sub>3</sub>)

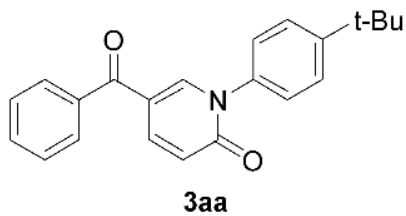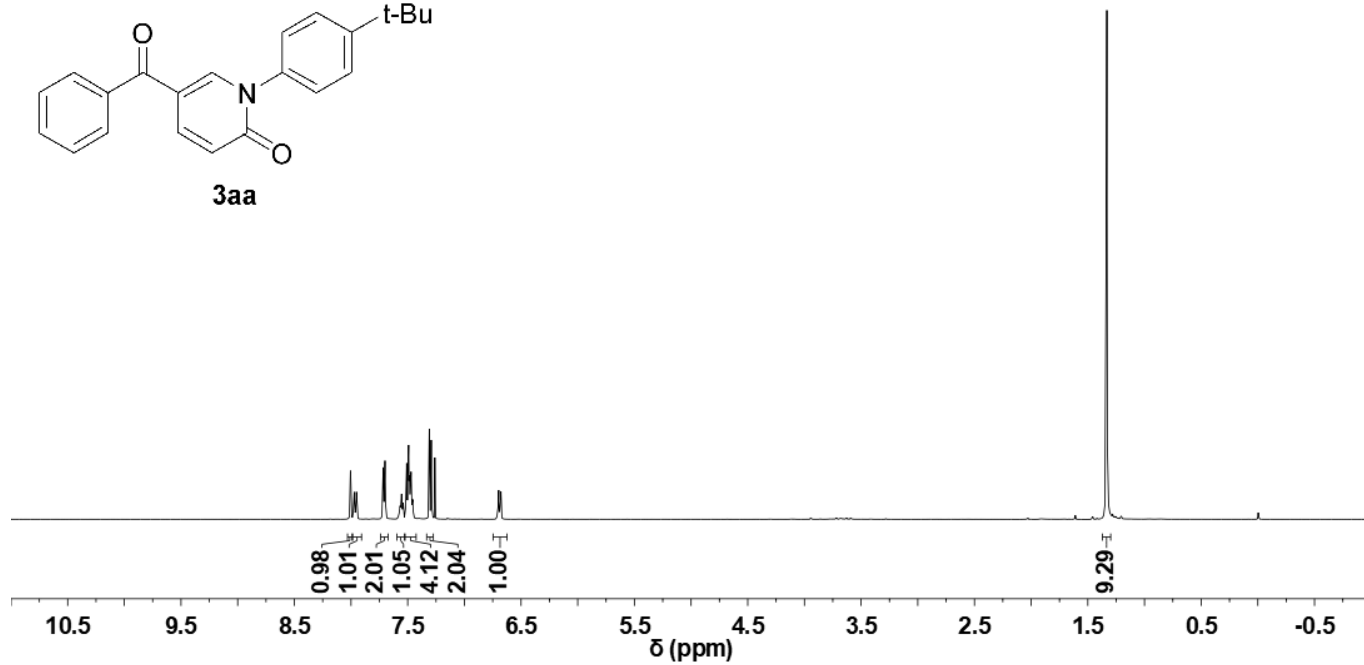

191.866  
162.192  
152.342  
145.108  
139.432  
137.640  
137.409  
132.468  
129.188  
128.790  
126.681  
125.975  
120.977  
117.490  
34.924  
31.392

<sup>13</sup>C NMR (126 MHz, CDCl<sub>3</sub>)

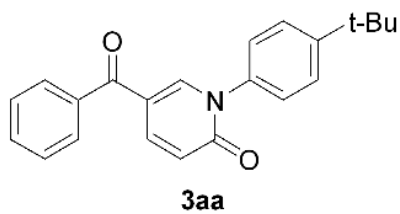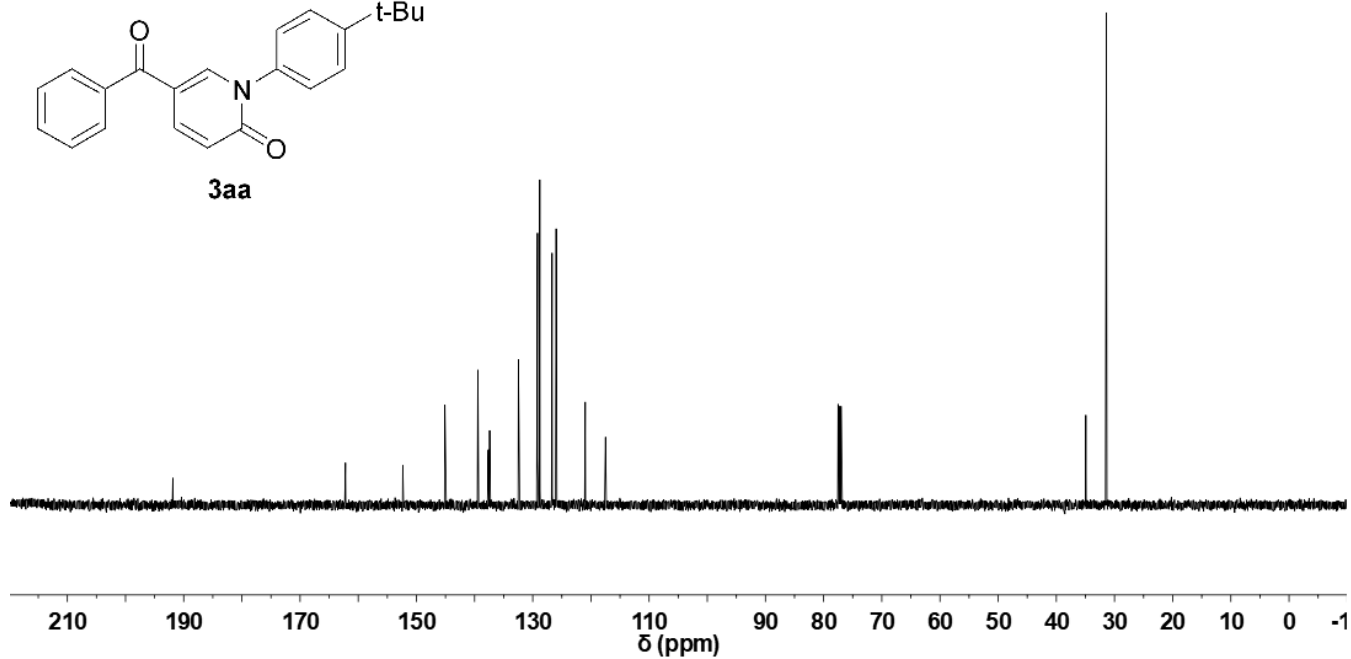



7.865  
7.847  
7.841  
7.782  
7.776  
7.520  
7.453  
7.435  
7.393  
7.374  
7.368  
7.359  
7.348  
7.323  
7.319  
7.303  
6.697  
6.633  
6.446  
6.429  
6.411  
6.393

1.719  
1.702

<sup>1</sup>H NMR (400 MHz, CDCl<sub>3</sub>)

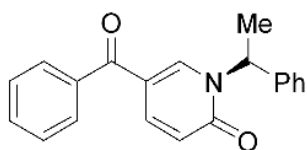

**3ab**

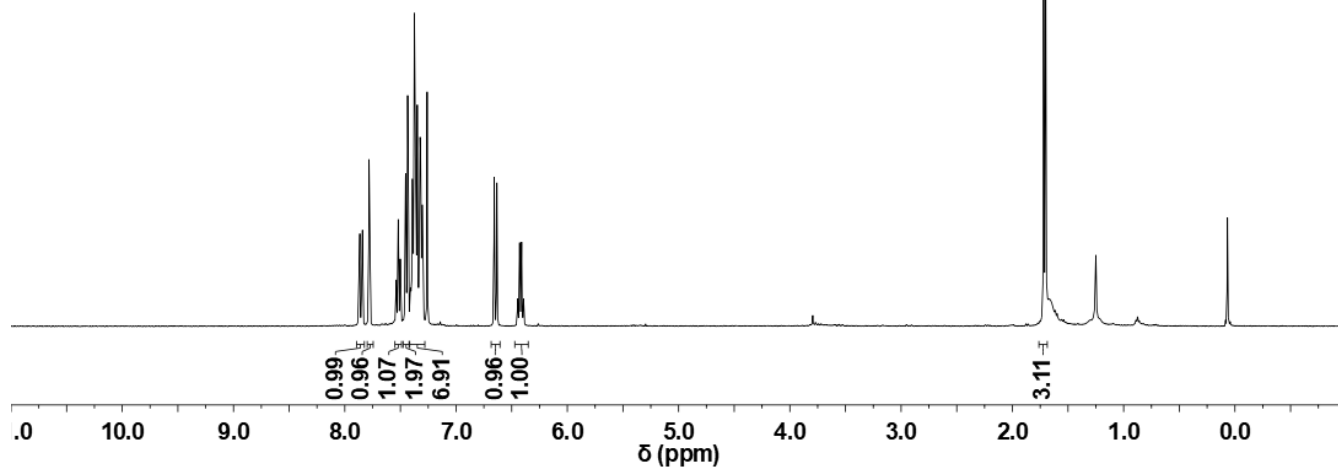

-191.719

-162.264

-142.218

-139.500

-138.619

-137.225

-132.455

-129.362

-129.304

-128.707

-128.648

-127.763

-120.092

-117.548

-53.871

-19.155

<sup>13</sup>C NMR (101 MHz, CDCl<sub>3</sub>)

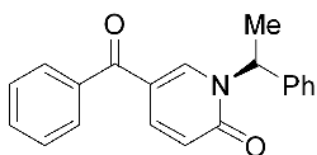

**3ab**

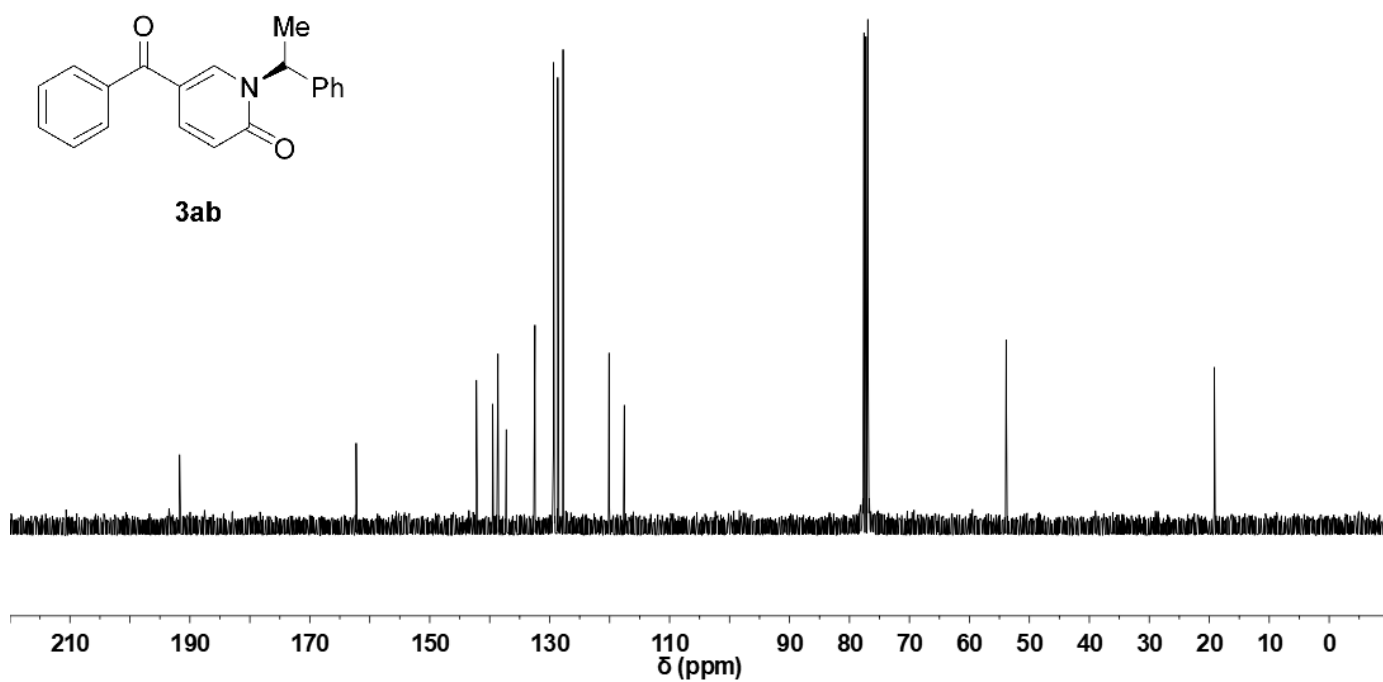

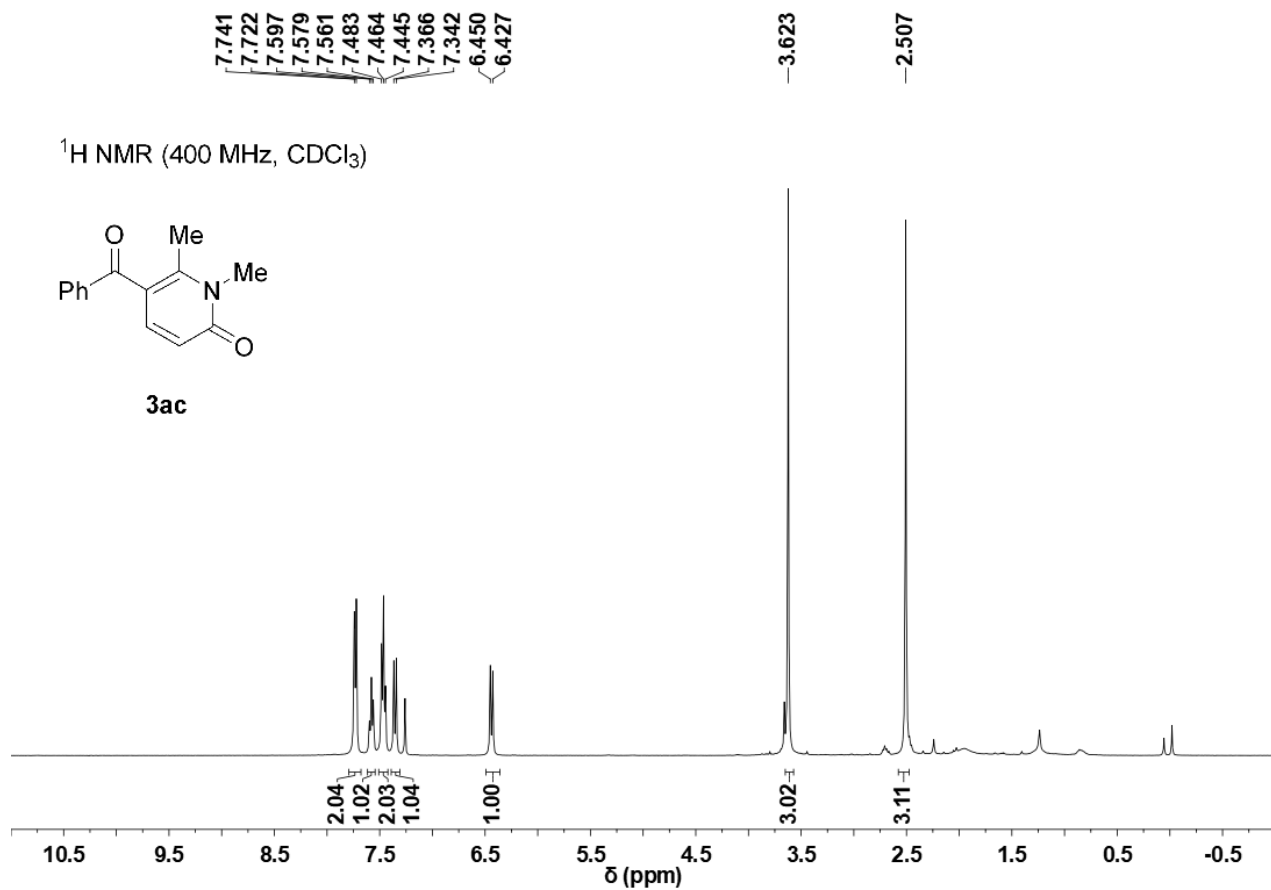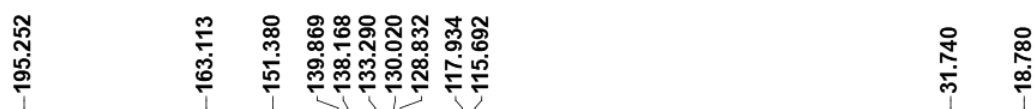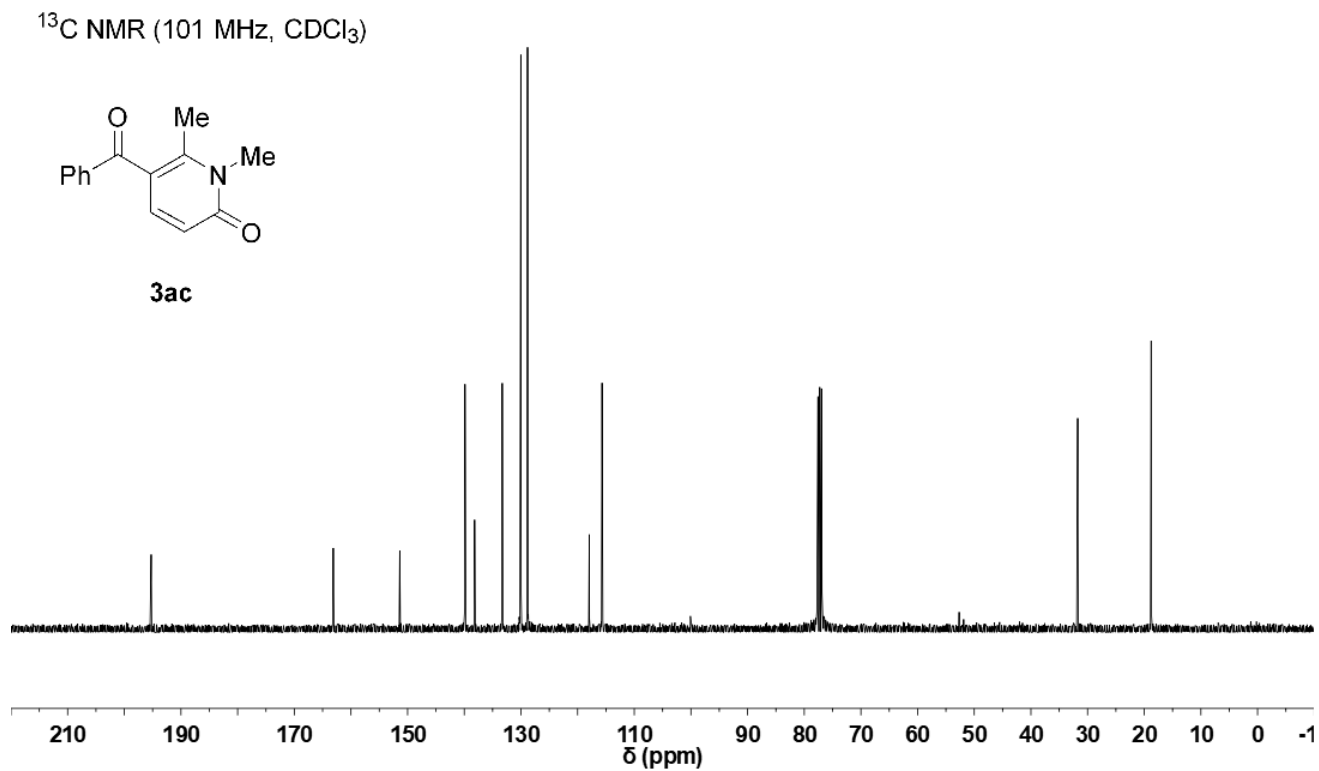

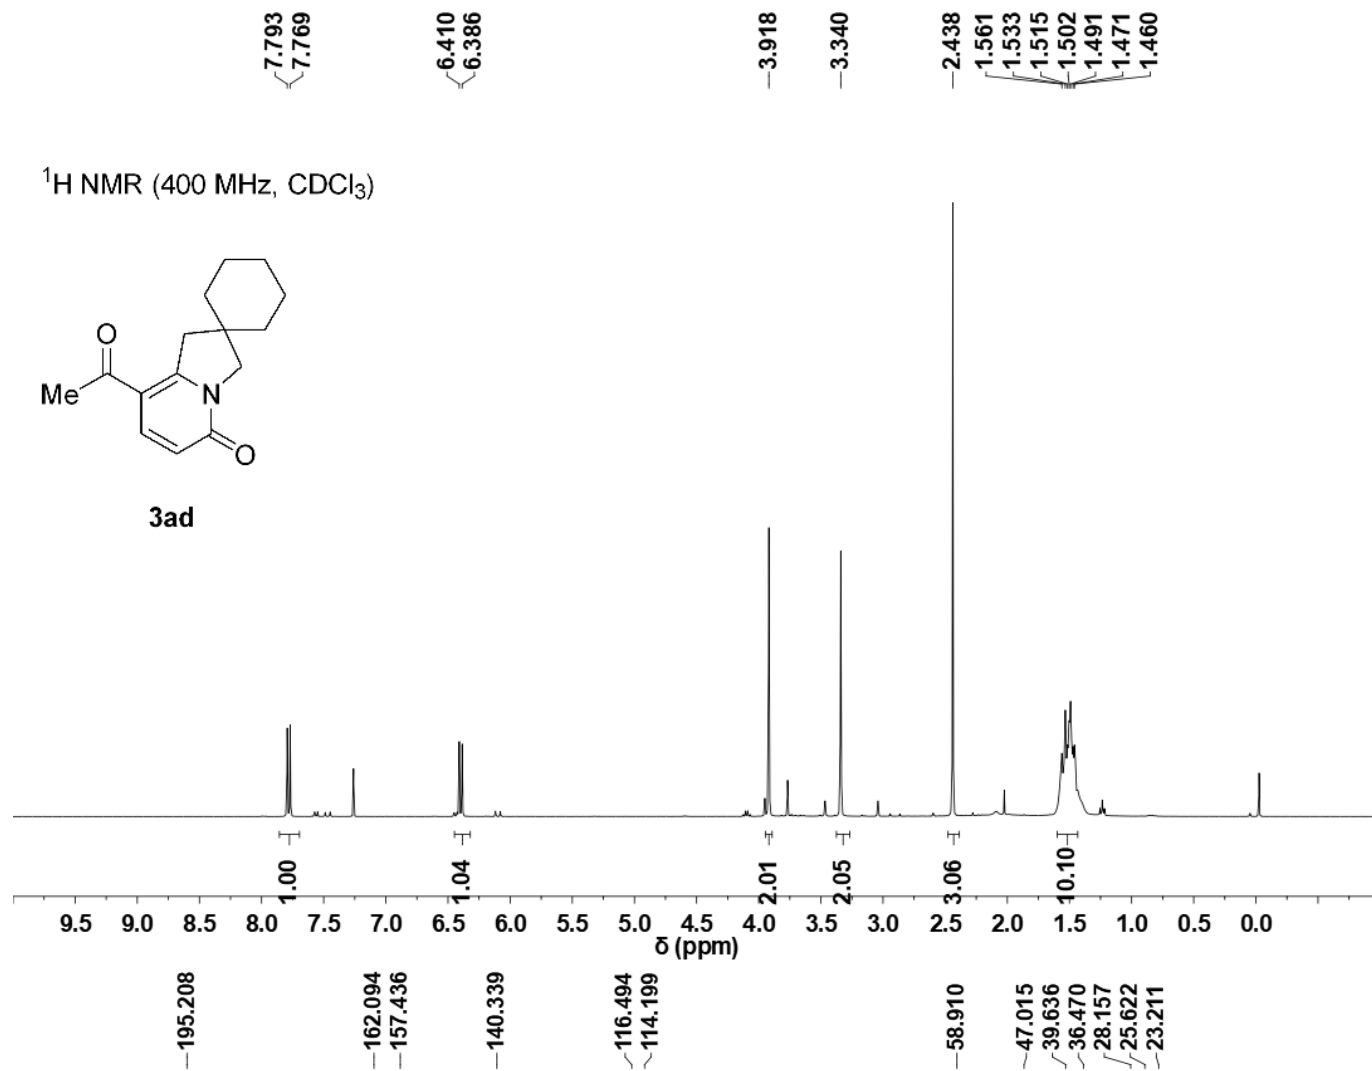

<sup>13</sup>C NMR (101 MHz, CDCl<sub>3</sub>)

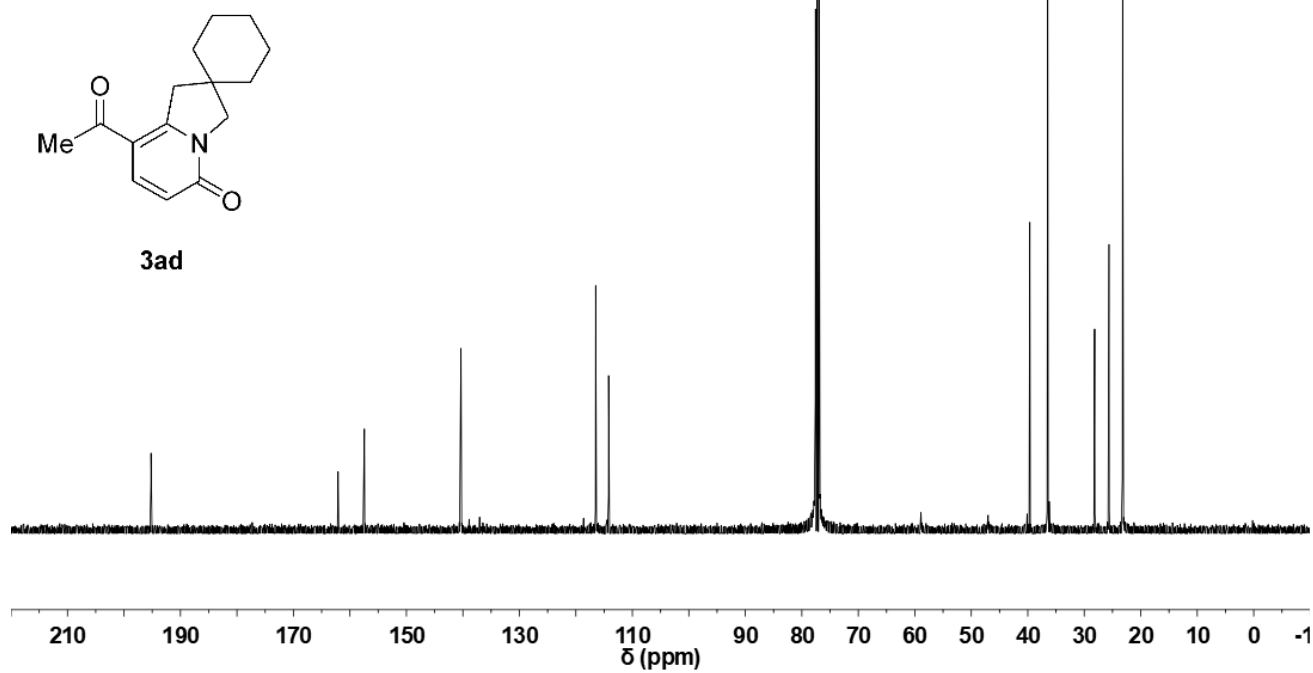

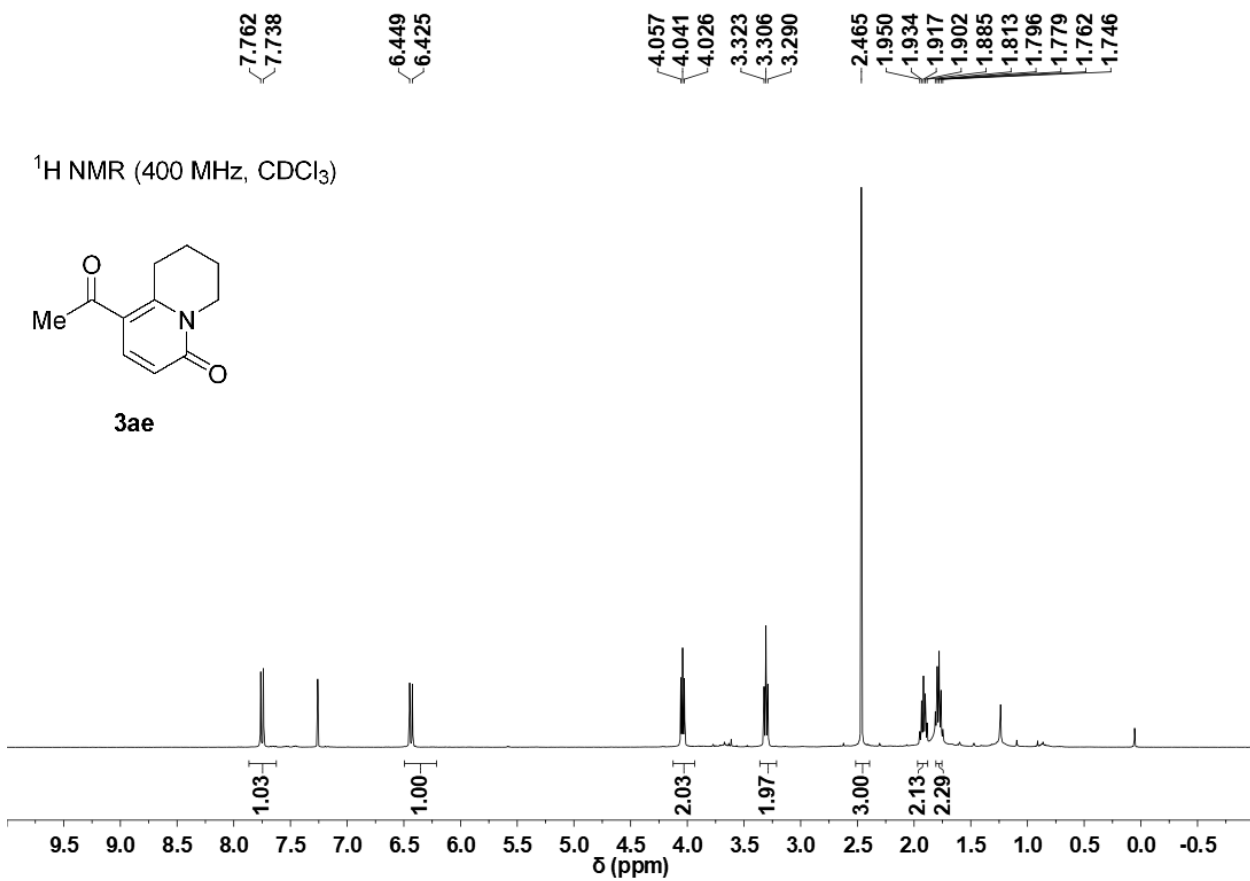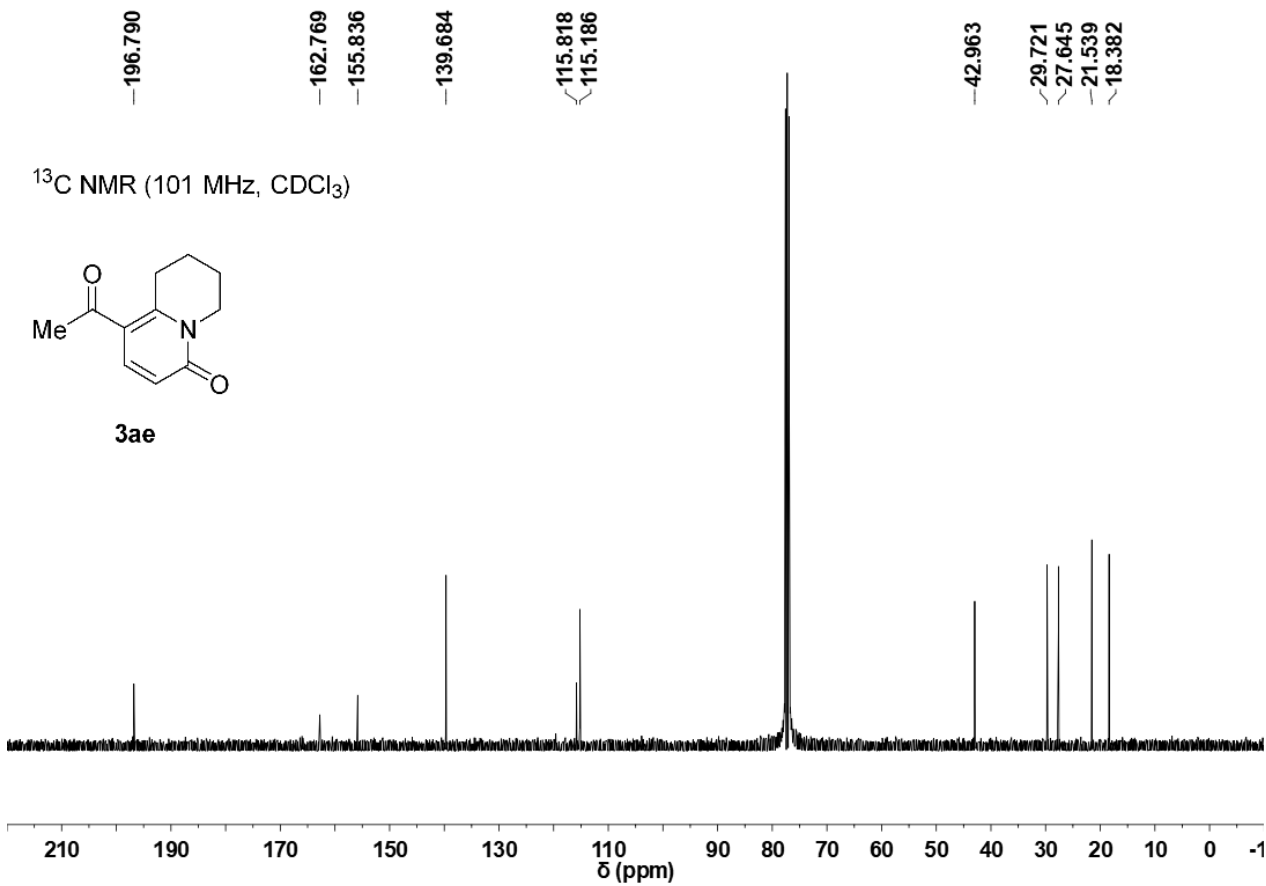

7.631  
7.607  
6.454  
6.430  
4.469  
4.456  
4.445  
3.294  
2.469  
1.783  
1.764  
1.753  
1.744

$^1\text{H}$  NMR (400 MHz,  $\text{CDCl}_3$ )

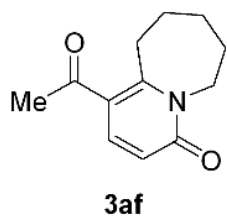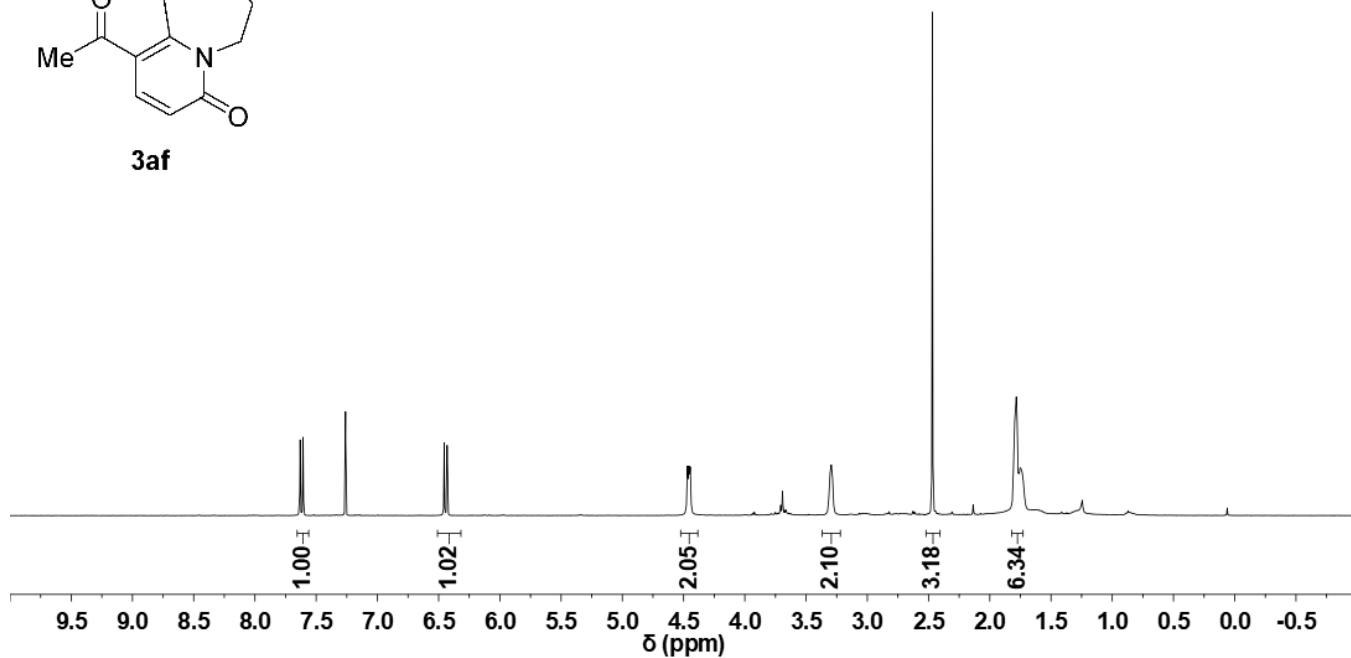

198.049  
162.537  
158.258  
139.124  
117.428  
116.477  
43.559  
29.938  
29.535  
29.242  
27.259  
25.696

$^{13}\text{C}$  NMR (101 MHz,  $\text{CDCl}_3$ )

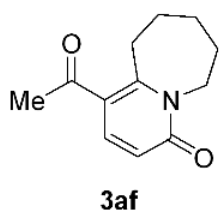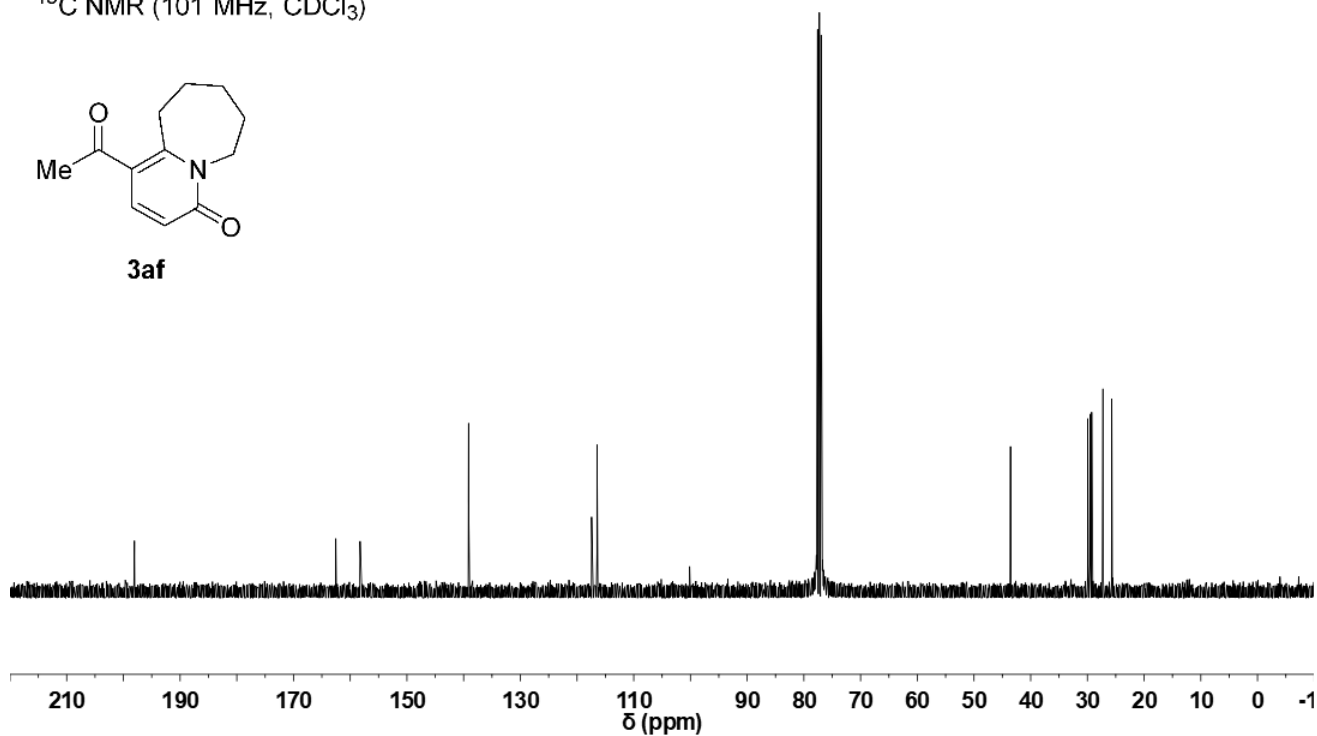

11.015  
 7.605  
 7.572  
 7.566  
 7.464  
 7.450  
 7.445  
 7.435  
 7.425  
 7.421  
 7.418  
 7.416  
 7.398  
 5.609  
 5.567  
 3.654  
 3.211  
 3.210  
 3.199  
 3.197

$^1\text{H}$  NMR (400 MHz,  $\text{CDCl}_3$ )

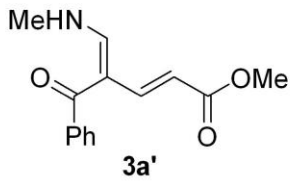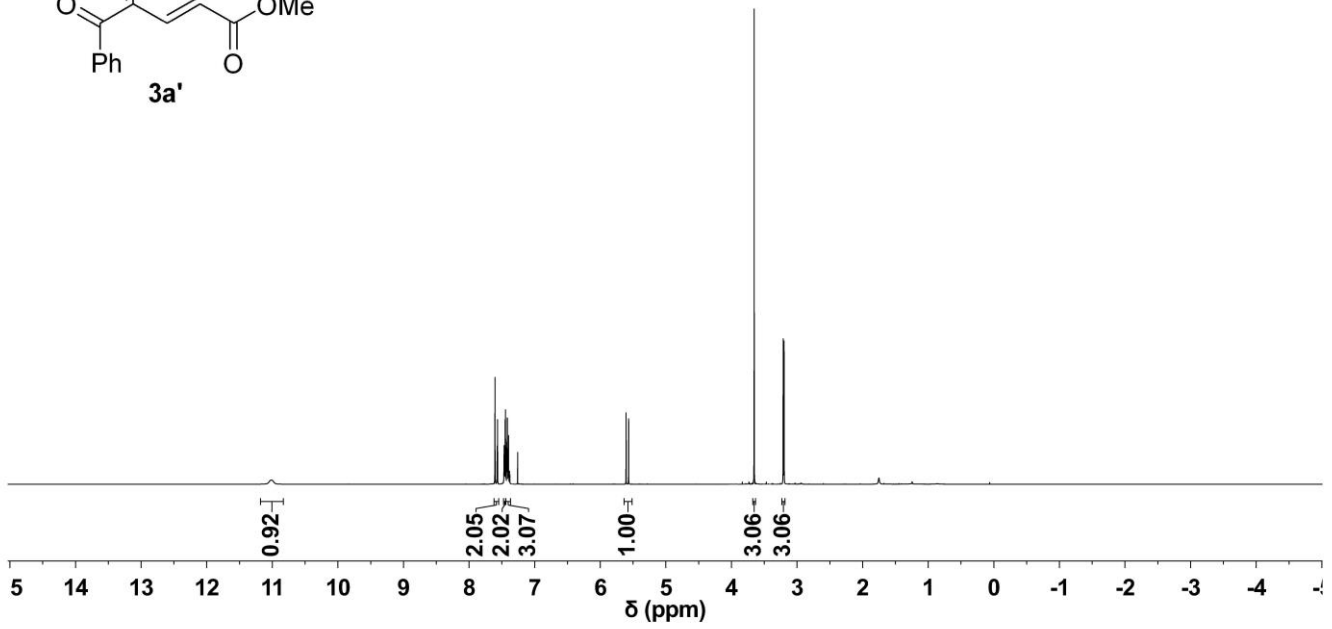

195.188  
 168.471  
 157.564  
 145.387  
 140.364  
 130.534  
 128.422  
 128.110  
 105.354  
 103.368  
 51.357  
 36.563

$^{13}\text{C}$  NMR (101 MHz,  $\text{CDCl}_3$ )

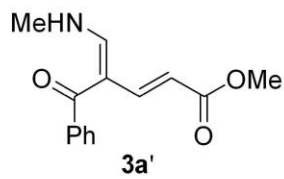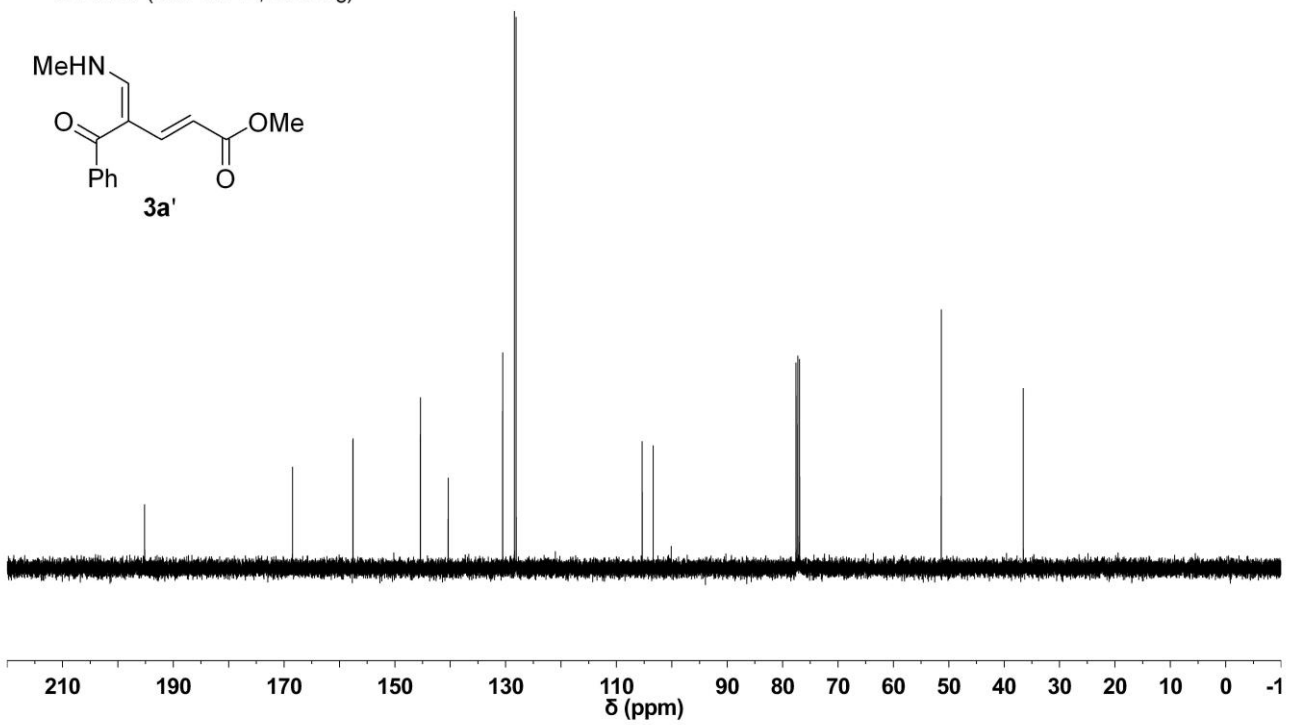

7.879  
7.876  
7.872  
7.865  
7.859  
7.855  
7.462  
7.452  
7.444  
7.437  
7.430  
7.426  
7.422  
7.418  
7.412  
7.409  
7.399  
7.398  
7.394  
7.389  
7.381  
7.377  
5.746  
5.718

3.686  
3.595  
3.102  
2.917  
2.639  
2.622  
2.605

$^1\text{H NMR}$  (400 MHz,  $\text{CDCl}_3$ )

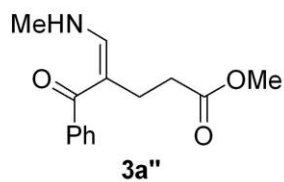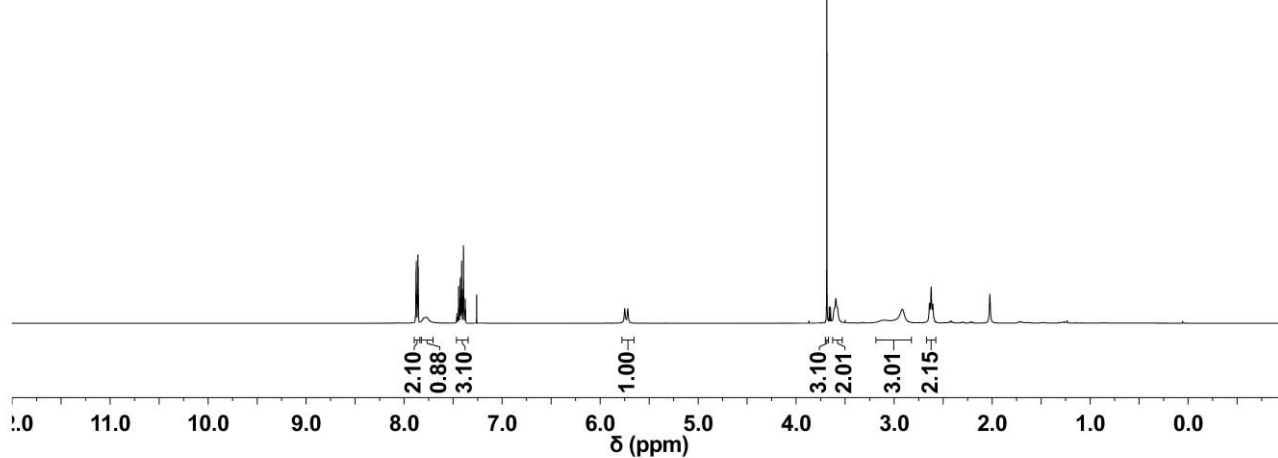

189.029  
171.384  
153.563  
140.361  
131.157  
128.261  
127.640  
93.211  
53.589  
52.162  
35.844  
33.845

$^{13}\text{C NMR}$  (101 MHz,  $\text{CDCl}_3$ )

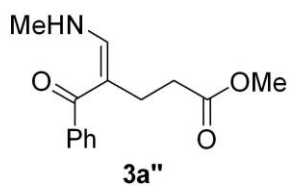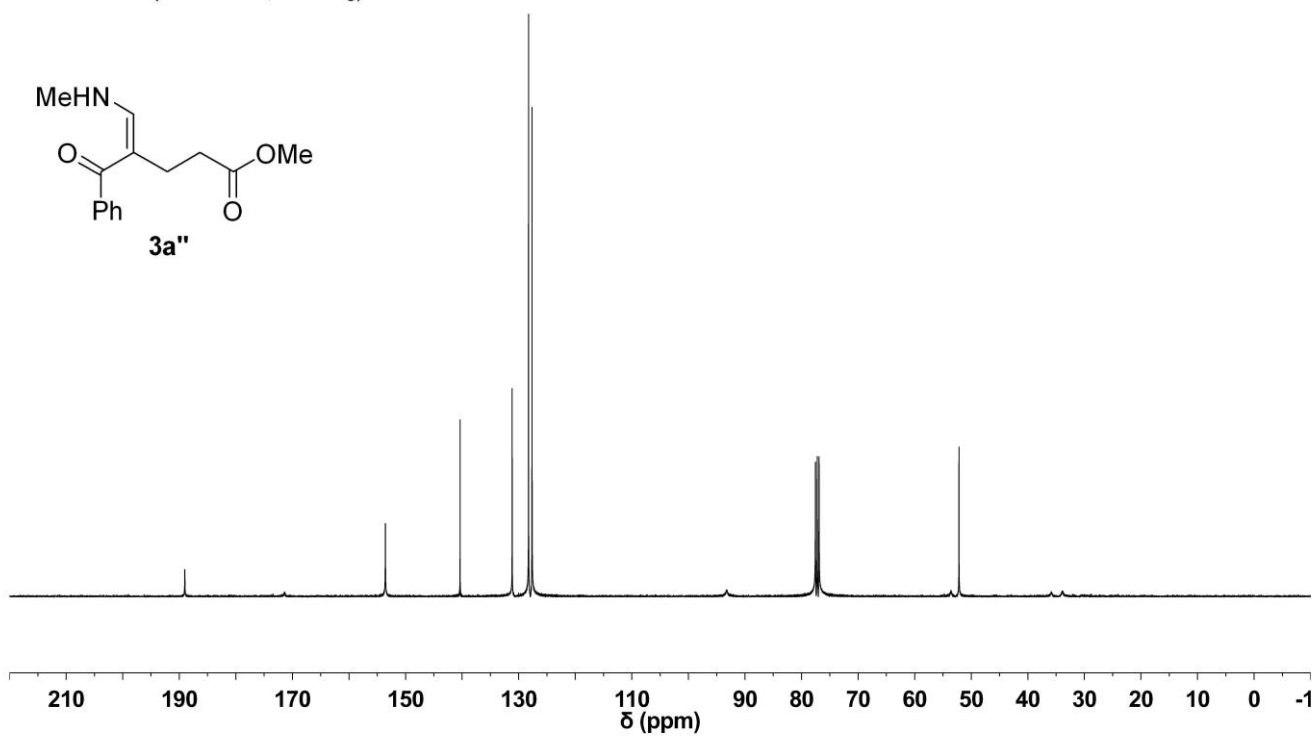

Supplement: d0cc06834a1.pdf [file d0cc06834a1.pdf]
